# Supplementary material
Source: publisher figshare collection journal article supplement (https://acs.figshare.com/ndownloader/files/5626053)
Supplement: Supplementary file 1 [file 5626053]

data_dc369_0m
_audit_creation_date              2015-12-27
_audit_creation_method
;
Olex2 1.2
(compiled 2015.09.30 svn.r3233 for OlexSys, GUI svn.r5103)
;
_shelxl_version_number            2014-3
_publ_contact_author_address 
;
Chemistry Department, Durham University, South Road, Durham, DH1 3LE, UK
;
_publ_contact_author_email        andy.whiting@durham.ac.uk
_publ_contact_author_name         'Andrew Whiting'
_publ_contact_author_phone        ?
_publ_requested_journal           'J. Org. Chem.'
_publ_section_references
;
Dolomanov, O.V., Bourhis, L.J., Gildea, R.J, Howard, J.A.K. & Puschmann, H.
 (2009), J. Appl. Cryst. 42, 339-341.

Sheldrick, G.M. (2015). Acta Cryst. A71, 3-8.

Sheldrick, G.M. (2015). Acta Cryst. C71, 3-8.
;
_chemical_name_common             ?
_chemical_name_systematic         4-{[(1Z)-3-Oxobut-1-en-1-yl]amino}benzoate
_chemical_formula_moiety          'C13 H15 N O3'
_chemical_formula_sum             'C13 H15 N O3'
_chemical_formula_weight          233.26
_chemical_melting_point           75-76
loop_
  _atom_type_symbol
  _atom_type_description
  _atom_type_scat_dispersion_real
  _atom_type_scat_dispersion_imag
  _atom_type_scat_source
 'C' 'C' 0.0181 0.0091 'International Tables Vol C Tables 4.2.6.8 and 6.1.1.4'
 'H' 'H' 0.0000 0.0000 'International Tables Vol C Tables 4.2.6.8 and 6.1.1.4'
 'N' 'N' 0.0311 0.0180 'International Tables Vol C Tables 4.2.6.8 and 6.1.1.4'
 'O' 'O' 0.0492 0.0322 'International Tables Vol C Tables 4.2.6.8 and 6.1.1.4'

_shelx_space_group_comment
;
The symmetry employed for this shelxl refinement is uniquely defined
by the following loop, which should always be used as a source of
symmetry information in preference to the above space-group names.
They are only intended as comments.
;
_space_group_crystal_system       'monoclinic'
_space_group_IT_number            14
_space_group_name_H-M_alt         'P 1 21/c 1'
_space_group_name_Hall            '-P 2ybc'
loop_
  _space_group_symop_operation_xyz
 'x, y, z'
 '-x, y+1/2, -z+1/2'
 '-x, -y, -z'
 'x, -y-1/2, z-1/2'

_cell_length_a                    15.2021(11)
_cell_length_b                    5.4894(4)
_cell_length_c                    15.9041(12)
_cell_angle_alpha                 90
_cell_angle_beta                  113.3450(10)
_cell_angle_gamma                 90
_cell_volume                      1218.55(16)
_cell_formula_units_Z             4
_cell_measurement_reflns_used     9927
_cell_measurement_temperature     120.0
_cell_measurement_theta_max       69.04
_cell_measurement_theta_min       3.17
_shelx_estimated_absorpt_T_max    ?
_shelx_estimated_absorpt_T_min    ?
_exptl_absorpt_coefficient_mu     0.743
_exptl_absorpt_correction_T_max   0.7532
_exptl_absorpt_correction_T_min   0.6734
_exptl_absorpt_correction_type    multi-scan
_exptl_absorpt_process_details
;
SADABS-2014/5 (Bruker,2014) was used for absorption correction.
wR2(int) was 0.0499 before and 0.0321 after correction.
The Ratio of minimum to maximum transmission is 0.8941.
The \l/2 correction factor is 0.00150.
;
_exptl_crystal_colour             'clear colourless'
_exptl_crystal_colour_lustre      clear
_exptl_crystal_colour_primary     colourless
_exptl_crystal_density_diffrn     1.271
_exptl_crystal_density_meas       ?
_exptl_crystal_density_method     ?
_exptl_crystal_description        block
_exptl_crystal_F_000              496
_exptl_crystal_preparation        ?
_exptl_crystal_recrystallization_method
'The material was recrystallised from EtOAc by slow evaporation'
_exptl_crystal_size_max           0.2
_exptl_crystal_size_mid           0.2
_exptl_crystal_size_min           0.1
_exptl_special_details
;
 ?
;
_exptl_transmission_factor_max    ?
_exptl_transmission_factor_min    ?
_diffrn_reflns_av_R_equivalents   0.0256
_diffrn_reflns_av_unetI/netI      0.0185
_diffrn_reflns_Laue_measured_fraction_full 0.995
_diffrn_reflns_Laue_measured_fraction_max 0.987
_diffrn_reflns_limit_h_max        18
_diffrn_reflns_limit_h_min        -18
_diffrn_reflns_limit_k_max        6
_diffrn_reflns_limit_k_min        -6
_diffrn_reflns_limit_l_max        19
_diffrn_reflns_limit_l_min        -19
_diffrn_reflns_number             14316
_diffrn_reflns_point_group_measured_fraction_full 0.995
_diffrn_reflns_point_group_measured_fraction_max 0.987
_diffrn_reflns_theta_full         67.679
_diffrn_reflns_theta_max          68.951
_diffrn_reflns_theta_min          3.166
_diffrn_ambient_temperature       120.0
_diffrn_detector                  'Platinum CCD detector'
_diffrn_detector_area_resol_mean  7.9
_diffrn_detector_type             'CCD area detector'
_diffrn_measured_fraction_theta_full 0.995
_diffrn_measured_fraction_theta_max 0.987
_diffrn_measurement_device        'three-circle diffractometer'
_diffrn_measurement_device_type   'Bruker MicroStar'
_diffrn_measurement_method        '\w and \f scans'
_diffrn_radiation_monochromator   'Helios mirror optics'
_diffrn_radiation_probe           x-ray
_diffrn_radiation_type            CuK\a
_diffrn_radiation_wavelength      1.54178
_diffrn_source                    'rotating anode'
_diffrn_source_type               'Incoatec I\ms'
_diffrn_standards_number          0
_reflns_Friedel_coverage          0.000
_reflns_Friedel_fraction_full     .
_reflns_Friedel_fraction_max      .
_reflns_number_gt                 2208
_reflns_number_total              2246
_reflns_special_details
;
 Reflections were merged by SHELXL according to the crystal
 class for the calculation of statistics and refinement.
 
 _reflns_Friedel_fraction is defined as the number of unique
 Friedel pairs measured divided by the number that would be
 possible theoretically, ignoring centric projections and
 systematic absences.
;
_reflns_threshold_expression      'I > 2\s(I)'
_computing_cell_refinement        'SAINT v8.34A (Bruker, 2013)'
_computing_data_collection        ?
_computing_data_reduction         'SAINT v8.34A (Bruker, 2013)'
_computing_molecular_graphics     'Olex2 (Dolomanov et al., 2009)'
_computing_publication_material   'Olex2 (Dolomanov et al., 2009)'
_computing_structure_refinement   'ShelXL (Sheldrick, 2015)'
_computing_structure_solution     'ShelXT (Sheldrick, 2015)'
_refine_diff_density_max          0.236
_refine_diff_density_min          -0.315
_refine_diff_density_rms          0.051
_refine_ls_extinction_coef        .
_refine_ls_extinction_method      none
_refine_ls_goodness_of_fit_ref    1.038
_refine_ls_hydrogen_treatment     constr
_refine_ls_matrix_type            full
_refine_ls_number_parameters      156
_refine_ls_number_reflns          2246
_refine_ls_number_restraints      0
_refine_ls_R_factor_all           0.0402
_refine_ls_R_factor_gt            0.0399
_refine_ls_restrained_S_all       1.038
_refine_ls_shift/su_max           0.000
_refine_ls_shift/su_mean          0.000
_refine_ls_structure_factor_coef  Fsqd
_refine_ls_weighting_details
'w=1/[\s^2^(Fo^2^)+(0.0570P)^2^+0.4869P] where P=(Fo^2^+2Fc^2^)/3'
_refine_ls_weighting_scheme       calc
_refine_ls_wR_factor_gt           0.1058
_refine_ls_wR_factor_ref          0.1062
_refine_special_details           ?
_olex2_refinement_description
;
1. Fixed Uiso
 At 1.2 times of:
  All C(H) groups, All C(H,H) groups, All N(H) groups
 At 1.5 times of:
  All C(H,H,H) groups
2.a Secondary CH2 refined with riding coordinates:
 C16(H16A,H16B)
2.b Aromatic/amide H refined with riding coordinates:
 N7(H7), C2(H2), C3(H3), C5(H5), C6(H6), C8(H8), C9(H9)
2.c Idealised Me refined as rotating group:
 C11(H11A,H11B,H11C), C17(H17A,H17B,H17C)
;
_atom_sites_solution_hydrogens    geom
_atom_sites_solution_primary      ?
_atom_sites_solution_secondary    ?
loop_
  _atom_site_label
  _atom_site_type_symbol
  _atom_site_fract_x
  _atom_site_fract_y
  _atom_site_fract_z
  _atom_site_U_iso_or_equiv
  _atom_site_adp_type
  _atom_site_occupancy
  _atom_site_site_symmetry_order
  _atom_site_calc_flag
  _atom_site_refinement_flags_posn
  _atom_site_refinement_flags_adp
  _atom_site_refinement_flags_occupancy
  _atom_site_disorder_assembly
  _atom_site_disorder_group
 O12 O 0.62025(6) 0.68288(16) 0.55382(6) 0.0295(2) Uani 1 1 d . . . . .
 O14 O 0.14763(7) 0.9706(2) 0.73875(7) 0.0398(3) Uani 1 1 d . . . . .
 O15 O 0.11036(6) 0.64522(17) 0.64540(6) 0.0305(2) Uani 1 1 d . . . . .
 N7 N 0.49942(7) 0.90976(18) 0.61170(6) 0.0219(2) Uani 1 1 d . . . . .
 H7 H 0.5104 0.7812 0.5842 0.026 Uiso 1 1 calc R . . . .
 C1 C 0.41670(8) 0.9025(2) 0.62984(7) 0.0214(3) Uani 1 1 d . . . . .
 C2 C 0.39396(8) 1.0810(2) 0.68046(8) 0.0243(3) Uani 1 1 d . . . . .
 H2 H 0.4348 1.2177 0.7033 0.029 Uiso 1 1 calc R . . . .
 C3 C 0.31145(9) 1.0581(2) 0.69734(8) 0.0250(3) Uani 1 1 d . . . . .
 H3 H 0.2962 1.1803 0.7317 0.030 Uiso 1 1 calc R . . . .
 C4 C 0.25071(8) 0.8585(2) 0.66463(7) 0.0227(3) Uani 1 1 d . . . . .
 C5 C 0.27381(8) 0.6817(2) 0.61367(8) 0.0234(3) Uani 1 1 d . . . . .
 H5 H 0.2328 0.5454 0.5906 0.028 Uiso 1 1 calc R . . . .
 C6 C 0.35571(8) 0.7030(2) 0.59644(8) 0.0234(3) Uani 1 1 d . . . . .
 H6 H 0.3706 0.5813 0.5617 0.028 Uiso 1 1 calc R . . . .
 C8 C 0.56433(8) 1.0908(2) 0.63145(8) 0.0244(3) Uani 1 1 d . . . . .
 H8 H 0.5520 1.2368 0.6570 0.029 Uiso 1 1 calc R . . . .
 C9 C 0.64634(8) 1.0765(2) 0.61698(8) 0.0249(3) Uani 1 1 d . . . . .
 H9 H 0.6878 1.2138 0.6317 0.030 Uiso 1 1 calc R . . . .
 C10 C 0.67350(8) 0.8633(2) 0.58044(7) 0.0229(3) Uani 1 1 d . . . . .
 C11 C 0.77093(9) 0.8586(3) 0.57653(9) 0.0316(3) Uani 1 1 d . . . . .
 H11A H 0.8140 0.7547 0.6258 0.047 Uiso 1 1 calc GR . . . .
 H11B H 0.7969 1.0243 0.5841 0.047 Uiso 1 1 calc GR . . . .
 H11C H 0.7653 0.7936 0.5172 0.047 Uiso 1 1 calc GR . . . .
 C13 C 0.16552(8) 0.8355(2) 0.68749(8) 0.0264(3) Uani 1 1 d . . . . .
 C16 C 0.02611(9) 0.6055(3) 0.66536(10) 0.0380(4) Uani 1 1 d . . . . .
 H16A H -0.0141 0.7541 0.6511 0.046 Uiso 1 1 calc R . . . .
 H16B H 0.0454 0.5667 0.7311 0.046 Uiso 1 1 calc R . . . .
 C17 C -0.02852(10) 0.3985(3) 0.60778(10) 0.0386(3) Uani 1 1 d . . . . .
 H17A H -0.0490 0.4408 0.5429 0.058 Uiso 1 1 calc GR . . . .
 H17B H -0.0850 0.3648 0.6212 0.058 Uiso 1 1 calc GR . . . .
 H17C H 0.0124 0.2535 0.6214 0.058 Uiso 1 1 calc GR . . . .

loop_
  _atom_site_aniso_label
  _atom_site_aniso_U_11
  _atom_site_aniso_U_22
  _atom_site_aniso_U_33
  _atom_site_aniso_U_23
  _atom_site_aniso_U_13
  _atom_site_aniso_U_12
 O12 0.0312(5) 0.0251(5) 0.0349(5) -0.0043(4) 0.0160(4) -0.0026(4)
 O14 0.0349(5) 0.0515(6) 0.0397(5) -0.0157(5) 0.0218(4) -0.0019(4)
 O15 0.0243(4) 0.0412(5) 0.0301(5) -0.0057(4) 0.0151(4) -0.0043(4)
 N7 0.0243(5) 0.0210(5) 0.0205(5) -0.0014(4) 0.0089(4) 0.0007(4)
 C1 0.0218(5) 0.0238(6) 0.0165(5) 0.0039(4) 0.0055(4) 0.0023(4)
 C2 0.0252(6) 0.0243(6) 0.0205(5) -0.0007(4) 0.0059(5) -0.0020(5)
 C3 0.0295(6) 0.0254(6) 0.0189(5) -0.0015(4) 0.0083(5) 0.0041(5)
 C4 0.0223(5) 0.0271(6) 0.0170(5) 0.0022(4) 0.0058(4) 0.0037(5)
 C5 0.0235(6) 0.0234(6) 0.0217(5) -0.0004(4) 0.0074(4) -0.0010(5)
 C6 0.0251(6) 0.0226(6) 0.0231(6) -0.0007(4) 0.0102(5) 0.0014(5)
 C8 0.0274(6) 0.0239(6) 0.0207(6) -0.0015(4) 0.0081(5) -0.0014(5)
 C9 0.0256(6) 0.0260(6) 0.0214(5) -0.0013(5) 0.0074(5) -0.0037(5)
 C10 0.0229(6) 0.0267(6) 0.0176(5) 0.0041(4) 0.0066(4) 0.0005(5)
 C11 0.0248(6) 0.0380(7) 0.0330(7) 0.0053(6) 0.0126(5) 0.0025(5)
 C13 0.0243(6) 0.0334(7) 0.0198(5) 0.0001(5) 0.0069(5) 0.0031(5)
 C16 0.0271(6) 0.0568(9) 0.0368(7) -0.0055(7) 0.0197(6) -0.0066(6)
 C17 0.0300(7) 0.0489(9) 0.0412(7) 0.0000(6) 0.0187(6) -0.0063(6)

_geom_special_details
;
 All esds (except the esd in the dihedral angle between two l.s. planes)
 are estimated using the full covariance matrix.  The cell esds are taken
 into account individually in the estimation of esds in distances, angles
 and torsion angles; correlations between esds in cell parameters are only
 used when they are defined by crystal symmetry.  An approximate (isotropic)
 treatment of cell esds is used for estimating esds involving l.s. planes.
;
loop_
  _geom_bond_atom_site_label_1
  _geom_bond_atom_site_label_2
  _geom_bond_distance
  _geom_bond_site_symmetry_2
  _geom_bond_publ_flag
 O12 C10 1.2425(15) . ?
 O14 C13 1.2101(15) . ?
 O15 C13 1.3408(15) . ?
 O15 C16 1.4528(14) . ?
 N7 H7 0.8800 . ?
 N7 C1 1.3979(15) . ?
 N7 C8 1.3471(16) . ?
 C1 C2 1.3957(17) . ?
 C1 C6 1.3969(17) . ?
 C2 H2 0.9500 . ?
 C2 C3 1.3886(17) . ?
 C3 H3 0.9500 . ?
 C3 C4 1.3939(17) . ?
 C4 C5 1.3955(17) . ?
 C4 C13 1.4826(16) . ?
 C5 H5 0.9500 . ?
 C5 C6 1.3819(16) . ?
 C6 H6 0.9500 . ?
 C8 H8 0.9500 . ?
 C8 C9 1.3568(17) . ?
 C9 H9 0.9500 . ?
 C9 C10 1.4381(17) . ?
 C10 C11 1.5071(16) . ?
 C11 H11A 0.9800 . ?
 C11 H11B 0.9800 . ?
 C11 H11C 0.9800 . ?
 C16 H16A 0.9900 . ?
 C16 H16B 0.9900 . ?
 C16 C17 1.489(2) . ?
 C17 H17A 0.9800 . ?
 C17 H17B 0.9800 . ?
 C17 H17C 0.9800 . ?

loop_
  _geom_angle_atom_site_label_1
  _geom_angle_atom_site_label_2
  _geom_angle_atom_site_label_3
  _geom_angle
  _geom_angle_site_symmetry_1
  _geom_angle_site_symmetry_3
  _geom_angle_publ_flag
 C13 O15 C16 116.03(10) . . ?
 C1 N7 H7 116.3 . . ?
 C8 N7 H7 116.3 . . ?
 C8 N7 C1 127.49(10) . . ?
 C2 C1 N7 123.22(11) . . ?
 C2 C1 C6 119.41(11) . . ?
 C6 C1 N7 117.36(10) . . ?
 C1 C2 H2 120.1 . . ?
 C3 C2 C1 119.82(11) . . ?
 C3 C2 H2 120.1 . . ?
 C2 C3 H3 119.5 . . ?
 C2 C3 C4 120.96(11) . . ?
 C4 C3 H3 119.5 . . ?
 C3 C4 C5 118.78(11) . . ?
 C3 C4 C13 119.29(11) . . ?
 C5 C4 C13 121.90(11) . . ?
 C4 C5 H5 119.7 . . ?
 C6 C5 C4 120.69(11) . . ?
 C6 C5 H5 119.7 . . ?
 C1 C6 H6 119.8 . . ?
 C5 C6 C1 120.34(11) . . ?
 C5 C6 H6 119.8 . . ?
 N7 C8 H8 118.1 . . ?
 N7 C8 C9 123.72(11) . . ?
 C9 C8 H8 118.1 . . ?
 C8 C9 H9 118.5 . . ?
 C8 C9 C10 123.09(11) . . ?
 C10 C9 H9 118.5 . . ?
 O12 C10 C9 122.26(11) . . ?
 O12 C10 C11 119.37(11) . . ?
 C9 C10 C11 118.35(11) . . ?
 C10 C11 H11A 109.5 . . ?
 C10 C11 H11B 109.5 . . ?
 C10 C11 H11C 109.5 . . ?
 H11A C11 H11B 109.5 . . ?
 H11A C11 H11C 109.5 . . ?
 H11B C11 H11C 109.5 . . ?
 O14 C13 O15 123.42(11) . . ?
 O14 C13 C4 124.35(12) . . ?
 O15 C13 C4 112.23(10) . . ?
 O15 C16 H16A 110.2 . . ?
 O15 C16 H16B 110.2 . . ?
 O15 C16 C17 107.77(11) . . ?
 H16A C16 H16B 108.5 . . ?
 C17 C16 H16A 110.2 . . ?
 C17 C16 H16B 110.2 . . ?
 C16 C17 H17A 109.5 . . ?
 C16 C17 H17B 109.5 . . ?
 C16 C17 H17C 109.5 . . ?
 H17A C17 H17B 109.5 . . ?
 H17A C17 H17C 109.5 . . ?
 H17B C17 H17C 109.5 . . ?

loop_
  _geom_torsion_atom_site_label_1
  _geom_torsion_atom_site_label_2
  _geom_torsion_atom_site_label_3
  _geom_torsion_atom_site_label_4
  _geom_torsion
  _geom_torsion_site_symmetry_1
  _geom_torsion_site_symmetry_2
  _geom_torsion_site_symmetry_3
  _geom_torsion_site_symmetry_4
  _geom_torsion_publ_flag
 N7 C1 C2 C3 -178.55(10) . . . . ?
 N7 C1 C6 C5 178.55(10) . . . . ?
 N7 C8 C9 C10 -1.25(18) . . . . ?
 C1 N7 C8 C9 175.39(10) . . . . ?
 C1 C2 C3 C4 0.19(17) . . . . ?
 C2 C1 C6 C5 -0.28(17) . . . . ?
 C2 C3 C4 C5 -0.52(17) . . . . ?
 C2 C3 C4 C13 177.41(10) . . . . ?
 C3 C4 C5 C6 0.45(17) . . . . ?
 C3 C4 C13 O14 -5.48(18) . . . . ?
 C3 C4 C13 O15 175.14(10) . . . . ?
 C4 C5 C6 C1 -0.05(17) . . . . ?
 C5 C4 C13 O14 172.38(12) . . . . ?
 C5 C4 C13 O15 -7.00(16) . . . . ?
 C6 C1 C2 C3 0.22(17) . . . . ?
 C8 N7 C1 C2 -6.21(18) . . . . ?
 C8 N7 C1 C6 175.00(10) . . . . ?
 C8 C9 C10 O12 4.96(18) . . . . ?
 C8 C9 C10 C11 -173.70(11) . . . . ?
 C13 O15 C16 C17 176.24(11) . . . . ?
 C13 C4 C5 C6 -177.42(10) . . . . ?
 C16 O15 C13 O14 -0.63(18) . . . . ?
 C16 O15 C13 C4 178.76(10) . . . . ?

_shelx_res_file
;
TITL dc369_0m_a.res in P2(1)/c
REM Old TITL DC369_0m in P21/c #14
REM SHELXT solution in P2(1)/c
REM R1 0.132, Rweak 0.002, Alpha 0.016, Orientation as input
REM Formula found by SHELXT: C13 N O3
CELL 1.54178 15.2021 5.4894 15.9041 90 113.345 90
ZERR 4 0.0011 0.0004 0.0012 0 0.001 0
LATT 1
SYMM -X,0.5+Y,0.5-Z
SFAC C H N O
UNIT 52 60 4 12

L.S. 10
PLAN  20
TEMP -153.15
BOND $H
LIST 6
MORE -1
CONF
fmap 2
acta
REM <olex2.extras>
REM <HklSrc "%./DC369_0m.hkl">
REM </olex2.extras>

WGHT    0.057000    0.486900
FVAR       0.72804
O12   4    0.620251    0.682880    0.553818    11.00000    0.03118    0.02512 =
         0.03491   -0.00431    0.01600   -0.00258
O14   4    0.147635    0.970619    0.738746    11.00000    0.03488    0.05152 =
         0.03970   -0.01567    0.02176   -0.00190
O15   4    0.110356    0.645216    0.645401    11.00000    0.02427    0.04115 =
         0.03014   -0.00568    0.01514   -0.00429
N7    3    0.499424    0.909761    0.611695    11.00000    0.02427    0.02100 =
         0.02054   -0.00144    0.00891    0.00065
AFIX  43
H7    2    0.510360    0.781215    0.584201    11.00000   -1.20000
AFIX   0
C1    1    0.416696    0.902539    0.629836    11.00000    0.02184    0.02376 =
         0.01650    0.00389    0.00553    0.00231
C2    1    0.393962    1.080991    0.680462    11.00000    0.02520    0.02429 =
         0.02047   -0.00069    0.00586   -0.00202
AFIX  43
H2    2    0.434829    1.217727    0.703314    11.00000   -1.20000
AFIX   0
C3    1    0.311446    1.058125    0.697337    11.00000    0.02951    0.02545 =
         0.01891   -0.00147    0.00831    0.00412
AFIX  43
H3    2    0.296164    1.180300    0.731672    11.00000   -1.20000
AFIX   0
C4    1    0.250709    0.858521    0.664632    11.00000    0.02227    0.02714 =
         0.01695    0.00217    0.00580    0.00365
C5    1    0.273805    0.681734    0.613674    11.00000    0.02353    0.02341 =
         0.02173   -0.00040    0.00744   -0.00101
AFIX  43
H5    2    0.232796    0.545354    0.590593    11.00000   -1.20000
AFIX   0
C6    1    0.355713    0.702992    0.596437    11.00000    0.02509    0.02261 =
         0.02307   -0.00072    0.01018    0.00136
AFIX  43
H6    2    0.370622    0.581262    0.561693    11.00000   -1.20000
AFIX   0
C8    1    0.564333    1.090826    0.631453    11.00000    0.02737    0.02387 =
         0.02073   -0.00148    0.00813   -0.00137
AFIX  43
H8    2    0.551990    1.236817    0.656969    11.00000   -1.20000
AFIX   0
C9    1    0.646342    1.076515    0.616976    11.00000    0.02560    0.02601 =
         0.02143   -0.00128    0.00745   -0.00368
AFIX  43
H9    2    0.687770    1.213795    0.631670    11.00000   -1.20000
AFIX   0
C10   1    0.673499    0.863312    0.580435    11.00000    0.02292    0.02671 =
         0.01760    0.00409    0.00658    0.00051
C11   1    0.770930    0.858582    0.576531    11.00000    0.02476    0.03801 =
         0.03298    0.00528    0.01256    0.00250
AFIX 137
H11A  2    0.813988    0.754711    0.625759    11.00000   -1.50000
H11B  2    0.796874    1.024342    0.584083    11.00000   -1.50000
H11C  2    0.765283    0.793617    0.517211    11.00000   -1.50000
AFIX   0
C13   1    0.165521    0.835522    0.687485    11.00000    0.02433    0.03340 =
         0.01982    0.00013    0.00693    0.00306
C16   1    0.026107    0.605536    0.665360    11.00000    0.02711    0.05678 =
         0.03682   -0.00547    0.01973   -0.00663
AFIX  23
H16A  2   -0.014112    0.754059    0.651117    11.00000   -1.20000
H16B  2    0.045411    0.566717    0.731052    11.00000   -1.20000
AFIX   0
C17   1   -0.028525    0.398467    0.607780    11.00000    0.02996    0.04891 =
         0.04122    0.00001    0.01871   -0.00629
AFIX 137
H17A  2   -0.048976    0.440782    0.542924    11.00000   -1.50000
H17B  2   -0.084969    0.364808    0.621159    11.00000   -1.50000
H17C  2    0.012418    0.253544    0.621365    11.00000   -1.50000
AFIX   0
HKLF 4

REM  dc369_0m_a.res in P2(1)/c
REM R1 =  0.0399 for    2208 Fo > 4sig(Fo)  and  0.0402 for all    2246 data
REM    156 parameters refined using      0 restraints

END

WGHT      0.0570      0.4869

REM Highest difference peak  0.236,  deepest hole -0.315,  1-sigma level  0.051
Q1    1   0.7879  0.6791  0.5709  11.00000  0.05    0.24
Q2    1   0.8212  0.9168  0.6377  11.00000  0.05    0.21
Q3    1  -0.0164  0.2659  0.5698  11.00000  0.05    0.20
Q4    1   0.7712  0.9545  0.5199  11.00000  0.05    0.16
Q5    1   0.4837  1.0846  0.6472  11.00000  0.05    0.15
Q6    1   0.1175  0.8130  0.7423  11.00000  0.05    0.14
Q7    1   0.0694  0.4451  0.7413  11.00000  0.05    0.13
Q8    1   0.3892  1.0279  0.6328  11.00000  0.05    0.12
Q9    1   0.0189  0.4454  0.6541  11.00000  0.05    0.12
Q10   1   0.2104  0.8512  0.6729  11.00000  0.05    0.12
Q11   1   0.2918  0.8964  0.7020  11.00000  0.05    0.12
Q12   1   0.7229  1.0573  0.7174  11.00000  0.05    0.11
Q13   1   0.1739  0.8478  0.7437  11.00000  0.05    0.11
Q14   1  -0.0729  0.5151  0.5481  11.00000  0.05    0.11
Q15   1   0.2792  0.7356  0.6692  11.00000  0.05    0.11
Q16   1   0.2493  0.8189  0.6212  11.00000  0.05    0.11
Q17   1   0.6415  1.0000  0.5727  11.00000  0.05    0.10
Q18   1   0.4911  1.0169  0.5275  11.00000  0.05    0.10
Q19   1   0.3698  0.6557  0.5188  11.00000  0.05    0.10
Q20   1   0.6233  1.0658  0.7429  11.00000  0.05    0.10
;
_shelx_res_checksum               83143
_shelx_hkl_file
;
   1   0   0 1361.96   40.40
  -1   0   0 1211.78   39.50
   2   0   0   70.69    2.10
   2   0   0   74.89    2.10
  -2   0   0   63.89    2.10
   3   0   0 1156.78   35.50
   3   0   0 1252.57   35.60
   4   0   0  576.64   17.40
   4   0   0  601.54   17.50
   5   0   0  209.28    6.10
   5   0   0  199.28    6.10
   6   0   0  234.38    7.10
   6   0   0  241.58    7.10
   7   0   0   35.90    1.20
   7   0   0   34.80    1.20
   8   0   0 1009.90   29.20
   8   0   0  973.40   29.20
   9   0   0   13.10    0.40
   9   0   0   13.40    0.50
  -9   0   0   12.90    0.50
   9   0   0   13.80    0.60
   9   0   0   13.00    0.60
  10   0   0   19.90    0.60
 -10   0   0   19.30    0.70
 -10   0   0   19.00    0.70
 -10   0   0   18.70    0.60
  10   0   0   20.40    0.90
  10   0   0   19.80    0.70
  11   0   0  112.79    3.30
 -11   0   0  110.39    3.40
 -11   0   0  107.59    3.40
  11   0   0  108.69    3.40
  11   0   0  112.89    3.60
 -11   0   0  112.09    3.30
  11   0   0  116.09    3.40
 -12   0   0   63.09    2.00
 -12   0   0   61.89    2.00
  12   0   0   65.89    2.00
  12   0   0   62.79    2.00
 -13   0   0   47.80    1.50
 -13   0   0   47.70    1.50
  13   0   0   47.60    1.50
  13   0   0   48.80    1.50
 -13   0   0   46.50    1.50
  14   0   0    6.30    0.30
 -14   0   0    6.70    0.30
  14   0   0    6.40    0.30
 -15   0   0  203.78    6.10
  15   0   0  214.28    6.10
  15   0   0  200.48    6.10
  16   0   0    2.20    0.20
 -16   0   0    2.00    0.10
  16   0   0    2.00    0.10
   0  -1   0    0.00    0.10
   0   1   0    0.00    0.10
   1  -1   0  945.11   26.50
   1  -1   0  877.31   26.40
   1  -1   0  876.61   26.50
  -1  -1   0  951.00   26.60
  -1  -1   0  906.51   26.50
   1   1   0  867.71   30.50
   1   1   0  858.01   26.30
   2  -1   0 1011.70   31.00
  -2  -1   0  981.70   31.10
   2  -1   0 1072.19   31.10
   2   1   0 1053.89   31.00
   2   1   0 1146.09   31.20
   3  -1   0  342.07   10.20
   3  -1   0  362.86   10.30
  -3  -1   0  331.27   10.20
   3   1   0  329.87   10.20
   3   1   0  363.86   10.20
   4  -1   0   42.10    1.30
   4  -1   0   44.70    1.30
   4   1   0   41.50    1.30
   4   1   0   42.00    1.40
   5  -1   0  131.09    4.00
   5  -1   0  135.79    4.00
   5   1   0  133.79    4.00
   5   1   0  131.29    4.00
   6  -1   0  356.26   10.80
   6  -1   0  377.16   10.80
   6   1   0  365.86   10.80
   6   1   0  357.36   10.80
   7  -1   0    2.80    0.30
   7  -1   0    2.90    0.30
   7   1   0    3.50    0.30
   7   1   0    2.80    0.30
   8  -1   0  119.49    3.70
   8  -1   0  124.49    3.90
   8  -1   0  127.49    3.80
   8   1   0  125.19    3.80
  -9  -1   0  184.38    5.60
   9  -1   0  196.08    5.80
   9  -1   0  192.78    5.60
   9  -1   0  189.08    5.80
   9   1   0  188.98    5.60
  -9   1   0  183.68    5.60
   9   1   0  193.28    5.80
  -9   1   0  181.78    5.60
  10  -1   0    1.90    0.30
 -10  -1   0    2.30    0.20
  10  -1   0    2.10    0.20
  10   1   0    1.90    0.40
 -10   1   0    2.10    0.20
 -10   1   0    2.00    0.20
 -10   1   0    2.60    0.20
  10   1   0    2.90    0.20
 -10   1   0    2.40    0.20
  10   1   0    2.20    0.20
  11  -1   0   88.69    3.00
  11  -1   0   95.79    2.80
 -11  -1   0   89.29    2.80
  11  -1   0   93.99    2.80
  11   1   0   87.19    3.00
  11   1   0   95.49    2.80
 -11   1   0   94.79    2.80
 -11   1   0   89.19    2.80
 -11   1   0   94.69    2.80
  11   1   0   89.59    2.80
 -11   1   0   92.09    2.80
  12  -1   0  638.64   19.20
 -12  -1   0  644.84   19.30
 -12   1   0  650.63   19.30
 -12   1   0  647.34   19.30
 -12   1   0  659.43   19.30
  12   1   0  676.43   19.30
  12   1   0  649.93   19.30
 -12   1   0  683.83   19.30
  13  -1   0    4.20    0.20
 -13  -1   0    4.50    0.30
  13  -1   0    5.20    0.30
  13   1   0    4.40    0.30
 -13   1   0    4.20    0.20
 -13   1   0    4.30    0.20
 -13   1   0    4.60    0.30
  13   1   0    4.40    0.30
  14  -1   0   19.80    0.70
 -14  -1   0   19.60    0.70
  14  -1   0   19.90    0.70
 -14   1   0   19.60    0.70
 -14   1   0   19.00    0.70
  14   1   0   20.10    0.70
  14   1   0   19.50    0.70
 -14   1   0   20.00    0.70
 -15  -1   0   73.79    2.20
  15  -1   0   73.99    2.20
  15  -1   0   71.09    2.20
 -15   1   0   70.79    2.20
  15   1   0   71.39    2.20
  15   1   0   75.99    2.20
 -16  -1   0   62.99    1.90
  16  -1   0   63.39    1.90
  16  -1   0   62.59    1.90
  16   1   0   65.49    1.90
  16   1   0   63.49    1.90
 -16   1   0   60.99    1.90
   0  -2   0   23.30    0.80
   0  -2   0   22.60    0.80
   0   2   0   22.90    0.80
  -1  -2   0    4.10    0.20
   1  -2   0    4.20    0.20
  -1  -2   0    4.20    0.20
   1  -2   0    4.30    0.20
   1   2   0    4.00    0.20
  -2  -2   0  222.98    6.20
   2  -2   0  201.58    6.20
   2  -2   0  213.28    6.20
   2  -2   0  200.18    6.10
   2   2   0  204.48    6.20
  -3  -2   0  174.68    5.00
   3  -2   0  164.28    4.90
   3  -2   0  168.38    5.00
   3   2   0  161.48    4.90
   4  -2   0    8.20    0.40
   4  -2   0    8.80    0.40
  -4  -2   0    8.20    0.40
   4   2   0    8.20    0.30
  -5  -2   0    5.60    0.30
   5  -2   0    5.50    0.30
   5  -2   0    5.80    0.30
   5   2   0    5.80    0.30
   6  -2   0   78.89    2.50
   6  -2   0   79.69    2.50
   6   2   0   78.69    2.40
   7  -2   0   70.99    2.20
   7  -2   0   74.69    2.30
   7  -2   0   72.69    2.30
  -7   2   0   77.79    2.30
   7   2   0   71.99    2.20
   7   2   0   71.29    2.30
   8  -2   0   64.79    2.10
   8  -2   0   66.79    1.90
  -8  -2   0   62.49    2.00
  -8   2   0   61.99    2.00
  -8   2   0   61.69    2.00
   8   2   0   65.69    2.00
   8   2   0   64.39    2.10
  -8   2   0   65.09    2.00
   8   2   0   64.29    2.00
  -8   2   0   63.39    1.90
  -8   2   0   64.79    1.90
  -9  -2   0    0.60    0.10
   9  -2   0    0.60    0.20
   9  -2   0    0.90    0.10
   9   2   0    0.70    0.10
  -9   2   0    0.90    0.10
  -9   2   0    0.70    0.10
   9   2   0    0.80    0.10
  -9   2   0    0.80    0.10
  -9   2   0    0.80    0.10
  10  -2   0    0.10    0.10
 -10  -2   0    0.00    0.10
  10  -2   0   -0.10    0.20
 -10   2   0    0.40    0.10
 -10   2   0    0.10    0.10
  10   2   0    0.10    0.10
  10   2   0    0.30    0.10
 -10   2   0    0.20    0.10
 -10   2   0    0.10    0.10
 -10   2   0    0.10    0.10
 -11  -2   0  255.17    7.60
  11  -2   0  253.77    7.60
 -11   2   0  264.97    7.60
 -11   2   0  250.57    7.60
  11   2   0  257.27    7.60
 -11   2   0  262.87    7.60
  11   2   0  253.87    7.60
 -11   2   0  264.37    7.60
  12  -2   0    8.20    0.40
  12  -2   0    8.00    0.30
 -12  -2   0    7.80    0.40
 -12   2   0    7.80    0.40
 -12   2   0    8.80    0.40
  12   2   0    7.70    0.40
 -12   2   0    8.30    0.30
 -12   2   0    8.10    0.40
 -12   2   0    8.90    0.40
  12   2   0    8.10    0.40
  13  -2   0    0.10    0.10
  13  -2   0    0.30    0.10
 -13  -2   0    0.20    0.10
 -13   2   0    0.40    0.10
  13   2   0    0.30    0.10
 -13   2   0    0.30    0.10
 -13   2   0    0.30    0.10
 -13   2   0    0.30    0.10
  13   2   0    0.30    0.10
  14  -2   0    7.00    0.30
  14  -2   0    7.00    0.30
 -14  -2   0    7.40    0.30
  14   2   0    7.30    0.30
 -14   2   0    7.10    0.30
 -14   2   0    7.50    0.30
  14   2   0    7.20    0.30
 -14   2   0    7.40    0.30
 -15  -2   0    0.20    0.10
  15  -2   0    0.30    0.10
  15  -2   0    0.30    0.10
  15   2   0    0.30    0.10
 -15   2   0    0.20    0.10
 -15   2   0    0.40    0.10
 -15   2   0    0.30    0.10
  15   2   0    0.30    0.10
 -16  -2   0    0.00    0.10
 -16   2   0    0.00    0.10
   0  -3   0    0.00    0.10
   1  -3   0   39.40    1.30
  -1  -3   0   37.90    1.30
   2  -3   0  116.69    3.60
  -2  -3   0  115.99    3.60
   3  -3   0  601.44   17.60
  -3  -3   0  580.94   17.60
  -3  -3   0  603.24   17.40
   4  -3   0  122.39    3.70
  -4  -3   0  129.19    3.70
   4  -3   0  125.09    3.90
  -4  -3   0  125.59    3.90
  -5  -3   0  135.39    4.30
  -5  -3   0  142.09    4.10
   5  -3   0  138.09    4.10
   5  -3   0  141.29    4.20
  -5   3   0  136.69    4.10
   5   3   0  135.09    4.10
  -6  -3   0   17.10    0.60
   6  -3   0   17.70    0.60
  -6   3   0   17.70    0.60
  -6   3   0   17.90    0.60
  -6   3   0   16.70    0.60
   6   3   0   18.90    0.70
   6   3   0   17.40    0.60
   6   3   0   17.10    0.60
  -6   3   0   17.90    0.60
   7  -3   0    1.10    0.10
  -7  -3   0    1.10    0.10
   7   3   0    0.90    0.10
   7   3   0    1.20    0.10
  -7   3   0    1.20    0.10
  -7   3   0    1.10    0.10
  -7   3   0    1.20    0.10
  -7   3   0    1.10    0.10
  -7   3   0    1.30    0.10
   8  -3   0   92.49    2.80
   8   3   0   93.49    2.80
  -8   3   0   89.39    2.80
  -8   3   0   92.99    2.80
  -8   3   0   92.59    2.80
  -8   3   0   94.99    2.80
   8   3   0   92.19    2.80
  -8   3   0   94.99    2.80
   9  -3   0  120.09    3.50
  -9  -3   0  115.09    3.50
  -9   3   0  121.09    3.50
  -9   3   0  121.49    3.50
  -9   3   0  116.29    3.50
   9   3   0  118.09    3.60
  -9   3   0  116.39    3.60
   9   3   0  115.29    3.50
  -9   3   0  117.89    3.50
  10  -3   0   61.39    1.80
 -10  -3   0   58.39    1.90
 -10   3   0   60.49    1.80
  10   3   0   61.99    1.90
 -10   3   0   60.09    1.90
 -10   3   0   58.69    1.80
  10   3   0   59.79    1.90
 -10   3   0   57.89    1.90
 -10   3   0   60.49    1.80
  11  -3   0   15.60    0.50
 -11  -3   0   15.00    0.60
 -11   3   0   15.30    0.60
 -11   3   0   15.10    0.60
 -11   3   0   15.70    0.60
  11   3   0   15.30    0.60
 -11   3   0   15.00    0.60
  11   3   0   15.30    0.60
 -11   3   0   15.70    0.60
  12  -3   0  196.88    5.90
 -12  -3   0  197.38    5.90
 -12   3   0  203.98    5.90
  12   3   0  197.18    5.90
  12   3   0  202.38    5.90
 -12   3   0  201.18    5.90
 -12   3   0  201.98    5.90
 -12   3   0  199.58    5.90
 -12   3   0  189.38    5.90
 -13  -3   0    0.70    0.10
  13  -3   0    0.70    0.10
  13  -3   0    0.70    0.10
  13   3   0    0.50    0.10
  13   3   0    0.70    0.10
 -13   3   0    0.60    0.10
 -13   3   0    0.70    0.10
 -13   3   0    0.90    0.10
 -13   3   0    0.80    0.10
 -13   3   0    0.60    0.10
  14  -3   0    0.10    0.10
 -14  -3   0    0.10    0.10
 -14   3   0    0.10    0.10
  14   3   0    0.10    0.10
 -14   3   0    0.00    0.10
 -14   3   0    0.10    0.10
  14   3   0    0.10    0.10
 -15   3   0   29.40    0.90
 -15   3   0   27.50    0.90
   0  -4   0 1201.38   33.50
   0   4   0 1114.59   33.60
   0   4   0 1148.79   33.50
   0   4   0 1122.79   33.50
   0   4   0 1144.89   33.50
   0   4   0 1138.19   33.60
  -1  -4   0   19.10    0.60
   1  -4   0   18.70    0.60
   1   4   0   18.20    0.60
   1   4   0   18.00    0.60
   1   4   0   18.60    0.60
  -1   4   0   19.40    0.70
   1   4   0   18.90    0.60
  -1   4   0   19.00    0.60
   1   4   0   18.00    0.70
  -1   4   0   18.30    0.60
  -1   4   0   18.80    0.60
  -1   4   0   21.90    0.70
   2  -4   0   12.50    0.40
  -2  -4   0   12.00    0.40
   2   4   0   11.60    0.40
  -2   4   0   11.80    0.40
   2   4   0   12.10    0.40
  -2   4   0   11.90    0.50
   2   4   0   11.60    0.40
   2   4   0   11.90    0.40
  -2   4   0   11.90    0.40
   2   4   0   11.20    0.50
  -2   4   0   12.30    0.40
  -2   4   0   12.40    0.40
   3  -4   0   10.80    0.40
  -3  -4   0   12.10    0.40
   3  -4   0   11.70    0.40
  -3   4   0   11.80    0.40
   3   4   0   11.20    0.50
  -3   4   0   11.50    0.40
  -3   4   0   11.50    0.40
  -3   4   0   11.30    0.40
  -3   4   0   11.80    0.40
   3   4   0   11.00    0.40
   3   4   0   11.20    0.40
   3   4   0   11.10    0.40
   3   4   0   11.90    0.40
   4  -4   0   33.10    1.00
  -4  -4   0   34.20    1.00
  -4   4   0   35.30    1.10
  -4   4   0   34.90    1.10
  -4   4   0   34.50    1.00
  -4   4   0   32.00    1.10
   4   4   0   33.20    1.10
   4   4   0   32.60    1.10
   4   4   0   31.70    1.00
   4   4   0   32.30    1.10
   5  -4   0    3.00    0.20
  -5  -4   0    3.20    0.20
  -5   4   0    2.80    0.20
  -5   4   0    3.40    0.20
  -5   4   0    3.30    0.20
   5   4   0    3.20    0.20
  -5   4   0    3.40    0.20
   5   4   0    3.20    0.20
   5   4   0    3.10    0.20
   5   4   0    3.10    0.20
  -6  -4   0   34.10    1.10
   6  -4   0   35.10    1.10
   6  -4   0   37.30    1.10
   6   4   0   36.30    1.20
  -6   4   0   35.80    1.10
  -6   4   0   35.80    1.10
  -6   4   0   36.00    1.10
  -6   4   0   35.40    1.10
   6   4   0   35.80    1.10
   7  -4   0    1.90    0.10
   7   4   0    1.40    0.10
   7   4   0    1.50    0.20
  -7   4   0    1.70    0.20
  -7   4   0    1.70    0.20
  -7   4   0    1.50    0.20
  -7   4   0    1.60    0.20
   7   4   0    1.70    0.20
   8  -4   0   22.60    0.70
   8   4   0   23.00    0.80
  -8   4   0   22.10    0.70
   8   4   0   22.50    0.80
  -8   4   0   21.90    0.70
  -8   4   0   21.40    0.80
  -8   4   0   22.50    0.80
   9  -4   0   23.30    0.80
  -9   4   0   23.30    0.80
   9   4   0   22.80    0.80
  -9   4   0   23.40    0.80
  -9   4   0   22.90    0.80
  -9   4   0   23.30    0.80
  -9   4   0   22.30    0.80
   9   4   0   23.50    0.80
  10  -4   0   10.30    0.40
  10   4   0    9.70    0.40
 -10   4   0    9.00    0.40
 -10   4   0    9.50    0.40
 -10   4   0    9.40    0.40
 -10   4   0    9.30    0.40
 -10   4   0    9.00    0.40
  10   4   0    9.40    0.40
  11  -4   0   32.70    1.00
  11   4   0   33.50    1.10
 -11   4   0   32.50    1.10
 -11   4   0   33.90    1.10
 -11   4   0   34.40    1.10
 -11   4   0   31.80    1.00
  11   4   0   34.30    1.10
 -11   4   0   33.10    1.10
  12  -4   0   44.10    1.30
  12  -4   0   43.30    1.40
 -12   4   0   44.50    1.40
  12   4   0   46.30    1.40
 -12   4   0   44.00    1.40
 -12   4   0   43.10    1.40
 -12   4   0   45.70    1.40
 -12   4   0   43.40    1.40
  12   4   0   44.20    1.40
 -13   4   0   36.80    1.20
  13   4   0   41.10    1.20
 -13   4   0   37.40    1.20
 -13   4   0   39.00    1.20
 -13   4   0   40.20    1.20
  13   4   0   38.50    1.20
   0  -5   0   -0.10    0.10
   0  -5   0    0.10    0.10
   0   5   0    0.40    0.10
   0   5   0   -0.20    0.10
   0   5   0    0.00    0.10
   0   5   0    0.00    0.10
   0   5   0   -0.20    0.10
   1  -5   0    4.10    0.20
   1  -5   0    3.30    0.30
  -1  -5   0    3.90    0.20
  -1  -5   0    3.60    0.30
  -1   5   0    3.70    0.20
   1   5   0    3.60    0.20
   1   5   0    3.80    0.20
  -1   5   0    4.10    0.30
  -1   5   0    3.60    0.30
   1   5   0    4.10    0.20
  -1   5   0    4.00    0.20
   1   5   0    3.40    0.30
  -1   5   0    4.10    0.20
  -2  -5   0   52.49    1.70
   2  -5   0   49.90    1.70
   2  -5   0   53.69    1.60
  -2  -5   0   53.19    1.60
   2   5   0   52.29    1.60
  -2   5   0   53.19    1.60
  -2   5   0   52.89    1.60
  -2   5   0   53.19    1.70
   2   5   0   53.59    1.70
   2   5   0   49.70    1.60
  -2   5   0   52.79    1.60
   2   5   0   52.39    1.60
  -2   5   0   52.69    1.60
   2   5   0   53.59    1.60
  -3  -5   0    7.40    0.30
   3  -5   0    7.80    0.30
   3  -5   0    7.50    0.40
  -3  -5   0    7.60    0.40
   3   5   0    7.20    0.30
  -3   5   0    7.30    0.40
   3   5   0    7.10    0.30
   3   5   0    7.60    0.30
  -3   5   0    7.50    0.30
   3   5   0    7.50    0.40
  -3   5   0    7.70    0.30
  -3   5   0    7.70    0.30
  -4  -5   0    5.50    0.30
   4  -5   0    5.60    0.30
  -4  -5   0    5.40    0.20
   4  -5   0    5.40    0.20
   4   5   0    5.40    0.30
   4   5   0    5.30    0.30
  -4   5   0    5.30    0.30
  -4   5   0    5.20    0.30
   4   5   0    5.70    0.30
  -4   5   0    5.60    0.30
  -4   5   0    5.60    0.30
   4   5   0    5.20    0.30
  -5  -5   0   25.00    0.90
   5  -5   0   23.90    0.80
   5  -5   0   25.00    0.80
  -5  -5   0   23.90    0.80
  -5   5   0   24.50    0.80
   5   5   0   25.00    0.80
  -5   5   0   24.80    0.80
   5   5   0   23.70    0.80
   5   5   0   25.10    0.90
  -5   5   0   24.80    0.80
  -5   5   0   25.10    0.80
   5   5   0   23.90    0.80
   6  -5   0   49.20    1.60
   6  -5   0   51.09    1.60
  -6  -5   0   51.29    1.60
  -6   5   0   51.99    1.60
   6   5   0   49.20    1.60
  -6   5   0   50.19    1.60
   6   5   0   53.19    1.60
  -6   5   0   51.49    1.60
   6   5   0   50.39    1.60
   7  -5   0   15.80    0.50
  -7  -5   0   15.10    0.60
   7   5   0   15.00    0.50
   7   5   0   15.60    0.60
  -7   5   0   15.60    0.50
   7   5   0   15.80    0.60
  -7   5   0   15.40    0.60
  -7   5   0   15.70    0.50
   8  -5   0   35.70    1.10
  -8  -5   0   33.00    1.10
  -8   5   0   34.70    1.10
   8   5   0   35.90    1.10
   8   5   0   34.90    1.10
  -8   5   0   35.60    1.10
   8   5   0   33.70    1.10
  -8   5   0   35.50    1.10
   9  -5   0    8.20    0.30
   9   5   0    8.50    0.30
  -9   5   0    8.10    0.30
  -9   5   0    8.20    0.30
   9   5   0    7.70    0.30
  -9   5   0    8.30    0.30
  10  -5   0   10.40    0.40
  10   5   0   10.10    0.40
 -10   5   0   10.00    0.40
 -10   5   0   10.40    0.40
 -10   5   0    9.80    0.40
  10   5   0   10.30    0.40
  11   5   0   18.40    0.60
   0  -6   0    8.00    0.40
   0  -6   0    8.40    0.30
   0  -6   0    8.90    0.30
   0   6   0    8.20    0.30
   0   6   0    8.30    0.30
   0   6   0    8.40    0.30
   0   6   0    8.40    0.30
   1  -6   0  102.49    3.00
  -1  -6   0  104.09    3.00
  -1  -6   0   99.19    3.00
  -1  -6   0   95.69    3.00
   1  -6   0   96.69    3.00
   1  -6   0   96.69    3.00
  -1   6   0  102.19    3.00
  -1   6   0   96.89    3.00
  -1   6   0   97.09    3.00
   1   6   0   95.79    3.00
   1   6   0   98.49    3.00
  -1   6   0  103.39    3.00
   1   6   0  100.49    3.00
   2  -6   0  175.88    5.50
  -2  -6   0  193.38    5.50
  -2  -6   0  194.08    5.60
   2  -6   0  196.18    5.50
   2  -6   0  189.48    5.50
  -2  -6   0  166.58    5.50
  -2   6   0  189.88    5.50
   2   6   0  191.58    5.50
  -2   6   0  182.78    5.50
   2   6   0  186.18    5.50
   2   6   0  189.88    5.50
  -2   6   0  183.48    5.50
  -2   6   0  189.08    5.50
  -3  -6   0    4.10    0.20
   3  -6   0    4.30    0.20
  -3  -6   0    4.50    0.30
   3  -6   0    4.20    0.20
  -3   6   0    4.20    0.20
   3   6   0    4.20    0.20
  -3   6   0    4.50    0.20
  -3   6   0    4.10    0.20
   3   6   0    4.30    0.20
  -3   6   0    4.50    0.20
   3   6   0    4.00    0.20
   4  -6   0    2.40    0.10
   4  -6   0    2.00    0.20
  -4  -6   0    1.90    0.10
  -4  -6   0    2.00    0.20
   4   6   0    2.00    0.10
   4   6   0    2.00    0.10
  -4   6   0    2.00    0.20
  -4   6   0    1.80    0.10
   4   6   0    2.00    0.20
  -4   6   0    2.00    0.20
  -5  -6   0    7.00    0.30
  -5  -6   0    6.90    0.30
   5  -6   0    7.40    0.30
   5  -6   0    7.20    0.30
  -5   6   0    7.00    0.30
  -5   6   0    7.30    0.30
   5   6   0    7.50    0.30
  -5   6   0    7.50    0.30
   5   6   0    7.10    0.30
  -6  -6   0    2.40    0.20
   6   6   0    2.20    0.20
  -6   6   0    2.40    0.20
  -6   6   0    2.30    0.10
   6   6   0    2.30    0.20
  -7   6   0    0.10    0.10
   7   6   0    0.10    0.10
  17   0  -1   -0.10    0.10
  16   0  -1    0.00    0.10
 -16   0   1    0.10    0.10
  16   0  -1    0.00    0.10
 -15   0   1    0.00    0.10
  15   0  -1    0.10    0.10
  15   0  -1    0.00    0.10
  14   0  -1    0.00    0.10
 -14   0   1    0.00    0.10
 -14   0   1    0.00    0.10
  14   0  -1    0.10    0.10
  13   0  -1    0.10    0.10
  13   0  -1    0.00    0.10
 -13   0   1    0.10    0.10
 -13   0   1    0.00    0.10
 -13   0   1    0.10    0.10
  12   0  -1   -0.10    0.10
 -12   0   1    0.10    0.10
 -12   0   1    0.10    0.10
  12   0  -1    0.00    0.10
 -12   0   1    0.00    0.10
  12   0  -1    0.10    0.10
  11   0  -1    0.00    0.10
 -11   0   1   -0.10    0.10
  11   0  -1    0.00    0.10
  11   0  -1    0.50    0.20
 -11   0   1    0.00    0.10
 -11   0   1    0.00    0.10
 -10   0   1    0.10    0.10
 -10   0   1    0.10    0.10
 -10   0   1    0.10    0.10
  10   0  -1    0.10    0.10
 -10   0   1    0.00    0.10
  10   0  -1    0.00    0.10
  10   0  -1    0.00    0.10
  10   0  -1    0.00    0.20
  -9   0   1    0.00    0.10
   9   0  -1    0.00    0.10
   9   0  -1   -0.10    0.20
   9   0  -1   -0.10    0.10
   9   0  -1    0.00    0.10
   8   0  -1    0.00    0.10
   8   0  -1    0.20    0.20
   7   0  -1    0.00    0.10
   7   0  -1    0.40    0.20
   6   0  -1    0.10    0.10
   6   0  -1    0.10    0.10
   5   0  -1    0.00    0.10
   5   0  -1    0.00    0.10
   4   0  -1   -1.80    0.10
   4   0  -1   -1.80    0.10
   3   0  -1   -2.10    0.10
   3   0  -1   -2.20    0.10
  -2   0   1   -0.20    0.10
   2   0  -1   -0.20    0.10
   1   0  -1   -1.00    0.10
   1   0  -1   -1.00    0.10
  -1   0   1   -1.00    0.10
   0   0   1   -1.00    0.10
   0   0   1   -1.00    0.10
   0   0  -1   -1.00    0.10
   1   0   1   -0.60    0.10
   1   0   1   -0.50    0.10
  -1   0  -1   -0.60    0.10
   2   0   1   -0.10    0.10
  -2   0  -1    0.00    0.10
   2   0   1    0.10    0.10
   3   0   1   -0.30    0.10
   3   0   1   -0.30    0.10
   4   0   1   -0.20    0.10
   4   0   1   -0.20    0.10
   5   0   1   -0.10    0.10
   5   0   1    0.20    0.10
   6   0   1   -0.10    0.10
   6   0   1    0.00    0.20
   7   0   1   -0.10    0.10
   7   0   1    0.00    0.10
   8   0   1    0.60    0.20
   9   0   1    0.00    0.20
   9   0   1    0.00    0.10
  -9   0  -1    0.00    0.10
   9   0   1    0.00    0.10
  10   0   1    0.00    0.20
 -10   0  -1    0.10    0.10
  10   0   1    0.10    0.10
 -10   0  -1    0.10    0.10
 -10   0  -1    0.00    0.10
  10   0   1    0.00    0.10
  10   0   1    0.10    0.10
 -11   0  -1    0.10    0.10
  11   0   1    0.20    0.10
 -11   0  -1    0.00    0.10
 -11   0  -1    0.00    0.10
  11   0   1    0.00    0.10
  11   0   1   -0.10    0.30
 -12   0  -1    0.00    0.10
 -12   0  -1    0.00    0.10
  12   0   1    0.00    0.10
 -12   0  -1    0.20    0.10
  12   0   1    0.10    0.10
  13   0   1    0.00    0.10
 -13   0  -1    0.10    0.10
 -13   0  -1    0.10    0.10
  13   0   1    0.10    0.10
  14   0   1    0.10    0.10
  14   0   1    0.00    0.10
 -14   0  -1    0.00    0.10
 -15   0  -1    0.10    0.10
  15   0   1    0.10    0.10
  15   0   1    0.00    0.10
 -16   0  -1    0.00    0.10
  16   0   1    0.10    0.10
  16  -1  -1   47.50    1.50
 -16  -1   1   49.80    1.50
  16  -1  -1   51.59    1.50
 -16   1   1   48.20    1.50
  16   1  -1   50.29    1.50
  16   1  -1   51.69    1.50
 -15  -1   1    2.80    0.20
  15  -1  -1    2.70    0.20
  15  -1  -1    2.70    0.20
  15   1  -1    2.70    0.20
 -15   1   1    2.50    0.20
  15   1  -1    2.60    0.20
 -15   1   1    2.90    0.20
 -15   1   1    2.60    0.20
 -14  -1   1   80.89    2.50
  14  -1  -1   76.99    2.40
  14  -1  -1   79.89    2.50
  14  -1  -1   82.39    2.50
 -14   1   1   81.09    2.40
  14   1  -1   79.19    2.40
  14   1  -1   79.69    2.50
 -14   1   1   80.39    2.40
 -14   1   1   81.79    2.50
 -13  -1   1   47.80    1.50
  13  -1  -1   47.60    1.50
  13  -1  -1   47.30    1.50
 -13   1   1   47.80    1.50
 -13   1   1   47.00    1.50
  13   1  -1   46.60    1.50
  13   1  -1   48.10    1.50
 -13   1   1   45.10    1.50
 -12  -1   1   17.80    0.70
  12  -1  -1   19.00    0.70
  12  -1  -1   18.50    0.60
 -12   1   1   18.40    0.70
 -12   1   1   18.90    0.70
 -12   1   1   17.50    0.60
  12   1  -1   18.60    0.70
 -12   1   1   19.50    0.60
 -12   1   1   18.80    0.60
 -12   1   1   17.80    0.60
  12   1  -1   19.20    0.70
  11  -1  -1  211.58    6.10
  11  -1  -1  209.68    6.10
 -11  -1   1  207.68    6.10
  11  -1  -1  202.78    6.30
 -11   1   1  202.98    6.10
 -11   1   1  199.28    6.10
  11   1  -1  205.68    6.10
 -11   1   1  204.98    6.10
 -11   1   1  197.98    6.10
 -11   1   1  214.78    6.10
  11   1  -1  213.48    6.10
 -11   1   1  208.48    6.10
  11   1  -1  207.18    6.30
 -10  -1   1   27.60    0.90
  10  -1  -1   29.40    0.90
  10  -1  -1   29.00    1.10
  10   1  -1   26.60    0.90
 -10   1   1   27.80    0.90
 -10   1   1   27.20    0.90
 -10   1   1   27.60    0.90
 -10   1   1   25.90    0.90
 -10   1   1   28.30    0.90
 -10   1   1   28.40    0.90
  10   1  -1   29.00    0.90
  10   1  -1   28.50    1.10
   9  -1  -1    1.30    0.20
   9  -1  -1    1.10    0.20
   9   1  -1    1.20    0.20
  -9   1   1    1.10    0.10
   9   1  -1    1.20    0.10
   9   1  -1    1.10    0.10
   8  -1  -1  399.66   11.60
   8  -1  -1  393.76   11.60
   8   1  -1  362.86   11.70
   8   1  -1  405.96   11.60
   7  -1  -1   27.50    1.00
   7  -1  -1   27.00    1.00
   7   1  -1   28.10    1.00
   7   1  -1   26.40    1.00
   6  -1  -1    1.20    0.20
   6  -1  -1    1.00    0.20
   6   1  -1    1.10    0.20
   5  -1  -1  311.67    9.10
   5  -1  -1  317.47    9.10
   5   1  -1  302.27    9.10
   5   1  -1  301.27    9.10
  -4  -1   1  134.79    4.10
   4  -1  -1  135.59    4.10
   4  -1  -1  142.29    4.10
   4   1  -1  132.49    4.10
   4   1  -1  142.89    4.10
   3  -1  -1  275.77    8.50
   3  -1  -1  290.37    8.50
  -3  -1   1  283.27    8.50
   3   1  -1  301.47    8.50
  -2  -1   1  101.69    3.20
  -2  -1   1  108.59    3.20
   2  -1  -1  103.69    3.10
   2  -1  -1  108.09    3.10
   2   1  -1  108.59    3.20
   2   1  -1  102.89    3.10
  -1  -1   1  891.61   26.10
  -1  -1   1  912.11   26.40
   1  -1  -1  890.01   26.10
   1  -1  -1  881.81   27.80
  -1  -1   1  895.91   26.30
   1  -1  -1  930.11   26.20
   1   1  -1  864.61   26.10
   1   1  -1  862.31   26.30
  -1   1   1  876.91   26.10
   0  -1  -1  959.90   26.90
   0  -1  -1  983.80   26.90
   0  -1   1  908.21   27.00
   0  -1   1  898.21   27.00
   0  -1   1  841.02   26.80
   0   1   1  860.71   26.80
   0   1   1  884.31   26.80
   0   1  -1  957.00   27.00
   1  -1   1 4890.51  147.59
   1  -1   1 4712.33  144.19
   1  -1   1 4818.02  147.39
  -1  -1  -1 4796.62  146.49
   1   1   1 4824.12  143.79
   1   1   1 4703.73  145.69
   2  -1   1  273.57    8.00
  -2  -1  -1  279.37    8.00
   2  -1   1  273.97    8.00
   2   1   1  286.17    8.00
   2   1   1  238.28    8.00
  -3  -1  -1  338.97   10.90
   3  -1   1  372.96   10.80
   3  -1   1  374.06   10.90
   3   1   1  365.46   10.80
   3   1   1  391.16   10.90
   4  -1   1  468.65   13.70
   4  -1   1  459.85   13.60
   4   1   1  453.55   13.60
   4   1   1  462.85   13.60
   5  -1   1  120.09    3.60
   5  -1   1  122.89    3.70
   5   1   1  119.99    3.60
   5   1   1  118.39    3.70
   6  -1   1   83.59    2.70
   6  -1   1   84.29    2.70
   6   1   1   89.39    2.70
   6   1   1   93.49    2.80
   7  -1   1   12.70    0.60
   7  -1   1   11.80    0.60
   7   1   1   12.90    0.60
   8  -1   1  945.91   28.60
   8  -1   1  990.20   28.60
   8  -1   1  947.31   28.40
   8   1   1  968.00   28.40
  -8   1  -1  948.11   28.40
   8   1   1 1019.70   28.60
   9  -1   1   31.70    1.20
   9  -1   1   34.40    1.20
  -9  -1  -1   32.40    1.10
   9  -1   1   34.30    1.00
  -9   1  -1   33.90    1.10
  -9   1  -1   32.30    1.10
   9   1   1   33.70    1.10
   9   1   1   33.10    1.20
   9   1   1   33.60    1.10
  -9   1  -1   32.80    1.00
  -9   1  -1   33.60    1.10
  10  -1   1   19.80    0.70
 -10  -1  -1   18.50    0.70
  10  -1   1   18.40    0.90
  10  -1   1   19.50    0.60
 -10   1  -1   18.30    0.70
  10   1   1   19.60    0.70
  10   1   1   18.70    0.70
  10   1   1   18.30    0.80
 -10   1  -1   18.80    0.60
 -10   1  -1   19.20    0.60
 -10   1  -1   19.50    0.60
  11  -1   1   65.09    2.00
  11  -1   1   68.19    2.00
 -11  -1  -1   61.99    2.00
 -11   1  -1   63.69    2.00
 -11   1  -1   67.59    2.00
  11   1   1   65.49    2.00
 -11   1  -1   63.29    2.00
  11   1   1   62.49    2.00
 -11   1  -1   65.39    2.00
  12  -1   1  880.21   27.30
 -12  -1  -1  939.11   27.40
  12  -1   1  975.30   27.40
  12   1   1  936.21   27.30
 -12   1  -1  940.91   27.30
 -12   1  -1  945.51   27.30
 -12   1  -1  903.31   27.30
  12   1   1  938.71   27.30
  13  -1   1   29.50    1.00
  13  -1   1   30.50    1.00
 -13  -1  -1   29.90    1.00
  13   1   1   29.80    1.00
  13   1   1   29.90    1.00
 -13   1  -1   29.00    1.00
 -13   1  -1   30.50    1.00
 -13   1  -1   28.30    0.90
 -14  -1  -1    6.50    0.30
  14  -1   1    6.70    0.30
  14  -1   1    6.30    0.30
 -14   1  -1    6.60    0.30
  14   1   1    6.50    0.30
  14   1   1    6.60    0.30
 -14   1  -1    6.20    0.30
  15  -1   1    0.10    0.10
  15  -1   1    0.10    0.10
 -15  -1  -1    0.10    0.10
  15   1   1    0.00    0.10
  15   1   1    0.00    0.10
 -15   1  -1    0.10    0.10
 -16  -1  -1    0.10    0.10
  16   1   1    0.20    0.10
  16  -2  -1    5.90    0.20
 -16  -2   1    5.60    0.20
  16   2  -1    5.20    0.20
 -16   2   1    5.40    0.20
  16   2  -1    6.10    0.20
 -16   2   1    5.50    0.20
 -15  -2   1    0.30    0.10
  15  -2  -1    0.20    0.10
  15  -2  -1    0.20    0.10
 -15   2   1    0.30    0.10
 -15   2   1    0.20    0.10
  15   2  -1    0.20    0.10
 -15   2   1    0.30    0.10
  15   2  -1    0.30    0.10
  14  -2  -1    1.30    0.10
  14  -2  -1    1.40    0.20
 -14  -2   1    1.50    0.20
 -14   2   1    1.40    0.10
  14   2  -1    1.40    0.10
 -14   2   1    1.40    0.10
 -14   2   1    1.10    0.10
  14   2  -1    1.30    0.10
 -14   2   1    1.40    0.10
  13  -2  -1   77.29    2.40
 -13  -2   1   79.49    2.40
  13  -2  -1   80.59    2.40
  13   2  -1   80.19    2.40
 -13   2   1   78.79    2.40
 -13   2   1   78.09    2.40
  13   2  -1   79.79    2.40
 -13   2   1   74.99    2.40
 -13   2   1   80.09    2.40
 -13   2   1   82.69    2.40
  12  -2  -1  298.87    8.70
 -12  -2   1  297.27    8.70
  12   2  -1  294.47    8.70
 -12   2   1  294.17    8.70
 -12   2   1  297.27    8.70
  12   2  -1  293.17    8.70
 -12   2   1  291.17    8.70
 -12   2   1  283.67    8.70
 -12   2   1  296.47    8.70
  11  -2  -1    0.80    0.10
 -11  -2   1    0.60    0.10
 -11   2   1    0.70    0.10
 -11   2   1    0.70    0.10
 -11   2   1    0.70    0.10
 -11   2   1    0.60    0.10
  11   2  -1    0.80    0.10
 -11   2   1    0.80    0.10
  11   2  -1    0.90    0.10
 -10  -2   1   27.20    0.90
  10  -2  -1   25.50    1.10
  10  -2  -1   27.10    0.90
  10   2  -1   27.10    0.90
 -10   2   1   27.20    0.90
 -10   2   1   27.10    0.90
 -10   2   1   25.90    0.90
 -10   2   1   27.30    0.90
 -10   2   1   27.20    0.90
  10   2  -1   27.90    0.90
   9  -2  -1   28.70    0.90
   9  -2  -1   26.20    1.00
  -9  -2   1   27.40    0.90
  -9   2   1   27.50    0.90
  -9   2   1   27.20    0.90
   9   2  -1   27.60    0.90
  -9   2   1   28.20    0.90
   9   2  -1   27.10    0.90
  -9   2   1   28.00    0.90
  -9   2   1   26.90    0.90
   8  -2  -1   45.70    1.60
   8  -2  -1   50.09    1.60
   8  -2  -1   48.80    1.40
   8   2  -1   48.20    1.60
  -8   2   1   45.70    1.50
   8   2  -1   47.10    1.50
   7  -2  -1   25.60    0.90
   7  -2  -1   24.90    0.90
  -6  -2   1   41.80    1.40
   6  -2  -1   40.80    1.40
   6  -2  -1   43.20    1.40
   6   2  -1   41.80    1.40
   5  -2  -1   94.09    2.80
  -5  -2   1   92.99    2.90
   5  -2  -1   92.79    2.80
   5   2  -1   91.59    2.80
  -4  -2   1 2993.00   85.99
   4  -2  -1 2834.52   85.39
   4  -2  -1 3062.49   85.69
   4   2  -1 2741.53   85.29
   3  -2  -1 1998.20   56.29
   3  -2  -1 1793.92   55.99
  -3  -2   1 2023.40   56.59
   3  -2  -1 1841.02   56.19
   3   2  -1 1894.51   56.29
   3   2  -1 1904.91   55.99
   2  -2  -1  183.98    5.60
   2  -2  -1  198.68    5.60
   2  -2  -1  181.98    5.50
  -2  -2   1  186.48    5.60
   2   2  -1  185.38    5.60
  -1  -2   1  437.26   12.60
   1  -2  -1  442.06   12.70
  -1  -2   1  414.56   12.60
   1   2  -1  416.06   12.60
   0  -2  -1   90.69    2.70
   0  -2   1   82.89    2.70
   0  -2  -1   92.79    2.70
   0  -2   1   92.79    2.70
   0   2  -1   86.89    2.70
   0   2   1   81.39    2.60
   1  -2   1   47.60    1.50
  -1  -2  -1   47.90    1.50
  -1  -2  -1   48.70    1.50
   1   2   1   41.40    1.40
   2  -2   1  706.93   21.40
  -2  -2  -1  765.32   21.80
   2  -2   1  751.42   21.70
   2   2   1  696.53   21.40
   3  -2   1  374.86   11.40
  -3  -2  -1  413.26   11.50
   3  -2   1  388.56   11.50
   3   2   1  375.36   11.40
   4  -2   1   14.70    0.60
  -4  -2  -1   15.30    0.60
   4  -2   1   15.30    0.60
   4   2   1   15.00    0.50
   5  -2   1    2.50    0.20
   5  -2   1    2.10    0.20
  -5  -2  -1    1.90    0.20
   5   2   1    2.10    0.20
   6  -2   1  112.29    3.40
   6  -2   1  113.49    3.50
   6  -2   1  110.09    3.30
  -6  -2  -1  113.89    3.50
   7  -2   1   71.69    2.10
   7  -2   1   69.59    2.30
   7  -2   1   70.59    2.20
  -7  -2  -1   64.89    2.10
   7   2   1   69.99    2.10
  -7   2  -1   70.19    2.10
   7   2   1   71.69    2.20
  -8  -2  -1   19.60    0.70
   8  -2   1   18.80    0.80
   8  -2   1   19.70    0.60
   8   2   1   19.60    0.80
   8   2   1   19.60    0.70
  -8   2  -1   19.10    0.70
  -8   2  -1   18.90    0.70
  -8   2  -1   20.10    0.60
  -8   2  -1   19.20    0.70
  -8   2  -1   19.50    0.60
   8   2   1   19.80    0.70
  -9  -2  -1  135.79    4.00
   9  -2   1  142.09    4.00
   9  -2   1  128.09    4.20
   9   2   1  133.19    4.00
  -9   2  -1  134.69    4.00
   9   2   1  133.89    4.00
  -9   2  -1  142.39    4.00
  -9   2  -1  131.99    4.00
  -9   2  -1  132.69    4.00
  -9   2  -1  135.49    4.00
 -10  -2  -1  328.87    9.90
  10  -2   1  336.37    9.90
 -10   2  -1  327.77    9.90
 -10   2  -1  315.77    9.90
 -10   2  -1  350.46    9.90
 -10   2  -1  325.07    9.90
 -10   2  -1  335.97    9.90
  10   2   1  344.77    9.90
  10   2   1  346.37    9.90
 -11  -2  -1  400.96   11.90
  11  -2   1  399.26   11.90
  11  -2   1  415.36   11.90
 -11   2  -1  405.16   11.90
 -11   2  -1  388.66   11.90
  11   2   1  393.86   11.90
 -11   2  -1  410.56   11.90
 -11   2  -1  418.16   11.90
 -12  -2  -1  245.98    7.20
  12  -2   1  250.77    7.20
  12  -2   1  235.28    7.20
 -12   2  -1  253.37    7.20
  12   2   1  240.18    7.20
  12   2   1  240.08    7.20
 -12   2  -1  245.88    7.20
 -12   2  -1  243.58    7.20
 -12   2  -1  239.38    7.20
 -13  -2  -1    5.80    0.30
  13  -2   1    5.90    0.30
 -13   2  -1    5.50    0.30
  13   2   1    6.20    0.30
 -13   2  -1    5.80    0.30
 -13   2  -1    6.00    0.30
  13   2   1    5.60    0.30
  14  -2   1    1.90    0.20
  14  -2   1    2.00    0.20
 -14  -2  -1    2.10    0.20
 -14   2  -1    1.80    0.10
 -14   2  -1    2.00    0.20
  14   2   1    2.10    0.20
 -14   2  -1    1.90    0.20
  14   2   1    2.00    0.20
  15  -2   1    2.00    0.20
  15  -2   1    2.50    0.10
 -15  -2  -1    2.70    0.20
  15   2   1    2.60    0.10
 -15   2  -1    2.40    0.10
  15   2   1    2.50    0.20
 -15   2  -1    2.60    0.20
 -15  -3   1    8.30    0.30
  15  -3  -1    7.60    0.30
  15  -3  -1    8.30    0.30
 -15   3   1    8.00    0.30
  15   3  -1    7.30    0.30
  15   3  -1    8.40    0.30
 -15   3   1    8.10    0.30
 -15   3   1    8.20    0.30
 -14  -3   1    0.20    0.10
  14  -3  -1    0.30    0.10
  14  -3  -1    0.10    0.10
 -14   3   1    0.40    0.10
 -14   3   1    0.10    0.10
 -14   3   1    0.20    0.10
 -14   3   1    0.20    0.10
  14   3  -1    0.30    0.10
  14   3  -1    0.20    0.10
 -14   3   1    0.20    0.10
 -13  -3   1   68.49    2.10
  13  -3  -1   69.59    2.10
  13  -3  -1   68.09    2.10
  13   3  -1   68.19    2.10
 -13   3   1   66.69    2.10
 -13   3   1   70.89    2.10
 -13   3   1   68.29    2.10
 -13   3   1   70.49    2.10
 -13   3   1   71.39    2.10
  13   3  -1   68.89    2.10
 -12  -3   1   98.39    3.00
  12   3  -1  101.89    3.00
 -12   3   1  101.99    3.00
 -12   3   1   98.49    3.00
 -12   3   1   96.69    3.00
 -12   3   1  102.59    3.00
 -12   3   1  100.09    3.00
  12   3  -1  101.99    3.00
 -11  -3   1  266.97    8.10
  11  -3  -1  274.37    8.10
 -11   3   1  269.47    8.10
 -11   3   1  274.27    8.10
 -11   3   1  275.47    8.10
 -11   3   1  272.87    8.10
  11   3  -1  277.67    8.10
 -11   3   1  273.27    8.10
  11   3  -1  271.37    8.10
 -10  -3   1  141.79    4.50
  10  -3  -1  149.69    4.40
  10   3  -1  147.79    4.50
 -10   3   1  150.88    4.50
 -10   3   1  149.49    4.50
 -10   3   1  154.48    4.50
 -10   3   1  148.79    4.50
  10   3  -1  151.58    4.50
 -10   3   1  152.08    4.50
  -9  -3   1   31.40    1.00
   9  -3  -1   32.10    1.00
  -9   3   1   31.10    1.00
  -9   3   1   32.20    1.00
   9   3  -1   31.80    1.00
  -9   3   1   31.70    1.00
  -9   3   1   31.80    1.00
   9   3  -1   32.30    1.00
  -9   3   1   32.70    1.10
   8  -3  -1   56.79    1.70
   8   3  -1   55.59    1.70
  -8   3   1   55.49    1.70
   8   3  -1   54.39    1.70
  -8   3   1   56.09    1.70
  -8   3   1   55.49    1.70
  -8   3   1   54.69    1.70
  -8   3   1   57.39    1.70
   7  -3  -1    0.00    0.10
   7   3  -1    0.10    0.10
   7   3  -1    0.00    0.10
  -7   3   1    0.30    0.10
  -7   3   1    0.10    0.10
  -7   3   1    0.00    0.10
  -7   3   1    0.00    0.10
  -7   3   1    0.10    0.10
  -6  -3   1  195.18    5.70
   6  -3  -1  194.18    5.70
   6   3  -1  184.58    5.70
  -6   3   1  190.48    5.70
   6   3  -1  187.28    5.70
  -6   3   1  197.38    5.70
  -6   3   1  198.68    5.70
  -5  -3   1   43.80    1.30
   5  -3  -1   44.20    1.50
   5  -3  -1   42.40    1.30
  -5  -3   1   43.60    1.50
   5   3  -1   43.80    1.40
  -5   3   1   45.50    1.30
  -4  -3   1   44.50    1.30
  -4  -3   1   44.30    1.50
   4  -3  -1   44.30    1.50
  -3  -3   1  310.37    9.30
   3  -3  -1  309.37    9.30
  -3  -3   1  315.17    9.20
   2  -3  -1  173.08    5.20
  -2  -3   1  175.48    5.30
  -1  -3   1   97.99    3.10
   1  -3  -1   99.79    3.00
   0  -3   1  123.59    3.80
   0  -3  -1  124.39    3.80
   1  -3   1  110.49    3.40
  -1  -3  -1  112.79    3.40
   2  -3   1    1.60    0.20
  -2  -3  -1    2.00    0.20
   3  -3   1   57.39    1.90
  -3  -3  -1   61.49    2.00
   3  -3   1   57.79    1.80
  -3  -3  -1   61.99    1.80
  -4  -3  -1  708.43   21.60
   4  -3   1  736.33   21.40
   4  -3   1  723.13   21.50
  -4  -3  -1  759.92   21.40
   4   3   1  727.93   21.40
  -4   3  -1  721.13   21.40
  -5  -3  -1   42.00    1.20
   5  -3   1   40.20    1.20
  -5  -3  -1   38.20    1.40
   5  -3   1   39.80    1.40
  -5   3  -1   39.00    1.20
   5   3   1   39.40    1.30
   5   3   1   46.70    1.40
  -5   3  -1   38.10    1.30
  -6  -3  -1  130.69    4.00
   6  -3   1  135.09    4.00
   6   3   1  134.59    4.00
  -6   3  -1  131.39    4.00
  -6   3  -1  132.59    4.00
   6   3   1  138.69    4.00
   6   3   1  131.89    4.00
  -6   3  -1  136.69    4.00
  -6   3  -1  133.79    4.00
  -6   3  -1  134.09    4.00
  -7  -3  -1    0.20    0.10
   7  -3   1    0.00    0.10
  -7   3  -1    0.10    0.10
  -7   3  -1    0.00    0.10
   7   3   1    0.00    0.10
   7   3   1    0.10    0.10
  -7   3  -1    0.30    0.10
  -7   3  -1    0.10    0.10
  -7   3  -1    0.10    0.10
   8  -3   1  172.48    5.10
  -8  -3  -1  168.28    5.10
  -8   3  -1  175.98    5.10
  -8   3  -1  173.88    5.10
   8   3   1  172.18    5.10
  -8   3  -1  169.28    5.10
   8   3   1  175.48    5.10
  -8   3  -1  169.08    5.20
  -8   3  -1  176.78    5.10
   9  -3   1   43.40    1.30
   9   3   1   42.50    1.40
  -9   3  -1   41.40    1.30
   9   3   1   42.60    1.30
  -9   3  -1   42.90    1.30
  -9   3  -1   42.50    1.30
  -9   3  -1   42.10    1.30
  -9   3  -1   41.10    1.30
 -10  -3  -1   11.30    0.50
  10  -3   1   11.60    0.40
  10   3   1   11.80    0.50
 -10   3  -1   11.80    0.40
 -10   3  -1   12.10    0.40
 -10   3  -1   11.20    0.40
  10   3   1   11.50    0.50
 -10   3  -1   10.90    0.40
 -10   3  -1   10.90    0.50
  11  -3   1   38.00    1.20
 -11  -3  -1   38.20    1.20
 -11   3  -1   38.30    1.20
 -11   3  -1   38.50    1.20
 -11   3  -1   37.90    1.20
 -11   3  -1   36.90    1.20
  11   3   1   38.60    1.20
  11   3   1   38.40    1.20
 -11   3  -1   38.20    1.20
 -12  -3  -1  122.19    3.70
  12  -3   1  123.19    3.70
  12  -3   1  125.29    3.70
  12   3   1  124.09    3.70
 -12   3  -1  127.19    3.70
 -12   3  -1  117.39    3.70
  12   3   1  124.69    3.70
 -12   3  -1  123.19    3.70
 -12   3  -1  126.19    3.70
 -12   3  -1  123.59    3.70
 -13  -3  -1    0.10    0.10
  13  -3   1    0.10    0.10
  13   3   1    0.00    0.10
 -13   3  -1    0.10    0.10
  13   3   1    0.00    0.10
 -13   3  -1    0.00    0.10
 -13   3  -1    0.20    0.10
 -13   3  -1    0.00    0.10
 -14  -3  -1   11.10    0.40
 -14   3  -1   10.80    0.40
  14   3   1   11.00    0.40
 -14   3  -1   10.80    0.40
  14   3   1   10.60    0.40
  13  -4  -1    7.40    0.30
 -13   4   1    8.10    0.30
  13   4  -1    8.20    0.30
 -13   4   1    7.60    0.30
 -13   4   1    7.90    0.30
  13   4  -1    7.80    0.30
 -13   4   1    7.40    0.30
 -13   4   1    7.70    0.30
  12  -4  -1  124.89    3.60
  12   4  -1  120.29    3.60
 -12   4   1  121.09    3.60
 -12   4   1  121.69    3.60
  12   4  -1  126.69    3.60
 -12   4   1  118.29    3.60
 -12   4   1  115.99    3.60
 -12   4   1  119.59    3.60
  11  -4  -1  108.59    3.20
 -11   4   1  108.99    3.20
 -11   4   1  108.49    3.20
  11   4  -1  110.09    3.20
 -11   4   1  107.99    3.30
 -11   4   1  105.49    3.20
  11   4  -1  105.99    3.20
 -11   4   1  106.69    3.20
  10  -4  -1    5.30    0.20
 -10   4   1    4.90    0.30
 -10   4   1    5.10    0.30
 -10   4   1    4.90    0.20
  10   4  -1    5.40    0.30
  10   4  -1    5.30    0.30
 -10   4   1    5.10    0.30
 -10   4   1    5.30    0.30
   9  -4  -1   10.30    0.40
   9   4  -1   10.30    0.40
  -9   4   1   10.20    0.40
   9   4  -1   10.50    0.40
  -9   4   1   10.40    0.40
  -9   4   1   10.30    0.40
  -9   4   1   11.60    0.40
   8  -4  -1  247.78    7.10
  -8  -4   1  223.48    7.20
  -8   4   1  244.48    7.20
  -8   4   1  248.28    7.20
   8   4  -1  237.58    7.20
  -8   4   1  246.48    7.20
   8   4  -1  246.48    7.20
  -8   4   1  241.38    7.20
   7  -4  -1    0.20    0.10
   7   4  -1    0.20    0.10
   7   4  -1    0.20    0.10
  -7   4   1    0.00    0.10
   7   4  -1    0.20    0.10
  -7   4   1    0.10    0.10
  -7   4   1    0.10    0.10
  -7   4   1    0.10    0.10
   6  -4  -1   60.39    1.80
   6  -4  -1   55.39    1.80
  -6  -4   1   58.39    1.80
   6   4  -1   59.29    1.80
   6   4  -1   56.99    1.80
  -6   4   1   57.19    1.80
  -6   4   1   59.59    1.80
  -6   4   1   58.19    1.80
  -6   4   1   60.69    1.80
   6   4  -1   59.29    1.80
  -5  -4   1   68.79    2.00
   5  -4  -1   67.69    2.00
  -5   4   1   69.59    2.10
   5   4  -1   65.49    2.10
   5   4  -1   68.19    2.10
   5   4  -1   67.79    2.10
  -5   4   1   68.39    2.10
  -5   4   1   68.89    2.10
  -5   4   1   65.99    2.00
   5   4  -1   64.29    2.00
   4  -4  -1    2.00    0.10
  -4  -4   1    1.80    0.10
  -4   4   1    1.80    0.20
  -4   4   1    2.40    0.20
   4   4  -1    1.90    0.20
   4   4  -1    1.90    0.20
   4   4  -1    1.70    0.20
  -4   4   1    2.20    0.20
   4   4  -1    1.60    0.20
   4   4  -1    2.30    0.20
   3  -4  -1   13.70    0.50
  -3  -4   1   13.60    0.50
   3   4  -1   13.50    0.50
  -3   4   1   13.20    0.50
  -3   4   1   13.30    0.50
   3   4  -1   13.20    0.50
  -3   4   1   14.10    0.50
  -3   4   1   13.90    0.50
   3   4  -1   13.80    0.50
   3   4  -1   12.80    0.50
   3   4  -1   13.20    0.50
  -3   4   1   14.30    0.50
  -2  -4   1   54.79    1.70
   2  -4  -1   55.89    1.60
  -2   4   1   54.29    1.70
  -2   4   1   53.59    1.70
   2   4  -1   53.49    1.70
   2   4  -1   52.89    1.70
  -2   4   1   53.89    1.70
   2   4  -1   54.89    1.70
  -2   4   1   57.19    1.70
   2   4  -1   53.99    1.70
   2   4  -1   54.19    1.70
  -2   4   1   54.69    1.70
   1  -4  -1    4.10    0.20
  -1  -4   1    4.30    0.20
  -1   4   1    4.10    0.20
   1   4  -1    4.00    0.20
   1   4  -1    4.10    0.20
  -1   4   1    4.10    0.20
  -1   4   1    4.10    0.20
  -1   4   1    3.90    0.20
   1   4  -1    4.00    0.20
   1   4  -1    4.00    0.20
   1   4  -1    3.80    0.20
  -1   4   1    4.20    0.20
   0  -4   1    0.40    0.10
   0  -4  -1    0.30    0.10
   0   4  -1    0.40    0.10
   0   4   1    0.20    0.10
   0   4  -1    0.30    0.10
   0   4  -1    0.30    0.10
   0   4   1    0.20    0.10
   0   4   1    0.40    0.10
   0   4   1    0.30    0.10
   0   4   1    0.40    0.10
   0   4  -1    0.50    0.10
   0   4  -1    0.30    0.10
   1  -4   1   41.30    1.20
  -1  -4  -1   41.40    1.20
   1  -4   1   40.30    1.30
  -1   4  -1   42.00    1.20
   1   4   1   39.00    1.20
  -1   4  -1   39.00    1.30
   1   4   1   37.70    1.20
   1   4   1   37.40    1.30
  -1   4  -1   41.00    1.30
  -1   4  -1   37.80    1.20
   1   4   1   42.40    1.20
  -1   4  -1   39.00    1.20
   1   4   1   37.10    1.20
   2  -4   1    9.60    0.30
  -2  -4  -1    9.20    0.30
   2  -4   1    8.90    0.40
   2   4   1    9.60    0.40
  -2   4  -1    9.60    0.40
   2   4   1    9.70    0.40
   2   4   1    9.00    0.30
  -2   4  -1    9.40    0.40
  -2   4  -1    9.10    0.40
  -2   4  -1    9.50    0.40
  -2   4  -1    9.30    0.40
   2   4   1    9.40    0.40
   3  -4   1   71.59    2.10
   3  -4   1   64.29    2.10
  -3   4  -1   70.09    2.10
   3   4   1   64.79    2.10
   3   4   1   69.09    2.10
  -3   4  -1   67.09    2.10
  -3   4  -1   70.99    2.10
   3   4   1   67.79    2.10
  -3   4  -1   69.49    2.10
   3   4   1   71.19    2.10
  -3   4  -1   68.49    2.10
  -4  -4  -1    4.70    0.20
   4  -4   1    4.00    0.20
  -4   4  -1    4.10    0.20
  -4   4  -1    5.40    0.30
  -4   4  -1    3.90    0.20
   4   4   1    4.00    0.20
   4   4   1    4.90    0.20
   4   4   1    4.10    0.20
  -4   4  -1    3.90    0.20
   4   4   1    4.70    0.30
  -5  -4  -1   20.90    0.60
   5  -4   1   19.80    0.60
   5  -4   1   18.00    0.60
  -5   4  -1   19.60    0.60
   5   4   1   18.60    0.70
   5   4   1   18.00    0.60
  -5   4  -1   19.00    0.60
   5   4   1   19.40    0.70
  -5   4  -1   19.60    0.70
  -5   4  -1   19.00    0.70
  -5   4  -1   19.20    0.60
   5   4   1   19.50    0.70
  -6  -4  -1   79.69    2.50
   6  -4   1   85.39    2.50
   6   4   1   83.69    2.50
  -6   4  -1   80.49    2.50
  -6   4  -1   85.69    2.50
  -6   4  -1   81.09    2.50
   6   4   1   81.79    2.50
  -6   4  -1   84.19    2.50
   6   4   1   80.59    2.50
  -6   4  -1   84.99    2.50
   7  -4   1    0.40    0.10
  -7  -4  -1    0.40    0.10
   7   4   1    0.50    0.10
  -7   4  -1    0.60    0.10
  -7   4  -1    0.70    0.10
   7   4   1    0.40    0.10
  -7   4  -1    0.50    0.10
   7   4   1    0.50    0.10
  -7   4  -1    0.50    0.10
   8  -4   1    0.20    0.10
   8   4   1    0.10    0.10
  -8   4  -1    0.10    0.10
  -8   4  -1    0.30    0.10
  -8   4  -1    0.20    0.10
  -8   4  -1    0.00    0.10
  -8   4  -1    0.40    0.10
   8   4   1    0.10    0.10
   9  -4   1   14.00    0.50
  -9   4  -1   13.30    0.50
  -9   4  -1   13.90    0.50
  -9   4  -1   14.30    0.50
  -9   4  -1   13.80    0.50
   9   4   1   13.70    0.50
   9   4   1   13.70    0.50
  -9   4  -1   13.50    0.50
  10  -4   1   21.30    0.70
  10   4   1   22.70    0.70
  10   4   1   21.60    0.70
 -10   4  -1   20.90    0.70
 -10   4  -1   21.20    0.70
 -10   4  -1   21.50    0.70
 -10   4  -1   22.40    0.70
 -10   4  -1   22.10    0.70
  11  -4   1   30.00    0.90
 -11   4  -1   30.40    1.00
  11   4   1   31.20    1.00
  11   4   1   29.70    1.00
 -11   4  -1   29.40    1.00
 -11   4  -1   30.40    1.00
 -11   4  -1   29.70    1.00
 -11   4  -1   30.50    1.00
  12  -4   1   41.30    1.30
 -12   4  -1   44.00    1.30
  12   4   1   43.80    1.30
 -12   4  -1   41.20    1.30
 -12   4  -1   43.40    1.30
 -12   4  -1   43.00    1.30
  12   4   1   42.40    1.30
 -12   4  -1   41.60    1.30
 -13   4  -1   83.79    2.50
  11   5  -1   12.90    0.40
 -11   5   1   12.60    0.40
 -11   5   1   12.10    0.40
  10  -5  -1    1.50    0.10
 -10   5   1    1.40    0.10
 -10   5   1    1.60    0.10
  10   5  -1    1.60    0.10
  10   5  -1    1.50    0.10
 -10   5   1    1.50    0.10
   9  -5  -1   34.80    1.10
   9   5  -1   35.00    1.10
  -9   5   1   33.20    1.10
  -9   5   1   33.00    1.10
  -9   5   1   34.50    1.10
   9   5  -1   33.10    1.10
   8  -5  -1   48.50    1.50
  -8  -5   1   46.50    1.50
  -8   5   1   47.60    1.50
  -8   5   1   47.50    1.50
   8   5  -1   49.30    1.50
   8   5  -1   45.00    1.50
  -8   5   1   49.00    1.50
   7  -5  -1   84.39    2.60
  -7  -5   1   84.29    2.60
  -7   5   1   85.79    2.60
   7   5  -1   81.39    2.60
   7   5  -1   84.19    2.60
  -7   5   1   87.09    2.60
  -7   5   1   86.39    2.60
   7   5  -1   91.39    2.60
   6  -5  -1    0.40    0.10
   6  -5  -1    0.20    0.10
  -6  -5   1    0.50    0.10
   6   5  -1    0.30    0.10
  -6   5   1    0.60    0.10
  -6   5   1    0.30    0.10
  -6   5   1    0.60    0.10
  -6   5   1    0.60    0.10
   6   5  -1    0.30    0.10
   6   5  -1    0.40    0.10
  -5  -5   1   25.90    0.90
   5  -5  -1   25.50    0.80
   5  -5  -1   25.40    0.80
  -5  -5   1   24.30    0.80
  -5   5   1   25.70    0.80
   5   5  -1   25.70    0.80
   5   5  -1   25.20    0.90
   5   5  -1   25.60    0.80
  -5   5   1   26.90    0.90
  -5   5   1   26.40    0.90
  -5   5   1   25.40    0.80
   5   5  -1   26.90    0.90
  -4  -5   1   12.30    0.50
  -4  -5   1   11.20    0.40
   4  -5  -1   12.50    0.40
  -4   5   1   11.70    0.50
  -4   5   1   11.80    0.40
   4   5  -1   12.00    0.50
   4   5  -1   11.60    0.40
   4   5  -1   11.50    0.40
  -4   5   1   12.10    0.50
   4   5  -1   11.90    0.40
   4   5  -1   11.70    0.50
  -4   5   1   12.10    0.40
  -3  -5   1    5.00    0.20
   3  -5  -1    4.80    0.20
  -3  -5   1    5.20    0.30
   3  -5  -1    5.00    0.30
  -3   5   1    5.10    0.30
  -3   5   1    5.00    0.30
  -3   5   1    5.20    0.20
   3   5  -1    4.70    0.30
  -3   5   1    4.80    0.30
   3   5  -1    5.00    0.30
   3   5  -1    5.10    0.20
   3   5  -1    4.70    0.20
  -3   5   1    4.90    0.30
   3   5  -1    4.70    0.30
  -2  -5   1   54.49    1.70
  -2  -5   1   54.19    1.70
   2  -5  -1   55.69    1.70
   2  -5  -1   54.89    1.70
  -2   5   1   55.09    1.70
  -2   5   1   55.69    1.70
   2   5  -1   53.59    1.70
   2   5  -1   54.99    1.70
  -2   5   1   54.79    1.70
   2   5  -1   52.19    1.70
   2   5  -1   55.59    1.70
  -2   5   1   55.59    1.70
   2   5  -1   55.59    1.70
  -2   5   1   56.09    1.70
  -1  -5   1  332.07    9.70
   1  -5  -1  326.07    9.60
   1  -5  -1  325.07    9.70
  -1  -5   1  330.27    9.60
  -1   5   1  325.07    9.70
   1   5  -1  322.17    9.60
  -1   5   1  328.37    9.70
  -1   5   1  317.87    9.70
  -1   5   1  328.67    9.60
   1   5  -1  326.47    9.70
   1   5  -1  325.87    9.60
   1   5  -1  321.27    9.70
   1   5  -1  326.47    9.70
  -1   5   1  341.97    9.70
   0  -5   1  354.96   10.50
   0  -5   1  359.56   10.50
   0  -5  -1  367.06   10.50
   0   5  -1  349.87   10.50
   0   5  -1  352.76   10.50
   0   5  -1  357.66   10.50
   0   5  -1  362.76   10.50
   0   5   1  360.16   10.50
   0   5   1  367.16   10.50
   0   5   1  354.26   10.50
   0   5   1  341.97   10.50
   0   5  -1  338.17   10.50
   0   5   1  355.56   10.50
  -1  -5  -1  394.06   11.30
   1  -5   1  388.26   11.30
   1  -5   1  381.36   11.40
   1   5   1  375.76   11.40
  -1   5  -1  392.66   11.30
  -1   5  -1  383.16   11.40
  -1   5  -1  388.56   11.30
   1   5   1  384.16   11.30
  -1   5  -1  385.26   11.40
  -1   5  -1  383.86   11.40
   1   5   1  373.56   11.50
   1   5   1  391.96   11.40
   1   5   1  386.66   11.40
  -2  -5  -1   26.30    0.80
   2  -5   1   23.50    0.90
   2  -5   1   26.30    0.80
  -2   5  -1   25.10    0.90
   2   5   1   24.60    0.80
   2   5   1   25.40    0.90
  -2   5  -1   25.70    0.80
  -2   5  -1   26.10    0.80
  -2   5  -1   25.00    0.80
   2   5   1   25.00    0.90
   2   5   1   25.70    0.80
   3  -5   1   35.80    1.10
  -3  -5  -1   36.30    1.10
   3  -5   1   35.50    1.10
   3  -5   1   34.30    1.20
  -3   5  -1   35.30    1.10
   3   5   1   34.90    1.10
  -3   5  -1   34.90    1.10
  -3   5  -1   36.70    1.10
  -3   5  -1   36.80    1.20
   3   5   1   35.40    1.20
   3   5   1   36.10    1.10
   3   5   1   35.60    1.20
   4  -5   1   75.49    2.30
   4  -5   1   70.89    2.30
  -4  -5  -1   75.59    2.30
   4   5   1   73.69    2.30
  -4   5  -1   77.69    2.30
  -4   5  -1   73.39    2.30
  -4   5  -1   75.19    2.30
   4   5   1   74.99    2.30
   4   5   1   74.59    2.30
  -4   5  -1   75.29    2.20
   4   5   1   72.89    2.20
  -5  -5  -1    7.30    0.30
   5  -5   1    7.50    0.30
   5  -5   1    7.40    0.30
   5   5   1    7.50    0.30
   5   5   1    7.80    0.30
   5   5   1    7.40    0.30
  -5   5  -1    7.40    0.40
  -5   5  -1    7.60    0.30
  -5   5  -1    7.40    0.30
   5   5   1    7.90    0.40
   6  -5   1   11.80    0.40
   6  -5   1   12.00    0.40
  -6  -5  -1   12.00    0.50
  -6   5  -1   12.00    0.40
   6   5   1   12.20    0.50
  -6   5  -1   12.30    0.50
   6   5   1   13.00    0.50
  -6   5  -1   12.40    0.50
   6   5   1   12.60    0.50
   7  -5   1    0.10    0.10
  -7  -5  -1    0.00    0.10
  -7   5  -1    0.00    0.10
   7   5   1    0.00    0.10
  -7   5  -1    0.10    0.10
  -7   5  -1    0.10    0.10
   7   5   1    0.20    0.10
   7   5   1    0.10    0.10
   8  -5   1    4.60    0.20
  -8  -5  -1    4.20    0.30
   8   5   1    4.70    0.20
  -8   5  -1    4.50    0.20
   8   5   1    4.50    0.20
  -8   5  -1    4.40    0.20
  -8   5  -1    4.60    0.20
   9  -5   1    0.20    0.10
   9   5   1    0.10    0.10
  -9   5  -1    0.10    0.10
   9   5   1    0.10    0.10
  -9   5  -1    0.10    0.10
  -9   5  -1    0.20    0.10
  -9   5  -1    0.20    0.10
  10   5   1    6.00    0.20
  10   5   1    6.50    0.20
 -10   5  -1    5.90    0.30
 -10   5  -1    6.00    0.30
  -7   6   1    4.00    0.20
   7   6  -1    4.20    0.20
  -7   6   1    4.40    0.20
  -6  -6   1    4.50    0.20
   6  -6  -1    5.10    0.20
   6   6  -1    4.50    0.20
  -6   6   1    4.70    0.20
  -6   6   1    4.70    0.20
  -6   6   1    4.40    0.20
  -5  -6   1    5.20    0.30
   5  -6  -1    5.70    0.20
   5  -6  -1    5.70    0.20
  -5  -6   1    5.80    0.30
   5   6  -1    5.40    0.20
   5   6  -1    5.70    0.30
  -5   6   1    5.90    0.30
  -5   6   1    5.60    0.20
  -5   6   1    5.70    0.20
   4  -6  -1   19.40    0.60
  -4  -6   1   18.90    0.60
  -4  -6   1   20.40    0.70
   4  -6  -1   19.20    0.60
  -4   6   1   19.80    0.60
   4   6  -1   19.40    0.60
  -4   6   1   19.20    0.60
  -4   6   1   19.10    0.60
   4   6  -1   18.80    0.60
   4   6  -1   17.70    0.60
  -4   6   1   20.80    0.60
   3  -6  -1   64.99    1.90
   3  -6  -1   65.59    1.90
  -3  -6   1   64.49    1.90
  -3  -6   1   65.99    2.00
  -3   6   1   62.79    1.90
  -3   6   1   64.79    1.90
   3   6  -1   65.39    2.00
   3   6  -1   65.19    1.90
  -3   6   1   66.09    2.00
  -3   6   1   60.89    2.00
   3   6  -1   61.89    1.90
  -2  -6   1   10.90    0.40
  -2  -6   1    9.40    0.40
   2  -6  -1   10.20    0.40
   2  -6  -1   10.70    0.40
   2  -6  -1   10.30    0.40
  -2  -6   1   10.70    0.40
  -2   6   1   10.50    0.40
   2   6  -1   10.60    0.40
   2   6  -1   11.10    0.40
   2   6  -1    9.90    0.40
  -2   6   1   10.80    0.40
  -2   6   1   10.90    0.40
  -2   6   1   10.50    0.40
   2   6  -1   10.50    0.40
  -1  -6   1   33.90    1.10
   1  -6  -1   38.60    1.10
  -1  -6   1   39.30    1.10
  -1  -6   1   37.10    1.20
   1  -6  -1   37.00    1.10
   1  -6  -1   35.50    1.20
  -1   6   1   34.50    1.10
   1   6  -1   36.80    1.20
  -1   6   1   36.10    1.10
   1   6  -1   35.10    1.10
  -1   6   1   37.80    1.10
   1   6  -1   37.10    1.10
  -1   6   1   38.20    1.20
   1   6  -1   35.40    1.10
   0  -6   1   59.39    1.70
   0  -6   1   55.99    1.70
   0  -6  -1   55.79    1.70
   0  -6  -1   56.79    1.70
   0  -6   1   52.39    1.70
   0   6  -1   56.79    1.70
   0   6   1   55.79    1.70
   0   6  -1   54.09    1.70
   0   6  -1   52.69    1.70
   0   6   1   56.69    1.70
   0   6   1   56.29    1.70
   0   6  -1   56.69    1.70
   1  -6   1   45.10    1.40
   1  -6   1   48.80    1.40
  -1  -6  -1   48.00    1.50
  -1  -6  -1   45.60    1.40
   1  -6   1   44.60    1.40
   1   6   1   46.50    1.40
   1   6   1   46.90    1.40
   1   6   1   44.90    1.40
  -1   6  -1   47.00    1.40
  -1   6  -1   44.70    1.40
  -1   6  -1   43.70    1.40
  -1   6  -1   46.90    1.40
   1   6   1   47.40    1.40
  -2  -6  -1   52.19    1.70
   2  -6   1   51.59    1.70
   2  -6   1   54.19    1.70
  -2  -6  -1   56.99    1.70
   2  -6   1   58.29    1.70
   2   6   1   57.79    1.70
  -2   6  -1   55.79    1.70
  -2   6  -1   55.39    1.70
   2   6   1   57.89    1.70
   2   6   1   56.59    1.70
  -2   6  -1   58.59    1.70
  -2   6  -1   54.09    1.70
   2   6   1   54.09    1.70
  -3  -6  -1   24.50    0.80
   3  -6   1   26.20    0.80
  -3  -6  -1   28.80    0.90
   3  -6   1   27.70    0.80
   3   6   1   27.40    0.90
  -3   6  -1   25.60    0.80
   3   6   1   27.10    0.90
  -3   6  -1   27.40    0.90
   3   6   1   26.60    0.90
  -3   6  -1   26.30    0.90
   3   6   1   27.20    0.80
  -4  -6  -1    1.70    0.20
   4  -6   1    1.40    0.10
   4  -6   1    1.50    0.10
  -4  -6  -1    1.50    0.10
   4   6   1    1.50    0.20
  -4   6  -1    2.00    0.20
  -4   6  -1    1.70    0.10
   4   6   1    1.70    0.10
   4   6   1    1.50    0.10
  -4   6  -1    1.50    0.10
   5  -6   1    1.50    0.10
  -5  -6  -1    1.40    0.20
  -5   6  -1    1.70    0.10
   5   6   1    1.50    0.10
  -5   6  -1    1.40    0.10
  -5   6  -1    1.40    0.10
   5   6   1    1.60    0.10
  -6  -6  -1    5.60    0.20
  -6   6  -1    5.60    0.20
  -6   6  -1    5.60    0.30
   6   6   1    6.10    0.20
  17   0  -2    0.00    0.10
 -17   0   2    0.10    0.10
  17   0  -2    0.10    0.10
  16   0  -2    6.60    0.30
 -16   0   2    6.10    0.30
  16   0  -2    6.60    0.30
 -15   0   2    0.60    0.10
  15   0  -2    0.70    0.10
  15   0  -2    0.70    0.10
 -15   0   2    0.60    0.10
 -14   0   2   23.70    0.80
  14   0  -2   23.40    0.80
 -14   0   2   22.00    0.80
  14   0  -2   23.80    0.80
 -14   0   2   23.10    0.80
 -13   0   2   55.39    1.70
  13   0  -2   55.09    1.70
 -13   0   2   53.59    1.70
 -13   0   2   55.59    1.70
  13   0  -2   56.79    1.70
  13   0  -2   55.59    1.70
  12   0  -2    0.30    0.30
 -12   0   2    0.40    0.10
 -12   0   2    0.50    0.10
  12   0  -2    0.40    0.10
 -12   0   2    0.50    0.10
 -12   0   2    0.50    0.10
  12   0  -2    0.60    0.10
  12   0  -2    0.50    0.10
 -11   0   2  123.69    3.60
 -11   0   2  120.59    3.60
  11   0  -2  123.39    3.60
 -11   0   2  123.59    3.60
 -11   0   2  118.59    3.60
  11   0  -2  124.89    3.90
  11   0  -2  123.49    3.60
 -11   0   2  120.29    3.60
 -11   0   2  115.19    3.60
  10   0  -2    4.80    0.20
  10   0  -2    4.80    0.40
 -10   0   2    4.80    0.20
  10   0  -2    4.80    0.40
  10   0  -2    5.30    0.20
   9   0  -2   29.40    0.90
   9   0  -2   30.20    1.10
   9   0  -2   32.40    1.10
   8   0  -2 1188.28   35.70
   8   0  -2 1242.58   35.70
   7   0  -2 5101.89  156.38
   7   0  -2 5535.25  156.48
   6   0  -2 1510.15   44.10
   6   0  -2 1473.85   44.10
   5   0  -2  130.59    3.90
   5   0  -2  128.29    3.90
  -4   0   2  283.97    8.60
   4   0  -2  292.27    8.70
   4   0  -2  300.57    8.70
   3   0  -2  969.60   28.60
  -3   0   2  947.81   32.00
   3   0  -2  972.00   28.70
  -3   0   2  989.20   28.60
  -2   0   2  632.84   20.00
   2   0  -2  689.83   23.00
  -2   0   2  685.83   20.00
  -2   0   2  680.93   20.00
   2   0  -2  706.13   20.10
   1   0  -2    1.50    0.10
  -1   0   2    1.30    0.10
  -1   0   2    1.30    0.10
   0   0  -2  690.83   21.20
   0   0   2  696.63   21.10
   0   0   2  722.03   21.20
   1   0   2 3723.03  116.89
   1   0   2 3843.72  116.49
  -1   0  -2 3747.62  117.19
   2   0   2  390.76   11.20
   2   0   2  402.66   11.30
  -2   0  -2  348.27   11.20
   3   0   2  630.74   20.40
   3   0   2  640.64   18.80
   4   0   2   45.70    1.50
   4   0   2   45.50    1.40
   5   0   2   73.99    2.30
   5   0   2   72.09    2.30
   6   0   2  210.58    6.60
   6   0   2  225.28    6.50
   7   0   2   72.79    2.30
   8   0   2  160.68    4.60
   8   0   2  145.49    4.50
  -8   0  -2  153.58    4.50
  -9   0  -2   40.50    1.30
   9   0   2   41.60    1.30
   9   0   2   43.20    1.50
  -9   0  -2   39.40    1.30
   9   0   2   40.40    1.30
  -9   0  -2   39.90    1.30
  10   0   2   77.19    2.30
 -10   0  -2   71.29    2.30
  10   0   2   75.79    2.50
 -10   0  -2   74.89    2.30
  10   0   2   72.59    2.30
 -10   0  -2   72.69    2.20
  11   0   2    0.50    0.10
 -11   0  -2    0.50    0.10
 -11   0  -2    0.40    0.10
  11   0   2    0.90    0.10
 -11   0  -2    0.50    0.10
 -12   0  -2   73.39    2.30
  12   0   2   77.29    2.30
 -12   0  -2   70.99    2.30
  12   0   2   76.79    2.30
  13   0   2  187.98    5.50
 -13   0  -2  184.58    5.50
  13   0   2  183.28    5.50
 -14   0  -2  107.39    3.30
  14   0   2  113.99    3.30
  14   0   2  109.99    3.30
  15   0   2    0.20    0.10
 -15   0  -2    0.20    0.10
  17  -1  -2    0.00    0.10
  17  -1  -2    0.10    0.10
 -17  -1   2    0.00    0.10
  17   1  -2    0.00    0.10
 -17   1   2    0.10    0.10
  17   1  -2    0.10    0.10
  16  -1  -2    0.70    0.10
 -16  -1   2    0.50    0.10
  16  -1  -2    0.50    0.10
 -16   1   2    0.60    0.10
 -16   1   2    0.50    0.10
  16   1  -2    0.50    0.10
  16   1  -2    0.50    0.10
  15  -1  -2   47.10    1.40
  15  -1  -2   44.30    1.40
 -15  -1   2   46.30    1.40
  15  -1  -2   43.30    1.40
 -15   1   2   44.10    1.40
 -15   1   2   47.00    1.40
 -15   1   2   45.40    1.40
  15   1  -2   45.20    1.40
  15   1  -2   47.50    1.40
  14  -1  -2   12.10    0.50
  14  -1  -2   11.80    0.40
 -14  -1   2   12.00    0.50
  14   1  -2   11.70    0.50
 -14   1   2   11.20    0.50
 -14   1   2   11.70    0.50
 -14   1   2   11.60    0.40
  14   1  -2   12.10    0.50
 -14   1   2   12.20    0.50
 -13  -1   2    7.50    0.30
  13  -1  -2    7.20    0.30
  13  -1  -2    7.40    0.30
 -13   1   2    7.10    0.40
  13   1  -2    7.50    0.40
 -13   1   2    7.20    0.30
 -13   1   2    7.00    0.30
  13   1  -2    7.30    0.30
 -13   1   2    7.30    0.30
 -13   1   2    7.30    0.30
 -13   1   2    7.50    0.30
 -12  -1   2    9.50    0.40
  12  -1  -2    9.80    0.40
  12  -1  -2    9.70    0.40
 -12   1   2    9.30    0.40
 -12   1   2    9.30    0.40
 -12   1   2    9.70    0.40
  12   1  -2    9.30    0.40
 -12   1   2    9.70    0.40
 -12   1   2    9.30    0.40
 -12   1   2    9.80    0.40
  12   1  -2    8.80    0.40
  11  -1  -2   -0.10    0.20
 -11  -1   2    0.10    0.10
 -11  -1   2    0.10    0.10
 -11   1   2   -0.10    0.10
  11   1  -2    0.10    0.10
  11   1  -2    0.10    0.10
 -11   1   2    0.10    0.10
 -11   1   2    0.10    0.10
 -11   1   2    0.10    0.10
  11   1  -2    0.20    0.10
 -11   1   2    0.10    0.10
  11   1  -2   -0.10    0.20
 -10  -1   2    5.80    0.30
  10  -1  -2    6.20    0.20
 -10  -1   2    5.70    0.30
  10  -1  -2    6.20    0.50
  10   1  -2    5.70    0.30
 -10   1   2    6.00    0.30
 -10   1   2    6.00    0.30
 -10   1   2    6.00    0.30
  10   1  -2    5.90    0.30
  10   1  -2    5.80    0.40
 -10   1   2    5.30    0.30
  10   1  -2    6.10    0.20
 -10   1   2    6.00    0.30
   9  -1  -2   12.00    0.60
   9  -1  -2   11.10    0.40
   9  -1  -2   12.10    0.50
   9   1  -2   11.70    0.40
  -9   1   2   10.50    0.40
   9   1  -2   11.30    0.40
   9   1  -2   12.00    0.60
   8  -1  -2  853.51   24.10
   8  -1  -2  832.92   24.10
   8   1  -2  777.82   24.10
   8   1  -2  805.42   24.10
   7  -1  -2  303.57    8.80
   7  -1  -2  302.47    8.70
   7   1  -2  285.37    8.70
   7   1  -2  283.97    8.80
   6  -1  -2   31.00    1.00
   6  -1  -2   31.10    1.00
  -6  -1   2   29.40    1.00
   6   1  -2   29.30    1.00
   6   1  -2   30.50    1.00
  -5  -1   2  208.28    6.40
   5  -1  -2  208.28    6.40
   5  -1  -2  220.68    6.40
   5   1  -2  217.88    6.40
   5   1  -2  224.18    6.50
   4  -1  -2  160.78    4.90
   4  -1  -2  172.58    4.80
  -4  -1   2  158.58    4.90
   4   1  -2  167.78    4.90
   4   1  -2  158.38    4.90
   3  -1  -2   30.20    1.00
  -3  -1   2   30.80    1.00
  -3  -1   2   30.00    1.00
   3  -1  -2   31.20    0.90
   3   1  -2   31.50    1.00
  -3   1   2   31.80    1.00
   2  -1  -2  364.06   10.50
  -2  -1   2  363.46   10.50
  -2  -1   2  351.86   10.50
   2   1  -2  339.37   10.50
   2   1  -2  371.56   10.50
  -2   1   2  353.96   10.50
  -1  -1   2  414.56   13.00
  -1  -1   2  443.16   13.00
   1  -1  -2  476.35   13.10
  -1  -1   2  445.96   13.00
   1   1  -2  445.36   13.10
   1   1  -2  416.26   13.00
  -1   1   2  453.65   13.00
   0  -1   2 5537.95  168.88
   0  -1  -2 6234.68  170.78
   0  -1   2 6009.40  174.38
   0  -1   2 5444.15  172.88
   0   1   2 4846.31  167.48
   0   1   2 5603.04  168.98
   0   1  -2 5749.02  173.68
   1  -1   2  801.12   24.20
   1  -1   2  827.12   24.30
   1  -1   2  816.12   24.20
  -1  -1  -2  816.62   24.30
   1   1   2  846.52   24.30
  -2  -1  -2 1315.77   40.80
   2  -1   2 1441.66   41.00
   2  -1   2 1339.17   40.70
   2   1   2 1372.76   40.80
   2   1   2 1450.45   40.90
   3  -1   2   70.99    2.10
  -3  -1  -2   58.99    2.10
   3  -1   2   73.29    2.20
   3   1   2   72.29    2.10
   3   1   2   72.99    2.20
   4  -1   2   78.89    2.40
   4  -1   2   80.89    2.40
   4   1   2   77.29    2.40
   4   1   2   76.89    2.40
   5  -1   2   25.10    0.90
   5  -1   2   25.50    0.90
   5   1   2   25.50    0.90
   6  -1   2   48.10    1.60
   6  -1   2   51.59    1.60
   6   1   2   49.80    1.60
   7  -1   2   12.40    0.40
   7  -1   2   12.50    0.60
   7  -1   2   13.30    0.60
   7   1   2   13.30    0.60
   8  -1   2  417.46   12.70
   8  -1   2  435.36   12.90
   8  -1   2  479.75   13.40
  -8   1  -2  416.76   12.70
   8   1   2  428.66   12.90
   8   1   2  419.36   12.70
   9  -1   2  103.49    3.10
   9  -1   2  107.49    3.10
   9  -1   2  106.69    3.30
  -9  -1  -2  102.39    3.10
   9   1   2  106.99    3.10
   9   1   2  107.49    3.30
  -9   1  -2  106.19    3.10
  -9   1  -2  101.99    3.10
  -9   1  -2   98.29    3.10
  -9   1  -2  106.89    3.10
   9   1   2  100.19    3.10
 -10  -1  -2    2.50    0.20
  10  -1   2    2.60    0.20
  10  -1   2    2.40    0.20
  10  -1   2    2.50    0.40
  10   1   2    2.50    0.20
  10   1   2    2.70    0.40
 -10   1  -2    2.60    0.20
 -10   1  -2    2.30    0.20
 -10   1  -2    2.70    0.20
  10   1   2    2.80    0.20
 -10   1  -2    2.30    0.20
  11  -1   2    4.40    0.20
 -11  -1  -2    3.90    0.30
  11   1   2    4.30    0.30
 -11   1  -2    4.50    0.30
  11   1   2    4.50    0.20
 -11   1  -2    4.40    0.20
 -11   1  -2    4.10    0.20
 -12  -1  -2   79.89    2.40
  12  -1   2   81.29    2.40
  12  -1   2   78.39    2.40
  12   1   2   77.29    2.40
  12   1   2   82.39    2.40
 -12   1  -2   80.29    2.40
 -12   1  -2   76.79    2.40
 -12   1  -2   80.59    2.40
  13  -1   2   81.29    2.50
  13  -1   2   87.19    2.50
 -13  -1  -2   84.59    2.50
  13   1   2   81.59    2.50
 -13   1  -2   82.49    2.50
 -13   1  -2   80.69    2.50
 -13   1  -2   80.29    2.50
  13   1   2   83.29    2.50
  14  -1   2   37.30    1.20
 -14  -1  -2   39.50    1.20
  14  -1   2   36.50    1.20
 -14   1  -2   37.60    1.20
  14   1   2   37.20    1.20
  14   1   2   36.80    1.20
  15  -1   2    0.10    0.10
 -15  -1  -2    0.10    0.10
  15   1   2    0.10    0.10
  15   1   2    0.40    0.10
 -15   1  -2    0.10    0.10
  16  -2  -2   12.90    0.50
  16  -2  -2   13.90    0.50
 -16  -2   2   13.90    0.50
  16   2  -2   14.70    0.50
  16   2  -2   13.30    0.50
 -16   2   2   14.00    0.50
 -16   2   2   13.30    0.50
 -16   2   2   13.70    0.50
 -15  -2   2   31.30    1.00
  15  -2  -2   29.90    1.00
  15  -2  -2   30.50    1.00
  15  -2  -2   31.90    1.00
 -15   2   2   31.70    1.00
 -15   2   2   31.40    1.00
 -15   2   2   29.40    1.00
  15   2  -2   30.20    1.00
 -15   2   2   30.40    1.00
  15   2  -2   31.80    1.00
  14  -2  -2    4.10    0.20
  14  -2  -2    4.30    0.30
 -14  -2   2    4.20    0.30
 -14   2   2    4.20    0.20
 -14   2   2    4.30    0.30
 -14   2   2    4.20    0.20
  14   2  -2    4.20    0.20
 -14   2   2    4.20    0.20
  14   2  -2    4.50    0.30
 -14   2   2    4.20    0.20
  13  -2  -2    6.70    0.30
  13  -2  -2    7.10    0.30
 -13  -2   2    7.00    0.30
 -13   2   2    6.70    0.30
 -13   2   2    6.50    0.30
 -13   2   2    6.50    0.30
 -13   2   2    6.90    0.30
  13   2  -2    6.70    0.30
 -13   2   2    6.40    0.30
  13   2  -2    6.60    0.30
  12  -2  -2  136.89    4.10
 -12  -2   2  136.09    4.10
 -12   2   2  142.69    4.10
 -12   2   2  132.69    4.10
  12   2  -2  138.19    4.10
  12   2  -2  136.39    4.10
 -12   2   2  134.99    4.10
 -12   2   2  135.59    4.10
 -12   2   2  137.39    4.10
  11  -2  -2  158.68    5.40
 -11  -2   2  168.58    5.10
  11  -2  -2  174.98    5.10
 -11   2   2  170.18    5.10
 -11   2   2  175.98    5.10
  11   2  -2  176.48    5.10
 -11   2   2  176.28    5.10
 -11   2   2  171.38    5.10
  11   2  -2  170.48    5.10
 -11   2   2  174.08    5.10
  10  -2  -2   31.90    1.00
 -10  -2   2   31.40    1.00
  10  -2  -2   30.40    1.20
 -10   2   2   32.70    1.00
  10   2  -2   31.20    1.00
 -10   2   2   32.10    1.00
 -10   2   2   32.90    1.00
 -10   2   2   31.20    1.00
  -9  -2   2    6.00    0.30
   9  -2  -2    6.30    0.40
   9  -2  -2    6.20    0.20
  -9   2   2    6.30    0.30
  -9   2   2    6.30    0.30
  -9   2   2    6.20    0.30
  -9   2   2    6.40    0.30
  -9   2   2    6.20    0.30
   9   2  -2    6.00    0.30
   9   2  -2    6.30    0.30
   9   2  -2    6.40    0.60
   8  -2  -2    0.90    0.20
   8  -2  -2    0.70    0.10
   8  -2  -2    0.90    0.20
   8   2  -2    0.50    0.20
  -8   2   2    0.80    0.10
   8   2  -2    0.80    0.10
   7  -2  -2   33.70    1.10
   7  -2  -2   32.60    1.10
   7   2  -2   31.40    1.10
   6  -2  -2   10.00    0.40
   6  -2  -2    9.80    0.40
   6   2  -2   10.10    0.40
  -5  -2   2    2.30    0.20
   5  -2  -2    2.40    0.20
   5  -2  -2    2.20    0.20
   5   2  -2    2.50    0.20
   4  -2  -2  141.29    3.90
   4  -2  -2  111.49    4.00
   4  -2  -2  131.29    3.90
   4   2  -2  134.89    4.00
   4   2  -2  129.69    3.90
  -3  -2   2    6.00    0.30
   3  -2  -2    5.50    0.20
   3  -2  -2    5.90    0.30
   3  -2  -2    6.10    0.30
   3   2  -2    6.80    0.30
   3   2  -2    5.60    0.20
   2  -2  -2    5.40    0.20
  -2  -2   2    5.20    0.30
   2  -2  -2    4.80    0.20
   2  -2  -2    5.40    0.20
   2   2  -2    5.30    0.30
   1  -2  -2    2.10    0.20
   1  -2  -2    2.10    0.10
  -1  -2   2    2.10    0.20
   1   2  -2    2.10    0.20
   0  -2   2  783.82   23.30
   0  -2  -2  835.72   23.20
   0  -2  -2  795.82   23.30
   0   2   2  725.63   23.00
  -1  -2  -2  113.79    3.20
   1  -2   2  100.29    3.20
   1  -2   2  109.79    3.20
   1   2   2  102.09    3.10
   2  -2   2  117.79    3.40
  -2  -2  -2  116.69    3.40
   2  -2   2  106.99    3.40
   2   2   2  108.79    3.30
   3  -2   2   75.99    2.30
   3  -2   2   77.29    2.40
   3   2   2   74.69    2.30
   4  -2   2  520.75   15.30
   4  -2   2  514.15   15.20
   4   2   2  516.35   15.20
   5  -2   2   13.10    0.50
   5  -2   2   12.00    0.60
   5   2   2   12.30    0.50
  -6  -2  -2   58.29    1.80
   6  -2   2   58.19    2.00
   6  -2   2   57.89    1.90
   6  -2   2   60.29    1.80
   6   2   2   65.09    1.90
   6   2   2   59.99    1.90
  -7  -2  -2    5.00    0.20
  -7  -2  -2    5.00    0.30
   7  -2   2    4.40    0.30
   7  -2   2    5.30    0.40
   7  -2   2    5.10    0.20
  -7   2  -2    5.20    0.20
   7   2   2    5.50    0.40
   7   2   2    5.50    0.20
  -7   2  -2    5.10    0.20
  -7   2  -2    5.00    0.20
  -8  -2  -2  102.29    3.10
   8  -2   2   99.29    3.20
   8  -2   2  105.99    3.10
  -8   2  -2  106.19    3.10
   8   2   2  103.89    3.10
  -8   2  -2  105.69    3.10
  -8   2  -2  103.69    3.10
   8   2   2  104.69    3.10
  -8   2  -2   98.79    3.10
  -8   2  -2  101.19    3.10
  -9  -2  -2  132.59    4.00
   9  -2   2  124.59    4.10
   9  -2   2  136.29    3.90
  -9   2  -2  139.69    4.00
  -9   2  -2  128.19    4.00
   9   2   2  130.49    4.00
   9   2   2  132.99    4.00
  -9   2  -2  133.99    4.00
  -9   2  -2  133.59    4.00
 -10  -2  -2    7.60    0.40
  10  -2   2    7.60    0.30
 -10   2  -2    7.90    0.30
  10   2   2    7.70    0.30
 -10   2  -2    7.40    0.30
  10   2   2    7.80    0.30
 -10   2  -2    7.90    0.30
  11  -2   2    8.90    0.40
  11  -2   2    7.80    0.30
 -11  -2  -2    8.10    0.40
  11   2   2    7.90    0.40
 -11   2  -2    7.70    0.30
 -11   2  -2    7.70    0.40
 -11   2  -2    8.30    0.30
  11   2   2    8.20    0.30
 -11   2  -2    7.90    0.40
  12  -2   2  255.87    7.60
 -12  -2  -2  249.78    7.60
  12   2   2  246.58    7.50
 -12   2  -2  256.57    7.60
  12   2   2  261.57    7.60
 -12   2  -2  256.07    7.50
 -12   2  -2  251.07    7.50
 -12   2  -2  263.77    7.60
  13  -2   2   78.89    2.40
 -13  -2  -2   83.99    2.50
  13  -2   2   78.39    2.40
  13   2   2   80.89    2.40
 -13   2  -2   80.19    2.40
  13   2   2   81.39    2.50
 -13   2  -2   81.39    2.40
 -13   2  -2   81.99    2.50
  14  -2   2    8.70    0.30
 -14  -2  -2    9.00    0.40
 -14   2  -2    9.00    0.30
  14   2   2    9.20    0.30
  14   2   2    8.90    0.30
 -14   2  -2    8.60    0.30
 -15  -2  -2    8.90    0.30
 -15   2  -2    8.70    0.30
 -15  -3   2   10.20    0.40
  15   3  -2   11.00    0.40
 -15   3   2   10.60    0.40
 -15   3   2   10.60    0.40
 -15   3   2   10.60    0.40
 -15   3   2    9.60    0.40
  15   3  -2   10.30    0.40
 -14  -3   2    4.00    0.20
  14  -3  -2    4.10    0.20
  14  -3  -2    3.70    0.20
 -14   3   2    3.80    0.20
 -14   3   2    3.80    0.20
 -14   3   2    4.00    0.20
 -14   3   2    3.70    0.20
  14   3  -2    3.90    0.20
  14   3  -2    4.00    0.20
 -14   3   2    3.90    0.20
  13  -3  -2   16.10    0.50
 -13  -3   2   15.50    0.60
 -13   3   2   15.60    0.60
  13   3  -2   17.40    0.60
 -13   3   2   15.70    0.60
 -13   3   2   15.80    0.60
 -13   3   2   15.90    0.60
 -13   3   2   15.60    0.60
  13   3  -2   16.70    0.60
 -12  -3   2  188.78    5.70
  12  -3  -2  186.48    5.70
 -12   3   2  196.28    5.70
  12   3  -2  191.48    5.70
 -12   3   2  189.58    5.70
 -12   3   2  196.08    5.70
 -12   3   2  186.58    5.70
  12   3  -2  192.78    5.70
 -12   3   2  191.68    5.70
  11  -3  -2  343.97   10.30
 -11  -3   2  335.97   10.30
 -11   3   2  360.06   10.30
  11   3  -2  352.56   10.30
  11   3  -2  348.97   10.30
 -11   3   2  346.57   10.30
 -11   3   2  349.96   10.30
 -11   3   2  354.76   10.30
 -11   3   2  354.06   10.30
 -10  -3   2  175.18    5.10
  10  -3  -2  168.48    5.00
  10   3  -2  168.58    5.00
 -10   3   2  165.28    5.10
 -10   3   2  173.48    5.00
 -10   3   2  166.98    5.10
 -10   3   2  172.88    5.00
  10   3  -2  168.18    5.10
 -10   3   2  166.48    5.00
   9  -3  -2   37.10    1.10
  -9   3   2   36.30    1.20
  -9   3   2   37.40    1.20
  -9   3   2   35.60    1.20
  -9   3   2   35.60    1.20
   9   3  -2   36.10    1.20
   9   3  -2   35.20    1.20
  -9   3   2   37.70    1.20
   8  -3  -2   23.00    0.70
  -8   3   2   23.40    0.80
  -8   3   2   23.20    0.80
  -8   3   2   23.30    0.80
   8   3  -2   22.60    0.80
  -8   3   2   23.00    0.80
   8   3  -2   22.80    0.80
  -8   3   2   23.20    0.80
   7  -3  -2    5.60    0.20
   7   3  -2    5.30    0.30
   7   3  -2    5.50    0.30
   7   3  -2    5.70    0.30
  -7   3   2    6.00    0.20
  -7   3   2    5.70    0.20
  -7   3   2    5.60    0.30
  -7   3   2    6.00    0.30
  -7   3   2    5.70    0.20
  -6  -3   2   25.40    0.80
   6  -3  -2   26.20    1.00
   6   3  -2   24.70    0.80
   6   3  -2   26.00    0.80
  -6   3   2   25.40    0.80
  -6   3   2   26.40    0.80
  -6   3   2   25.40    0.80
  -5  -3   2  102.29    3.10
   5  -3  -2  105.39    3.20
  -5   3   2  104.59    3.10
  -4  -3   2  206.88    6.30
   4  -3  -2  205.98    6.20
  -4  -3   2  212.68    6.10
  -3  -3   2  620.74   18.70
  -3  -3   2  626.84   18.50
   3  -3  -2  644.44   18.60
   2  -3  -2  366.26   10.70
  -2  -3   2  356.36   10.80
   1  -3  -2   40.00    1.30
  -1  -3   2   39.10    1.40
   0  -3  -2    5.40    0.30
   0  -3   2    5.10    0.30
   1  -3   2   10.80    0.50
  -1  -3  -2   12.00    0.50
  -2  -3  -2   66.49    2.10
   2  -3   2   64.99    2.10
  -2  -3  -2   63.49    1.90
   2  -3   2   63.09    1.90
  -3  -3  -2  328.17    9.60
   3  -3   2  318.27    9.70
   3  -3   2  335.27    9.60
  -3  -3  -2  327.97    9.70
   3   3   2  318.87    9.60
  -4  -3  -2  312.87    9.60
   4  -3   2  330.37    9.40
  -4  -3  -2  326.67    9.40
   4  -3   2  309.87    9.60
  -4   3  -2  318.47    9.40
   4   3   2  320.67    9.40
   5  -3   2  120.89    4.00
  -5  -3  -2  120.99    3.50
   5  -3   2  113.89    3.50
  -5  -3  -2  115.09    3.80
   5  -3   2  122.09    3.60
  -5   3  -2  114.69    3.60
   5   3   2  118.59    3.60
  -5   3  -2  125.89    3.60
   5   3   2  122.99    3.60
  -5   3  -2  119.39    3.60
   5   3   2  117.99    3.60
  -5   3  -2  120.69    3.60
  -6  -3  -2   10.40    0.30
   6  -3   2    9.90    0.40
  -6   3  -2    9.60    0.40
   6   3   2    9.50    0.40
  -6   3  -2    9.60    0.40
  -6   3  -2    9.50    0.40
   6   3   2    9.50    0.40
  -6   3  -2    9.10    0.40
   6   3   2    9.80    0.40
  -6   3  -2    9.80    0.40
  -7  -3  -2    4.80    0.20
   7  -3   2    5.10    0.20
   7   3   2    4.90    0.30
  -7   3  -2    4.90    0.20
  -7   3  -2    4.90    0.30
  -7   3  -2    5.00    0.30
  -7   3  -2    4.80    0.30
   7   3   2    4.90    0.30
  -7   3  -2    4.70    0.30
   8  -3   2   24.00    0.80
  -8  -3  -2   24.50    0.80
  -8   3  -2   24.80    0.80
  -8   3  -2   23.90    0.80
  -8   3  -2   24.10    0.80
  -8   3  -2   24.40    0.80
   8   3   2   24.00    0.80
  -8   3  -2   25.00    0.80
   8   3   2   24.80    0.80
   9  -3   2   30.00    0.90
  -9  -3  -2   27.90    1.00
  -9   3  -2   29.20    0.90
   9   3   2   29.90    1.00
  -9   3  -2   30.30    1.00
   9   3   2   28.90    1.00
  -9   3  -2   28.90    1.00
  -9   3  -2   28.40    1.00
  -9   3  -2   29.10    1.00
 -10  -3  -2   23.30    0.80
 -10   3  -2   24.10    0.80
 -10   3  -2   23.10    0.80
 -10   3  -2   23.50    0.80
  10   3   2   22.90    0.80
 -10   3  -2   23.90    0.80
 -10   3  -2   22.60    0.80
  10   3   2   23.60    0.80
  11  -3   2   24.80    0.80
 -11  -3  -2   26.20    0.90
  11  -3   2   26.20    0.90
 -11   3  -2   26.70    0.90
 -11   3  -2   27.10    0.90
 -11   3  -2   25.40    0.90
 -11   3  -2   27.30    0.90
  11   3   2   25.40    0.90
  11   3   2   26.50    0.90
 -12  -3  -2   26.00    0.80
  12  -3   2   24.90    0.80
 -12   3  -2   26.00    0.80
 -12   3  -2   26.00    0.80
  12   3   2   25.20    0.80
 -12   3  -2   25.70    0.80
  12   3   2   25.40    0.80
  13  -3   2    5.00    0.20
 -13  -3  -2    5.20    0.20
 -13   3  -2    4.90    0.20
  13   3   2    5.30    0.20
 -13   3  -2    5.00    0.20
  13   3   2    5.00    0.20
 -14   3  -2    0.40    0.10
 -14   3  -2    0.30    0.10
  14   4  -2    0.60    0.10
 -14   4   2    0.70    0.10
  13  -4  -2   86.29    2.50
  13  -4  -2   84.79    2.60
 -13   4   2   81.49    2.50
 -13   4   2   86.39    2.50
  13   4  -2   87.99    2.60
 -13   4   2   86.49    2.60
 -13   4   2   84.69    2.50
  13   4  -2   83.29    2.50
 -13   4   2   84.39    2.60
  12  -4  -2    1.20    0.10
 -12   4   2    1.20    0.10
 -12   4   2    1.20    0.10
  12   4  -2    1.20    0.10
 -12   4   2    1.80    0.20
 -12   4   2    1.30    0.10
  12   4  -2    1.20    0.10
 -12   4   2    1.00    0.10
  11  -4  -2    0.60    0.10
 -11   4   2    0.50    0.10
 -11   4   2    0.50    0.10
  11   4  -2    0.80    0.10
 -11   4   2    0.60    0.10
 -11   4   2    0.70    0.10
 -11   4   2    0.50    0.10
  11   4  -2    0.60    0.10
  10  -4  -2   23.20    0.80
 -10   4   2   24.10    0.80
  10   4  -2   23.80    0.80
  10   4  -2   24.30    0.80
 -10   4   2   24.30    0.80
 -10   4   2   24.00    0.80
 -10   4   2   23.80    0.80
   9  -4  -2    0.30    0.10
  -9   4   2    0.10    0.10
  -9   4   2    0.20    0.10
   9   4  -2    0.30    0.10
   9   4  -2    0.20    0.10
  -9   4   2    0.10    0.10
  -9   4   2    0.10    0.10
  -8  -4   2   29.20    1.00
   8  -4  -2   29.60    0.90
  -8   4   2   29.70    1.00
  -8   4   2   30.20    1.00
   8   4  -2   28.80    1.00
  -8   4   2   30.20    1.00
   8   4  -2   29.10    1.00
  -8   4   2   31.10    1.00
   7  -4  -2  102.19    2.90
  -7  -4   2   97.59    3.00
   7   4  -2   97.99    3.00
  -7   4   2  102.09    3.00
  -7   4   2  101.99    3.00
   7   4  -2   92.79    3.00
   7   4  -2   94.29    3.00
  -7   4   2   98.49    3.00
  -6  -4   2    0.10    0.10
   6  -4  -2    0.00    0.10
  -6   4   2    0.10    0.10
   6   4  -2    0.00    0.10
   6   4  -2    0.10    0.10
   6   4  -2   -0.10    0.10
  -6   4   2    0.00    0.10
  -6   4   2    0.00    0.10
   6   4  -2   -0.10    0.10
  -6   4   2   -0.10    0.10
  -5  -4   2    0.90    0.10
   5  -4  -2    1.00    0.10
   5   4  -2    0.80    0.10
   5   4  -2    0.90    0.10
   5   4  -2    1.00    0.10
   5   4  -2    0.90    0.10
  -5   4   2    0.90    0.10
  -5   4   2    0.80    0.10
  -5   4   2    0.80    0.10
   5   4  -2    0.90    0.10
  -5   4   2    0.90    0.10
   4  -4  -2   28.50    0.90
  -4  -4   2   29.60    0.90
  -4   4   2   28.60    0.90
   4   4  -2   27.40    0.90
  -4   4   2   29.00    0.90
  -4   4   2   28.40    0.90
   4   4  -2   27.20    0.90
  -4   4   2   29.40    0.90
   4   4  -2   27.70    0.90
   4   4  -2   28.70    0.90
   4   4  -2   27.30    0.90
   3  -4  -2    6.70    0.20
  -3  -4   2    6.90    0.30
  -3   4   2    6.90    0.30
   3   4  -2    6.40    0.30
   3   4  -2    7.00    0.30
  -3   4   2    6.60    0.30
  -3   4   2    6.50    0.30
   3   4  -2    6.70    0.30
  -3   4   2    6.90    0.30
  -3   4   2    7.00    0.30
   3   4  -2    7.10    0.30
   2  -4  -2   39.30    1.20
  -2  -4   2   38.00    1.20
  -2   4   2   37.70    1.20
  -2   4   2   38.60    1.20
  -2   4   2   38.70    1.20
   2   4  -2   37.60    1.20
  -2   4   2   37.30    1.20
   2   4  -2   36.50    1.20
   2   4  -2   36.50    1.20
  -2   4   2   37.30    1.20
   2   4  -2   37.10    1.20
   2   4  -2   37.60    1.20
  -1  -4   2    0.10    0.10
   1  -4  -2    0.10    0.10
  -1  -4   2    0.10    0.10
   1   4  -2    0.20    0.10
   1   4  -2    0.50    0.10
   1   4  -2    0.10    0.10
  -1   4   2    0.20    0.10
   1   4  -2    0.10    0.10
  -1   4   2    0.00    0.10
  -1   4   2    0.10    0.10
  -1   4   2    0.10    0.10
  -1   4   2    0.00    0.10
   1   4  -2    0.10    0.10
   0  -4   2    4.40    0.30
   0  -4  -2    4.40    0.20
   0  -4   2    4.40    0.20
   0   4  -2    4.30    0.20
   0   4  -2    4.40    0.20
   0   4   2    4.50    0.20
   0   4   2    4.50    0.20
   0   4   2    4.10    0.20
   0   4  -2    4.40    0.20
   0   4  -2    4.60    0.30
   0   4   2    4.20    0.30
   0   4  -2    4.40    0.20
   1  -4   2    3.10    0.20
   1  -4   2    3.30    0.20
   1   4   2    3.00    0.20
  -1   4  -2    3.30    0.20
   1   4   2    3.30    0.20
  -1   4  -2    3.50    0.20
  -1   4  -2    3.10    0.20
  -1   4  -2    3.20    0.20
   1   4   2    3.30    0.20
  -1   4  -2    3.40    0.20
   1   4   2    3.00    0.20
   2  -4   2  100.49    3.20
  -2  -4  -2  110.29    3.10
   2   4   2  102.69    3.20
   2   4   2  106.39    3.20
  -2   4  -2  105.79    3.20
  -2   4  -2  106.49    3.20
  -2   4  -2  101.09    3.20
  -2   4  -2  106.19    3.10
  -2   4  -2  106.89    3.20
   2   4   2  105.79    3.20
   2   4   2  105.79    3.10
   3  -4   2   18.30    0.60
   3  -4   2   14.70    0.70
   3  -4   2   16.40    0.60
  -3  -4  -2   18.20    0.60
   3   4   2   16.30    0.60
  -3   4  -2   16.30    0.60
   3   4   2   16.80    0.60
  -3   4  -2   16.90    0.60
  -3   4  -2   17.20    0.60
  -3   4  -2   17.20    0.60
   3   4   2   17.20    0.60
   3   4   2   16.20    0.60
   4  -4   2    8.80    0.30
   4  -4   2    8.20    0.30
  -4  -4  -2    8.70    0.30
  -4   4  -2   10.30    0.40
  -4   4  -2    8.60    0.30
   4   4   2    8.60    0.40
  -4   4  -2    8.30    0.40
  -4   4  -2    8.90    0.30
  -4   4  -2    8.40    0.40
   4   4   2    8.60    0.40
   4   4   2    8.50    0.40
   4   4   2    8.40    0.30
   5  -4   2   35.00    1.10
   5  -4   2   32.50    1.10
  -5  -4  -2   34.60    1.10
  -5   4  -2   34.10    1.10
   5   4   2   33.50    1.10
  -5   4  -2   34.80    1.10
   5   4   2   34.20    1.10
   5   4   2   35.00    1.10
  -5   4  -2   33.90    1.10
  -5   4  -2   33.00    1.10
   5   4   2   33.30    1.10
  -5   4  -2   33.40    1.10
   6  -4   2   66.89    2.10
   6  -4   2   71.99    2.10
  -6  -4  -2   68.29    2.10
  -6   4  -2   69.59    2.10
   6   4   2   71.99    2.10
  -6   4  -2   68.29    2.10
  -6   4  -2   69.19    2.20
   6   4   2   69.09    2.10
  -6   4  -2   67.29    2.10
   6   4   2   73.19    2.20
   7  -4   2   83.99    2.50
  -7  -4  -2   78.19    2.50
   7   4   2   85.99    2.60
  -7   4  -2   84.69    2.50
  -7   4  -2   85.29    2.50
   7   4   2   86.09    2.60
  -7   4  -2   81.79    2.50
   7   4   2   84.19    2.60
  -7   4  -2   83.29    2.60
   8  -4   2   55.99    1.70
  -8   4  -2   57.69    1.70
   8   4   2   55.29    1.70
   8   4   2   57.39    1.70
  -8   4  -2   52.89    1.70
  -8   4  -2   54.39    1.70
  -8   4  -2   55.59    1.70
  -8   4  -2   54.29    1.70
   9  -4   2   11.20    0.40
  -9   4  -2   11.30    0.40
  -9   4  -2   11.50    0.40
  -9   4  -2   11.70    0.40
  -9   4  -2   11.20    0.40
  -9   4  -2   11.60    0.40
   9   4   2   11.40    0.40
   9   4   2   11.40    0.40
 -10   4  -2    3.70    0.20
 -10   4  -2    3.90    0.20
 -10   4  -2    3.80    0.20
  10   4   2    3.60    0.20
 -10   4  -2    3.60    0.20
  10   4   2    3.80    0.20
 -10   4  -2    3.60    0.20
  11  -4   2   49.00    1.60
 -11   4  -2   50.89    1.60
  11   4   2   52.59    1.60
 -11   4  -2   50.59    1.60
 -11   4  -2   53.09    1.60
  11   4   2   52.59    1.60
 -11   4  -2   52.89    1.60
 -12   4  -2    2.40    0.10
 -12   4  -2    2.20    0.10
  12   4   2    2.40    0.10
  12   4   2    2.60    0.10
 -11   5   2    1.40    0.10
  11   5  -2    1.60    0.10
 -11   5   2    1.40    0.10
 -11   5   2    1.60    0.10
  10  -5  -2    0.20    0.10
  10   5  -2    0.20    0.10
 -10   5   2    0.20    0.10
 -10   5   2    0.10    0.10
 -10   5   2    0.10    0.10
  10   5  -2    0.20    0.10
   9  -5  -2    6.20    0.20
   9   5  -2    5.90    0.30
  -9   5   2    5.80    0.30
  -9   5   2    6.20    0.30
  -9   5   2    6.20    0.30
   9   5  -2    6.10    0.30
  -8  -5   2    0.40    0.10
   8  -5  -2    0.40    0.10
   8   5  -2    0.80    0.10
   8   5  -2    0.50    0.10
  -8   5   2    0.70    0.10
  -8   5   2    0.50    0.10
  -8   5   2    0.60    0.10
  -7  -5   2    0.00    0.10
   7  -5  -2    0.10    0.10
  -7   5   2    0.10    0.10
  -7   5   2    0.10    0.10
  -7   5   2    0.30    0.10
   7   5  -2    0.10    0.10
   7   5  -2    0.10    0.10
   6  -5  -2    0.00    0.10
   6  -5  -2    0.10    0.10
  -6  -5   2    0.00    0.10
   6   5  -2    0.00    0.10
  -6   5   2    0.00    0.10
   6   5  -2    0.00    0.10
   6   5  -2    0.00    0.10
  -6   5   2    0.20    0.10
  -6   5   2    0.00    0.10
  -6   5   2    0.10    0.10
  -5  -5   2    5.00    0.30
   5  -5  -2    4.70    0.20
   5   5  -2    4.50    0.20
   5   5  -2    4.60    0.20
   5   5  -2    4.60    0.20
   5   5  -2    4.70    0.30
  -5   5   2    4.50    0.30
  -5   5   2    4.90    0.30
   5   5  -2    4.60    0.30
  -5   5   2    4.90    0.20
  -5   5   2    4.20    0.20
  -4  -5   2    2.10    0.20
  -4  -5   2    1.80    0.10
   4  -5  -2    2.10    0.10
  -4   5   2    2.00    0.20
  -4   5   2    1.80    0.20
   4   5  -2    2.00    0.20
   4   5  -2    1.70    0.20
   4   5  -2    2.10    0.20
   4   5  -2    1.90    0.20
  -4   5   2    2.00    0.20
   4   5  -2    1.70    0.20
  -4   5   2    1.80    0.20
   3  -5  -2   21.20    0.70
   3  -5  -2   20.10    0.70
  -3  -5   2   21.60    0.80
  -3  -5   2   19.90    0.70
   3   5  -2   20.40    0.70
   3   5  -2   20.20    0.70
  -3   5   2   20.90    0.70
  -3   5   2   20.00    0.70
  -3   5   2   19.40    0.70
  -3   5   2   21.60    0.70
   3   5  -2   20.90    0.70
   3   5  -2   19.40    0.70
   3   5  -2   19.60    0.70
  -3   5   2   20.60    0.70
   2  -5  -2  268.57    7.80
  -2  -5   2  270.87    7.90
  -2  -5   2  263.87    7.80
  -2   5   2  258.97    7.80
  -2   5   2  253.07    7.80
   2   5  -2  258.97    7.80
  -2   5   2  272.87    7.80
  -2   5   2  274.97    7.80
  -2   5   2  269.07    7.80
   2   5  -2  255.37    7.80
   2   5  -2  257.77    7.80
   2   5  -2  263.27    7.80
   2   5  -2  268.97    7.90
   1  -5  -2   73.19    2.20
  -1  -5   2   69.99    2.20
  -1  -5   2   73.49    2.20
  -1   5   2   73.69    2.20
  -1   5   2   70.39    2.20
   1   5  -2   70.19    2.20
   1   5  -2   73.59    2.20
  -1   5   2   69.39    2.20
  -1   5   2   71.99    2.20
   1   5  -2   72.49    2.20
   1   5  -2   72.79    2.20
   1   5  -2   68.79    2.20
  -1   5   2   73.99    2.20
   0  -5  -2  518.85   14.70
   0  -5   2  485.05   14.80
   0  -5   2  501.05   14.70
   0   5  -2  501.45   14.70
   0   5   2  501.95   14.80
   0   5  -2  504.05   14.70
   0   5   2  516.65   14.70
   0   5  -2  487.25   14.80
   0   5   2  496.25   14.80
   0   5   2  506.75   14.70
   0   5  -2  492.45   14.70
   1  -5   2  110.39    3.40
   1  -5   2  111.69    3.40
   1  -5   2  115.39    3.40
  -1  -5  -2  114.89    3.40
   1   5   2  118.19    3.40
  -1   5  -2  113.89    3.40
   1   5   2  112.29    3.40
  -1   5  -2  116.19    3.40
   1   5   2  110.99    3.40
  -1   5  -2  113.89    3.40
  -1   5  -2  109.69    3.40
   1   5   2  115.99    3.40
   2  -5   2   20.50    0.70
   2  -5   2   19.30    0.70
  -2  -5  -2   21.20    0.70
   2  -5   2   21.00    0.70
   2   5   2   19.90    0.70
  -2   5  -2   21.40    0.70
   2   5   2   20.40    0.70
  -2   5  -2   20.10    0.70
  -2   5  -2   20.40    0.70
   2   5   2   20.30    0.70
   2   5   2   20.60    0.70
  -2   5  -2   21.70    0.70
   3  -5   2   49.50    1.50
  -3  -5  -2   52.29    1.50
   3  -5   2   47.30    1.70
   3  -5   2   49.90    1.50
   3   5   2   50.39    1.50
  -3   5  -2   51.59    1.50
   3   5   2   50.39    1.60
   3   5   2   49.80    1.60
  -3   5  -2   48.60    1.50
  -3   5  -2   50.99    1.60
  -3   5  -2   48.70    1.60
   3   5   2   51.29    1.60
   4  -5   2   43.10    1.30
  -4  -5  -2   42.40    1.30
   4  -5   2   42.40    1.30
   4   5   2   43.70    1.40
  -4   5  -2   41.30    1.30
  -4   5  -2   41.90    1.30
   4   5   2   41.50    1.30
  -4   5  -2   43.20    1.40
   4   5   2   42.40    1.40
   4   5   2   42.50    1.30
   5  -5   2    0.70    0.10
  -5  -5  -2    0.70    0.10
   5  -5   2    0.90    0.10
   5   5   2    0.70    0.10
  -5   5  -2    0.80    0.10
   5   5   2    0.70    0.10
  -5   5  -2    0.80    0.10
   5   5   2    0.90    0.10
   5   5   2    0.80    0.10
  -5   5  -2    1.00    0.10
   6  -5   2   22.80    0.70
  -6  -5  -2   21.10    0.70
   6  -5   2   22.50    0.70
   6   5   2   22.70    0.80
  -6   5  -2   23.80    0.80
  -6   5  -2   23.60    0.80
   6   5   2   24.80    0.80
  -6   5  -2   22.30    0.80
   6   5   2   24.70    0.80
   7  -5   2    1.30    0.10
  -7  -5  -2    1.00    0.10
  -7   5  -2    1.30    0.10
  -7   5  -2    1.30    0.10
   7   5   2    1.30    0.10
  -7   5  -2    1.40    0.10
   7   5   2    1.30    0.10
   7   5   2    1.20    0.10
   8  -5   2   17.70    0.60
  -8   5  -2   17.90    0.60
  -8   5  -2   17.20    0.60
  -8   5  -2   17.20    0.60
   8   5   2   18.20    0.60
  -8   5  -2   17.90    0.60
   8   5   2   17.60    0.60
   9   5   2   18.70    0.60
   9   5   2   18.90    0.60
  -9   5  -2   17.90    0.60
  -9   5  -2   18.50    0.60
  -9   5  -2   17.30    0.60
  -7  -6   2    0.20    0.10
  -7   6   2    0.20    0.10
  -7   6   2    0.30    0.10
   7   6  -2    0.20    0.10
  -6  -6   2   49.99    1.50
   6  -6  -2   49.30    1.50
  -6   6   2   47.50    1.50
  -6   6   2   48.80    1.50
  -6   6   2   48.40    1.50
   6   6  -2   48.90    1.50
  -5  -6   2   13.60    0.50
   5  -6  -2   13.30    0.40
   5  -6  -2   12.70    0.40
  -5   6   2   12.60    0.50
  -5   6   2   13.30    0.50
  -5   6   2   12.90    0.40
   5   6  -2   12.50    0.50
  -4  -6   2    0.30    0.10
   4  -6  -2    0.30    0.10
   4  -6  -2    0.30    0.10
  -4  -6   2    0.30    0.10
  -4   6   2    0.20    0.10
  -4   6   2    0.30    0.10
   4   6  -2    0.30    0.10
  -4   6   2    0.10    0.10
  -4   6   2    0.30    0.10
   4   6  -2    0.30    0.10
   3  -6  -2   20.70    0.70
  -3  -6   2   21.00    0.70
  -3  -6   2   20.70    0.70
   3  -6  -2   20.80    0.70
  -3   6   2   20.50    0.70
   3   6  -2   19.70    0.70
  -3   6   2   19.50    0.70
  -3   6   2   20.90    0.70
   3   6  -2   20.60    0.70
   3   6  -2   20.50    0.70
   3   6  -2   19.90    0.70
  -3   6   2   21.00    0.70
  -2  -6   2   24.20    0.80
   2  -6  -2   24.30    0.80
   2  -6  -2   23.20    0.80
  -2  -6   2   23.70    0.80
   2  -6  -2   24.90    0.80
  -2   6   2   24.30    0.80
   2   6  -2   22.60    0.80
   2   6  -2   23.10    0.80
  -2   6   2   23.50    0.80
   2   6  -2   23.40    0.80
  -2   6   2   23.90    0.80
   2   6  -2   23.60    0.80
   1  -6  -2    2.60    0.10
  -1  -6   2    2.70    0.20
  -1  -6   2    2.60    0.20
   1  -6  -2    2.50    0.20
  -1   6   2    2.40    0.20
   1   6  -2    2.40    0.20
  -1   6   2    2.60    0.20
   1   6  -2    2.70    0.20
  -1   6   2    2.60    0.20
   1   6  -2    2.40    0.20
   1   6  -2    2.60    0.20
  -1   6   2    2.50    0.20
   0  -6   2   10.60    0.40
   0  -6   2   11.50    0.40
   0  -6  -2   11.30    0.40
   0  -6   2   10.70    0.40
   0  -6  -2   11.10    0.40
   0   6   2   11.10    0.40
   0   6   2   10.50    0.40
   0   6   2   10.80    0.40
   0   6   2   10.60    0.40
   0   6  -2   10.50    0.40
   0   6  -2   10.50    0.40
   0   6  -2   10.80    0.40
   0   6  -2   10.90    0.40
  -1  -6  -2   68.89    2.10
  -1  -6  -2   66.29    2.00
   1  -6   2   61.79    2.00
   1  -6   2   65.59    2.10
   1  -6   2   69.29    2.00
   1   6   2   68.99    2.00
   1   6   2   67.59    2.10
   1   6   2   67.09    2.00
   1   6   2   68.29    2.00
  -1   6  -2   67.29    2.10
  -1   6  -2   67.49    2.00
  -2  -6  -2   24.60    0.80
  -2  -6  -2   25.40    0.80
   2  -6   2   23.50    0.80
   2  -6   2   25.50    0.80
   2  -6   2   23.10    0.80
   2   6   2   25.80    0.80
   2   6   2   25.30    0.80
   2   6   2   24.60    0.80
  -2   6  -2   25.70    0.80
   2   6   2   26.30    0.80
  -2   6  -2   24.60    0.80
  -3  -6  -2   65.09    2.10
   3  -6   2   73.89    2.20
   3  -6   2   65.29    2.10
  -3  -6  -2   73.99    2.20
   3   6   2   70.49    2.20
  -3   6  -2   73.29    2.20
   3   6   2   73.89    2.10
   3   6   2   73.69    2.20
  -3   6  -2   70.89    2.20
   3   6   2   76.59    2.20
  -4  -6  -2   15.10    0.50
   4  -6   2   15.50    0.50
   4   6   2   15.00    0.50
  -4   6  -2   14.30    0.50
   4   6   2   13.70    0.50
  -4   6  -2   13.70    0.50
   4   6   2   14.90    0.50
   4   6   2   14.90    0.50
   5  -6   2    1.90    0.10
  -5  -6  -2    2.00    0.20
   5   6   2    1.90    0.10
  -5   6  -2    2.40    0.20
  -5   6  -2    2.30    0.20
   5   6   2    2.10    0.10
   6   6   2    3.80    0.20
  -6   6  -2    3.40    0.20
 -17   0   3    0.00    0.10
  17   0  -3    0.00    0.10
  17   0  -3    0.00    0.10
  16   0  -3   -0.10    0.10
 -16   0   3    0.10    0.10
  16   0  -3    0.00    0.10
  15   0  -3    0.00    0.10
 -15   0   3    0.00    0.10
 -15   0   3    0.10    0.10
  15   0  -3    0.30    0.10
 -14   0   3    0.10    0.10
 -14   0   3    0.10    0.10
  14   0  -3    0.10    0.10
 -14   0   3   -0.10    0.10
  14   0  -3    0.10    0.10
  14   0  -3    0.10    0.10
 -14   0   3    0.10    0.10
 -13   0   3    0.40    0.10
 -13   0   3    0.00    0.10
 -13   0   3   -0.10    0.10
 -13   0   3    0.00    0.10
  13   0  -3    0.00    0.10
  13   0  -3    0.00    0.10
  13   0  -3    0.10    0.10
 -13   0   3    0.00    0.10
 -12   0   3    0.10    0.10
 -12   0   3    0.00    0.10
 -12   0   3    0.10    0.10
 -12   0   3   -0.10    0.10
  12   0  -3    0.00    0.10
 -12   0   3    0.10    0.10
  12   0  -3    0.00    0.20
  12   0  -3    0.00    0.10
  11   0  -3    0.00    0.10
 -11   0   3    0.00    0.10
 -11   0   3    0.00    0.10
  11   0  -3   -0.20    0.20
 -11   0   3    0.10    0.10
 -11   0   3    0.00    0.10
  11   0  -3   -0.10    0.10
 -11   0   3    0.00    0.10
 -10   0   3    0.00    0.10
  10   0  -3    0.00    0.10
  10   0  -3    0.00    0.10
  10   0  -3    0.30    0.20
  10   0  -3    0.00    0.10
   9   0  -3    0.00    0.10
   9   0  -3    0.10    0.10
   9   0  -3    0.10    0.20
   8   0  -3    0.00    0.10
   8   0  -3   -0.20    0.10
   7   0  -3    0.00    0.10
   7   0  -3   -0.10    0.10
   6   0  -3    0.00    0.10
   6   0  -3    0.00    0.10
   5   0  -3   -0.60    0.10
   5   0  -3   -0.60    0.10
  -5   0   3   -0.70    0.10
  -4   0   3    0.00    0.10
  -4   0   3    0.20    0.10
   4   0  -3    0.00    0.10
   4   0  -3    0.00    0.10
  -3   0   3   -1.90    0.10
  -3   0   3   -2.10    0.10
   3   0  -3   -1.80    0.10
   3   0  -3   -2.10    0.10
   2   0  -3    0.00    0.10
  -2   0   3    0.00    0.10
  -2   0   3    0.00    0.10
   0   0   3   -0.30    0.10
   1   0   3    0.00    0.10
  -1   0  -3   -0.10    0.10
   1   0   3   -0.10    0.10
   2   0   3   -0.10    0.10
  -2   0  -3    0.00    0.10
   3   0   3   -0.30    0.10
   3   0   3   -0.40    0.10
   4   0   3    0.30    0.10
   4   0   3    0.00    0.10
   5   0   3    0.00    0.10
   5   0   3    0.00    0.20
   6   0   3    0.40    0.20
   7   0   3    0.80    0.20
   8   0   3    0.10    0.10
   8   0   3    0.00    0.20
  -8   0  -3   -0.10    0.10
   9   0   3    0.00    0.10
  -9   0  -3    0.10    0.10
  -9   0  -3    1.10    0.20
   9   0   3    0.10    0.20
  -9   0  -3    0.00    0.10
  10   0   3    0.10    0.10
  10   0   3    0.20    0.10
 -10   0  -3    0.00    0.10
 -10   0  -3    0.10    0.10
 -10   0  -3    0.00    0.10
  11   0   3    0.00    0.10
  11   0   3    0.00    0.10
 -11   0  -3    0.00    0.10
 -11   0  -3    0.20    0.10
 -12   0  -3    0.00    0.10
  12   0   3    0.00    0.10
  12   0   3    0.10    0.10
 -13   0  -3    0.20    0.10
  13   0   3    0.10    0.10
 -14   0  -3    0.00    0.10
  14   0   3    0.00    0.10
 -15   0  -3    0.00    0.10
  15   0   3    0.00    0.10
  17  -1  -3   11.90    0.40
 -17  -1   3   12.30    0.40
  17  -1  -3   12.70    0.40
 -17   1   3   11.80    0.40
  17   1  -3   11.50    0.40
  17   1  -3   13.20    0.40
 -16  -1   3   48.60    1.50
  16  -1  -3   50.59    1.50
  16  -1  -3   48.50    1.50
  16   1  -3   51.69    1.50
  16   1  -3   48.30    1.50
 -16   1   3   45.70    1.50
 -16   1   3   50.19    1.50
 -16   1   3   48.70    1.50
  15  -1  -3    5.50    0.30
 -15  -1   3    5.30    0.30
  15  -1  -3    5.50    0.30
  15  -1  -3    5.20    0.20
  15   1  -3    5.50    0.30
 -15   1   3    5.10    0.30
 -15   1   3    5.30    0.30
 -15   1   3    4.90    0.30
  15   1  -3    5.70    0.30
 -15   1   3    5.20    0.20
 -14  -1   3   46.20    1.40
  14  -1  -3   45.60    1.40
  14  -1  -3   45.80    1.40
 -14   1   3   46.60    1.40
  14   1  -3   46.80    1.40
 -14   1   3   44.70    1.40
  14   1  -3   44.20    1.40
 -14   1   3   41.80    1.40
 -14   1   3   44.60    1.40
 -14   1   3   44.10    1.40
  13  -1  -3    4.10    0.20
 -13  -1   3    4.10    0.30
  13  -1  -3    4.20    0.30
  13   1  -3    3.80    0.30
 -13   1   3    3.70    0.20
 -13   1   3    4.00    0.20
  13   1  -3    3.90    0.20
 -13   1   3    3.80    0.20
 -13   1   3    4.00    0.20
 -13   1   3    4.20    0.30
 -13   1   3    4.30    0.20
 -12  -1   3   47.50    1.50
  12  -1  -3   52.89    2.00
 -12  -1   3   45.80    1.50
  12  -1  -3   51.49    1.50
  12  -1  -3   49.90    1.50
  12   1  -3   48.60    1.90
  12   1  -3   49.60    1.50
 -12   1   3   49.70    1.50
 -12   1   3   46.70    1.50
 -12   1   3   48.00    1.50
  12   1  -3   47.60    1.50
  12   1  -3   51.49    1.50
 -12   1   3   47.30    1.50
 -12   1   3   49.10    1.50
 -12   1   3   48.60    1.50
 -11  -1   3  320.87    9.40
  11  -1  -3  332.07    9.30
  11  -1  -3  327.37    9.60
 -11  -1   3  303.27    9.40
 -11  -1   3  300.67    9.40
  11   1  -3  328.77    9.60
 -11   1   3  314.67    9.40
 -11   1   3  317.47    9.40
 -11   1   3  309.97    9.40
 -11   1   3  318.97    9.40
 -11   1   3  313.37    9.40
  11   1  -3  310.87    9.40
  11   1  -3  315.37    9.30
 -11   1   3  321.47    9.40
  11   1  -3  324.07    9.40
  10  -1  -3   16.10    0.50
 -10  -1   3   15.10    0.50
  10  -1  -3   16.70    0.70
 -10  -1   3   14.40    0.50
 -10   1   3   15.80    0.50
  10   1  -3   16.90    0.70
 -10   1   3   15.70    0.50
  10   1  -3   15.40    0.50
 -10   1   3   15.50    0.50
 -10   1   3   15.30    0.60
 -10   1   3   15.70    0.60
   9  -1  -3   56.89    1.70
   9  -1  -3   59.99    1.90
   9  -1  -3   58.99    1.90
   9   1  -3   52.29    1.90
   9   1  -3   60.79    1.90
   8  -1  -3  217.68    6.30
   8  -1  -3  210.68    6.30
   8   1  -3  219.58    6.30
   8   1  -3  191.68    6.30
   7  -1  -3   43.60    1.40
   7  -1  -3   43.60    1.40
   7   1  -3   42.20    1.50
   7   1  -3   44.40    1.40
   6  -1  -3  436.36   13.10
   6  -1  -3  456.05   13.10
   6   1  -3  463.35   13.10
   6   1  -3  424.36   13.20
   5  -1  -3  346.17   10.10
  -5  -1   3  334.97   10.10
   5  -1  -3  340.67   10.00
   5   1  -3  345.37   10.10
   5   1  -3  337.77   10.10
   4  -1  -3  410.26   11.90
  -4  -1   3  387.66   11.90
  -4  -1   3  402.36   11.80
   4  -1  -3  407.76   11.80
   4   1  -3  392.76   11.80
  -4   1   3  402.16   11.80
   4   1  -3  412.96   11.90
  -3  -1   3  279.67    8.20
  -3  -1   3  285.97    8.20
   3  -1  -3  285.87    8.20
  -3   1   3  283.87    8.20
   3   1  -3  281.57    8.20
   3   1  -3  249.08    8.20
  -2  -1   3  172.98    5.10
  -2  -1   3  174.18    5.10
   2   1  -3  175.58    5.10
   2   1  -3  163.88    5.10
  -2   1   3  170.68    5.10
  -1  -1   3   12.80    0.50
   1  -1  -3   13.10    0.40
  -1  -1   3   12.80    0.40
   1   1  -3   13.40    0.50
  -1   1   3   12.70    0.40
   1   1  -3   12.90    0.50
   0  -1   3 1828.42   54.59
   0  -1  -3 1885.71   58.99
   0  -1   3 1867.71   54.59
   0   1   3 1874.01   54.49
   0   1   3 1806.82   54.29
   1  -1   3 9514.25  290.57
  -1  -1  -3 9657.53  292.17
   1  -1   3 9999.00  294.87
   1   1   3 9750.92  290.87
   1   1   3 9334.87  289.97
   2  -1   3   96.09    2.90
   2  -1   3  100.19    2.90
  -2  -1  -3   91.69    2.90
   2   1   3   96.99    2.90
   2   1   3   92.79    2.90
   3  -1   3   39.60    1.30
   3  -1   3   37.90    1.20
   3   1   3   36.70    1.20
   3   1   3   39.80    1.20
   4  -1   3  119.39    3.60
   4  -1   3  113.49    3.60
   4   1   3  121.39    3.60
   5  -1   3  928.31   28.40
   5  -1   3  974.40   28.30
   5   1   3  989.20   28.30
   6  -1   3  168.98    5.60
   6  -1   3  184.98    5.50
   6   1   3  195.08    5.50
   7  -1   3    4.00    0.20
   7  -1   3    4.10    0.40
   7   1   3    4.20    0.40
   7   1   3    4.30    0.20
  -7   1  -3    3.80    0.20
   8  -1   3   14.60    0.50
   8  -1   3   14.40    0.50
  -8  -1  -3   14.60    0.50
   8  -1   3   14.60    0.70
   8   1   3   15.40    0.70
   8   1   3   15.20    0.50
   8   1   3   14.50    0.50
  -8   1  -3   14.30    0.50
  -8   1  -3   14.50    0.50
  -8   1  -3   14.70    0.50
  -9  -1  -3  176.98    5.30
   9  -1   3  172.38    5.50
   9  -1   3  184.88    5.30
   9  -1   3  188.08    5.30
  -9   1  -3  184.38    5.30
   9   1   3  177.88    5.50
   9   1   3  181.08    5.30
  -9   1  -3  176.48    5.30
   9   1   3  168.68    5.30
  -9   1  -3  174.58    5.30
  10  -1   3   20.10    0.70
 -10  -1  -3   20.10    0.70
 -10   1  -3   21.50    0.70
 -10   1  -3   20.90    0.70
  10   1   3   20.40    0.70
 -10   1  -3   20.30    0.70
  10   1   3   21.40    0.70
  11  -1   3   10.40    0.50
  11  -1   3   10.60    0.40
 -11  -1  -3   10.50    0.40
  11   1   3   10.40    0.40
 -11   1  -3   10.50    0.40
  11   1   3   10.70    0.40
 -11   1  -3   10.10    0.40
  12  -1   3  146.29    4.30
 -12  -1  -3  147.49    4.30
  12   1   3  145.29    4.30
  12   1   3  147.29    4.30
 -12   1  -3  140.39    4.30
 -12   1  -3  140.89    4.30
 -13  -1  -3   57.49    1.70
  13  -1   3   54.99    1.70
  13   1   3   54.79    1.70
 -13   1  -3   54.59    1.70
  13   1   3   53.59    1.70
  14  -1   3    0.10    0.10
 -14  -1  -3    0.30    0.10
  14   1   3    0.30    0.10
 -14   1  -3    0.10    0.10
 -15  -1  -3    3.60    0.20
 -17  -2   3    1.80    0.10
  17   2  -3    2.00    0.10
 -16  -2   3   31.40    1.00
  16  -2  -3   31.00    1.00
  16  -2  -3   33.60    1.00
  16   2  -3   30.50    1.00
 -16   2   3   29.00    1.00
 -16   2   3   31.30    1.00
 -16   2   3   33.00    1.00
  16   2  -3   32.70    1.00
 -16   2   3   31.30    1.00
 -15  -2   3    9.50    0.40
  15  -2  -3    9.50    0.30
  15  -2  -3    8.80    0.40
 -15   2   3    9.00    0.40
 -15   2   3    9.30    0.40
  15   2  -3    8.70    0.40
  15   2  -3    9.30    0.40
 -15   2   3    9.30    0.40
 -15   2   3    9.50    0.40
  14  -2  -3   49.40    1.50
 -14  -2   3   51.09    1.60
  14  -2  -3   48.40    1.50
 -14   2   3   48.10    1.60
 -14   2   3   49.90    1.50
 -14   2   3   48.10    1.50
 -14   2   3   50.99    1.60
  14   2  -3   50.29    1.60
  14   2  -3   48.70    1.50
 -14   2   3   48.90    1.50
  13  -2  -3    1.90    0.20
 -13  -2   3    1.80    0.20
  13  -2  -3    1.70    0.20
 -13   2   3    2.60    0.20
  13   2  -3    1.60    0.20
 -13   2   3    1.90    0.20
 -13   2   3    2.10    0.20
  13   2  -3    1.70    0.20
 -13   2   3    2.00    0.20
 -13   2   3    1.90    0.20
 -12  -2   3   77.19    2.40
 -12   2   3   76.99    2.40
 -12   2   3   80.69    2.40
 -12   2   3   76.69    2.40
 -12   2   3   77.39    2.40
  12   2  -3   78.59    2.40
 -12   2   3   78.69    2.40
  12   2  -3   75.29    2.40
  11  -2  -3 2846.42   82.69
  11  -2  -3 2633.74   82.79
 -11  -2   3 2857.61   82.79
  11   2  -3 2847.32   82.69
  11   2  -3 2739.53   82.79
 -11   2   3 2815.62   82.79
 -11   2   3 2807.82   82.69
 -11   2   3 2866.11   82.69
 -11   2   3 2943.01   82.79
 -11   2   3 2888.51   82.69
 -10  -2   3   77.79    2.60
  10  -2  -3   84.79    2.80
  10  -2  -3   83.89    2.60
 -10  -2   3   87.19    2.60
 -10   2   3   90.49    2.60
 -10   2   3   86.09    2.60
 -10   2   3   86.49    2.60
 -10   2   3   88.69    2.60
  10   2  -3   82.99    2.60
  10   2  -3   87.79    2.60
  10   2  -3   83.99    2.60
 -10   2   3   85.99    2.60
  -9  -2   3    8.10    0.30
   9  -2  -3    8.70    0.30
   9  -2  -3    8.90    0.50
  -9  -2   3    7.10    0.30
  -9   2   3    8.10    0.30
   9   2  -3    7.80    0.30
  -9   2   3    8.30    0.30
  -9   2   3    8.40    0.30
  -9   2   3    9.00    0.40
   9   2  -3    8.20    0.30
   9   2  -3    8.30    0.50
  -9   2   3    8.30    0.30
   8  -2  -3  129.39    4.00
   8  -2  -3  132.89    4.00
   8   2  -3  132.39    4.00
  -8   2   3  126.29    3.90
   7  -2  -3    3.20    0.20
   7  -2  -3    3.30    0.30
   7   2  -3    2.80    0.20
   6  -2  -3    5.80    0.30
   6  -2  -3    5.00    0.30
   6   2  -3    5.20    0.30
   5  -2  -3    0.20    0.10
  -5  -2   3    0.30    0.10
   5  -2  -3    0.20    0.10
   5   2  -3    0.40    0.10
   4  -2  -3   78.19    2.30
  -4  -2   3   77.49    2.40
   4  -2  -3   74.59    2.30
   4  -2  -3   75.99    2.30
   4   2  -3   77.59    2.40
   4   2  -3   74.09    2.30
   3  -2  -3  355.96   10.60
   3  -2  -3  369.26   10.60
  -3  -2   3  363.26   10.60
   3  -2  -3  350.06   10.60
   3   2  -3  340.07   10.50
   3   2  -3  376.16   10.70
   2  -2  -3   29.10    0.90
   2  -2  -3   30.00    0.90
  -2  -2   3   29.20    1.00
   2  -2  -3   32.00    0.90
  -2   2   3   29.10    0.90
   2   2  -3   27.90    0.90
   2   2  -3   29.70    1.00
   1  -2  -3    4.00    0.20
  -1  -2   3    4.00    0.30
   1  -2  -3    4.00    0.20
  -1   2   3    3.60    0.20
   1   2  -3    3.90    0.30
   0  -2   3    6.50    0.30
   0  -2  -3    6.60    0.30
   0  -2  -3    6.40    0.30
   0  -2   3    6.10    0.20
   0   2   3    6.00    0.20
   1  -2   3    0.50    0.10
   1  -2   3    0.70    0.10
   2  -2   3  250.67    7.50
   2  -2   3  263.87    7.60
   2   2   3  245.18    7.50
   3  -2   3  252.57    7.40
   3  -2   3  240.88    7.30
   3   2   3  247.28    7.30
   4  -2   3 2919.11   85.19
   4  -2   3 2943.21   85.49
   4   2   3 2821.12   84.99
  -5  -2  -3  136.59    3.80
   5  -2   3  128.79    4.00
   5  -2   3  131.29    3.80
   5  -2   3  134.99    4.00
   5   2   3  117.99    3.90
   6  -2   3   50.39    1.70
   6  -2   3   50.29    1.80
   6  -2   3   53.49    1.60
  -6  -2  -3   51.39    1.60
   6   2   3   52.69    1.60
  -6   2  -3   52.19    1.60
   6   2   3   51.59    1.70
   7  -2   3   69.99    2.30
  -7  -2  -3   69.69    2.10
  -7  -2  -3   68.29    2.20
   7  -2   3   73.79    2.20
   7   2   3   71.49    2.20
   7   2   3   72.89    2.20
   7   2   3   72.39    2.30
  -7   2  -3   73.19    2.20
  -7   2  -3   72.09    2.20
  -7   2  -3   70.69    2.20
   8  -2   3   26.30    0.80
  -8  -2  -3   26.70    0.90
   8  -2   3   25.20    1.00
   8   2   3   27.30    0.90
  -8   2  -3   25.90    0.90
  -8   2  -3   26.80    0.90
   8   2   3   26.20    0.90
  -8   2  -3   27.20    0.90
  -9  -2  -3   33.60    1.10
   9  -2   3   31.60    1.00
   9   2   3   33.80    1.10
   9   2   3   32.50    1.10
  -9   2  -3   32.10    1.10
  -9   2  -3   34.20    1.10
  -9   2  -3   34.00    1.10
 -10  -2  -3  133.39    3.90
  10  -2   3  124.19    3.90
  10  -2   3  134.59    3.90
 -10   2  -3  129.69    3.90
  10   2   3  132.79    3.90
 -10   2  -3  134.89    3.90
 -10   2  -3  135.79    3.90
  10   2   3  122.99    3.90
  11  -2   3    4.50    0.30
 -11  -2  -3    4.50    0.30
 -11   2  -3    4.60    0.30
  11   2   3    4.10    0.20
 -11   2  -3    4.20    0.20
  11   2   3    4.40    0.20
 -11   2  -3    4.20    0.20
  12  -2   3   68.69    2.10
 -12  -2  -3   69.69    2.20
 -12   2  -3   70.29    2.10
 -12   2  -3   71.79    2.10
  12   2   3   70.99    2.10
  12   2   3   69.09    2.10
 -13  -2  -3    6.10    0.30
  13  -2   3    5.60    0.30
 -13   2  -3    6.10    0.30
 -13   2  -3    5.70    0.20
  13   2   3    6.00    0.30
  13   2   3    5.80    0.30
 -14  -2  -3   12.20    0.40
  14  -2   3   10.70    0.40
 -14   2  -3   11.50    0.40
  14   2   3   11.30    0.40
 -14   2  -3   10.80    0.40
  15  -3  -3    0.10    0.10
 -15  -3   3    0.10    0.10
  15  -3  -3    0.10    0.10
  15   3  -3    0.10    0.10
 -15   3   3    0.20    0.10
 -15   3   3    0.10    0.10
  15   3  -3    0.10    0.10
 -15   3   3    0.00    0.10
 -15   3   3    0.40    0.10
 -15   3   3    0.10    0.10
 -14  -3   3   27.10    0.90
  14  -3  -3   26.40    0.90
  14  -3  -3   28.40    0.90
  14   3  -3   27.00    0.90
 -14   3   3   26.90    0.90
 -14   3   3   27.20    0.90
 -14   3   3   27.50    0.90
  14   3  -3   28.70    0.90
 -14   3   3   28.40    0.90
 -14   3   3   26.90    0.90
  13  -3  -3   59.29    1.80
 -13  -3   3   57.79    1.90
  13   3  -3   60.99    1.90
 -13   3   3   61.39    1.80
 -13   3   3   59.99    1.80
  13   3  -3   58.79    1.80
 -13   3   3   61.09    1.90
 -13   3   3   61.19    1.80
 -13   3   3   60.69    1.90
 -12  -3   3  183.68    5.40
  12  -3  -3  181.28    5.40
 -12   3   3  183.58    5.40
 -12   3   3  186.28    5.40
 -12   3   3  180.78    5.50
  12   3  -3  187.88    5.50
  12   3  -3  180.88    5.40
 -12   3   3  182.18    5.40
 -12   3   3  177.18    5.40
 -11  -3   3   19.10    0.70
  11  -3  -3   19.40    0.60
  11   3  -3   19.70    0.70
 -11   3   3   19.00    0.70
  11   3  -3   18.60    0.70
 -11   3   3   20.10    0.70
 -11   3   3   19.40    0.70
 -11   3   3   20.10    0.70
 -11   3   3   19.20    0.70
 -10  -3   3    9.50    0.40
  10  -3  -3    9.50    0.40
 -10   3   3    9.80    0.40
 -10   3   3    9.80    0.40
 -10   3   3    9.60    0.40
 -10   3   3   10.00    0.40
 -10   3   3   10.00    0.40
  10   3  -3    9.30    0.40
  10   3  -3   10.10    0.40
   9  -3  -3  159.98    5.00
   9   3  -3  163.98    5.00
  -9   3   3  168.18    5.00
   9   3  -3  165.08    5.00
  -9   3   3  166.58    5.00
  -9   3   3  168.58    5.00
  -9   3   3  174.08    5.00
   9   3  -3  168.78    5.00
  -9   3   3  172.78    5.00
  -8   3   3  147.99    4.30
  -8   3   3  149.69    4.30
   8   3  -3  142.29    4.30
   8   3  -3  138.89    4.30
  -8   3   3  146.49    4.40
   8   3  -3  140.49    4.40
  -8   3   3  147.29    4.30
  -8   3   3  151.68    4.30
  -7  -3   3    0.80    0.10
   7   3  -3    0.60    0.10
  -7   3   3    0.70    0.10
  -7   3   3    0.80    0.10
   7   3  -3    0.70    0.10
   7   3  -3    0.70    0.10
  -7   3   3    0.70    0.10
   6  -3  -3   46.40    1.50
  -6   3   3   45.40    1.40
   6   3  -3   47.50    1.50
   6   3  -3   45.80    1.40
  -6   3   3   45.40    1.50
  -6   3   3   49.50    1.40
  -5  -3   3  483.55   14.80
   5  -3  -3  512.65   14.90
  -5   3   3  517.15   14.80
   4  -3  -3  175.78    5.10
  -4  -3   3  165.88    5.00
  -3  -3   3  365.56   10.80
   3  -3  -3  360.36   10.70
  -2  -3   3   36.90    1.30
   2  -3  -3   38.80    1.20
   1  -3  -3    9.90    0.40
  -1  -3   3    9.20    0.50
   0  -3   3    4.60    0.30
   0  -3   3    4.30    0.20
   0  -3  -3    4.90    0.30
   1  -3   3  319.07   10.40
   1  -3   3  354.66   10.20
  -1  -3  -3  368.46   10.30
  -2  -3  -3    7.60    0.40
   2  -3   3    7.30    0.30
   2  -3   3    6.70    0.40
  -2  -3  -3    7.30    0.30
   2   3   3    8.10    0.40
   3  -3   3   47.30    1.70
   3  -3   3   50.19    1.50
  -3  -3  -3   49.40    1.70
  -3  -3  -3   50.39    1.50
   3   3   3   49.40    1.50
   4  -3   3   34.60    1.30
  -4  -3  -3   36.20    1.30
   4  -3   3   38.30    1.10
  -4  -3  -3   39.10    1.10
   4  -3   3   36.60    1.10
   4   3   3   37.30    1.20
   4   3   3   37.50    1.20
   4   3   3   38.20    1.20
  -4   3  -3   36.00    1.20
  -4   3  -3   37.20    1.20
  -4   3  -3   37.80    1.20
  -4   3  -3   36.60    1.10
   5  -3   3   48.00    1.50
  -5  -3  -3   50.89    1.50
   5  -3   3   53.29    1.50
   5   3   3   50.59    1.50
  -5   3  -3   49.30    1.50
   5   3   3   47.40    1.50
  -5   3  -3   48.50    1.50
  -5   3  -3   48.90    1.50
   5   3   3   49.60    1.50
  -5   3  -3   48.20    1.50
  -5   3  -3   49.80    1.60
   5   3   3   48.60    1.50
   6  -3   3   19.40    0.70
   6  -3   3   21.40    0.70
  -6  -3  -3   20.70    0.70
   6   3   3   20.90    0.70
   6   3   3   19.80    0.70
  -6   3  -3   19.80    0.70
  -6   3  -3   20.70    0.70
   6   3   3   20.60    0.70
  -6   3  -3   20.50    0.70
  -6   3  -3   20.20    0.70
  -6   3  -3   20.90    0.70
  -7  -3  -3   18.60    0.60
  -7  -3  -3   17.50    0.60
   7  -3   3   18.30    0.60
   7   3   3   17.50    0.60
  -7   3  -3   17.90    0.70
  -7   3  -3   19.40    0.60
   7   3   3   18.70    0.60
  -7   3  -3   17.30    0.60
  -7   3  -3   17.70    0.60
  -7   3  -3   18.10    0.60
   8  -3   3   69.69    2.10
  -8  -3  -3   65.09    2.20
   8   3   3   69.79    2.20
   8   3   3   73.99    2.20
  -8   3  -3   71.69    2.20
  -8   3  -3   71.69    2.10
  -8   3  -3   70.99    2.20
  -9  -3  -3   39.10    1.20
   9  -3   3   37.80    1.20
  -9   3  -3   38.70    1.20
   9   3   3   36.90    1.20
  -9   3  -3   39.20    1.20
  -9   3  -3   39.60    1.20
   9   3   3   40.20    1.20
  -9   3  -3   37.00    1.20
 -10  -3  -3   69.09    2.10
  10  -3   3   65.89    2.10
 -10   3  -3   68.59    2.10
 -10   3  -3   71.09    2.10
  10   3   3   69.69    2.10
 -10   3  -3   69.39    2.10
  10   3   3   68.29    2.10
 -11  -3  -3   19.30    0.70
  11  -3   3   18.90    0.70
  11   3   3   18.70    0.70
 -11   3  -3   20.10    0.70
 -11   3  -3   20.00    0.70
  11   3   3   19.50    0.70
 -11   3  -3   19.90    0.70
 -12  -3  -3    0.50    0.10
  12  -3   3    0.40    0.10
  12   3   3    0.40    0.10
  12   3   3    0.50    0.10
 -12   3  -3    0.50    0.10
 -12   3  -3    0.30    0.10
 -13  -3  -3    8.40    0.30
 -13   3  -3    8.00    0.30
  13   3   3    7.60    0.30
 -13   3  -3    7.90    0.30
  14  -4  -3   29.90    1.10
 -14   4   3   33.10    1.00
 -14   4   3   35.70    1.00
 -14   4   3   32.90    1.00
  13  -4  -3  128.99    3.80
 -13   4   3  123.49    3.80
 -13   4   3  120.49    3.80
 -13   4   3  130.19    3.80
  13   4  -3  119.99    3.80
 -13   4   3  127.99    3.80
  13   4  -3  133.79    3.80
 -13   4   3  132.29    3.80
  12  -4  -3   55.69    1.70
 -12   4   3   52.19    1.70
 -12   4   3   56.49    1.70
  12   4  -3   55.19    1.70
 -12   4   3   55.09    1.70
  12   4  -3   52.09    1.70
 -12   4   3   54.79    1.70
 -12   4   3   55.19    1.70
  11  -4  -3    0.20    0.10
 -11   4   3   -0.10    0.10
 -11   4   3    0.00    0.10
 -11   4   3    0.30    0.10
  11   4  -3    0.00    0.10
 -11   4   3   -0.10    0.10
  11   4  -3    0.00    0.10
  10  -4  -3   42.20    1.30
  10   4  -3   42.90    1.40
 -10   4   3   43.80    1.40
  10   4  -3   41.70    1.30
 -10   4   3   42.50    1.40
 -10   4   3   43.10    1.30
 -10   4   3   44.10    1.30
   9  -4  -3  105.29    3.10
  -9   4   3  107.39    3.20
  -9   4   3  105.69    3.20
  -9   4   3  104.09    3.20
  -9   4   3  106.79    3.20
   9   4  -3  103.29    3.20
   9   4  -3  104.29    3.20
   8  -4  -3    1.00    0.10
  -8  -4   3    1.10    0.10
   8   4  -3    1.30    0.10
  -8   4   3    0.90    0.10
  -8   4   3    1.10    0.20
   8   4  -3    0.90    0.10
  -8   4   3    1.20    0.20
  -8   4   3    1.00    0.10
   8   4  -3    1.10    0.10
   8   4  -3    1.20    0.20
   7  -4  -3  119.49    3.60
  -7  -4   3  121.99    3.70
  -7   4   3  127.89    3.70
  -7   4   3  127.79    3.70
   7   4  -3  124.19    3.70
   7   4  -3  118.99    3.70
   7   4  -3  120.69    3.70
   7   4  -3  120.09    3.70
  -6  -4   3    4.40    0.30
   6  -4  -3    4.40    0.20
  -6   4   3    5.00    0.30
  -6   4   3    4.80    0.20
   6   4  -3    4.40    0.30
   6   4  -3    4.60    0.30
  -6   4   3    4.60    0.20
   6   4  -3    4.50    0.30
  -6   4   3    4.40    0.30
   5  -4  -3    3.40    0.20
  -5  -4   3    3.20    0.20
  -5  -4   3    3.30    0.20
   5   4  -3    3.20    0.20
   5   4  -3    3.10    0.20
  -5   4   3    3.10    0.20
   5   4  -3    3.40    0.20
  -5   4   3    3.10    0.20
  -5   4   3    3.70    0.20
   5   4  -3    3.20    0.20
  -5   4   3    3.50    0.20
   5   4  -3    3.10    0.20
  -4  -4   3    4.70    0.20
  -4  -4   3    4.80    0.30
  -4   4   3    5.70    0.30
   4   4  -3    4.70    0.30
   4   4  -3    4.60    0.20
   4   4  -3    4.50    0.30
   4   4  -3    4.50    0.20
  -4   4   3    4.50    0.20
  -4   4   3    4.80    0.30
   4   4  -3    4.70    0.30
  -4   4   3    4.80    0.20
   3  -4  -3  283.07    7.90
  -3  -4   3  275.27    8.00
  -3  -4   3  265.97    7.90
  -3   4   3  262.47    8.00
  -3   4   3  281.37    8.00
  -3   4   3  273.77    7.90
   3   4  -3  266.67    8.00
   3   4  -3  263.17    8.00
  -3   4   3  268.47    8.00
  -3   4   3  277.17    8.00
   3   4  -3  269.47    7.90
   3   4  -3  251.07    7.90
   3   4  -3  264.67    8.00
  -2  -4   3    7.50    0.30
  -2  -4   3    7.40    0.30
   2  -4  -3    7.00    0.30
  -2   4   3    7.20    0.30
   2   4  -3    7.10    0.30
  -2   4   3    7.00    0.30
  -2   4   3    7.20    0.30
   2   4  -3    7.30    0.30
   2   4  -3    7.10    0.30
   2   4  -3    6.90    0.30
  -2   4   3    7.40    0.30
  -2   4   3    7.40    0.30
   2   4  -3    7.00    0.30
  -1  -4   3   55.99    1.80
   1  -4  -3   56.49    1.70
  -1  -4   3   55.69    1.70
   1   4  -3   54.09    1.70
   1   4  -3   57.59    1.70
   1   4  -3   56.69    1.70
   1   4  -3   53.69    1.70
  -1   4   3   56.49    1.70
  -1   4   3   56.09    1.70
   1   4  -3   54.69    1.70
  -1   4   3   57.19    1.70
  -1   4   3   55.29    1.70
   0  -4   3  207.78    6.00
   0  -4  -3  202.08    6.00
   0  -4   3  198.68    6.00
   0   4  -3  204.38    6.00
   0   4   3  209.78    6.00
   0   4   3  201.98    6.00
   0   4  -3  203.38    6.00
   0   4   3  203.08    6.00
   0   4  -3  203.38    6.00
   0   4  -3  198.58    6.00
   0   4  -3  205.08    6.00
   0   4   3  198.78    6.00
   1  -4   3   64.39    2.10
   1  -4   3   67.69    2.00
  -1  -4  -3   68.49    2.00
  -1   4  -3   68.49    2.00
   1   4   3   65.79    2.00
  -1   4  -3   64.39    2.00
  -1   4  -3   68.09    2.10
   1   4   3   69.59    2.00
  -1   4  -3   66.69    2.00
   1   4   3   65.59    2.10
   1   4   3   64.79    2.00
  -2  -4  -3   82.39    2.30
   2  -4   3   76.09    2.30
   2  -4   3   73.39    2.40
   2  -4   3   80.89    2.30
  -2   4  -3   76.79    2.40
   2   4   3   78.79    2.40
   2   4   3   76.69    2.40
   2   4   3   76.79    2.40
  -2   4  -3   78.39    2.40
  -2   4  -3   81.19    2.30
   2   4   3   74.39    2.30
  -2   4  -3   77.89    2.30
   3  -4   3    0.30    0.10
   3  -4   3    0.40    0.10
  -3  -4  -3    0.30    0.10
  -3   4  -3    0.40    0.10
   3   4   3    0.20    0.10
  -3   4  -3    0.30    0.10
  -3   4  -3    0.60    0.10
   3   4   3    0.60    0.10
   3   4   3    0.70    0.10
   3   4   3    0.30    0.10
  -3   4  -3    0.20    0.10
   4  -4   3    2.40    0.20
  -4  -4  -3    2.40    0.10
   4   4   3    2.00    0.20
  -4   4  -3    2.30    0.20
   4   4   3    3.00    0.20
   4   4   3    2.10    0.20
  -4   4  -3    1.90    0.20
  -4   4  -3    1.90    0.20
   4   4   3    1.90    0.20
  -4   4  -3    2.50    0.20
  -4   4  -3    2.20    0.20
   5  -4   3    3.00    0.20
  -5  -4  -3    2.90    0.20
   5  -4   3    3.00    0.20
  -5   4  -3    3.00    0.20
   5   4   3    3.30    0.30
   5   4   3    3.20    0.20
  -5   4  -3    3.10    0.20
   5   4   3    3.00    0.20
  -5   4  -3    3.20    0.20
  -5   4  -3    3.20    0.20
   5   4   3    3.10    0.20
   6  -4   3    5.00    0.20
   6  -4   3    5.20    0.30
  -6  -4  -3    5.20    0.20
  -6   4  -3    5.20    0.20
  -6   4  -3    5.00    0.30
   6   4   3    5.50    0.30
   6   4   3    5.30    0.30
  -6   4  -3    5.00    0.30
  -6   4  -3    5.10    0.30
   6   4   3    5.20    0.30
   7  -4   3   13.60    0.50
  -7  -4  -3   12.50    0.50
  -7   4  -3   13.20    0.50
  -7   4  -3   13.80    0.50
  -7   4  -3   13.70    0.50
   7   4   3   13.50    0.50
  -7   4  -3   13.30    0.50
   7   4   3   13.50    0.50
   7   4   3   13.80    0.50
  -7   4  -3   12.80    0.50
   8  -4   3   97.39    3.00
   8   4   3   98.49    3.00
  -8   4  -3  101.09    3.00
  -8   4  -3   94.69    3.00
  -8   4  -3   98.29    3.00
   8   4   3  102.89    3.00
  -8   4  -3   99.39    3.00
  -9   4  -3  104.39    3.20
   9   4   3  110.09    3.30
  -9   4  -3  108.39    3.20
  -9   4  -3  111.39    3.30
   9   4   3  108.69    3.30
  -9   4  -3  107.39    3.30
  10  -4   3   55.59    1.80
 -10   4  -3   60.89    1.80
 -10   4  -3   56.59    1.80
 -10   4  -3   58.09    1.80
  10   4   3   58.19    1.80
 -10   4  -3   56.09    1.80
  10   4   3   60.09    1.80
  11   4   3   10.50    0.40
  11   4   3   10.50    0.40
 -11   4  -3   10.00    0.40
 -11   4  -3   10.30    0.40
 -12   4  -3   94.79    2.80
  11  -5  -3    0.30    0.10
 -11   5   3    0.20    0.10
 -11   5   3    0.20    0.10
 -11   5   3    0.30    0.10
  11   5  -3    0.30    0.10
  10  -5  -3    3.60    0.20
 -10   5   3    3.40    0.20
 -10   5   3    3.40    0.20
 -10   5   3    3.40    0.20
  10   5  -3    3.60    0.20
   9  -5  -3   10.70    0.40
  -9   5   3   10.60    0.40
   9   5  -3   10.40    0.40
  -9   5   3    9.80    0.40
  -9   5   3   10.30    0.40
  -8  -5   3   41.40    1.30
   8  -5  -3   42.90    1.30
  -8   5   3   43.60    1.30
  -8   5   3   42.10    1.30
   8   5  -3   37.30    1.30
  -8   5   3   42.90    1.30
   8   5  -3   41.80    1.30
   7  -5  -3    4.20    0.20
  -7  -5   3    4.00    0.30
   7   5  -3    4.30    0.20
  -7   5   3    4.10    0.20
   7   5  -3    3.80    0.20
  -7   5   3    4.20    0.20
   7   5  -3    3.90    0.20
  -7   5   3    4.30    0.30
   6  -5  -3    8.90    0.30
  -6  -5   3    9.20    0.40
   6   5  -3    8.20    0.30
  -6   5   3    8.40    0.40
  -6   5   3    8.70    0.30
   6   5  -3    8.40    0.40
   6   5  -3    8.70    0.40
  -6   5   3    8.70    0.40
  -6   5   3    8.80    0.40
  -5  -5   3   12.10    0.50
   5  -5  -3   12.10    0.40
  -5  -5   3   11.10    0.40
   5   5  -3   11.30    0.40
   5   5  -3   10.90    0.40
  -5   5   3   11.20    0.50
  -5   5   3   11.90    0.40
   5   5  -3   11.10    0.40
  -5   5   3   11.70    0.40
   5   5  -3   11.50    0.40
  -5   5   3   11.60    0.40
  -4  -5   3    2.80    0.20
   4  -5  -3    2.90    0.20
  -4  -5   3    3.30    0.30
  -4   5   3    3.10    0.20
  -4   5   3    2.90    0.20
  -4   5   3    3.10    0.20
  -4   5   3    2.90    0.20
   4   5  -3    2.90    0.20
   4   5  -3    2.80    0.20
   4   5  -3    2.90    0.20
   4   5  -3    2.70    0.20
   3  -5  -3    3.60    0.20
  -3  -5   3    3.20    0.20
  -3  -5   3    3.20    0.20
  -3  -5   3    3.60    0.30
  -3   5   3    3.40    0.20
  -3   5   3    3.70    0.20
   3   5  -3    3.30    0.20
   3   5  -3    3.20    0.20
  -3   5   3    3.50    0.20
   3   5  -3    3.10    0.20
  -3   5   3    3.20    0.20
   3   5  -3    3.00    0.20
  -3   5   3    3.40    0.20
  -2  -5   3   34.10    1.10
  -2  -5   3   33.10    1.00
   2  -5  -3   33.60    1.00
  -2  -5   3   33.10    1.10
   2   5  -3   33.90    1.10
   2   5  -3   32.50    1.10
   2   5  -3   32.50    1.00
  -2   5   3   32.40    1.10
  -2   5   3   34.10    1.10
  -2   5   3   34.70    1.20
   2   5  -3   33.00    1.10
  -2   5   3   33.60    1.10
  -2   5   3   33.20    1.10
  -1  -5   3  230.98    6.80
   1  -5  -3  228.58    6.80
  -1  -5   3  235.98    6.90
  -1  -5   3  223.78    6.80
   1   5  -3  233.18    6.80
   1   5  -3  231.18    6.80
  -1   5   3  233.58    6.80
  -1   5   3  229.98    6.80
  -1   5   3  236.78    6.90
   1   5  -3  226.68    6.90
   1   5  -3  228.68    6.80
  -1   5   3  231.68    6.90
   0  -5  -3   61.79    1.90
   0  -5   3   58.99    1.90
   0  -5   3   61.69    1.90
   0  -5   3   60.99    1.90
   0   5  -3   61.99    1.90
   0   5   3   63.19    1.90
   0   5   3   60.19    1.90
   0   5   3   61.79    1.90
   0   5  -3   60.29    1.90
   0   5  -3   60.29    1.90
   0   5   3   59.69    1.90
   0   5  -3   60.89    1.90
  -1  -5  -3  159.38    4.60
   1  -5   3  155.88    4.60
   1  -5   3  150.98    4.60
   1  -5   3  153.38    4.60
   1   5   3  153.28    4.60
  -1   5  -3  160.68    4.60
   1   5   3  156.98    4.60
  -1   5  -3  148.89    4.60
   1   5   3  155.58    4.60
   1   5   3  151.88    4.60
  -1   5  -3  148.69    4.60
  -1   5  -3  159.18    4.60
   2  -5   3   33.50    1.10
  -2  -5  -3   33.90    1.00
   2  -5   3   32.00    1.10
   2  -5   3   33.00    1.00
  -2   5  -3   31.60    1.10
  -2   5  -3   33.70    1.00
  -2   5  -3   34.70    1.10
  -2   5  -3   30.60    1.00
   2   5   3   33.40    1.10
   2   5   3   32.00    1.00
   2   5   3   32.60    1.10
   2   5   3   32.50    1.10
   3  -5   3    3.10    0.20
  -3  -5  -3    3.30    0.20
   3  -5   3    3.10    0.20
  -3   5  -3    3.30    0.20
   3   5   3    3.20    0.20
   3   5   3    2.90    0.20
  -3   5  -3    3.00    0.20
  -3   5  -3    3.10    0.20
   3   5   3    3.00    0.20
   3   5   3    3.20    0.30
   4  -5   3    1.80    0.20
  -4  -5  -3    1.80    0.10
   4  -5   3    1.70    0.10
  -4   5  -3    1.90    0.20
   4   5   3    1.70    0.20
   4   5   3    1.70    0.20
   4   5   3    2.10    0.20
  -4   5  -3    1.70    0.20
   4   5   3    2.00    0.20
  -4   5  -3    1.80    0.10
  -5  -5  -3    2.10    0.10
   5  -5   3    2.20    0.20
   5  -5   3    2.00    0.10
   5   5   3    2.30    0.20
   5   5   3    2.20    0.20
  -5   5  -3    2.00    0.20
   5   5   3    2.00    0.20
   5   5   3    2.20    0.20
  -5   5  -3    1.90    0.20
   6  -5   3   57.29    1.80
   6  -5   3   59.99    1.80
  -6  -5  -3   54.09    1.80
  -6   5  -3   60.49    1.80
   6   5   3   61.39    1.80
   6   5   3   61.19    1.80
   6   5   3   63.69    1.80
   7  -5   3    4.80    0.20
  -7  -5  -3    5.10    0.30
   7   5   3    5.20    0.20
  -7   5  -3    4.90    0.20
   7   5   3    5.20    0.20
   7   5   3    5.10    0.30
  -7   5  -3    4.80    0.30
  -8   5  -3   16.20    0.60
   8   5   3   16.50    0.50
   8   5   3   16.90    0.50
  -8   5  -3   15.70    0.50
   9   5   3    4.70    0.20
  -9   5  -3    5.00    0.20
  -9   5  -3    5.60    0.20
   9   5   3    5.30    0.20
  -7  -6   3   24.40    0.80
  -7   6   3   23.60    0.80
   7   6  -3   25.20    0.80
  -7   6   3   23.20    0.80
  -7   6   3   25.70    0.80
   6  -6  -3    7.70    0.30
  -6  -6   3    7.00    0.30
  -6   6   3    7.20    0.30
   6   6  -3    7.10    0.30
  -6   6   3    6.90    0.30
  -6   6   3    7.10    0.30
   5  -6  -3   15.90    0.50
   5  -6  -3   15.80    0.50
  -5  -6   3   16.70    0.60
   5   6  -3   15.70    0.50
  -5   6   3   15.20    0.50
  -5   6   3   15.40    0.50
  -5   6   3   15.60    0.50
  -5   6   3   16.30    0.50
   4  -6  -3   12.80    0.40
   4  -6  -3   12.90    0.40
  -4  -6   3   13.20    0.50
  -4  -6   3   12.30    0.40
  -4   6   3   13.00    0.40
   4   6  -3   12.40    0.40
  -4   6   3   12.80    0.40
  -4   6   3   12.50    0.40
   4   6  -3   12.00    0.40
   3  -6  -3    1.00    0.10
  -3  -6   3    1.00    0.10
  -3  -6   3    1.00    0.10
   3  -6  -3    1.00    0.10
  -3   6   3    1.30    0.10
  -3   6   3    1.20    0.10
  -3   6   3    1.00    0.10
   3   6  -3    1.10    0.10
   3   6  -3    1.10    0.10
  -2  -6   3   94.89    2.80
  -2  -6   3   95.09    2.80
   2  -6  -3   96.29    2.80
   2  -6  -3   89.79    2.80
  -2   6   3   95.39    2.80
   2   6  -3   90.79    2.80
  -2   6   3   93.49    2.80
  -2   6   3   93.99    2.80
  -2   6   3   87.49    2.80
   2   6  -3   87.99    2.80
   1  -6  -3    3.60    0.20
  -1  -6   3    3.70    0.20
  -1  -6   3    3.60    0.20
   1  -6  -3    3.70    0.20
  -1   6   3    3.50    0.20
   1   6  -3    4.10    0.20
  -1   6   3    3.40    0.20
  -1   6   3    3.60    0.20
  -1   6   3    3.50    0.20
   1   6  -3    3.50    0.20
   0  -6   3  127.39    3.90
   0  -6  -3  132.39    3.90
   0  -6   3  133.59    3.80
   0  -6  -3  132.99    3.80
   0   6  -3  124.79    3.90
   0   6   3  133.69    3.90
   0   6   3  127.19    3.80
   0   6   3  124.79    3.90
   0   6   3  129.99    3.80
   0   6  -3  125.69    3.80
  -1  -6  -3   68.69    2.10
   1  -6   3   63.19    2.00
   1  -6   3   68.79    2.00
  -1  -6  -3   66.29    2.00
   1   6   3   68.09    2.00
  -1   6  -3   64.99    2.00
   1   6   3   68.09    2.00
   1   6   3   67.09    2.00
  -1   6  -3   67.19    2.00
   1   6   3   67.59    2.00
   2  -6   3   10.00    0.40
  -2  -6  -3   10.50    0.40
  -2  -6  -3   10.30    0.40
   2   6   3    9.70    0.40
  -2   6  -3    9.50    0.40
   2   6   3   10.00    0.40
   2   6   3   10.20    0.40
  -2   6  -3   10.00    0.40
   2   6   3   10.40    0.40
  -3  -6  -3   38.70    1.30
   3  -6   3   43.60    1.30
  -3  -6  -3   43.90    1.30
  -3   6  -3   43.40    1.30
   3   6   3   40.80    1.30
   3   6   3   44.00    1.30
   3   6   3   44.30    1.30
   3   6   3   44.60    1.30
   4  -6   3    0.80    0.10
  -4  -6  -3    1.00    0.10
   4   6   3    0.90    0.10
  -4   6  -3    0.70    0.10
   4   6   3    1.00    0.10
   4   6   3    0.70    0.10
   4   6   3    0.80    0.10
  -5  -6  -3    0.10    0.10
   5   6   3    0.00    0.10
  -5   6  -3    0.10    0.10
   5   6   3    0.00    0.10
  18   0  -4    1.40    0.10
  17   0  -4    0.80    0.10
 -17   0   4    0.70    0.10
  17   0  -4    0.80    0.10
 -16   0   4    2.20    0.20
  16   0  -4    2.40    0.20
  16   0  -4    2.30    0.20
 -16   0   4    2.00    0.20
  15   0  -4  426.56   12.00
 -15   0   4  421.96   12.00
 -15   0   4  389.06   12.00
 -15   0   4  403.36   12.00
  15   0  -4  415.26   12.00
 -15   0   4  396.76   11.90
  15   0  -4  389.26   11.90
 -14   0   4  179.08    5.50
 -14   0   4  186.08    5.50
 -14   0   4  185.58    5.50
  14   0  -4  190.98    5.50
 -14   0   4  178.18    5.50
  14   0  -4  189.68    5.50
  14   0  -4  187.58    5.50
 -14   0   4  178.18    5.50
  13   0  -4  172.78    5.20
  13   0  -4  175.48    5.20
 -13   0   4  169.48    5.20
  13   0  -4  180.18    5.10
 -13   0   4  171.58    5.20
 -13   0   4  172.58    5.20
 -13   0   4  167.18    5.10
  12   0  -4   25.50    0.80
 -12   0   4   23.30    0.80
  12   0  -4   24.40    0.80
 -12   0   4   23.80    0.80
 -12   0   4   23.60    0.80
  12   0  -4   24.90    1.10
 -12   0   4   23.50    0.80
 -12   0   4   24.50    0.80
 -11   0   4  238.98    7.20
  11   0  -4  254.87    7.20
 -11   0   4  241.48    7.20
 -11   0   4  242.08    7.20
  11   0  -4  253.77    7.40
  11   0  -4  249.08    7.20
 -11   0   4  241.18    7.20
 -11   0   4  235.08    7.20
 -11   0   4  238.48    7.20
  10   0  -4  415.76   12.20
  10   0  -4  426.36   12.20
  10   0  -4  403.86   12.00
 -10   0   4  390.06   12.00
  10   0  -4  406.06   12.00
   9   0  -4  622.64   19.00
   9   0  -4  653.33   19.20
   9   0  -4  668.33   19.20
   8   0  -4 1084.59   31.90
   7   0  -4  235.38    6.90
   7   0  -4  224.58    6.90
   6   0  -4   66.49    2.10
   6   0  -4   68.79    2.10
   5   0  -4   90.39    2.80
  -5   0   4   95.09    2.80
  -5   0   4   85.19    2.70
   5   0  -4   93.69    2.80
   4   0  -4  832.82   25.70
   4   0  -4  934.61   25.80
  -4   0   4  881.61   25.60
  -4   0   4  824.12   25.50
  -3   0   4 1830.92   58.89
   3   0  -4 2057.29   58.49
  -3   0   4 1943.61   58.49
   3   0  -4 2125.69   62.99
  -2   0   4  492.35   14.80
  -2   0   4  466.35   14.80
   2   0  -4  504.35   14.90
   2   0  -4  545.85   15.00
  -1   0   4 2536.45   74.29
   1   0  -4 2595.54   80.89
  -1   0   4 2442.56   77.79
   0   0   4 8103.39  273.57
   0   0   4 9748.92  276.47
   0   0  -4 9478.65  276.07
  -1   0  -4 9299.67  293.17
   1   0   4 9680.23  291.27
   1   0   4 9861.41  292.57
   2   0   4  767.42   21.70
  -2   0  -4  657.33   21.60
   2   0   4  784.82   21.60
   3   0   4   55.59    1.80
   3   0   4   57.89    1.80
   4   0   4  150.58    4.60
   5   0   4    2.60    0.30
   6   0   4  439.16   13.00
   7   0   4   21.60    0.70
   7   0   4   21.50    0.90
   8   0   4    0.90    0.20
  -8   0  -4    0.70    0.10
   8   0   4    0.60    0.10
  -8   0  -4    0.60    0.10
   9   0   4   19.60    0.70
   9   0   4   18.90    0.90
  -9   0  -4   19.00    0.70
  -9   0  -4   19.10    0.60
  10   0   4   26.90    0.90
 -10   0  -4   25.60    0.90
 -10   0  -4   26.70    0.90
  11   0   4   11.20    0.40
 -11   0  -4   10.90    0.40
 -12   0  -4  284.77    8.50
  12   0   4  293.27    8.50
  13   0   4 1089.79   31.80
 -13   0  -4 1083.79   31.80
  14   0   4   36.20    1.10
 -14   0  -4   35.00    1.10
  17  -1  -4    2.70    0.20
 -17  -1   4    2.10    0.20
  17  -1  -4    2.30    0.10
  17   1  -4    2.50    0.20
 -17   1   4    2.30    0.10
  17   1  -4    2.30    0.10
 -17   1   4    2.40    0.10
  16  -1  -4    2.00    0.20
 -16  -1   4    1.80    0.20
  16  -1  -4    1.80    0.20
  16  -1  -4    1.80    0.10
  16   1  -4    1.70    0.10
 -16   1   4    1.90    0.20
  16   1  -4    1.90    0.20
 -16   1   4    1.90    0.20
 -16   1   4    1.80    0.20
 -16   1   4    1.60    0.10
  15  -1  -4   27.40    0.90
  15  -1  -4   27.80    0.90
  15  -1  -4   27.30    0.90
 -15  -1   4   27.50    0.90
  15   1  -4   27.80    0.90
  15   1  -4   27.90    0.90
 -15   1   4   25.50    0.90
 -15   1   4   28.60    0.90
 -15   1   4   27.10    0.90
 -15   1   4   27.20    0.90
 -15   1   4   28.50    0.90
  14  -1  -4    7.70    0.30
  14  -1  -4    7.50    0.30
 -14  -1   4    7.60    0.40
 -14  -1   4    7.00    0.30
 -14   1   4    7.50    0.40
 -14   1   4    7.10    0.30
 -14   1   4    7.50    0.30
  14   1  -4    7.40    0.30
 -14   1   4    7.30    0.40
  14   1  -4    7.50    0.40
 -14   1   4    7.10    0.30
 -13  -1   4   57.79    1.80
  13  -1  -4   57.99    1.70
 -13  -1   4   50.49    1.70
  13  -1  -4   57.19    1.70
 -13   1   4   54.69    1.70
 -13   1   4   56.29    1.70
 -13   1   4   56.99    1.70
  13   1  -4   53.99    1.70
 -13   1   4   55.99    1.70
 -13   1   4   55.39    1.70
  13   1  -4   55.49    1.70
 -13   1   4   57.19    1.80
  13   1  -4   55.59    1.70
 -12  -1   4  141.19    4.30
 -12  -1   4  147.19    4.30
  12  -1  -4  148.19    4.30
  12  -1  -4  138.79    4.50
  12  -1  -4  149.29    4.30
 -12   1   4  143.19    4.30
 -12   1   4  147.19    4.30
  12   1  -4  144.99    4.50
 -12   1   4  141.99    4.30
  12   1  -4  142.69    4.30
 -12   1   4  142.69    4.30
 -12   1   4  140.99    4.30
  12   1  -4  144.29    4.30
 -12   1   4  141.99    4.30
  12   1  -4  144.69    4.30
 -11  -1   4    2.70    0.20
 -11  -1   4    2.60    0.20
  11  -1  -4    2.50    0.40
 -11  -1   4    3.60    0.20
 -11   1   4    3.10    0.20
 -11   1   4    3.00    0.20
 -11   1   4    2.90    0.20
 -11   1   4    3.50    0.20
  11   1  -4    3.10    0.20
 -11   1   4    3.10    0.20
  11   1  -4    2.90    0.20
  11   1  -4    3.20    0.20
 -11   1   4    3.20    0.20
  11   1  -4    2.90    0.40
 -10  -1   4   51.79    1.60
  10  -1  -4   55.99    1.80
  10  -1  -4   52.79    1.60
 -10  -1   4   50.59    1.60
 -10  -1   4   51.19    1.60
  10   1  -4   49.70    1.60
 -10   1   4   51.99    1.60
 -10   1   4   54.19    1.60
  10   1  -4   49.99    1.80
 -10   1   4   52.19    1.60
  10   1  -4   56.69    1.80
 -10   1   4   52.59    1.60
  10   1  -4   50.99    1.60
 -10   1   4   49.90    1.60
  10   1  -4   53.79    1.60
   9  -1  -4   38.00    1.30
   9  -1  -4   37.10    1.20
   9   1  -4   35.10    1.10
   9   1  -4   38.10    1.30
   9   1  -4   33.10    1.30
   8  -1  -4   50.09    1.60
   8  -1  -4   49.80    1.60
   8   1  -4   47.30    1.70
   8   1  -4   52.39    1.60
   7  -1  -4 1383.66   39.30
   7  -1  -4 1283.67   39.30
   7   1  -4 1392.66   39.30
   7   1  -4 1272.87   39.30
   6  -1  -4   48.80    1.50
   6  -1  -4   49.70    1.60
   6   1  -4   49.10    1.60
   6   1  -4   48.80    1.60
  -5  -1   4  274.47    8.00
   5  -1  -4  258.87    7.90
   5  -1  -4  275.67    8.00
  -5  -1   4  255.97    8.00
   5   1  -4  273.27    8.00
   5   1  -4  274.57    8.00
  -5   1   4  270.77    8.00
   4  -1  -4   21.20    0.60
  -4  -1   4   20.00    0.70
  -4  -1   4   21.70    0.70
  -4   1   4   20.40    0.70
   4   1  -4   17.50    0.70
   4   1  -4   21.40    0.70
  -3  -1   4 2265.37   64.29
  -3  -1   4 2191.88   64.49
   3   1  -4 1851.71   64.19
  -3   1   4 2256.17   64.39
   3   1  -4 2366.26   64.59
  -2  -1   4 1024.70   30.20
   2  -1  -4 1029.50   30.50
  -2  -1   4 1036.90   30.00
  -2   1   4 1018.30   30.00
   2   1  -4  937.81   29.90
   2   1  -4 1054.59   30.30
  -1  -1   4  188.58    5.70
   1  -1  -4  195.68    5.70
  -1  -1   4  201.48    5.70
   1   1  -4  179.88    5.70
   1   1  -4  200.68    5.80
  -1   1   4  192.18    5.70
   0  -1  -4  592.14   19.40
   0  -1   4  580.64   17.50
   0  -1   4  599.24   17.50
   0   1   4  613.44   17.50
   1  -1   4 6578.24  194.98
   1  -1   4 6459.65  198.78
  -1  -1  -4 5718.03  194.88
   1   1   4 6428.86  195.48
   1   1   4 6505.65  194.08
   2  -1   4   37.00    1.20
   2  -1   4   37.40    1.20
   2   1   4   37.20    1.20
   3  -1   4   27.80    1.00
   3  -1   4   31.20    1.00
   3   1   4   28.40    1.00
   4  -1   4  454.55   13.30
   4  -1   4  440.06   13.30
   4   1   4  454.75   13.30
   5  -1   4   31.50    1.10
   5   1   4   31.00    1.10
  -6  -1  -4    8.90    0.30
   6  -1   4    8.40    0.50
   6   1   4    8.80    0.50
   7  -1   4   26.90    1.00
   7  -1   4   26.30    0.90
  -7  -1  -4   25.00    0.90
   7   1   4   29.60    1.00
  -7   1  -4   27.70    0.90
  -7   1  -4   26.50    0.90
  -7   1  -4   25.20    0.80
   7   1   4   27.20    0.90
   8  -1   4    0.50    0.20
  -8  -1  -4    0.30    0.10
   8  -1   4    0.40    0.10
  -8   1  -4    0.30    0.10
   8   1   4    0.30    0.20
   8   1   4    0.50    0.10
  -8   1  -4    0.40    0.10
  -8   1  -4    0.50    0.10
   9  -1   4   28.40    1.10
   9  -1   4   29.20    0.90
  -9  -1  -4   28.40    1.00
   9   1   4   30.00    1.00
  -9   1  -4   29.10    0.90
   9   1   4   27.40    1.10
  -9   1  -4   30.40    0.90
  -9   1  -4   30.20    0.90
 -10  -1  -4   12.40    0.50
  10  -1   4   12.30    0.50
 -10   1  -4   11.80    0.40
 -10   1  -4   12.10    0.50
  10   1   4   12.90    0.50
 -11  -1  -4   19.90    0.70
  11  -1   4   19.40    0.70
  11   1   4   21.20    0.70
 -11   1  -4   18.70    0.70
 -11   1  -4   19.50    0.70
  12  -1   4  315.37    9.40
 -12  -1  -4  322.97    9.40
 -12   1  -4  323.07    9.40
  12   1   4  315.57    9.40
  13  -1   4   28.60    0.90
 -13  -1  -4   29.90    0.90
 -13   1  -4   29.80    0.90
  13   1   4   28.70    0.90
 -14  -1  -4   25.20    0.80
  14  -1   4   23.50    0.80
 -14   1  -4   23.80    0.80
  14   1   4   24.70    0.80
  17  -2  -4    1.90    0.10
 -17  -2   4    1.80    0.10
 -17   2   4    1.80    0.10
  17   2  -4    2.00    0.10
 -17   2   4    1.90    0.10
  16  -2  -4   13.70    0.50
 -16  -2   4   12.90    0.50
  16  -2  -4   12.50    0.40
  16   2  -4   12.40    0.40
 -16   2   4   12.40    0.40
  16   2  -4   12.50    0.50
 -16   2   4   12.60    0.50
 -16   2   4   13.20    0.50
 -16   2   4   12.20    0.40
  15  -2  -4    0.60    0.10
 -15  -2   4    0.50    0.10
  15  -2  -4    0.70    0.10
  15   2  -4    0.40    0.10
 -15   2   4    0.70    0.10
  15   2  -4    0.50    0.10
 -15   2   4    0.40    0.10
 -15   2   4    0.60    0.10
 -15   2   4    0.40    0.10
 -15   2   4    0.80    0.10
  14  -2  -4   19.40    0.70
  14  -2  -4   18.90    0.60
 -14  -2   4   19.20    0.70
 -14   2   4   19.20    0.70
  14   2  -4   19.90    0.70
 -14   2   4   19.20    0.70
 -14   2   4   19.10    0.70
  14   2  -4   18.50    0.60
 -14   2   4   18.60    0.70
 -14   2   4   18.80    0.70
  13  -2  -4   37.20    1.20
 -13  -2   4   36.90    1.20
  13   2  -4   36.90    1.20
 -13   2   4   36.80    1.20
  13   2  -4   37.30    1.20
 -13   2   4   37.60    1.20
 -13   2   4   36.90    1.20
 -13   2   4   36.60    1.20
 -13   2   4   37.60    1.20
  13   2  -4   36.60    1.20
 -12  -2   4    3.40    0.20
 -12  -2   4    3.50    0.20
 -12   2   4    3.60    0.20
 -12   2   4    3.30    0.30
  12   2  -4    3.20    0.20
  12   2  -4    3.30    0.20
  12   2  -4    3.80    0.20
 -12   2   4    3.60    0.20
 -12   2   4    3.50    0.20
 -12   2   4    3.70    0.20
 -11  -2   4    4.40    0.30
  11  -2  -4    3.70    0.40
 -11  -2   4    4.50    0.30
  11  -2  -4    4.30    0.20
  11   2  -4    4.60    0.30
 -11   2   4    4.60    0.20
 -11   2   4    4.70    0.30
 -11   2   4    4.50    0.20
  11   2  -4    4.80    0.30
 -11   2   4    5.10    0.30
 -11   2   4    4.50    0.20
  10  -2  -4  118.09    3.60
 -10  -2   4  123.19    3.60
 -10  -2   4  115.59    3.60
  10  -2  -4  120.59    3.80
 -10   2   4  119.09    3.60
 -10   2   4  126.29    3.60
 -10   2   4  128.09    3.70
  10   2  -4  118.39    3.60
 -10   2   4  121.39    3.60
  10   2  -4  119.99    3.60
 -10   2   4  126.89    3.60
  -9  -2   4    0.10    0.10
   9  -2  -4    0.00    0.10
  -9  -2   4   -0.10    0.10
   9   2  -4   -0.10    0.10
   9   2  -4    0.10    0.10
  -9   2   4    0.20    0.10
  -9   2   4    0.00    0.10
  -9   2   4    0.20    0.10
  -9   2   4    0.10    0.10
  -9   2   4    0.20    0.10
   9   2  -4    0.00    0.10
   9   2  -4    0.20    0.10
   8  -2  -4    0.20    0.10
   8  -2  -4    0.20    0.10
  -8   2   4    0.20    0.10
   8   2  -4    0.20    0.10
   8   2  -4    0.20    0.10
   7  -2  -4    3.00    0.30
   7  -2  -4    2.90    0.20
   7   2  -4    2.70    0.20
   6  -2  -4  110.19    3.30
   6  -2  -4  110.99    3.30
   6   2  -4  108.59    3.30
   6   2  -4  107.09    3.40
   5  -2  -4   84.49    2.60
   5  -2  -4   86.39    2.60
   5  -2  -4   83.19    2.50
   5   2  -4   84.29    2.70
   5   2  -4   86.29    2.60
   4  -2  -4  400.76   11.60
   4  -2  -4  396.06   11.50
  -4  -2   4  383.96   11.70
   4  -2  -4  392.36   11.60
   4   2  -4  407.46   11.70
   4   2  -4  378.66   11.60
  -3  -2   4   19.20    0.70
   3  -2  -4   20.10    0.60
   3  -2  -4   21.70    0.60
  -3  -2   4   19.80    0.70
   3  -2  -4   19.90    0.70
   3   2  -4   19.00    0.60
  -3   2   4   20.20    0.70
   3   2  -4   19.70    0.70
  -2  -2   4  196.38    6.00
   2  -2  -4  202.98    6.00
   2  -2  -4  205.28    6.00
  -2  -2   4  201.08    6.10
   2   2  -4  209.78    6.10
  -2   2   4  200.28    6.00
  -1  -2   4  258.37    7.70
  -1  -2   4  268.17    7.80
   1  -2  -4  266.17    7.70
   1  -2  -4  261.87    7.70
  -1   2   4  252.47    7.70
   0  -2   4   95.89    2.90
   0  -2   4   90.59    2.80
   0   2   4   93.49    2.80
   1  -2   4  400.66   11.80
   1  -2   4  417.96   11.90
   1   2   4  388.06   11.80
   2  -2   4  359.06   10.70
   2  -2   4  369.16   10.80
   2   2   4  356.56   10.70
   3  -2   4    3.20    0.30
   3  -2   4    3.40    0.30
   3   2   4    3.40    0.20
  -4  -2  -4   16.80    0.50
   4  -2   4   17.10    0.70
   4  -2   4   17.30    0.60
   4   2   4   14.60    0.60
   5  -2   4   89.09    2.80
  -5  -2  -4   88.69    2.60
   5  -2   4   87.29    2.60
   5   2   4   85.69    2.60
   5   2   4   88.99    2.70
   6  -2   4    0.70    0.20
  -6  -2  -4    0.50    0.10
   6  -2   4    0.60    0.10
  -6  -2  -4    0.50    0.10
   6   2   4    0.70    0.10
   6   2   4    0.60    0.20
  -6   2  -4    0.50    0.10
  -6   2  -4    0.40    0.10
  -7  -2  -4  164.48    4.90
   7  -2   4  166.48    4.90
   7  -2   4  158.38    5.00
  -7  -2  -4  160.78    4.90
   7   2   4  171.38    4.90
  -7   2  -4  166.88    4.90
   7   2   4  157.38    4.90
  -7   2  -4  166.78    4.90
  -7   2  -4  166.08    4.90
  -8  -2  -4   27.10    0.90
   8  -2   4   27.60    0.90
  -8   2  -4   28.40    0.90
   8   2   4   29.40    0.90
  -8   2  -4   27.80    0.90
   8   2   4   27.20    0.90
   9  -2   4    5.90    0.30
  -9  -2  -4    5.80    0.30
   9   2   4    5.70    0.30
   9   2   4    6.20    0.30
  -9   2  -4    5.60    0.30
  -9   2  -4    5.90    0.30
  -9   2  -4    5.80    0.30
  10  -2   4    0.90    0.10
 -10  -2  -4    0.60    0.10
 -10   2  -4    0.70    0.10
  10   2   4    0.70    0.10
 -10   2  -4    0.70    0.10
  10   2   4    0.70    0.10
 -10   2  -4    0.80    0.10
 -11  -2  -4   15.80    0.60
  11  -2   4   14.90    0.50
 -11   2  -4   15.50    0.50
  11   2   4   16.10    0.60
 -11   2  -4   15.70    0.60
  12  -2   4    2.10    0.20
 -12  -2  -4    2.40    0.20
 -12   2  -4    1.90    0.20
 -12   2  -4    2.10    0.20
  12   2   4    1.90    0.20
  13  -2   4    3.90    0.20
 -13  -2  -4    4.30    0.20
 -13   2  -4    4.40    0.20
 -13   2  -4    4.30    0.20
  13   2   4    4.40    0.20
 -14  -2  -4    4.30    0.20
 -14   2  -4    4.40    0.20
  16  -3  -4    4.60    0.20
 -16   3   4    4.60    0.20
 -16   3   4    4.50    0.20
  16   3  -4    4.70    0.20
 -16   3   4    4.60    0.20
  15  -3  -4   22.60    0.80
  15  -3  -4   24.00    0.70
 -15  -3   4   23.60    0.80
 -15   3   4   23.70    0.80
 -15   3   4   23.50    0.80
 -15   3   4   22.90    0.80
  15   3  -4   24.40    0.80
 -15   3   4   24.10    0.80
 -15   3   4   24.10    0.80
  14  -3  -4    2.50    0.20
  14  -3  -4    2.50    0.20
 -14  -3   4    2.60    0.20
  14   3  -4    2.60    0.20
 -14   3   4    2.50    0.20
  14   3  -4    2.60    0.20
 -14   3   4    2.50    0.20
 -14   3   4    2.60    0.20
 -14   3   4    2.70    0.20
 -14   3   4    2.70    0.20
 -13  -3   4  116.39    3.60
 -13   3   4  118.89    3.60
 -13   3   4  120.09    3.60
 -13   3   4  119.79    3.60
  13   3  -4  121.89    3.60
  13   3  -4  113.89    3.50
 -13   3   4  118.69    3.60
 -13   3   4  118.99    3.60
  12  -3  -4  228.08    6.70
 -12  -3   4  226.58    6.80
 -12   3   4  227.68    6.80
 -12   3   4  234.48    6.80
  12   3  -4  232.28    6.80
 -12   3   4  230.48    6.80
 -12   3   4  226.28    6.80
  12   3  -4  217.58    6.80
 -12   3   4  230.88    6.80
 -11  -3   4   85.19    2.70
  11  -3  -4   88.49    2.60
 -11   3   4   91.09    2.70
  11   3  -4   86.09    2.70
 -11   3   4   90.39    2.70
 -11   3   4   88.69    2.70
 -11   3   4   88.29    2.70
  11   3  -4   91.39    2.70
 -11   3   4   88.89    2.70
  11   3  -4   84.09    2.70
  10  -3  -4  443.86   13.40
 -10   3   4  459.55   13.40
  10   3  -4  428.86   13.40
 -10   3   4  461.75   13.40
  10   3  -4  455.35   13.40
 -10   3   4  469.25   13.40
  10   3  -4  448.06   13.40
 -10   3   4  478.35   13.40
   9   3  -4    1.90    0.20
  -9   3   4    2.00    0.20
  -9   3   4    1.90    0.20
   9   3  -4    1.90    0.20
  -9   3   4    2.10    0.20
  -9   3   4    2.60    0.20
  -9   3   4    1.70    0.20
   9   3  -4    1.90    0.20
  -8   3   4   13.40    0.50
  -8   3   4   13.30    0.50
   8   3  -4   12.90    0.50
  -8   3   4   13.10    0.50
  -8   3   4   12.90    0.50
  -8   3   4   13.40    0.50
   8   3  -4   12.60    0.50
   8   3  -4   12.30    0.50
  -7  -3   4    0.70    0.10
   7   3  -4    0.90    0.10
  -7   3   4    1.00    0.10
   7   3  -4    0.80    0.10
  -7   3   4    0.60    0.10
  -7   3   4    0.70    0.10
   7   3  -4    0.60    0.10
  -7   3   4    0.80    0.10
   6  -3  -4   24.60    0.80
   6   3  -4   23.50    0.80
  -6   3   4   23.80    0.80
  -6   3   4   24.50    0.80
  -6   3   4   24.20    0.80
   5  -3  -4   62.09    1.90
  -5   3   4   62.09    1.90
   4  -3  -4    9.60    0.40
  -4   3   4    9.50    0.40
   3  -3  -4  203.98    6.10
  -2  -3   4  195.48    6.00
   2  -3  -4  197.58    5.90
   1  -3  -4   82.19    2.50
  -1  -3   4   77.69    2.60
  -1  -3   4   80.09    2.40
   0  -3   4    0.30    0.10
   0  -3  -4    0.20    0.10
   0  -3   4    0.10    0.10
  -1  -3  -4  243.28    7.50
   1  -3   4  259.27    7.50
  -1  -3  -4  270.07    7.60
   1  -3   4  248.88    7.70
   1   3   4  251.87    7.50
  -2  -3  -4    0.60    0.10
  -2  -3  -4    0.60    0.10
   2   3   4    0.50    0.10
  -3  -3  -4  202.38    5.70
   3  -3   4  182.98    5.90
   3  -3   4  204.48    5.70
   3  -3   4  191.38    5.70
  -3  -3  -4  193.78    5.90
   3   3   4  198.48    5.80
  -3   3  -4  192.58    5.70
  -3   3  -4  196.08    5.70
   3   3   4  201.18    5.70
  -3   3  -4  181.58    5.70
   3   3   4  184.58    5.70
  -4  -3  -4    2.80    0.10
   4  -3   4    2.80    0.20
  -4   3  -4    3.20    0.20
   4   3   4    2.90    0.20
  -4   3  -4    2.80    0.20
  -4   3  -4    2.70    0.20
   4   3   4    2.80    0.20
   4   3   4    2.90    0.20
   5  -3   4  220.88    6.50
   5  -3   4  212.18    6.40
  -5  -3  -4  226.28    6.50
   5   3   4  212.28    6.40
  -5   3  -4  213.28    6.50
   5   3   4  208.38    6.50
   5   3   4  220.88    6.50
  -5   3  -4  224.18    6.50
  -5   3  -4  217.08    6.50
   5   3   4  229.58    6.50
  -6  -3  -4    0.50    0.10
   6  -3   4    0.20    0.10
  -6  -3  -4    0.20    0.10
   6  -3   4    0.20    0.10
  -6   3  -4    0.50    0.10
  -6   3  -4    0.30    0.10
  -6   3  -4    0.40    0.10
   6   3   4    0.40    0.10
  -6   3  -4    0.20    0.10
   6   3   4    0.20    0.10
   7  -3   4    6.10    0.30
  -7  -3  -4    6.20    0.30
  -7   3  -4    6.40    0.30
  -7   3  -4    6.40    0.30
  -7   3  -4    7.30    0.30
   7   3   4    7.20    0.30
  -7   3  -4    6.90    0.30
   7   3   4    6.90    0.30
   8  -3   4   43.60    1.40
  -8  -3  -4   46.20    1.40
  -8   3  -4   46.50    1.40
   8   3   4   46.30    1.40
   8   3   4   43.30    1.40
  -8   3  -4   47.20    1.40
  -8   3  -4   47.60    1.40
  -9  -3  -4    1.70    0.20
   9   3   4    2.00    0.20
   9   3   4    1.90    0.20
  -9   3  -4    1.80    0.20
  -9   3  -4    1.60    0.20
  -9   3  -4    1.30    0.10
 -10  -3  -4    0.90    0.10
  10  -3   4    1.00    0.10
  10   3   4    1.10    0.10
 -10   3  -4    0.90    0.10
 -10   3  -4    1.00    0.10
 -10   3  -4    0.90    0.10
  10   3   4    1.20    0.10
  11  -3   4   37.00    1.20
 -11  -3  -4   40.10    1.30
  11   3   4   39.80    1.20
 -11   3  -4   41.80    1.20
 -11   3  -4   40.20    1.20
 -12  -3  -4   28.20    0.90
 -12   3  -4   27.60    0.90
  12   3   4   28.00    0.90
 -12   3  -4   26.90    0.90
 -13   3  -4   22.70    0.70
 -13   3  -4   21.30    0.70
  14  -4  -4    7.80    0.30
 -14   4   4    7.50    0.30
 -14   4   4    7.90    0.30
  14   4  -4    8.90    0.30
 -14   4   4    7.90    0.30
 -14   4   4    8.40    0.30
 -13   4   4    4.00    0.20
 -13   4   4    3.90    0.20
 -13   4   4    3.90    0.20
  13   4  -4    3.70    0.20
 -13   4   4    3.80    0.20
  12  -4  -4   28.40    0.90
 -12   4   4   26.90    0.90
  12   4  -4   28.20    0.90
 -12   4   4   27.70    0.90
 -12   4   4   26.90    0.90
 -12   4   4   27.60    0.90
  11  -4  -4   46.00    1.40
 -11   4   4   47.70    1.50
 -11   4   4   46.60    1.50
  11   4  -4   48.60    1.50
 -11   4   4   46.90    1.50
 -11   4   4   48.20    1.50
  10  -4  -4   35.50    1.10
 -10   4   4   34.30    1.10
 -10   4   4   36.10    1.10
 -10   4   4   35.60    1.10
 -10   4   4   35.50    1.10
  10   4  -4   33.40    1.10
  10   4  -4   34.50    1.10
   9  -4  -4   63.19    1.90
  -9   4   4   62.99    2.00
   9   4  -4   62.89    2.00
   9   4  -4   62.49    2.00
  -9   4   4   67.19    2.00
  -9   4   4   64.79    2.00
  -9   4   4   66.49    2.00
   8  -4  -4    8.90    0.30
  -8  -4   4    9.00    0.40
  -8   4   4    9.30    0.40
   8   4  -4    9.10    0.40
   8   4  -4    8.50    0.40
  -8   4   4    8.80    0.40
  -8   4   4    9.40    0.40
  -7  -4   4   15.50    0.60
   7   4  -4   15.20    0.60
  -7   4   4   15.50    0.50
  -7   4   4   16.10    0.60
   7   4  -4   15.60    0.60
  -7   4   4   15.60    0.60
  -6  -4   4   17.00    0.60
  -6   4   4   17.00    0.60
   6   4  -4   17.40    0.60
  -6   4   4   17.10    0.60
  -6   4   4   17.80    0.60
   6   4  -4   17.40    0.60
   6   4  -4   17.50    0.60
  -6   4   4   17.30    0.60
  -5  -4   4    0.10    0.10
  -5   4   4    0.10    0.10
   5   4  -4    0.10    0.10
   5   4  -4    0.10    0.10
  -5   4   4    0.10    0.10
   5   4  -4    0.20    0.10
   5   4  -4    0.10    0.10
  -5   4   4    0.10    0.10
  -5   4   4    0.20    0.10
  -4  -4   4    9.50    0.40
  -4   4   4    9.20    0.40
   4   4  -4    8.70    0.40
  -4   4   4    9.30    0.40
  -4   4   4    9.10    0.30
  -4   4   4    9.70    0.40
   4   4  -4    8.60    0.30
   4   4  -4    9.20    0.40
   4   4  -4    9.40    0.40
  -4   4   4    9.40    0.40
  -3  -4   4   27.80    0.90
  -3  -4   4   28.60    0.90
   3   4  -4   28.70    0.90
  -3   4   4   29.00    0.90
   3   4  -4   27.30    0.90
  -3   4   4   27.30    0.90
   3   4  -4   26.00    0.90
  -3   4   4   27.80    0.90
  -3   4   4   29.90    0.90
   3   4  -4   27.30    0.90
  -3   4   4   27.90    0.90
  -2  -4   4   16.80    0.60
  -2  -4   4   16.20    0.50
  -2   4   4   16.60    0.60
   2   4  -4   16.60    0.60
   2   4  -4   15.30    0.50
  -2   4   4   16.00    0.60
  -2   4   4   16.30    0.60
   2   4  -4   16.10    0.60
   2   4  -4   15.80    0.60
  -2   4   4   16.90    0.60
  -1  -4   4  197.18    5.80
  -1  -4   4  197.18    5.90
   1  -4  -4  199.58    5.80
  -1  -4   4  196.28    5.80
  -1   4   4  202.58    5.90
   1   4  -4  193.58    5.80
  -1   4   4  196.58    5.90
  -1   4   4  195.58    5.90
  -1   4   4  200.18    5.80
   1   4  -4  201.68    5.90
   1   4  -4  191.08    5.80
   0  -4   4  692.33   20.30
   0  -4  -4  693.93   20.20
   0  -4   4  692.93   20.20
   0   4   4  677.03   20.20
   0   4   4  710.13   20.20
   0   4  -4  682.93   20.20
   0   4  -4  693.63   20.20
   0   4  -4  668.23   20.20
   0   4   4  672.83   20.20
   0   4   4  706.33   20.20
   1  -4   4  245.48    7.20
   1  -4   4  234.38    7.20
  -1  -4  -4  252.37    7.20
   1  -4   4  249.08    7.20
   1   4   4  234.58    7.20
   1   4   4  239.38    7.20
  -1   4  -4  249.48    7.20
  -1   4  -4  227.08    7.20
   1   4   4  238.18    7.20
   1   4   4  254.47    7.20
  -1   4  -4  246.88    7.20
   2  -4   4   45.80    1.50
  -2  -4  -4   48.10    1.40
   2  -4   4   47.00    1.40
   2  -4   4   45.90    1.40
  -2   4  -4   46.50    1.40
   2   4   4   47.30    1.50
   2   4   4   46.30    1.50
   2   4   4   45.10    1.40
  -2   4  -4   46.90    1.40
   2   4   4   46.50    1.50
  -2   4  -4   47.80    1.50
   3  -4   4   11.50    0.40
  -3  -4  -4   11.90    0.40
   3  -4   4   11.40    0.40
  -3   4  -4   11.60    0.40
   3   4   4   11.00    0.40
   3   4   4   11.70    0.50
   3   4   4   11.40    0.40
  -3   4  -4   11.60    0.50
   3   4   4   11.10    0.40
   4  -4   4   11.30    0.40
   4  -4   4   10.90    0.40
  -4  -4  -4   11.70    0.40
   4   4   4   11.60    0.50
   4   4   4   11.40    0.40
  -4   4  -4   11.10    0.40
   4   4   4   11.10    0.40
   4   4   4   11.80    0.50
  -4   4  -4   11.50    0.50
   5  -4   4    7.00    0.30
  -5  -4  -4    7.30    0.30
   5  -4   4    7.50    0.30
  -5   4  -4    7.20    0.30
  -5   4  -4    6.70    0.30
   5   4   4    7.60    0.40
   5   4   4    7.20    0.30
   5   4   4    7.50    0.30
   5   4   4    7.90    0.30
   6  -4   4   50.19    1.50
   6  -4   4   48.00    1.50
  -6  -4  -4   51.99    1.50
   6   4   4   51.79    1.60
   6   4   4   51.89    1.60
   6   4   4   50.59    1.60
  -6   4  -4   50.49    1.60
  -6   4  -4   48.30    1.60
  -6   4  -4   51.29    1.60
   7  -4   4   32.30    1.00
  -7  -4  -4   30.60    1.00
  -7   4  -4   33.80    1.10
  -7   4  -4   31.80    1.00
   7   4   4   32.30    1.10
   7   4   4   34.60    1.10
   7   4   4   33.40    1.10
  -7   4  -4   33.20    1.10
  -8   4  -4   23.20    0.80
   8   4   4   23.90    0.80
   8   4   4   23.60    0.80
  -8   4  -4   23.50    0.80
  -8   4  -4   25.40    0.80
  -9   4  -4    4.20    0.30
   9   4   4    4.50    0.20
   9   4   4    4.40    0.20
  -9   4  -4    4.30    0.20
  -9   4  -4    4.00    0.20
 -10   4  -4   16.10    0.50
  10   4   4   16.10    0.50
  10   4   4   15.90    0.50
 -10   4  -4   15.80    0.50
 -11   4  -4   22.20    0.70
 -11   4  -4   21.70    0.70
  11   4   4   21.30    0.70
  11  -5  -4    3.80    0.20
 -11   5   4    3.80    0.20
 -11   5   4    3.70    0.20
  11   5  -4    3.70    0.20
 -11   5   4    3.70    0.20
  10  -5  -4   22.70    0.70
 -10   5   4   22.90    0.70
 -10   5   4   21.60    0.70
  10   5  -4   22.60    0.70
 -10   5   4   22.40    0.70
   9  -5  -4   38.70    1.20
  -9   5   4   38.80    1.20
  -9   5   4   37.50    1.20
  -9   5   4   37.20    1.20
   9   5  -4   38.50    1.20
  -8  -5   4   23.50    0.80
   8  -5  -4   25.00    0.80
  -8   5   4   25.50    0.80
  -8   5   4   25.10    0.80
   8   5  -4   24.40    0.80
  -8   5   4   24.60    0.80
   8   5  -4   23.40    0.80
   7  -5  -4  129.09    4.00
  -7  -5   4  135.99    4.00
  -7   5   4  135.39    4.00
  -7   5   4  134.39    4.00
   7   5  -4  133.49    4.00
   7   5  -4  129.99    4.00
  -7   5   4  135.69    4.00
   6  -5  -4   20.70    0.70
  -6  -5   4   22.70    0.80
  -6   5   4   21.60    0.70
  -6   5   4   22.20    0.70
  -6   5   4   21.50    0.70
   6   5  -4   21.50    0.70
   6   5  -4   20.90    0.70
  -6   5   4   21.30    0.70
  -5  -5   4   12.10    0.40
  -5  -5   4   13.00    0.50
   5  -5  -4   12.80    0.40
  -5   5   4   12.70    0.50
  -5   5   4   11.90    0.40
  -5   5   4   12.40    0.50
   5   5  -4   12.50    0.50
   5   5  -4   11.90    0.40
   5   5  -4   12.40    0.50
  -5   5   4   12.80    0.50
   4  -5  -4    0.60    0.10
  -4  -5   4    0.60    0.10
  -4  -5   4    0.60    0.10
   4   5  -4    0.50    0.10
  -4   5   4    0.50    0.10
   4   5  -4    0.50    0.10
   4   5  -4    0.50    0.10
  -4   5   4    0.70    0.10
  -4   5   4    0.50    0.10
  -4   5   4    0.70    0.10
  -4   5   4    0.70    0.10
   3  -5  -4   17.90    0.60
  -3  -5   4   17.90    0.60
  -3  -5   4   18.10    0.70
   3   5  -4   18.10    0.70
   3   5  -4   17.30    0.60
  -3   5   4   18.00    0.60
  -3   5   4   17.60    0.60
   3   5  -4   18.00    0.60
  -3   5   4   18.60    0.60
  -3   5   4   18.60    0.60
   2  -5  -4   80.29    2.40
  -2  -5   4   81.89    2.50
  -2  -5   4   82.89    2.50
   2   5  -4   82.99    2.50
  -2   5   4   80.79    2.50
  -2   5   4   81.09    2.50
  -2   5   4   82.19    2.50
   2   5  -4   80.29    2.50
   2   5  -4   78.19    2.50
  -2   5   4   83.69    2.50
  -1  -5   4    0.70    0.10
  -1  -5   4    0.80    0.10
   1  -5  -4    0.80    0.10
  -1  -5   4    0.70    0.10
  -1   5   4    0.70    0.10
   1   5  -4    0.60    0.10
  -1   5   4    0.70    0.10
   1   5  -4    0.70    0.10
  -1   5   4    0.70    0.10
   1   5  -4    0.70    0.10
  -1   5   4    0.60    0.10
   0  -5   4   21.00    0.70
   0  -5   4   19.10    0.70
   0  -5   4   20.20    0.70
   0  -5  -4   21.70    0.70
   0   5  -4   21.40    0.70
   0   5  -4   20.20    0.70
   0   5   4   20.30    0.70
   0   5   4   21.00    0.70
   0   5   4   21.10    0.70
   0   5   4   20.80    0.70
   0   5  -4   21.60    0.70
  -1  -5  -4   22.50    0.70
   1  -5   4   22.90    0.70
   1  -5   4   20.80    0.70
   1  -5   4   21.80    0.80
  -1   5  -4   22.40    0.70
   1   5   4   22.30    0.70
  -1   5  -4   21.50    0.70
   1   5   4   22.50    0.80
  -1   5  -4   22.10    0.80
   1   5   4   22.50    0.80
   1   5   4   23.20    0.80
   2  -5   4   75.09    2.20
   2  -5   4   68.19    2.20
  -2  -5  -4   72.89    2.20
   2  -5   4   69.69    2.20
   2   5   4   75.69    2.20
   2   5   4   72.39    2.20
   2   5   4   73.39    2.20
  -2   5  -4   70.59    2.20
  -2   5  -4   76.29    2.30
   2   5   4   75.49    2.30
   3  -5   4   12.10    0.40
  -3  -5  -4   12.10    0.40
   3  -5   4   10.90    0.40
  -3   5  -4   12.30    0.50
   3   5   4   11.90    0.50
   3   5   4   12.10    0.50
   3   5   4   12.00    0.50
   3   5   4   12.00    0.40
  -4  -5  -4    0.10    0.10
   4  -5   4    0.10    0.10
   4  -5   4    0.10    0.10
   4   5   4    0.10    0.10
  -4   5  -4    0.10    0.10
   4   5   4    0.00    0.10
   4   5   4    0.10    0.10
   4   5   4    0.00    0.10
   5  -5   4    0.10    0.10
  -5  -5  -4    0.10    0.10
  -5   5  -4    0.20    0.10
   5   5   4    0.20    0.10
   5   5   4    0.30    0.10
   5   5   4    0.10    0.10
   5   5   4    0.20    0.10
   6  -5   4   16.50    0.60
  -6  -5  -4   15.70    0.50
  -6   5  -4   16.60    0.60
   6   5   4   17.40    0.60
   6   5   4   18.10    0.60
   6   5   4   17.40    0.60
  -6   5  -4   16.90    0.60
  -7  -5  -4    0.70    0.10
  -7   5  -4    0.60    0.10
   7   5   4    0.60    0.10
   7   5   4    0.60    0.10
  -7   5  -4    0.60    0.10
   7   5   4    0.60    0.10
  -8   5  -4   14.00    0.50
  -8   5  -4   13.70    0.50
   8   5   4   14.40    0.50
   8   5   4   14.40    0.50
  -7  -6   4    0.20    0.10
   7   6  -4    0.30    0.10
  -7   6   4    0.20    0.10
  -7   6   4    0.40    0.10
  -6  -6   4   11.20    0.40
   6  -6  -4   11.10    0.40
  -6   6   4   10.60    0.40
  -6   6   4   11.50    0.40
   6   6  -4   10.50    0.40
   5  -6  -4   49.40    1.50
   5  -6  -4   50.09    1.50
  -5   6   4   48.00    1.50
   5   6  -4   46.40    1.50
   5   6  -4   47.00    1.50
  -5   6   4   50.09    1.50
  -5   6   4   48.80    1.50
   4  -6  -4    3.60    0.20
  -4  -6   4    3.30    0.20
   4  -6  -4    3.70    0.20
  -4  -6   4    3.60    0.20
  -4   6   4    3.50    0.20
   4   6  -4    3.50    0.20
  -4   6   4    3.60    0.20
  -4   6   4    3.40    0.20
   4   6  -4    3.30    0.20
  -3  -6   4    0.30    0.10
  -3  -6   4    0.30    0.10
   3  -6  -4    0.20    0.10
   3   6  -4    0.10    0.10
  -3   6   4    0.20    0.10
  -3   6   4    0.10    0.10
  -3   6   4    0.20    0.10
   3   6  -4    0.10    0.10
  -2  -6   4   41.10    1.20
   2  -6  -4   40.80    1.20
  -2  -6   4   41.20    1.30
   2  -6  -4   39.20    1.20
   2   6  -4   38.70    1.20
  -2   6   4   39.80    1.20
   2   6  -4   38.40    1.20
  -2   6   4   37.10    1.20
  -2   6   4   41.70    1.20
  -2   6   4   39.80    1.20
   1  -6  -4  135.39    3.90
  -1  -6   4  128.89    3.90
  -1  -6   4  137.49    3.90
   1  -6  -4  129.19    3.90
   1   6  -4  126.89    3.90
  -1   6   4  125.19    3.90
  -1   6   4  137.19    3.90
  -1   6   4  134.99    3.90
  -1   6   4  131.39    3.90
   1   6  -4  127.39    3.90
   0  -6   4   52.69    1.70
   0  -6  -4   56.29    1.70
   0  -6  -4   56.39    1.70
   0  -6   4   58.19    1.70
   0   6   4   56.39    1.70
   0   6   4   55.29    1.70
   0   6   4   56.89    1.70
   0   6  -4   56.59    1.70
   0   6   4   57.49    1.70
  -1  -6  -4   20.80    0.70
  -1  -6  -4   20.50    0.70
   1  -6   4   18.90    0.70
   1  -6   4   21.30    0.70
   1   6   4   20.90    0.70
   1   6   4   20.60    0.70
  -1   6  -4   21.10    0.70
   1   6   4   20.40    0.70
   1   6   4   20.90    0.70
  -2  -6  -4  178.08    5.20
  -2  -6  -4  167.78    5.20
   2   6   4  171.88    5.20
   2   6   4  178.98    5.20
   2   6   4  179.28    5.20
  -2   6  -4  173.08    5.20
   2   6   4  180.08    5.20
  -3  -6  -4   12.30    0.50
   3  -6   4   12.30    0.40
   3   6   4   12.30    0.40
   3   6   4   12.60    0.40
   3   6   4   12.70    0.40
  -3   6  -4   11.70    0.40
   4  -6   4   26.90    0.80
  -4  -6  -4   25.70    0.90
   4   6   4   27.00    0.80
   4   6   4   27.40    0.80
  -4   6  -4   26.10    0.80
  18   0  -5    0.00    0.10
 -17   0   5   -0.10    0.10
  17   0  -5    0.00    0.10
  17   0  -5    0.10    0.10
  16   0  -5    0.10    0.10
 -16   0   5    0.00    0.10
 -16   0   5    0.00    0.10
 -16   0   5    0.10    0.10
  16   0  -5    0.10    0.10
  16   0  -5    0.10    0.10
 -15   0   5   -0.10    0.10
 -15   0   5    0.00    0.10
  15   0  -5    0.00    0.10
 -15   0   5    0.00    0.10
  15   0  -5    0.10    0.10
  15   0  -5    0.20    0.10
 -15   0   5    0.10    0.10
 -15   0   5    0.10    0.10
 -14   0   5    0.00    0.10
 -14   0   5    0.20    0.10
 -14   0   5    0.00    0.10
 -14   0   5   -0.10    0.10
 -14   0   5    0.00    0.10
  14   0  -5    0.70    0.10
  14   0  -5    0.20    0.10
  14   0  -5    0.00    0.10
 -13   0   5    0.00    0.10
  13   0  -5    0.00    0.10
 -13   0   5    0.00    0.10
  13   0  -5    0.10    0.10
 -13   0   5    0.00    0.10
  13   0  -5    0.00    0.10
 -13   0   5    0.10    0.10
 -13   0   5    0.10    0.10
 -12   0   5    0.10    0.10
  12   0  -5    0.00    0.10
  12   0  -5   -0.20    0.20
 -12   0   5    0.00    0.10
 -12   0   5    0.00    0.10
 -12   0   5    0.00    0.10
  12   0  -5    0.00    0.10
 -12   0   5    0.00    0.10
 -11   0   5    0.00    0.10
 -11   0   5    0.10    0.10
 -11   0   5    0.10    0.10
  11   0  -5   -0.10    0.20
  11   0  -5   -0.10    0.10
 -11   0   5    0.00    0.10
 -11   0   5    0.00    0.10
  11   0  -5    0.00    0.10
 -11   0   5    0.20    0.10
  10   0  -5    0.00    0.10
  10   0  -5    0.00    0.20
 -10   0   5    0.10    0.10
  10   0  -5    0.10    0.10
  10   0  -5    0.10    0.10
   9   0  -5    0.10    0.10
   9   0  -5    0.00    0.10
   9   0  -5    0.00    0.10
   8   0  -5    0.00    0.10
   8   0  -5    0.00    0.10
   7   0  -5    0.00    0.10
   7   0  -5    0.10    0.10
  -6   0   5    0.00    0.10
   6   0  -5    0.00    0.10
   6   0  -5    0.00    0.10
  -5   0   5    0.00    0.10
   5   0  -5    0.00    0.10
   3   0  -5   -0.10    0.10
  -3   0   5    0.10    0.10
   3   0  -5   -0.10    0.10
  -2   0   5   -0.50    0.10
  -1   0   5    0.00    0.10
   1   0  -5    0.10    0.10
  -1   0   5    0.20    0.10
   0   0  -5    0.70    0.10
   1   0   5   -0.10    0.10
   1   0   5   -0.20    0.10
   2   0   5   -0.10    0.10
   2   0   5    0.00    0.10
   3   0   5   -0.60    0.10
   4   0   5    0.00    0.10
   5   0   5   -0.10    0.10
   6   0   5    0.00    0.20
   7   0   5    0.00    0.20
  -7   0  -5    0.00    0.10
  -7   0  -5    0.00    0.10
  -8   0  -5    0.10    0.10
   8   0   5    0.10    0.10
   8   0   5    0.10    0.20
  -8   0  -5    0.00    0.10
  -9   0  -5    0.00    0.10
  -9   0  -5    0.00    0.10
   9   0   5    0.00    0.10
  10   0   5    0.00    0.10
 -10   0  -5    0.10    0.10
 -11   0  -5   -0.10    0.10
  11   0   5    0.10    0.10
 -12   0  -5    0.00    0.10
  12   0   5    0.10    0.10
  13   0   5    0.10    0.10
 -13   0  -5    0.30    0.10
  18  -1  -5   34.10    1.10
 -18  -1   5   37.50    1.20
  18   1  -5   37.10    1.20
  17  -1  -5    3.40    0.20
 -17  -1   5    3.40    0.20
  17  -1  -5    3.40    0.20
  17  -1  -5    3.50    0.20
  17   1  -5    3.70    0.20
 -17   1   5    3.10    0.20
 -17   1   5    3.20    0.20
 -17   1   5    3.40    0.20
  17   1  -5    3.50    0.20
 -16  -1   5    0.90    0.10
  16  -1  -5    1.40    0.10
  16  -1  -5    0.90    0.10
  16  -1  -5    0.90    0.10
 -16   1   5    1.00    0.10
  16   1  -5    1.00    0.10
 -16   1   5    0.90    0.10
 -16   1   5    1.30    0.10
 -16   1   5    0.90    0.10
  16   1  -5    0.80    0.10
 -15  -1   5   22.90    0.80
 -15  -1   5   25.10    0.80
  15  -1  -5   25.00    0.80
  15  -1  -5   25.10    0.80
  15  -1  -5   25.10    0.80
  15   1  -5   24.90    0.80
 -15   1   5   24.60    0.80
 -15   1   5   25.00    0.80
 -15   1   5   24.60    0.80
 -15   1   5   23.90    0.80
  15   1  -5   24.60    0.80
 -15   1   5   25.40    0.80
 -14  -1   5   31.70    1.00
  14  -1  -5   31.00    1.00
  14  -1  -5   31.90    1.00
 -14  -1   5   29.10    1.00
 -14   1   5   31.20    1.00
 -14   1   5   32.50    1.00
 -14   1   5   30.70    1.00
 -14   1   5   29.50    1.00
  14   1  -5   30.00    1.00
  14   1  -5   31.30    1.00
 -14   1   5   31.20    1.00
 -14   1   5   31.50    1.00
  14   1  -5   30.10    1.00
 -13  -1   5    1.80    0.20
 -13  -1   5    1.80    0.20
  13  -1  -5    2.00    0.20
  13  -1  -5    1.80    0.20
  13   1  -5    1.80    0.20
 -13   1   5    1.90    0.20
 -13   1   5    1.90    0.20
  13   1  -5    1.90    0.20
 -13   1   5    1.80    0.20
  13   1  -5    2.10    0.20
 -13   1   5    1.70    0.20
 -13   1   5    2.10    0.20
 -13   1   5    1.70    0.20
 -12  -1   5    3.90    0.20
 -12  -1   5    3.80    0.20
  12  -1  -5    4.00    0.20
  12  -1  -5    4.00    0.20
  12  -1  -5    3.60    0.40
  12   1  -5    3.90    0.20
 -12   1   5    4.20    0.30
 -12   1   5    3.90    0.20
 -12   1   5    3.90    0.20
  12   1  -5    4.30    0.20
 -12   1   5    4.00    0.20
  12   1  -5    3.70    0.50
 -12   1   5    3.90    0.20
 -12   1   5    3.60    0.20
  11  -1  -5   74.99    2.50
 -11  -1   5   74.79    2.30
 -11  -1   5   73.49    2.30
 -11  -1   5   75.09    2.30
  11   1  -5   73.69    2.30
  11   1  -5   72.49    2.30
 -11   1   5   77.39    2.30
 -11   1   5   76.19    2.30
 -11   1   5   77.49    2.30
 -11   1   5   78.19    2.30
 -11   1   5   77.09    2.30
  11   1  -5   78.39    2.30
  11   1  -5   76.79    2.50
 -11   1   5   71.69    2.30
  10  -1  -5    0.20    0.10
 -10  -1   5    0.10    0.10
  10  -1  -5    0.10    0.20
 -10  -1   5    0.20    0.10
 -10  -1   5    0.10    0.10
  10   1  -5    0.20    0.10
  10   1  -5    0.20    0.10
 -10   1   5    0.10    0.10
  10   1  -5    0.30    0.10
 -10   1   5    0.30    0.10
  10   1  -5    0.70    0.20
 -10   1   5    0.10    0.10
 -10   1   5    0.20    0.10
 -10   1   5    0.40    0.10
   9  -1  -5    9.90    0.50
   9  -1  -5    9.50    0.40
   9   1  -5   10.20    0.50
   9   1  -5    9.40    0.50
   9   1  -5   10.20    0.30
   8  -1  -5   24.40    0.90
   8  -1  -5   23.50    0.80
   8   1  -5   24.60    0.90
   7  -1  -5  675.33   20.50
   7  -1  -5  668.83   20.40
   7   1  -5  690.43   20.40
   7   1  -5  736.33   20.40
   6  -1  -5  362.96   11.00
   6  -1  -5  380.26   11.00
  -6  -1   5  390.36   11.00
   6   1  -5  372.46   11.00
  -6   1   5  374.96   11.00
   6   1  -5  355.06   11.00
  -5  -1   5  305.37    9.00
   5  -1  -5  302.07    9.00
  -5   1   5  311.77    9.00
   5   1  -5  297.57    9.00
   4  -1  -5   86.29    2.50
  -4  -1   5   85.99    2.60
  -4  -1   5   80.69    2.60
   4   1  -5   84.99    2.60
  -4   1   5   84.39    2.60
  -3  -1   5 1333.47   40.00
  -3  -1   5 1359.06   39.90
   3  -1  -5 1337.47   39.70
  -3   1   5 1331.97   39.90
   3   1  -5 1276.07   39.80
   3   1  -5 1492.35   40.30
  -2  -1   5    0.50    0.10
  -2  -1   5    0.50    0.10
   1  -1  -5  902.21   27.00
  -1  -1   5  900.71   26.90
  -1  -1   5  900.11   26.90
  -1   1   5  940.21   27.00
   0  -1  -5   33.50    1.10
   0  -1   5   39.50    1.20
   0  -1   5   34.50    1.20
   0   1   5   36.30    1.20
   1  -1   5  194.88    6.00
   1  -1   5  190.58    6.10
   1   1   5  224.18    6.10
   2  -1   5 1181.78   35.30
   2  -1   5 1199.18   38.80
   2   1   5 1205.68   35.30
   3  -1   5  120.29    3.70
   3   1   5  122.79    3.70
   4  -1   5  100.19    3.10
   4   1   5  101.09    3.10
  -5  -1  -5  192.78    6.00
   5  -1   5  211.48    6.20
   5   1   5  207.08    6.20
  -6  -1  -5   41.10    1.40
  -6  -1  -5   42.90    1.30
   6  -1   5   44.60    1.50
   6   1   5   46.00    1.50
   6   1   5   43.20    1.40
  -6   1  -5   42.40    1.40
   6   1   5   43.00    1.30
   7  -1   5   76.19    2.50
   7  -1   5   75.59    2.30
  -7  -1  -5   77.89    2.30
  -7   1  -5   76.49    2.30
  -7   1  -5   75.39    2.30
   7   1   5   78.09    2.30
  -7   1  -5   72.39    2.30
   7   1   5   77.89    2.50
   8  -1   5    3.10    0.20
  -8  -1  -5    2.80    0.20
   8  -1   5    2.90    0.40
   8   1   5    2.80    0.40
  -8   1  -5    3.00    0.20
  -8   1  -5    2.90    0.20
   8   1   5    2.80    0.20
  -9  -1  -5  243.88    7.10
   9  -1   5  237.98    7.10
   9   1   5  233.98    7.10
  -9   1  -5  240.08    7.10
  10  -1   5    0.40    0.10
 -10  -1  -5    0.40    0.10
 -10   1  -5    0.50    0.10
  10   1   5    0.70    0.10
 -10   1  -5    0.50    0.10
  11  -1   5    0.00    0.10
 -11  -1  -5    0.10    0.10
  11   1   5    0.20    0.10
 -11   1  -5    0.00    0.10
  12  -1   5  134.39    4.20
 -12  -1  -5  145.09    4.20
 -12   1  -5  142.79    4.20
  12   1   5  138.09    4.20
  13  -1   5  180.68    5.60
 -13  -1  -5  197.58    5.60
  13   1   5  185.28    5.60
 -13   1  -5  189.88    5.60
 -14  -1  -5  102.39    3.00
 -17  -2   5   24.50    0.80
 -17   2   5   22.90    0.80
 -17   2   5   23.80    0.80
  17   2  -5   25.80    0.80
  16  -2  -5   32.90    1.00
  16  -2  -5   33.50    1.10
 -16  -2   5   33.90    1.10
  16  -2  -5   33.30    1.10
 -16   2   5   32.80    1.00
 -16   2   5   33.10    1.10
  16   2  -5   35.30    1.10
 -16   2   5   34.30    1.10
 -16   2   5   33.40    1.10
 -15  -2   5    4.40    0.20
  15  -2  -5    4.40    0.20
  15  -2  -5    4.10    0.20
 -15   2   5    4.40    0.30
 -15   2   5    4.80    0.30
 -15   2   5    4.30    0.20
  15   2  -5    4.70    0.30
  15   2  -5    4.20    0.20
 -15   2   5    4.30    0.20
 -15   2   5    4.60    0.20
  14  -2  -5    9.40    0.40
 -14  -2   5    8.20    0.40
 -14  -2   5    9.40    0.40
  14  -2  -5    9.20    0.40
 -14   2   5    9.60    0.40
  14   2  -5    9.20    0.40
 -14   2   5    9.00    0.40
  14   2  -5    9.10    0.40
 -14   2   5    9.30    0.40
  14   2  -5    8.80    0.40
 -14   2   5    8.90    0.40
 -14   2   5    9.30    0.40
 -13  -2   5   67.89    2.30
 -13  -2   5   76.49    2.30
  13  -2  -5   76.39    2.30
 -13   2   5   76.39    2.30
 -13   2   5   75.89    2.30
 -13   2   5   74.59    2.30
  13   2  -5   71.09    2.30
 -13   2   5   76.19    2.30
  13   2  -5   72.69    2.30
 -13   2   5   78.99    2.30
  13   2  -5   76.79    2.30
 -12  -2   5   81.79    2.40
  12  -2  -5   78.69    2.40
 -12  -2   5   73.79    2.40
 -12   2   5   79.89    2.40
  12   2  -5   75.69    2.40
 -12   2   5   80.09    2.50
 -12   2   5   84.79    2.40
  12   2  -5   82.89    2.40
  12   2  -5   77.19    2.40
 -12   2   5   79.69    2.40
 -12   2   5   81.29    2.40
  11  -2  -5    8.10    0.60
 -11  -2   5    8.90    0.40
  11  -2  -5    8.70    0.30
 -11  -2   5    9.10    0.40
 -11   2   5    9.30    0.40
  11   2  -5    8.70    0.40
 -11   2   5    9.10    0.40
  11   2  -5    9.20    0.40
 -11   2   5   10.30    0.40
 -11   2   5    9.20    0.40
 -11   2   5   10.10    0.40
  11   2  -5    9.20    0.40
 -10  -2   5    3.10    0.20
  10  -2  -5    2.90    0.40
 -10  -2   5    3.30    0.20
 -10   2   5    3.30    0.20
  10   2  -5    3.20    0.20
 -10   2   5    3.10    0.20
 -10   2   5    3.40    0.20
  10   2  -5    3.30    0.20
  10   2  -5    3.30    0.20
 -10   2   5    3.60    0.20
  -9  -2   5   86.49    2.70
  -9  -2   5   86.39    2.70
   9  -2  -5   87.99    2.80
   9   2  -5   82.59    2.70
  -9   2   5   86.69    2.70
  -9   2   5   91.89    2.60
   9   2  -5   88.39    2.60
  -9   2   5   87.19    2.60
  -9   2   5   88.59    2.70
  -9   2   5   94.29    2.70
   9   2  -5   88.69    2.70
   8  -2  -5    1.20    0.10
   8  -2  -5    0.80    0.20
  -8   2   5    1.00    0.10
   8   2  -5    1.20    0.10
   7  -2  -5   22.20    0.80
   7  -2  -5   21.60    0.70
   6  -2  -5   13.30    0.40
   6  -2  -5   13.80    0.50
   6  -2  -5   13.00    0.40
   6   2  -5   14.00    0.50
   6   2  -5   13.50    0.60
   5  -2  -5  255.57    7.60
   5   2  -5  259.07    7.70
   5   2  -5  251.47    7.60
   4  -2  -5  275.17    8.00
  -4  -2   5  270.77    8.00
   4   2  -5  265.67    8.10
  -4   2   5  272.37    8.00
   4   2  -5  272.27    8.00
  -3  -2   5  485.15   14.50
   3  -2  -5  472.95   14.30
  -3  -2   5  505.25   14.40
  -3   2   5  490.15   14.40
   3   2  -5  490.25   14.50
   2  -2  -5  427.96   13.20
  -2  -2   5  450.25   13.30
   2  -2  -5  471.65   13.30
  -2  -2   5  446.16   13.40
   2   2  -5  457.95   13.40
  -2   2   5  452.85   13.30
  -1  -2   5   15.40    0.50
  -1  -2   5   14.60    0.60
  -1   2   5   15.90    0.50
   0  -2   5  213.08    6.30
   0  -2   5  207.48    6.20
   0   2   5  208.08    6.20
   1  -2   5  765.02   22.30
   1  -2   5  764.12   22.20
   1   2   5  739.73   22.20
   2  -2   5  410.96   11.40
   2  -2   5  401.16   11.50
   2   2   5  344.27   11.40
  -3  -2  -5  309.27    9.10
   3  -2   5  317.87    9.30
   3   2   5  306.67    9.20
   4  -2   5    0.10    0.10
  -4  -2  -5    0.10    0.10
   4  -2   5    0.00    0.10
   4   2   5    0.10    0.10
  -5  -2  -5   72.29    2.10
  -5  -2  -5   70.19    2.20
   5  -2   5   69.89    2.10
   5   2   5   73.69    2.30
   5   2   5   72.59    2.20
   5   2   5   74.49    2.20
  -5   2  -5   71.49    2.20
  -5   2  -5   68.79    2.20
   6  -2   5    2.90    0.30
  -6  -2  -5    2.10    0.20
  -6  -2  -5    2.70    0.10
  -6   2  -5    2.70    0.20
   6   2   5    2.40    0.20
   6   2   5    2.40    0.30
  -6   2  -5    2.70    0.20
   7  -2   5   54.69    2.10
  -7  -2  -5   61.99    1.90
  -7  -2  -5   59.39    1.80
   7   2   5   62.89    1.90
  -7   2  -5   61.79    1.90
  -7   2  -5   62.39    1.90
  -8  -2  -5   23.60    0.80
   8  -2   5   22.80    0.80
   8   2   5   23.80    0.80
  -8   2  -5   23.00    0.80
  -8   2  -5   24.40    0.80
   9  -2   5  465.75   14.30
  -9  -2  -5  500.65   14.40
  -9   2  -5  497.75   14.30
  -9   2  -5  490.25   14.30
   9   2   5  483.35   14.30
 -10  -2  -5    1.40    0.20
  10  -2   5    2.10    0.20
 -10   2  -5    1.90    0.20
 -10   2  -5    1.70    0.20
  10   2   5    1.80    0.20
 -11  -2  -5   20.80    0.70
 -11   2  -5   20.10    0.70
  11   2   5   20.00    0.70
 -11   2  -5   20.30    0.70
 -12  -2  -5    8.10    0.30
 -12   2  -5    8.10    0.30
  12   2   5    8.00    0.30
 -12   2  -5    8.30    0.30
 -13  -2  -5    3.00    0.20
  13   2   5    2.90    0.20
 -13   2  -5    3.00    0.20
  16  -3  -5   11.60    0.40
 -16   3   5   11.80    0.40
 -16   3   5   11.30    0.40
 -16   3   5   11.40    0.40
 -16   3   5   11.00    0.40
  16   3  -5   11.80    0.40
 -15  -3   5   36.80    1.20
  15  -3  -5   38.00    1.10
  15  -3  -5   35.60    1.20
  15   3  -5   38.20    1.20
 -15   3   5   37.60    1.20
 -15   3   5   39.10    1.20
 -15   3   5   36.20    1.20
 -15   3   5   37.30    1.20
 -15   3   5   36.40    1.20
  14  -3  -5    1.90    0.10
 -14  -3   5    1.90    0.20
  14  -3  -5    1.90    0.20
 -14   3   5    1.80    0.20
 -14   3   5    1.80    0.20
 -14   3   5    2.00    0.20
 -14   3   5    1.50    0.20
 -14   3   5    1.60    0.20
  14   3  -5    2.00    0.20
  13  -3  -5  102.29    3.00
 -13  -3   5  101.19    3.10
  13   3  -5  103.59    3.10
  13   3  -5   95.59    3.10
 -13   3   5   99.49    3.10
 -13   3   5  101.19    3.10
 -13   3   5  103.49    3.10
 -13   3   5  102.69    3.10
 -13   3   5  103.49    3.10
  12  -3  -5   83.29    2.50
 -12  -3   5   84.19    2.60
 -12   3   5   88.69    2.60
 -12   3   5   83.49    2.60
 -12   3   5   81.59    2.60
  12   3  -5   85.69    2.60
  12   3  -5   82.59    2.60
 -12   3   5   86.49    2.60
 -12   3   5   86.89    2.60
  11  -3  -5 1119.19   33.10
 -11  -3   5 1123.89   33.20
 -11   3   5 1146.99   33.10
 -11   3   5 1162.18   33.20
  11   3  -5 1132.29   33.10
 -11   3   5 1144.49   33.10
  11   3  -5 1085.49   33.10
 -11   3   5 1148.59   33.10
 -11   3   5 1111.59   33.10
  10   3  -5  134.69    4.10
 -10   3   5  137.09    4.10
 -10   3   5  141.89    4.10
 -10   3   5  134.89    4.10
 -10   3   5  137.09    4.10
  10   3  -5  135.89    4.10
 -10   3   5  138.69    4.10
   9   3  -5  171.78    5.00
  -9   3   5  175.98    5.00
  -9   3   5  160.78    5.00
  -9   3   5  168.88    5.00
  -9   3   5  165.98    5.00
  -9   3   5  173.08    5.00
   9   3  -5  156.08    5.00
   8   3  -5   15.80    0.60
   8   3  -5   15.20    0.60
  -8   3   5   16.50    0.60
  -8   3   5   16.40    0.60
  -8   3   5   16.90    0.60
  -8   3   5   16.10    0.60
  -7  -3   5   85.09    2.60
   7   3  -5   82.69    2.60
  -7   3   5   87.89    2.60
  -7   3   5   88.59    2.60
  -7   3   5   86.89    2.60
   7   3  -5   85.09    2.60
  -6  -3   5    0.30    0.10
  -6   3   5    0.00    0.10
  -6   3   5    0.20    0.10
   6   3  -5    0.40    0.10
   6   3  -5    0.60    0.10
  -6   3   5    0.00    0.10
   5   3  -5    2.80    0.20
  -5   3   5    2.80    0.20
   4  -3  -5   29.00    0.90
  -4   3   5   29.10    0.90
   3  -3  -5  279.87    8.50
  -3   3   5  293.27    8.40
   2  -3  -5  113.69    3.40
   1  -3  -5    0.10    0.10
  -1  -3   5    0.10    0.10
   0  -3   5   38.90    1.20
   0  -3  -5   39.70    1.30
   0   3   5   38.30    1.20
  -1  -3  -5   34.90    1.20
   1  -3   5   33.50    1.10
  -1  -3  -5   36.40    1.10
   1   3   5   34.50    1.10
  -2  -3  -5    6.90    0.30
   2  -3   5    6.80    0.30
   2  -3   5    6.90    0.30
   2   3   5    7.30    0.30
   2   3   5    7.20    0.30
  -2   3  -5    7.00    0.30
  -2   3  -5    7.00    0.30
   2   3   5    6.60    0.30
  -3  -3  -5  161.68    4.50
   3  -3   5  149.69    4.50
   3  -3   5  152.08    4.50
  -3   3  -5  154.88    4.50
  -3   3  -5  148.79    4.50
   3   3   5  154.78    4.50
  -3   3  -5  148.69    4.50
   3   3   5  144.99    4.50
   3   3   5  155.08    4.50
   3   3   5  146.29    4.50
  -4  -3  -5   57.89    1.60
   4  -3   5   56.09    1.70
   4  -3   5   53.39    1.60
   4   3   5   49.99    1.70
   4   3   5   55.19    1.70
  -4   3  -5   52.89    1.70
   4   3   5   51.79    1.60
  -4   3  -5   54.49    1.70
   4   3   5   55.59    1.70
  -4   3  -5   52.59    1.70
  -5  -3  -5   11.30    0.40
  -5  -3  -5   10.20    0.40
   5  -3   5   11.30    0.40
   5  -3   5   10.30    0.40
   5   3   5   10.50    0.40
  -5   3  -5   10.50    0.40
  -5   3  -5   11.00    0.40
  -5   3  -5   10.90    0.40
   5   3   5   11.40    0.40
   5   3   5   11.70    0.40
   5   3   5   10.70    0.40
   6  -3   5    3.00    0.20
  -6  -3  -5    3.00    0.20
  -6  -3  -5    3.00    0.20
   6  -3   5    2.90    0.20
   6   3   5    2.70    0.20
  -6   3  -5    3.00    0.20
   6   3   5    3.00    0.20
   6   3   5    2.90    0.20
  -6   3  -5    3.30    0.20
  -7  -3  -5   57.19    1.80
  -7  -3  -5   54.29    1.70
  -7   3  -5   59.09    1.80
   7   3   5   58.69    1.80
   7   3   5   55.39    1.80
  -7   3  -5   58.99    1.80
  -8  -3  -5   27.00    0.90
   8   3   5   26.90    0.90
  -8   3  -5   27.30    0.90
  -8   3  -5   28.20    0.90
  -9  -3  -5   19.80    0.70
   9   3   5   19.30    0.70
  -9   3  -5   21.00    0.70
  -9   3  -5   20.20    0.70
 -10  -3  -5    0.30    0.10
 -10   3  -5    0.40    0.10
  10   3   5    0.40    0.10
 -10   3  -5    0.30    0.10
 -11  -3  -5    0.10    0.10
 -11   3  -5    0.20    0.10
  11   3   5    0.20    0.10
 -11   3  -5    0.10    0.10
 -12  -3  -5   39.80    1.20
 -12   3  -5   41.20    1.20
  12   3   5   37.40    1.30
 -12   3  -5   40.70    1.20
  14  -4  -5    1.40    0.10
  14   4  -5    1.80    0.10
 -14   4   5    1.60    0.10
 -14   4   5    1.50    0.10
 -14   4   5    1.70    0.10
  13   4  -5   68.29    2.00
 -13   4   5   65.39    2.00
 -13   4   5   66.99    2.00
 -13   4   5   65.89    2.00
 -13   4   5   68.49    2.00
  12  -4  -5    0.20    0.10
 -12   4   5    0.20    0.10
  12   4  -5    0.20    0.10
 -12   4   5    0.20    0.10
 -12   4   5    0.20    0.10
 -12   4   5    0.30    0.10
  11  -4  -5    3.60    0.20
  11   4  -5    3.30    0.20
 -11   4   5    3.50    0.20
 -11   4   5    4.60    0.20
  11   4  -5    3.80    0.20
 -11   4   5    3.70    0.20
 -11   4   5    3.40    0.20
  10  -4  -5   72.19    2.20
  10   4  -5   72.89    2.30
 -10   4   5   75.09    2.30
  10   4  -5   72.79    2.30
 -10   4   5   76.39    2.30
 -10   4   5   76.19    2.30
 -10   4   5   76.69    2.30
   9  -4  -5   40.30    1.20
  -9   4   5   41.90    1.30
   9   4  -5   40.20    1.30
  -9   4   5   40.70    1.30
  -9   4   5   42.30    1.30
   9   4  -5   39.60    1.30
  -8  -4   5   18.50    0.70
   8   4  -5   18.10    0.60
   8   4  -5   17.70    0.70
  -8   4   5   18.90    0.60
  -8   4   5   18.60    0.60
  -8   4   5   18.90    0.70
  -7  -4   5    0.50    0.10
  -7   4   5    0.40    0.10
  -7   4   5    0.30    0.10
  -7   4   5    0.10    0.10
   7   4  -5    0.40    0.10
   7   4  -5    0.40    0.10
  -6  -4   5    4.30    0.30
  -6   4   5    4.10    0.20
  -6   4   5    4.60    0.20
   6   4  -5    4.00    0.20
   6   4  -5    4.20    0.30
  -6   4   5    4.30    0.20
  -6   4   5    4.30    0.20
  -5  -4   5   40.40    1.30
  -5  -4   5   37.30    1.20
   5   4  -5   35.40    1.20
   5   4  -5   38.30    1.20
   5   4  -5   38.80    1.20
  -5   4   5   39.50    1.20
  -5   4   5   39.00    1.20
  -5   4   5   39.30    1.20
  -5   4   5   40.90    1.20
  -4  -4   5   65.69    2.00
  -4  -4   5   69.99    2.10
  -4   4   5   68.59    2.00
  -4   4   5   67.89    2.10
   4   4  -5   69.09    2.10
   4   4  -5   61.49    2.00
   4   4  -5   65.39    2.10
  -4   4   5   73.59    2.10
  -4   4   5   69.19    2.10
  -3  -4   5   38.50    1.20
  -3  -4   5   35.10    1.10
  -3   4   5   36.60    1.20
  -3   4   5   37.90    1.10
   3   4  -5   34.30    1.10
  -3   4   5   36.30    1.20
  -3   4   5   37.50    1.20
   3   4  -5   35.00    1.10
   3   4  -5   37.20    1.20
  -2  -4   5  215.08    6.40
  -2  -4   5  220.68    6.40
  -2  -4   5  209.28    6.40
  -2   4   5  212.98    6.40
   2   4  -5  209.08    6.40
  -2   4   5  216.18    6.40
  -2   4   5  223.28    6.40
  -2   4   5  220.08    6.40
   2   4  -5  218.18    6.40
  -1  -4   5  232.58    7.10
   1  -4  -5  234.48    7.10
  -1  -4   5  249.28    7.20
  -1  -4   5  244.58    7.20
  -1   4   5  249.28    7.20
   1   4  -5  242.88    7.20
   1   4  -5  241.18    7.10
  -1   4   5  241.38    7.20
  -1   4   5  244.68    7.20
  -1   4   5  243.18    7.20
   0  -4  -5  108.99    3.20
   0  -4   5  104.09    3.20
   0  -4   5  103.09    3.20
   0  -4   5  106.59    3.20
   0   4   5  101.89    3.20
   0   4   5  110.19    3.20
   0   4  -5  102.19    3.20
   0   4   5  107.39    3.20
   0   4   5  106.49    3.20
   0   4  -5  109.09    3.20
  -1  -4  -5  629.44   17.50
   1  -4   5  580.54   17.60
   1  -4   5  579.84   17.50
   1  -4   5  587.64   17.60
   1   4   5  624.14   17.60
  -1   4  -5  574.94   17.60
   1   4   5  607.64   17.60
   1   4   5  592.24   17.60
  -1   4  -5  611.84   17.60
   1   4   5  588.24   17.50
  -1   4  -5  602.14   17.50
   2  -4   5  156.48    4.80
   2  -4   5  156.98    4.80
   2  -4   5  157.88    4.80
  -2  -4  -5  165.88    4.80
  -2   4  -5  158.48    4.80
   2   4   5  161.28    4.80
   2   4   5  159.48    4.80
   2   4   5  166.88    4.80
  -2   4  -5  162.08    4.80
   2   4   5  160.38    4.80
  -3  -4  -5    4.30    0.20
   3  -4   5    4.10    0.20
   3  -4   5    4.00    0.20
  -3   4  -5    4.10    0.30
   3   4   5    4.00    0.30
  -3   4  -5    3.90    0.20
   3   4   5    4.10    0.20
   3   4   5    4.40    0.30
   3   4   5    4.10    0.20
   4  -4   5  142.19    4.50
   4  -4   5  154.68    4.50
  -4  -4  -5  148.59    4.50
  -4   4  -5  153.08    4.50
   4   4   5  149.69    4.50
  -4   4  -5  146.99    4.50
   4   4   5  157.88    4.50
   4   4   5  152.58    4.50
   4   4   5  148.49    4.50
  -5  -4  -5  208.78    6.10
   5  -4   5  205.38    6.10
   5  -4   5  196.48    6.10
  -5   4  -5  207.98    6.10
   5   4   5  208.08    6.10
  -5   4  -5  205.88    6.10
   5   4   5  210.58    6.10
  -5   4  -5  199.08    6.10
   5   4   5  202.18    6.10
   5   4   5  209.38    6.10
   6  -4   5    9.30    0.40
  -6  -4  -5    9.00    0.30
   6   4   5    9.60    0.40
   6   4   5    9.20    0.40
   6   4   5    9.30    0.30
  -6   4  -5    8.90    0.40
   6   4   5    9.50    0.40
  -6   4  -5    9.00    0.40
  -6   4  -5    9.30    0.40
  -7  -4  -5    0.70    0.10
   7   4   5    0.70    0.10
  -7   4  -5    0.80    0.10
   7   4   5    0.90    0.10
  -7   4  -5    0.80    0.10
  -7   4  -5    0.90    0.10
   8   4   5    5.00    0.20
   8   4   5    4.80    0.20
  -8   4  -5    4.70    0.20
  -8   4  -5    4.60    0.20
  -9   4  -5   16.40    0.60
   9   4   5   17.00    0.60
  -9   4  -5   16.80    0.60
  10   4   5   12.40    0.40
 -10   4  -5   12.40    0.40
 -10   4  -5   13.30    0.40
 -12   5   5    2.60    0.10
 -12   5   5    2.50    0.20
  11  -5  -5   23.80    0.80
 -11   5   5   24.60    0.80
  11   5  -5   25.50    0.80
 -11   5   5   25.40    0.80
 -11   5   5   26.60    0.80
  10  -5  -5   58.89    1.80
 -10   5   5   58.79    1.80
 -10   5   5   57.59    1.80
 -10   5   5   61.69    1.80
  10   5  -5   59.49    1.80
   9  -5  -5    2.30    0.10
   9   5  -5    1.90    0.10
  -9   5   5    1.90    0.20
  -9   5   5    2.20    0.20
  -9   5   5    2.20    0.20
   9   5  -5    2.10    0.20
   8  -5  -5   63.49    1.90
  -8  -5   5   61.79    1.90
  -8   5   5   63.79    1.90
   8   5  -5   61.69    1.90
  -8   5   5   62.49    1.90
  -8   5   5   64.19    1.90
   8   5  -5   62.19    1.90
   7  -5  -5   92.19    2.80
  -7  -5   5   96.69    2.90
   7   5  -5   91.29    2.80
  -7   5   5   94.39    2.80
  -7   5   5   94.79    2.80
  -7   5   5   93.69    2.80
   7   5  -5   94.69    2.80
   6  -5  -5   51.39    1.60
  -6  -5   5   54.29    1.60
  -6   5   5   49.50    1.60
  -6   5   5   51.19    1.60
   6   5  -5   51.59    1.60
   6   5  -5   51.59    1.60
  -6   5   5   50.59    1.60
  -6   5   5   52.99    1.60
  -5  -5   5   31.00    1.00
  -5  -5   5   33.70    1.10
   5  -5  -5   31.50    1.00
   5   5  -5   30.60    1.00
  -5   5   5   32.00    1.00
  -5   5   5   32.30    1.00
   5   5  -5   31.70    1.00
  -5   5   5   33.60    1.00
  -4  -5   5    7.30    0.40
  -4  -5   5    7.00    0.30
   4  -5  -5    6.90    0.30
  -4   5   5    7.30    0.30
  -4   5   5    7.70    0.30
   4   5  -5    7.10    0.30
   4   5  -5    6.70    0.30
   4   5  -5    7.20    0.30
  -4   5   5    7.20    0.30
  -4   5   5    6.70    0.30
   3  -5  -5    0.20    0.10
  -3  -5   5    0.20    0.10
  -3  -5   5    0.30    0.10
   3   5  -5    0.20    0.10
  -3   5   5    0.10    0.10
   3   5  -5    0.20    0.10
  -3   5   5    0.20    0.10
   3   5  -5    0.30    0.10
  -3   5   5    0.30    0.10
  -3   5   5    0.20    0.10
   2  -5  -5   32.80    1.00
  -2  -5   5   34.70    1.10
  -2  -5   5   32.10    1.10
  -2   5   5   33.20    1.00
   2   5  -5   33.90    1.10
  -2   5   5   32.90    1.10
   2   5  -5   33.10    1.00
   2   5  -5   32.50    1.20
  -2   5   5   34.70    1.10
  -2   5   5   32.70    1.10
   1  -5  -5    8.80    0.30
  -1  -5   5    9.10    0.40
  -1  -5   5    8.70    0.40
  -1   5   5    8.40    0.40
  -1   5   5    8.40    0.40
  -1   5   5    8.80    0.40
   1   5  -5    8.60    0.40
  -1   5   5    8.40    0.30
   0  -5  -5  227.78    6.70
   0  -5   5  230.38    6.80
   0  -5   5  227.08    6.80
   0   5   5  225.18    6.70
   0   5   5  232.48    6.80
   0   5  -5  227.38    6.80
   0   5   5  228.28    6.80
   0   5   5  229.18    6.80
   1  -5   5  226.18    6.60
  -1  -5  -5  224.78    6.60
   1  -5   5  213.88    6.70
   1   5   5  225.98    6.70
   1   5   5  228.48    6.70
  -1   5  -5  228.98    6.70
   1   5   5  224.18    6.70
   1   5   5  223.08    6.60
   2  -5   5   21.40    0.70
   2  -5   5   19.10    0.70
  -2  -5  -5   21.40    0.70
   2   5   5   21.30    0.70
   2   5   5   21.50    0.80
   2   5   5   20.70    0.70
  -2   5  -5   21.40    0.70
   2   5   5   21.40    0.70
   3  -5   5   10.00    0.40
  -3  -5  -5    9.50    0.40
   3   5   5    9.50    0.40
   3   5   5    9.60    0.40
   3   5   5    9.80    0.40
   3   5   5    9.10    0.40
  -3   5  -5    9.90    0.40
   4  -5   5   -0.10    0.10
  -4  -5  -5    0.10    0.10
   4   5   5    0.20    0.10
  -4   5  -5    0.20    0.10
   4   5   5    0.20    0.10
   4   5   5    0.20    0.10
   4   5   5    0.10    0.10
   5  -5   5    2.20    0.20
  -5  -5  -5    2.00    0.10
   5   5   5    2.30    0.20
   5   5   5    2.10    0.20
  -5   5  -5    2.00    0.20
  -5   5  -5    1.90    0.10
   5   5   5    2.30    0.20
   5   5   5    2.40    0.10
  -6  -5  -5    3.40    0.20
   6  -5   5    3.40    0.20
   6   5   5    3.50    0.20
   6   5   5    3.60    0.20
  -6   5  -5    3.60    0.20
   6   5   5    3.80    0.20
  -6   5  -5    3.60    0.20
  -7   5  -5   13.60    0.50
  -7   5  -5   13.30    0.40
   7   5   5   13.30    0.40
   7   5   5   11.90    0.50
  -7  -6   5   30.40    1.00
  -7   6   5   33.10    1.00
  -6  -6   5    2.10    0.20
   6   6  -5    1.90    0.10
  -6   6   5    2.20    0.10
  -6   6   5    2.40    0.10
   5  -6  -5    0.00    0.10
  -5  -6   5    0.00    0.10
   5  -6  -5    0.10    0.10
  -5   6   5    0.10    0.10
   5   6  -5    0.00    0.10
  -5   6   5    0.00    0.10
  -5   6   5    0.10    0.10
  -4  -6   5   36.60    1.10
   4  -6  -5   38.00    1.10
  -4  -6   5   38.60    1.20
  -4   6   5   37.90    1.20
  -4   6   5   37.70    1.10
  -4   6   5   37.60    1.20
   4   6  -5   36.60    1.20
  -3  -6   5   48.60    1.40
  -3  -6   5   48.20    1.50
   3  -6  -5   48.40    1.40
   3  -6  -5   42.20    1.40
  -3   6   5   48.30    1.40
   3   6  -5   46.30    1.40
  -3   6   5   49.70    1.40
  -3   6   5   47.50    1.40
  -3   6   5   43.50    1.40
   2  -6  -5    0.70    0.10
  -2  -6   5    0.90    0.10
  -2  -6   5    0.60    0.10
   2  -6  -5    0.70    0.10
  -2   6   5    0.70    0.10
  -2   6   5    0.90    0.10
  -2   6   5    0.60    0.10
  -2   6   5    1.10    0.10
   2   6  -5    0.70    0.10
   1  -6  -5    4.70    0.20
  -1  -6   5    4.40    0.20
   1  -6  -5    4.60    0.20
  -1  -6   5    3.80    0.20
  -1   6   5    4.10    0.20
  -1   6   5    4.20    0.20
   1   6  -5    4.10    0.20
  -1   6   5    3.80    0.20
  -1   6   5    4.00    0.20
   0  -6   5    1.80    0.20
   0  -6  -5    1.90    0.20
   0  -6  -5    2.00    0.10
   0  -6   5    2.00    0.10
   0   6   5    2.00    0.10
   0   6   5    2.00    0.20
   0   6   5    2.10    0.20
   0   6  -5    2.20    0.20
   0   6   5    1.90    0.10
  -1  -6  -5    4.60    0.20
   1  -6   5    4.60    0.20
   1  -6   5    4.00    0.20
  -1  -6  -5    4.50    0.20
   1   6   5    4.60    0.20
   1   6   5    4.40    0.20
   1   6   5    4.80    0.20
   1   6   5    4.40    0.20
  -1   6  -5    4.50    0.20
  -2  -6  -5    5.70    0.30
   2  -6   5    5.50    0.20
   2   6   5    5.90    0.20
   2   6   5    5.70    0.20
   2   6   5    5.60    0.30
   2   6   5    5.60    0.20
  -2   6  -5    5.80    0.20
  -3  -6  -5    0.30    0.10
   3  -6   5    0.60    0.10
   3   6   5    0.30    0.10
   3   6   5    0.40    0.10
  -3   6  -5    0.40    0.10
  18   0  -6    1.80    0.10
 -18   0   6    1.60    0.10
  17   0  -6   40.80    1.20
 -17   0   6   37.70    1.20
 -17   0   6   38.60    1.20
 -17   0   6   36.60    1.20
  17   0  -6   36.90    1.20
 -16   0   6   37.10    1.20
  16   0  -6   39.50    1.20
  16   0  -6   42.00    1.30
 -16   0   6   40.30    1.20
  16   0  -6   38.80    1.20
 -16   0   6   38.40    1.20
 -16   0   6   38.20    1.20
 -15   0   6    1.80    0.20
 -15   0   6    1.60    0.20
 -15   0   6    1.40    0.20
  15   0  -6    1.80    0.20
 -15   0   6    1.80    0.20
  15   0  -6    2.00    0.20
  15   0  -6    2.00    0.20
 -15   0   6    1.70    0.20
 -14   0   6   77.59    2.40
 -14   0   6   75.69    2.40
 -14   0   6   75.69    2.40
 -14   0   6   79.39    2.40
  14   0  -6   83.59    2.40
  14   0  -6   77.79    2.40
 -14   0   6   77.89    2.40
  14   0  -6   78.49    2.40
 -13   0   6   15.80    0.60
 -13   0   6   15.80    0.60
  13   0  -6   15.70    0.60
 -13   0   6   16.10    0.60
  13   0  -6   16.20    0.50
 -13   0   6   15.40    0.60
  13   0  -6   15.30    0.60
 -13   0   6   16.00    0.60
 -12   0   6    3.80    0.20
 -12   0   6    3.80    0.20
  12   0  -6    3.90    0.20
 -12   0   6    4.00    0.20
 -12   0   6    3.80    0.20
 -12   0   6    4.00    0.20
  12   0  -6    3.90    0.20
  12   0  -6    3.90    0.40
 -11   0   6   23.30    0.80
  11   0  -6   25.10    1.00
 -11   0   6   27.70    0.80
  11   0  -6   24.20    0.80
 -11   0   6   24.50    0.80
 -11   0   6   22.20    0.80
 -11   0   6   24.10    0.80
 -11   0   6   24.70    0.80
  10   0  -6  444.46   13.10
  10   0  -6  418.66   13.30
 -10   0   6  444.66   13.20
  10   0  -6  484.35   13.40
   9   0  -6    7.40    0.40
   9   0  -6    7.60    0.40
   9   0  -6    7.10    0.30
   8   0  -6    1.60    0.20
   8   0  -6    1.70    0.20
  -7   0   6 5305.37  152.98
   7   0  -6 5323.07  153.08
   7   0  -6 4976.10  152.88
   6   0  -6 1385.76   46.80
  -6   0   6 1412.46   41.40
   5   0  -6    5.10    0.30
  -5   0   6    5.30    0.30
   4   0  -6    5.40    0.30
  -4   0   6    6.00    0.30
   4   0  -6    6.80    0.30
   3   0  -6   22.30    0.70
  -3   0   6   19.90    0.70
   3   0  -6   21.70    0.70
   2   0  -6  383.06   11.20
  -2   0   6  380.26   11.30
  -1   0   6  314.77    8.90
  -1   0   6  287.77    8.90
   1   0  -6  292.77    8.90
   0   0   6  237.48    7.10
   1   0   6  194.08    5.80
   2   0   6   70.99    2.20
   3   0   6   42.50    1.40
   4   0   6   21.80    0.80
  -5   0  -6  117.09    3.60
   5   0   6  125.39    3.80
  -6   0  -6  248.88    7.90
   6   0   6  272.17    7.90
  -6   0  -6  265.17    7.90
   6   0   6  280.87    8.10
  -7   0  -6   97.99    3.10
  -7   0  -6  102.69    3.10
   7   0   6  108.09    3.10
   7   0   6   99.69    3.30
  -8   0  -6   35.50    1.10
   8   0   6   36.50    1.10
  -8   0  -6   35.00    1.10
  -9   0  -6    1.70    0.20
   9   0   6    1.70    0.20
 -10   0  -6    6.70    0.30
  10   0   6    6.20    0.30
  11   0   6   81.59    2.50
 -11   0  -6   87.59    2.60
 -12   0  -6   13.40    0.50
 -13   0  -6    0.10    0.10
  18  -1  -6    4.70    0.20
 -18  -1   6    4.60    0.20
  18   1  -6    4.90    0.20
 -17  -1   6    7.10    0.30
  17  -1  -6    6.70    0.30
  17  -1  -6    7.10    0.30
  17  -1  -6    6.90    0.30
 -17   1   6    6.80    0.30
  17   1  -6    7.40    0.30
 -17   1   6    6.80    0.30
 -17   1   6    6.80    0.30
  16  -1  -6    6.00    0.30
  16  -1  -6    6.20    0.30
  16  -1  -6    6.40    0.30
 -16  -1   6    6.40    0.30
 -16  -1   6    6.00    0.30
 -16   1   6    5.60    0.30
 -16   1   6    6.50    0.30
  16   1  -6    5.80    0.30
 -16   1   6    6.10    0.30
 -16   1   6    6.30    0.30
 -16   1   6    6.10    0.30
  16   1  -6    6.30    0.30
  15  -1  -6   12.40    0.50
  15  -1  -6   11.70    0.50
 -15  -1   6   11.40    0.50
 -15  -1   6   11.20    0.50
  15  -1  -6   12.40    0.40
 -15   1   6   13.10    0.50
 -15   1   6   11.90    0.50
 -15   1   6   12.00    0.50
  15   1  -6   12.00    0.50
 -15   1   6   11.10    0.50
 -15   1   6   12.20    0.50
 -14  -1   6   57.69    1.80
 -14  -1   6   56.29    1.80
  14  -1  -6   55.39    1.80
  14  -1  -6   60.59    1.80
 -14   1   6   56.29    1.80
 -14   1   6   57.29    1.80
 -14   1   6   57.59    1.80
  14   1  -6   57.29    1.70
  14   1  -6   58.19    1.80
 -14   1   6   58.59    1.80
 -14   1   6   53.79    1.80
  14   1  -6   57.59    1.90
 -13  -1   6   11.20    0.50
  13  -1  -6   11.90    0.40
  13  -1  -6   11.20    0.50
 -13  -1   6   12.30    0.50
 -13   1   6   11.20    0.40
  13   1  -6   11.80    0.50
 -13   1   6   11.60    0.40
  13   1  -6   12.10    0.40
 -13   1   6   11.30    0.50
 -13   1   6   11.70    0.40
 -13   1   6   11.90    0.50
 -13   1   6   11.40    0.50
 -12  -1   6    2.10    0.20
 -12  -1   6    2.30    0.20
  12  -1  -6    2.20    0.20
 -12  -1   6    2.40    0.20
  12  -1  -6    1.80    0.30
 -12  -1   6    2.30    0.20
  12  -1  -6    2.50    0.20
 -12   1   6    2.40    0.20
  12   1  -6    2.00    0.20
 -12   1   6    2.20    0.20
  12   1  -6    2.30    0.20
 -12   1   6    2.30    0.20
  12   1  -6    2.50    0.40
 -12   1   6    2.50    0.20
 -12   1   6    2.50    0.20
 -11  -1   6   11.00    0.40
 -11  -1   6   10.90    0.40
 -11  -1   6   10.80    0.40
 -11  -1   6   10.90    0.40
  11  -1  -6   10.30    0.60
  11   1  -6   11.00    0.60
  11   1  -6   11.30    0.40
 -11   1   6   10.50    0.40
 -11   1   6   10.90    0.40
  11   1  -6   10.70    0.40
 -11   1   6   10.60    0.40
 -11   1   6   10.80    0.40
 -11   1   6   12.40    0.40
 -11   1   6   10.80    0.40
 -10  -1   6  491.55   14.40
  10  -1  -6  498.65   14.60
 -10  -1   6  494.95   14.40
 -10  -1   6  510.05   14.40
 -10  -1   6  527.75   14.40
 -10  -1   6  483.75   14.40
 -10   1   6  494.85   14.40
 -10   1   6  480.35   14.40
  10   1  -6  514.45   14.60
 -10   1   6  473.75   14.40
  10   1  -6  447.96   14.60
  10   1  -6  514.05   14.40
  10   1  -6  454.15   14.40
 -10   1   6  489.55   14.40
 -10   1   6  461.15   14.40
   9  -1  -6    2.90    0.20
   9  -1  -6    3.00    0.30
   9   1  -6    3.20    0.30
   9   1  -6    2.90    0.20
   9   1  -6    3.00    0.30
   8  -1  -6    5.90    0.30
   8  -1  -6    6.30    0.40
   8   1  -6    6.00    0.40
   8   1  -6    5.70    0.20
   7  -1  -6    4.00    0.30
  -7  -1   6    4.10    0.30
   7  -1  -6    3.80    0.20
   7   1  -6    4.00    0.30
   7   1  -6    3.80    0.30
  -7   1   6    4.00    0.30
   6  -1  -6  225.28    6.60
   6  -1  -6  224.28    6.70
  -6  -1   6  231.98    6.70
   6   1  -6  227.88    6.70
   6   1  -6  220.48    6.80
  -6   1   6  220.88    6.70
   5  -1  -6  340.77   10.10
  -5  -1   6  345.17   10.20
  -5   1   6  340.87   10.20
   5   1  -6  346.17   10.20
   4  -1  -6   33.90    1.10
  -4  -1   6   36.30    1.20
   4   1  -6   35.80    1.20
  -4   1   6   37.20    1.20
   3  -1  -6  161.48    5.00
  -3  -1   6  170.18    5.00
   3   1  -6  179.38    5.10
  -3   1   6  163.98    5.00
  -2  -1   6   99.89    3.00
   2  -1  -6   96.79    3.00
  -2   1   6  102.29    3.00
  -1  -1   6  242.38    7.00
   1  -1  -6  231.78    7.00
  -1   1   6  235.68    7.00
   0  -1   6    8.70    0.40
   0   1   6    8.60    0.40
   1  -1   6  343.87   10.40
   1   1   6  355.86   10.40
   2  -1   6  132.89    4.00
   2   1   6  127.39    4.00
   3  -1   6    2.70    0.30
   3   1   6    2.20    0.30
   4  -1   6  114.99    3.50
  -4  -1  -6  108.19    3.30
   4   1   6  114.09    3.50
  -5  -1  -6  507.45   15.50
   5  -1   6  539.65   15.70
  -5  -1  -6  492.85   15.50
   5   1   6  566.84   15.70
   5   1   6  532.65   15.50
  -6  -1  -6    8.10    0.30
  -6  -1  -6    8.30    0.30
   6  -1   6    8.20    0.50
  -6   1  -6    7.70    0.30
   6   1   6    8.60    0.40
   6   1   6    8.20    0.30
   6   1   6    8.40    0.50
  -6   1  -6    7.80    0.30
  -7  -1  -6   32.60    1.10
   7  -1   6   30.50    1.20
   7   1   6   31.80    1.20
  -7   1  -6   32.70    1.00
  -7   1  -6   33.20    1.00
   7   1   6   32.20    1.00
  -8  -1  -6   31.10    1.00
  -8   1  -6   32.80    1.00
   8   1   6   31.40    1.00
  -8   1  -6   31.00    1.00
  -9  -1  -6    0.00    0.10
   9   1   6    0.10    0.10
  -9   1  -6    0.20    0.10
  -9   1  -6    0.10    0.10
 -10  -1  -6    1.30    0.10
  10   1   6    1.50    0.20
 -10   1  -6    1.50    0.10
 -11  -1  -6    0.20    0.10
  11   1   6    0.20    0.10
 -11   1  -6    0.20    0.10
 -12  -1  -6   23.70    0.80
  12   1   6   22.60    0.70
 -12   1  -6   22.30    0.70
 -13  -1  -6  182.68    5.40
 -17  -2   6    3.40    0.20
  17  -2  -6    3.60    0.20
 -17   2   6    3.30    0.20
 -17   2   6    3.50    0.20
 -17   2   6    3.40    0.20
  17   2  -6    3.70    0.20
 -17   2   6    3.80    0.20
  16  -2  -6    8.90    0.40
  16  -2  -6    9.00    0.30
 -16  -2   6    8.90    0.40
  16  -2  -6    8.10    0.30
 -16   2   6    8.80    0.30
 -16   2   6    9.20    0.40
 -16   2   6    8.60    0.40
 -16   2   6    8.90    0.30
  16   2  -6    9.10    0.30
  15  -2  -6    0.10    0.10
  15  -2  -6    0.10    0.10
 -15  -2   6    0.20    0.10
 -15   2   6    0.10    0.10
 -15   2   6    0.10    0.10
 -15   2   6    0.20    0.10
  15   2  -6    0.10    0.10
 -15   2   6    0.10    0.10
  15   2  -6    0.10    0.10
 -15   2   6    0.10    0.10
 -14  -2   6    0.40    0.10
  14  -2  -6    0.40    0.10
 -14  -2   6    0.70    0.10
  14  -2  -6    0.50    0.10
 -14   2   6    0.40    0.10
 -14   2   6    0.30    0.10
 -14   2   6    0.30    0.10
 -14   2   6    0.30    0.10
 -14   2   6    0.50    0.10
  14   2  -6    0.30    0.10
 -13  -2   6   39.00    1.30
 -13  -2   6   42.80    1.30
  13  -2  -6   41.00    1.30
 -13   2   6   41.00    1.30
 -13   2   6   40.70    1.30
 -13   2   6   42.90    1.30
 -13   2   6   41.20    1.30
 -13   2   6   41.50    1.30
  13   2  -6   39.60    1.30
  13   2  -6   41.60    1.30
  12  -2  -6    6.90    0.30
 -12  -2   6    6.20    0.30
 -12  -2   6    6.00    0.30
 -12   2   6    6.50    0.30
  12   2  -6    6.40    0.30
 -12   2   6    6.70    0.30
 -12   2   6    6.30    0.30
 -12   2   6    7.40    0.30
 -12   2   6    6.30    0.30
  12   2  -6    6.40    0.30
  11  -2  -6   56.49    2.10
 -11  -2   6   62.69    1.90
 -11  -2   6   62.29    1.90
 -11   2   6   65.29    1.90
 -11   2   6   64.29    1.90
 -11   2   6   62.19    1.90
  11   2  -6   66.19    1.90
 -11   2   6   62.39    1.90
  11   2  -6   61.59    1.90
 -11   2   6   60.29    1.90
  11   2  -6   61.69    1.90
 -10  -2   6   14.50    0.50
 -10  -2   6   13.90    0.50
  10  -2  -6   13.70    0.70
  10   2  -6   15.00    0.50
 -10   2   6   13.50    0.50
  10   2  -6   14.70    0.50
 -10   2   6   14.20    0.50
 -10   2   6   14.20    0.50
  10   2  -6   13.00    0.50
 -10   2   6   14.00    0.50
   9  -2  -6   91.29    2.90
  -9  -2   6   91.19    2.70
  -9  -2   6   94.89    2.80
   9   2  -6   90.09    2.70
  -9   2   6   89.59    2.70
  -9   2   6   95.39    2.80
   9   2  -6   85.69    2.70
   9   2  -6   90.99    2.80
  -9   2   6   92.29    2.70
  -9   2   6   88.49    2.70
  -9   2   6   90.49    2.70
   8  -2  -6    0.10    0.10
   8  -2  -6    0.00    0.10
  -8   2   6    0.00    0.10
   8   2  -6    0.20    0.10
   8   2  -6    0.00    0.10
   7  -2  -6  193.48    5.50
   7   2  -6  180.38    5.60
   7   2  -6  184.28    5.30
   7   2  -6  165.48    5.40
   6  -2  -6   16.90    0.60
   6   2  -6   17.40    0.70
   6   2  -6   16.50    0.60
   5  -2  -6   33.40    1.10
  -5  -2   6   31.80    1.10
   5   2  -6   32.10    1.10
  -5   2   6   32.50    1.10
   5   2  -6   32.00    1.20
  -4  -2   6   81.19    2.50
   4   2  -6   80.49    2.60
  -3  -2   6 1032.80   29.80
   3   2  -6 1035.20   29.90
  -3   2   6  981.30   29.80
  -2  -2   6  254.87    7.40
   2  -2  -6  255.57    7.40
  -2   2   6  239.68    7.40
  -1  -2   6   44.20    1.40
  -1   2   6   44.40    1.40
   0  -2   6    0.10    0.10
   0   2   6    0.00    0.10
   1  -2   6 1205.28   34.10
   1   2   6 1116.49   34.10
   2  -2   6  142.09    4.20
  -2  -2  -6  134.89    4.10
   2   2   6  142.19    4.20
   3  -2   6  158.88    4.90
  -3  -2  -6  158.08    4.70
   3   2   6  163.88    4.90
  -4  -2  -6   80.29    2.30
   4  -2   6   84.19    2.50
  -4  -2  -6   77.69    2.40
   4  -2   6   74.29    2.30
  -4   2  -6   76.39    2.40
   4   2   6   73.49    2.30
   4   2   6   78.09    2.50
  -4   2  -6   76.29    2.30
   4   2   6   78.69    2.40
   4   2   6   78.19    2.40
   4   2   6   79.59    2.40
  -5  -2  -6   93.39    2.80
   5  -2   6   89.39    2.90
  -5  -2  -6   93.69    2.80
   5  -2   6   90.69    2.80
  -5   2  -6   90.69    2.80
  -5   2  -6   94.09    2.80
   5   2   6  100.49    2.80
   5   2   6   89.09    2.90
   5   2   6   91.09    2.80
   5   2   6   91.19    2.80
   5   2   6   93.49    2.80
   6  -2   6   30.70    1.00
   6  -2   6   29.10    1.30
  -6  -2  -6   33.60    1.00
  -6  -2  -6   32.70    1.00
  -6   2  -6   32.50    1.00
   6   2   6   32.60    1.00
  -6   2  -6   32.50    1.00
  -7  -2  -6    3.00    0.20
  -7  -2  -6    3.00    0.20
   7   2   6    3.10    0.20
  -7   2  -6    3.20    0.20
  -7   2  -6    2.90    0.20
  -8  -2  -6    0.30    0.10
   8   2   6    0.20    0.10
  -8   2  -6    0.30    0.10
  -8   2  -6    0.20    0.10
  -9  -2  -6   17.30    0.60
  -9   2  -6   17.60    0.60
  -9   2  -6   16.80    0.60
   9   2   6   17.30    0.60
 -10  -2  -6   23.30    0.80
 -10   2  -6   22.50    0.80
 -10   2  -6   22.70    0.70
  10   2   6   21.90    0.70
 -11  -2  -6    0.20    0.10
 -11   2  -6    0.20    0.10
  11   2   6    0.50    0.10
 -11   2  -6    0.10    0.10
 -12  -2  -6   19.30    0.60
  12   2   6   17.60    0.60
 -12   2  -6   18.50    0.60
 -12   2  -6   17.40    0.60
 -16   3   6    3.10    0.20
 -16   3   6    3.20    0.20
 -16   3   6    3.30    0.20
  16   3  -6    3.30    0.20
 -16   3   6    3.10    0.20
 -15  -3   6    3.50    0.20
  15  -3  -6    3.70    0.20
  15  -3  -6    3.90    0.20
 -15   3   6    3.80    0.20
 -15   3   6    3.60    0.20
 -15   3   6    4.30    0.20
 -15   3   6    3.90    0.20
  15   3  -6    4.00    0.20
 -15   3   6    3.50    0.20
 -14  -3   6   28.90    0.90
  14  -3  -6   29.30    0.90
  14   3  -6   30.60    0.90
 -14   3   6   29.10    0.90
 -14   3   6   28.10    0.90
 -14   3   6   29.80    0.90
  14   3  -6   26.30    0.90
 -14   3   6   29.60    1.00
 -14   3   6   29.40    0.90
 -13  -3   6   29.50    1.00
  13  -3  -6   29.10    0.90
 -13   3   6   30.80    1.00
  13   3  -6   28.80    1.00
 -13   3   6   30.40    1.00
  13   3  -6   30.90    1.00
 -13   3   6   29.10    1.00
 -13   3   6   31.20    1.00
 -13   3   6   30.20    1.00
 -12  -3   6  195.58    5.80
  12  -3  -6  196.48    5.80
 -12   3   6  201.28    5.80
 -12   3   6  193.48    5.80
  12   3  -6  193.78    5.80
 -12   3   6  200.78    5.90
  12   3  -6  193.88    5.80
 -12   3   6  196.18    5.80
 -12   3   6  195.78    5.80
 -11   3   6  298.47    8.80
 -11   3   6  307.87    8.80
 -11   3   6  307.47    8.80
  11   3  -6  296.37    8.80
 -11   3   6  291.97    8.80
 -11   3   6  295.87    8.80
  11   3  -6  289.47    8.80
 -10   3   6  673.83   19.20
  10   3  -6  627.94   19.20
 -10   3   6  659.33   19.20
 -10   3   6  642.94   19.20
 -10   3   6  654.13   19.20
  10   3  -6  654.03   19.30
 -10   3   6  675.03   19.30
   9   3  -6   45.50    1.50
  -9   3   6   50.69    1.40
  -9   3   6   45.20    1.40
  -9   3   6   46.10    1.40
  -9   3   6   44.90    1.40
   9   3  -6   42.70    1.40
  -9   3   6   44.60    1.40
  -8   3   6   12.80    0.50
  -8   3   6   13.10    0.50
   8   3  -6   12.50    0.50
  -8   3   6   12.60    0.50
   8   3  -6   11.80    0.50
  -8   3   6   14.30    0.50
  -7  -3   6    0.90    0.10
  -7   3   6    0.80    0.10
   7   3  -6    0.70    0.10
   7   3  -6    0.70    0.10
  -7   3   6    0.70    0.10
  -7   3   6    0.60    0.10
  -6  -3   6    2.20    0.20
  -6   3   6    2.50    0.20
  -6   3   6    2.20    0.20
   6   3  -6    2.30    0.20
  -6   3   6    2.40    0.20
  -5  -3   6    0.00    0.10
   5   3  -6    0.10    0.10
  -5   3   6    0.10    0.10
  -4  -3   6   36.20    1.20
   4   3  -6   36.40    1.20
  -4   3   6   37.80    1.10
   3  -3  -6  170.98    5.10
  -3   3   6  172.08    5.10
   2  -3  -6   24.60    0.80
  -2   3   6   24.70    0.80
  -1  -3   6   40.60    1.30
   1  -3  -6   43.60    1.40
  -1   3   6   40.90    1.40
   1   3  -6   43.20    1.30
  -1   3   6   43.50    1.30
  -1   3   6   42.70    1.30
   0  -3   6   15.40    0.50
   0  -3   6   16.10    0.60
   0   3  -6   14.60    0.50
   0   3   6   15.70    0.60
   0   3   6   15.70    0.50
   0   3   6   15.00    0.50
  -1  -3  -6  103.39    3.10
   1  -3   6  107.29    3.10
   1  -3   6  104.39    3.10
   1   3   6  102.29    3.10
  -1   3  -6  100.29    3.10
   1   3   6  100.29    3.10
  -1   3  -6  106.49    3.10
  -1   3  -6   97.49    3.10
   1   3   6  107.49    3.10
   2  -3   6    4.00    0.20
  -2  -3  -6    4.10    0.20
   2  -3   6    4.20    0.20
   2   3   6    4.60    0.30
  -2   3  -6    4.10    0.20
  -2   3  -6    4.00    0.20
   2   3   6    4.00    0.20
   2   3   6    4.50    0.20
  -2   3  -6    4.00    0.20
  -3  -3  -6    0.60    0.10
   3   3   6    0.40    0.10
  -3   3  -6    0.70    0.10
   3   3   6    0.40    0.10
  -3   3  -6    0.70    0.10
   3   3   6    0.50    0.10
  -3   3  -6    0.50    0.10
   4  -3   6    8.80    0.40
  -4  -3  -6    9.30    0.40
  -4  -3  -6    9.20    0.30
  -4   3  -6    8.80    0.40
  -4   3  -6    8.40    0.40
   4   3   6    9.00    0.40
  -4   3  -6    9.10    0.40
   4   3   6    8.30    0.30
   4   3   6    8.90    0.40
  -5  -3  -6  121.99    3.50
  -5  -3  -6  117.19    3.50
   5  -3   6  114.19    3.50
   5   3   6  120.49    3.50
  -5   3  -6  111.59    3.50
  -5   3  -6  116.19    3.50
   5   3   6  116.69    3.50
   5   3   6  109.89    3.50
   6  -3   6    0.20    0.10
  -6  -3  -6    0.10    0.10
  -6  -3  -6    0.20    0.10
   6   3   6    0.10    0.10
   6   3   6    0.20    0.10
   6   3   6    0.10    0.10
  -6   3  -6    0.40    0.10
  -6   3  -6    0.10    0.10
  -7  -3  -6    0.10    0.10
  -7  -3  -6    0.10    0.10
  -7   3  -6    0.10    0.10
   7   3   6    0.20    0.10
  -7   3  -6    0.10    0.10
  -8  -3  -6   59.09    1.80
  -8   3  -6   59.89    1.80
  -8   3  -6   61.09    1.80
   8   3   6   58.39    1.80
  -9  -3  -6   64.29    2.00
  -9   3  -6   63.49    2.00
   9   3   6   63.49    2.00
  -9   3  -6   64.99    2.00
 -10  -3  -6   73.69    2.20
 -10   3  -6   74.39    2.20
 -10   3  -6   73.09    2.20
  10   3   6   69.89    2.20
 -11  -3  -6   35.50    1.10
 -11   3  -6   34.80    1.10
  11   3   6   33.70    1.10
 -11   3  -6   34.20    1.10
  14  -4  -6    1.40    0.10
 -14   4   6    1.30    0.10
 -14   4   6    1.40    0.10
 -14   4   6    1.40    0.10
  14   4  -6    1.50    0.10
 -14   4   6    1.50    0.10
  13  -4  -6   11.40    0.40
  13   4  -6   11.50    0.40
 -13   4   6   11.70    0.40
 -13   4   6   11.70    0.40
 -13   4   6   11.20    0.40
 -13   4   6   11.60    0.40
  12  -4  -6   14.20    0.50
 -12   4   6   14.50    0.50
 -12   4   6   14.50    0.50
  12   4  -6   14.90    0.50
  12   4  -6   13.60    0.50
 -12   4   6   14.00    0.50
 -12   4   6   14.70    0.50
  11  -4  -6    7.50    0.30
 -11   4   6    7.20    0.30
 -11   4   6    8.70    0.30
 -11   4   6    7.60    0.30
 -11   4   6    7.50    0.30
  11   4  -6    6.90    0.30
  11   4  -6    7.30    0.30
  10   4  -6   40.50    1.30
 -10   4   6   41.20    1.30
 -10   4   6   42.40    1.30
  10   4  -6   37.90    1.30
 -10   4   6   41.20    1.30
   9   4  -6    0.40    0.10
  -9   4   6    0.50    0.10
   9   4  -6    0.50    0.10
  -9   4   6    0.50    0.10
  -9   4   6    0.90    0.10
  -8  -4   6   39.70    1.30
   8   4  -6   41.30    1.30
   8   4  -6   38.80    1.30
  -8   4   6   41.00    1.30
  -8   4   6   41.00    1.30
  -8   4   6   40.60    1.30
  -7  -4   6  194.58    5.70
   7   4  -6  188.78    5.70
  -7   4   6  192.28    5.70
  -7   4   6  195.08    5.70
  -7   4   6  195.08    5.70
   7   4  -6  187.78    5.70
  -6  -4   6    4.20    0.30
  -6   4   6    4.20    0.20
   6   4  -6    4.00    0.30
  -6   4   6    3.90    0.20
  -6   4   6    4.30    0.20
  -6   4   6    3.90    0.20
   6   4  -6    3.90    0.20
  -5  -4   6   12.90    0.50
  -5  -4   6   11.90    0.40
   5   4  -6   12.40    0.50
  -5   4   6   12.70    0.50
   5   4  -6   11.20    0.40
  -5   4   6   12.60    0.50
  -5   4   6   11.90    0.40
  -4  -4   6   38.70    1.20
  -4  -4   6   38.70    1.30
   4   4  -6   36.50    1.20
  -4   4   6   38.70    1.20
  -4   4   6   39.30    1.20
  -4   4   6   39.40    1.20
   4   4  -6   39.10    1.30
  -4   4   6   41.40    1.20
  -3  -4   6   33.80    1.10
  -3  -4   6   34.00    1.10
   3   4  -6   33.20    1.10
  -3   4   6   35.40    1.10
   3   4  -6   34.10    1.10
  -3   4   6   34.50    1.10
  -3   4   6   35.90    1.10
  -3   4   6   34.30    1.10
  -2  -4   6    7.50    0.40
  -2   4   6    8.60    0.40
  -2   4   6    7.70    0.30
  -2   4   6    7.70    0.30
  -2   4   6    7.80    0.30
   2   4  -6    7.90    0.30
  -1  -4   6   13.50    0.50
  -1  -4   6   14.00    0.50
   1  -4  -6   13.20    0.50
  -1   4   6   13.80    0.50
   1   4  -6   14.30    0.50
  -1   4   6   13.80    0.50
  -1   4   6   14.40    0.50
  -1   4   6   13.70    0.50
   0  -4   6   35.60    1.20
   0  -4   6   36.60    1.20
   0  -4  -6   36.40    1.10
   0   4   6   37.40    1.20
   0   4  -6   37.10    1.20
   0   4   6   38.50    1.20
   0   4  -6   34.60    1.10
   0   4   6   35.10    1.10
   0   4   6   37.50    1.20
   1  -4   6   82.49    2.40
  -1  -4  -6   80.09    2.40
   1  -4   6   77.89    2.40
   1   4   6   74.99    2.40
  -1   4  -6   76.89    2.40
   1   4   6   80.89    2.40
   1   4   6   77.09    2.40
  -1   4  -6   76.79    2.40
   2  -4   6   12.30    0.50
   2  -4   6   13.40    0.50
  -2  -4  -6   13.70    0.50
   2   4   6   14.10    0.50
  -2   4  -6   13.70    0.50
  -2   4  -6   15.80    0.50
   2   4   6   14.70    0.60
   2   4   6   14.10    0.50
   2   4   6   14.00    0.50
  -3  -4  -6   22.00    0.70
   3  -4   6   22.60    0.70
   3   4   6   21.90    0.70
  -3   4  -6   22.10    0.80
   3   4   6   22.00    0.80
  -3   4  -6   22.00    0.80
   3   4   6   23.00    0.80
   3   4   6   23.60    0.80
   4  -4   6   27.20    0.90
  -4  -4  -6   26.00    0.80
  -4   4  -6   25.40    0.90
  -4   4  -6   25.00    0.90
   4   4   6   27.80    0.90
   4   4   6   25.30    0.90
  -4   4  -6   26.60    0.90
   4   4   6   25.80    0.80
   4   4   6   26.30    0.90
  -5  -4  -6    4.40    0.20
   5  -4   6    4.10    0.20
  -5   4  -6    4.40    0.20
   5   4   6    4.30    0.20
   5   4   6    4.50    0.20
  -5   4  -6    4.20    0.20
   5   4   6    4.40    0.30
   6  -4   6   74.89    2.30
  -6  -4  -6   72.39    2.30
   6   4   6   75.19    2.30
  -6   4  -6   73.59    2.30
   6   4   6   72.79    2.20
  -6   4  -6   79.79    2.30
  -6   4  -6   74.09    2.30
   6   4   6   76.69    2.30
  -7  -4  -6    0.90    0.10
   7   4   6    0.90    0.10
  -7   4  -6    1.00    0.10
  -7   4  -6    0.90    0.10
  -8   4  -6   18.20    0.60
   8   4   6   18.10    0.60
  -8   4  -6   18.50    0.60
  -9   4  -6   26.00    0.80
  -9   4  -6   26.20    0.80
   9   4   6   24.30    0.80
 -10   4  -6    0.10    0.10
 -11   5   6    6.40    0.20
 -11   5   6    6.20    0.30
 -11   5   6    6.30    0.30
  11   5  -6    6.20    0.20
  10  -5  -6    0.30    0.10
 -10   5   6    0.30    0.10
  10   5  -6    0.30    0.10
  10   5  -6    0.30    0.10
 -10   5   6    0.50    0.10
 -10   5   6    0.60    0.10
   9  -5  -6   61.19    1.80
  -9  -5   6   57.39    1.90
   9   5  -6   62.39    1.90
  -9   5   6   63.39    1.90
   9   5  -6   61.39    1.90
  -9   5   6   60.39    1.90
  -9   5   6   62.59    1.90
  -8  -5   6    2.00    0.20
   8  -5  -6    1.90    0.10
  -8   5   6    1.90    0.20
   8   5  -6    1.80    0.20
   8   5  -6    2.00    0.20
  -8   5   6    2.10    0.20
  -8   5   6    2.00    0.20
   7  -5  -6    1.00    0.10
  -7  -5   6    0.90    0.10
  -7   5   6    0.80    0.10
   7   5  -6    0.80    0.10
  -7   5   6    0.80    0.10
  -7   5   6    0.80    0.10
   7   5  -6    0.90    0.10
  -6  -5   6   12.90    0.50
   6  -5  -6   12.20    0.40
   6   5  -6   12.20    0.50
  -6   5   6   11.80    0.40
  -6   5   6   12.70    0.50
  -6   5   6   12.30    0.40
  -5  -5   6   47.20    1.50
   5  -5  -6   48.50    1.50
  -5  -5   6   50.99    1.60
  -5   5   6   49.10    1.50
  -5   5   6   49.10    1.50
   5   5  -6   48.70    1.50
  -5   5   6   49.40    1.50
  -4  -5   6    0.10    0.10
  -4  -5   6    0.10    0.10
   4  -5  -6    0.10    0.10
   4   5  -6    0.00    0.10
  -4   5   6    0.00    0.10
  -4   5   6    0.00    0.10
  -4   5   6    0.00    0.10
  -4   5   6    0.10    0.10
  -3  -5   6    1.80    0.20
   3  -5  -6    2.00    0.10
  -3  -5   6    2.10    0.20
  -3   5   6    2.00    0.20
  -3   5   6    1.60    0.20
   3   5  -6    1.80    0.20
  -3   5   6    1.80    0.20
  -3   5   6    1.80    0.20
  -2  -5   6    3.00    0.20
  -2  -5   6    2.60    0.20
   2  -5  -6    2.60    0.10
  -2   5   6    2.40    0.20
  -2   5   6    2.60    0.20
  -2   5   6    3.20    0.20
   2   5  -6    2.80    0.20
  -2   5   6    3.00    0.20
  -1  -5   6  359.56   10.50
  -1  -5   6  359.46   10.60
   1  -5  -6  355.46   10.50
  -1   5   6  352.66   10.50
  -1   5   6  357.86   10.50
  -1   5   6  350.96   10.50
   1   5  -6  364.96   10.50
  -1   5   6  353.66   10.50
   0  -5   6    4.00    0.20
   0  -5   6    4.50    0.30
   0  -5  -6    3.80    0.20
   0   5  -6    4.30    0.20
   0   5   6    3.50    0.20
   0   5   6    3.90    0.30
   0   5   6    4.30    0.20
   0   5   6    3.90    0.20
   1  -5   6  128.89    4.10
   1  -5   6  139.59    4.00
  -1  -5  -6  134.89    4.00
   1   5   6  135.19    4.10
   1   5   6  132.09    4.00
   1   5   6  135.19    4.00
   1   5   6  137.19    4.10
  -1   5  -6  141.79    4.10
  -2  -5  -6    0.20    0.10
   2  -5   6    0.30    0.10
   2  -5   6    0.20    0.10
  -2   5  -6    0.50    0.10
   2   5   6    0.30    0.10
   2   5   6    0.30    0.10
   2   5   6    0.20    0.10
  -3  -5  -6    0.00    0.10
   3  -5   6    0.10    0.10
  -3   5  -6    0.00    0.10
   3   5   6    0.20    0.10
   3   5   6    0.00    0.10
   3   5   6    0.10    0.10
   3   5   6    0.10    0.10
   4  -5   6    1.80    0.20
  -4  -5  -6    1.90    0.10
   4   5   6    1.70    0.10
   4   5   6    1.70    0.20
  -4   5  -6    1.70    0.20
   4   5   6    2.00    0.20
   4   5   6    1.70    0.10
  -4   5  -6    1.70    0.10
  -5  -5  -6    0.50    0.10
   5  -5   6    0.60    0.10
  -5   5  -6    0.50    0.10
   5   5   6    0.80    0.10
   5   5   6    0.70    0.10
  -5   5  -6    0.70    0.10
   5   5   6    0.60    0.10
   6  -5   6   16.00    0.50
  -6   5  -6   15.40    0.50
  -6   5  -6   15.90    0.50
   6   5   6   15.50    0.50
   6   5   6   16.90    0.50
  -6  -6   6    0.40    0.10
  -6   6   6    0.60    0.10
   6   6  -6    0.40    0.10
   5  -6  -6   15.60    0.50
  -5  -6   6   16.50    0.50
  -5   6   6   16.20    0.50
  -5   6   6   16.00    0.50
   5   6  -6   15.00    0.50
  -5   6   6   15.20    0.50
  -4  -6   6    3.10    0.20
  -4  -6   6    3.00    0.20
  -4   6   6    3.30    0.20
  -4   6   6    3.00    0.20
   4   6  -6    3.00    0.20
  -4   6   6    3.10    0.20
   3  -6  -6   61.29    2.00
   3  -6  -6   65.89    1.90
  -3  -6   6   67.69    2.00
  -3  -6   6   65.59    1.90
  -3   6   6   66.69    2.00
  -3   6   6   68.29    2.00
   3   6  -6   65.69    2.00
  -3   6   6   58.09    2.00
  -3   6   6   67.39    1.90
  -2  -6   6   80.59    2.40
   2  -6  -6   82.09    2.40
  -2  -6   6   81.39    2.40
   2  -6  -6   79.79    2.40
  -2   6   6   77.19    2.40
   2   6  -6   79.29    2.40
  -2   6   6   81.99    2.40
  -2   6   6   82.99    2.40
  -2   6   6   80.39    2.40
  -1  -6   6   11.50    0.40
  -1  -6   6   12.10    0.40
   1  -6  -6   12.00    0.40
   1  -6  -6   11.60    0.40
  -1   6   6   11.60    0.40
  -1   6   6   11.50    0.40
  -1   6   6   11.20    0.40
  -1   6   6   12.60    0.40
   1   6  -6   11.70    0.40
   0  -6   6   11.60    0.40
   0  -6  -6   11.70    0.40
   0  -6   6   10.80    0.40
   0   6  -6   11.20    0.40
   0   6   6   11.00    0.40
   0   6   6   11.40    0.40
   0   6   6   11.80    0.40
   0   6   6   11.10    0.40
  -1  -6  -6  115.89    3.30
   1  -6   6  115.79    3.30
   1   6   6  109.59    3.30
   1   6   6  114.39    3.30
  -1   6  -6  113.89    3.30
   1   6   6   98.99    3.40
   1   6   6  112.99    3.30
  -2  -6  -6   38.30    1.20
   2   6   6   39.20    1.20
  -2   6  -6   38.20    1.20
   2   6   6   38.10    1.20
  18   0  -7    0.00    0.10
 -18   0   7    0.10    0.10
  17   0  -7    0.10    0.10
 -17   0   7    0.10    0.10
 -17   0   7   -0.10    0.10
  17   0  -7    0.10    0.10
 -17   0   7    0.00    0.10
  16   0  -7    0.10    0.10
 -16   0   7    0.10    0.10
  16   0  -7    0.00    0.10
 -16   0   7    0.00    0.10
 -16   0   7    0.10    0.10
 -16   0   7    0.00    0.10
 -15   0   7    0.10    0.10
 -15   0   7    0.00    0.10
 -15   0   7    0.20    0.10
 -15   0   7   -0.10    0.10
 -15   0   7    0.00    0.10
  15   0  -7    0.10    0.10
  15   0  -7    0.00    0.10
 -14   0   7    0.10    0.10
 -14   0   7    0.10    0.10
 -14   0   7    0.00    0.10
 -14   0   7    0.20    0.10
 -14   0   7    0.10    0.10
  14   0  -7    0.10    0.10
  14   0  -7    0.20    0.10
 -13   0   7    0.00    0.10
 -13   0   7    0.10    0.10
 -13   0   7   -0.10    0.10
  13   0  -7    0.00    0.10
 -13   0   7    0.00    0.10
  13   0  -7    0.10    0.10
 -13   0   7    0.10    0.10
  12   0  -7    0.00    0.10
  12   0  -7   -0.10    0.20
  12   0  -7    0.00    0.10
 -12   0   7    0.00    0.10
 -12   0   7    0.00    0.10
 -12   0   7    0.00    0.10
 -12   0   7    0.00    0.10
 -12   0   7    0.00    0.10
 -11   0   7    0.00    0.10
 -11   0   7    0.00    0.10
 -11   0   7    0.30    0.10
  11   0  -7    0.20    0.10
 -11   0   7    0.00    0.10
  11   0  -7    0.00    0.20
 -11   0   7    0.10    0.10
  10   0  -7   -0.10    0.10
 -10   0   7    0.10    0.10
 -10   0   7    0.00    0.10
 -10   0   7    0.10    0.10
   9   0  -7   -0.10    0.10
   9   0  -7    0.00    0.10
   9   0  -7    0.30    0.10
   8   0  -7    0.00    0.10
  -8   0   7    0.00    0.10
   7   0  -7    0.00    0.10
  -7   0   7    0.00    0.10
   7   0  -7    0.00    0.10
   6   0  -7    0.10    0.10
  -6   0   7    0.00    0.10
  -5   0   7    0.00    0.10
   5   0  -7   -0.10    0.10
  -3   0   7    0.00    0.10
  -2   0   7    0.00    0.10
  -1   0   7    0.10    0.10
   0   0   7   -0.10    0.10
   1   0   7    2.60    0.30
   2   0   7    0.00    0.10
   3   0   7    0.40    0.20
  -4   0  -7    0.20    0.10
   4   0   7    0.20    0.20
  -5   0  -7   -0.10    0.10
   5   0   7    0.10    0.20
   5   0   7   -0.10    0.10
  -5   0  -7   -0.10    0.10
   5   0   7    0.50    0.10
  -6   0  -7    0.10    0.10
  -6   0  -7    0.00    0.10
   6   0   7    0.00    0.10
  -7   0  -7    0.00    0.10
  -7   0  -7    0.00    0.10
  -8   0  -7    0.00    0.10
  -9   0  -7    0.00    0.10
 -10   0  -7    0.00    0.10
 -11   0  -7   -0.10    0.10
 -12   0  -7    0.10    0.10
  18  -1  -7    2.70    0.20
 -18  -1   7    2.60    0.20
 -18   1   7    2.30    0.10
  18   1  -7    2.80    0.20
  17  -1  -7    0.10    0.10
 -17  -1   7    0.10    0.10
  17  -1  -7    0.10    0.10
 -17  -1   7    0.10    0.10
 -17   1   7    0.20    0.10
 -17   1   7    0.10    0.10
 -17   1   7    0.20    0.10
  17   1  -7    0.20    0.10
  17   1  -7    0.00    0.10
  16  -1  -7    4.70    0.20
  16  -1  -7    5.30    0.20
  16  -1  -7    5.40    0.30
 -16  -1   7    4.80    0.30
 -16  -1   7    5.30    0.30
 -16   1   7    5.10    0.30
  16   1  -7    4.90    0.30
 -16   1   7    5.00    0.20
 -16   1   7    5.60    0.30
  16   1  -7    5.20    0.30
 -16   1   7    4.40    0.20
 -16   1   7    4.90    0.20
 -15  -1   7   87.79    2.70
  15  -1  -7   83.19    2.60
  15  -1  -7   89.29    2.60
 -15  -1   7   87.09    2.70
  15  -1  -7   90.39    2.70
  15   1  -7   88.29    2.60
 -15   1   7   87.49    2.60
 -15   1   7   84.39    2.70
 -15   1   7   88.79    2.70
 -15   1   7   85.69    2.70
  15   1  -7   87.19    2.70
 -15   1   7   89.09    2.60
 -14  -1   7   42.20    1.30
  14  -1  -7   39.40    1.30
  14  -1  -7   42.90    1.30
 -14  -1   7   40.80    1.30
 -14   1   7   40.70    1.30
 -14   1   7   42.30    1.30
 -14   1   7   41.80    1.30
 -14   1   7   41.60    1.30
 -14   1   7   40.50    1.30
  14   1  -7   40.90    1.30
  14   1  -7   40.50    1.30
  13  -1  -7   57.59    1.80
  13  -1  -7   58.49    1.80
 -13  -1   7   58.49    1.90
 -13  -1   7   57.09    1.80
 -13  -1   7   57.29    1.80
 -13  -1   7   61.59    1.90
 -13   1   7   59.09    1.80
 -13   1   7   62.89    1.80
 -13   1   7   60.29    1.90
 -13   1   7   56.99    1.80
  13   1  -7   57.89    1.80
 -13   1   7   56.69    1.80
 -13   1   7   60.89    1.80
  13   1  -7   61.39    1.80
 -12  -1   7    6.20    0.30
 -12  -1   7    6.50    0.30
  12  -1  -7    6.20    0.30
 -12  -1   7    6.50    0.30
  12  -1  -7    7.10    0.30
  12  -1  -7    6.50    0.70
 -12  -1   7    6.00    0.30
 -12   1   7    6.20    0.30
  12   1  -7    7.00    0.30
  12   1  -7    6.00    0.30
 -12   1   7    7.40    0.30
 -12   1   7    6.70    0.30
  12   1  -7    5.40    0.50
 -12   1   7    6.10    0.30
 -12   1   7    6.10    0.30
 -12   1   7    6.20    0.30
 -11  -1   7    7.80    0.30
 -11  -1   7    7.00    0.30
 -11  -1   7    7.00    0.30
  11  -1  -7    6.60    0.30
 -11  -1   7    6.90    0.30
  11  -1  -7    7.00    0.50
 -11   1   7    6.80    0.30
  11   1  -7    6.60    0.30
 -11   1   7    6.90    0.30
 -11   1   7    7.10    0.30
 -11   1   7    6.50    0.30
  11   1  -7    6.70    0.50
  11   1  -7    7.30    0.30
 -11   1   7    6.70    0.30
  10  -1  -7  340.47   10.00
 -10  -1   7  347.37    9.90
 -10  -1   7  338.57    9.80
 -10  -1   7  336.47    9.80
 -10  -1   7  331.77    9.80
 -10   1   7  337.97    9.80
 -10   1   7  338.07    9.80
 -10   1   7  332.67    9.80
  10   1  -7  338.17    9.80
 -10   1   7  337.97    9.80
 -10   1   7  317.97    9.80
  10   1  -7  290.17    9.80
  10   1  -7  347.97   10.00
   9  -1  -7  271.47    7.90
   9  -1  -7  252.17    7.80
   9   1  -7  277.97    7.90
   9   1  -7  264.67    7.70
   9   1  -7  250.17    7.90
   8  -1  -7  227.68    6.70
   8  -1  -7  225.68    6.60
   8   1  -7  215.38    6.70
   8   1  -7  207.88    6.50
   8   1  -7  233.38    6.70
   7  -1  -7  292.27    8.60
   7  -1  -7  282.97    8.50
  -7  -1   7  288.37    8.60
  -7   1   7  292.87    8.60
   7   1  -7  290.07    8.70
   7   1  -7  287.77    8.60
   6  -1  -7  101.99    3.00
  -6  -1   7  102.19    3.10
  -6   1   7  101.59    3.10
   6   1  -7   99.99    3.20
  -5  -1   7  243.78    7.20
   5   1  -7  244.38    7.20
  -5   1   7  235.78    7.20
  -4  -1   7   41.40    1.30
   4  -1  -7   38.40    1.20
   4   1  -7   43.10    1.40
  -4   1   7   41.60    1.30
  -3  -1   7   49.50    1.60
   3  -1  -7   46.70    1.50
  -3   1   7   49.70    1.60
   3   1  -7   49.00    1.60
  -2  -1   7  401.96   12.00
  -2   1   7  406.56   12.00
  -1  -1   7   19.50    0.70
  -1   1   7   19.50    0.70
   0  -1   7   71.49    2.20
   0   1   7   70.39    2.20
   1  -1   7 1756.22   51.39
   1   1   7 1732.93   54.59
   2  -1   7 1526.25   44.60
   2   1   7 1515.25   44.60
   3  -1   7   54.29    1.80
  -3  -1  -7   52.39    1.60
   3   1   7   52.29    1.70
  -4  -1  -7    3.40    0.20
   4  -1   7    3.40    0.30
  -4   1  -7    3.10    0.20
   4   1   7    3.60    0.30
   4   1   7    3.30    0.20
  -5  -1  -7  282.57    8.30
  -5  -1  -7  287.57    8.40
   5  -1   7  272.57    8.30
   5  -1   7  291.97    8.50
   5   1   7  274.87    8.30
  -5   1  -7  279.37    8.30
   5   1   7  291.87    8.30
  -5   1  -7  270.17    8.30
   5   1   7  290.57    8.50
   6  -1   7  151.18    4.80
   6  -1   7  149.19    4.60
  -6  -1  -7  159.98    4.60
  -6  -1  -7  153.08    4.60
  -6   1  -7  157.28    4.60
   6   1   7  158.58    4.60
   6   1   7  148.79    4.80
  -6   1  -7  153.58    4.60
  -7  -1  -7   16.50    0.60
  -7   1  -7   16.30    0.60
  -7   1  -7   15.80    0.60
  -8  -1  -7   51.99    1.60
  -8   1  -7   49.10    1.60
  -8   1  -7   51.09    1.60
   8   1   7   49.90    1.60
  -9  -1  -7    2.60    0.20
   9   1   7    2.70    0.20
  -9   1  -7    2.40    0.20
 -10  -1  -7   11.70    0.50
 -10   1  -7   11.30    0.40
 -11  -1  -7   59.79    1.80
 -11   1  -7   58.59    1.80
 -12  -1  -7    8.40    0.30
 -12   1  -7    7.60    0.30
  17  -2  -7   31.00    0.90
 -17  -2   7   30.20    0.90
 -17   2   7   30.00    0.90
  17   2  -7   31.80    0.90
 -17   2   7   29.60    0.90
 -17   2   7   28.10    0.90
 -17   2   7   30.00    0.90
  16  -2  -7    1.40    0.10
  16  -2  -7    1.20    0.10
  16  -2  -7    1.30    0.10
 -16  -2   7    1.30    0.10
  16   2  -7    1.50    0.20
 -16   2   7    1.40    0.10
 -16   2   7    1.40    0.20
 -16   2   7    1.40    0.20
  16   2  -7    1.20    0.10
 -16   2   7    1.40    0.10
 -15  -2   7    0.20    0.10
  15  -2  -7    0.20    0.10
  15  -2  -7    0.20    0.10
 -15   2   7    0.20    0.10
 -15   2   7    0.20    0.10
 -15   2   7    0.20    0.10
 -15   2   7    0.40    0.10
  15   2  -7    0.20    0.10
 -15   2   7    0.20    0.10
  15   2  -7    0.20    0.10
 -14  -2   7   60.09    1.80
  14  -2  -7   56.99    1.70
 -14  -2   7   54.59    1.80
  14  -2  -7   54.69    1.70
 -14   2   7   55.89    1.80
 -14   2   7   56.69    1.70
 -14   2   7   57.39    1.80
 -14   2   7   56.99    1.70
  14   2  -7   57.09    1.80
  14   2  -7   56.49    1.80
 -14   2   7   53.99    1.70
 -13  -2   7   10.90    0.40
  13  -2  -7   10.90    0.40
 -13  -2   7   10.60    0.40
  13   2  -7   11.30    0.50
 -13   2   7   11.30    0.40
 -13   2   7   11.30    0.50
  13   2  -7   10.90    0.40
 -13   2   7   10.60    0.40
 -13   2   7   11.00    0.40
 -13   2   7   10.50    0.40
  12  -2  -7  121.59    3.80
 -12  -2   7  129.39    3.80
 -12  -2   7  130.99    3.80
 -12   2   7  129.89    3.80
  12   2  -7  124.39    3.80
 -12   2   7  128.99    3.80
 -12   2   7  121.29    3.80
 -12   2   7  122.59    3.80
  12   2  -7  136.49    3.80
 -12   2   7  132.39    3.80
  12   2  -7  121.29    3.80
 -11  -2   7 1664.23   46.80
  11  -2  -7 1426.06   47.00
 -11  -2   7 1630.84   46.80
  11   2  -7 1671.03   46.80
 -11   2   7 1644.34   46.80
  11   2  -7 1530.15   46.80
 -11   2   7 1586.94   46.80
 -11   2   7 1659.53   46.80
  11   2  -7 1599.14   46.80
 -11   2   7 1552.64   46.80
 -11   2   7 1609.34   46.80
 -10  -2   7 1190.68   32.90
 -10  -2   7 1086.29   32.80
  10  -2  -7 1069.99   33.00
 -10   2   7 1156.78   32.90
  10   2  -7 1173.48   32.90
 -10   2   7 1092.89   32.80
  10   2  -7 1154.18   32.80
 -10   2   7 1149.39   32.80
 -10   2   7 1144.39   32.80
  10   2  -7 1035.00   32.80
 -10   2   7 1075.69   32.80
  -9  -2   7  146.69    4.40
  -9  -2   7  151.28    4.40
   9  -2  -7  150.68    4.60
   9   2  -7  146.99    4.40
  -9   2   7  151.58    4.40
  -9   2   7  144.69    4.40
   9   2  -7  147.99    4.40
  -9   2   7  142.39    4.40
  -9   2   7  156.38    4.40
  -9   2   7  140.49    4.40
  -8  -2   7    2.20    0.20
   8  -2  -7    1.80    0.20
  -8   2   7    2.30    0.10
   8   2  -7    2.10    0.10
  -8   2   7    2.10    0.20
   8   2  -7    2.00    0.20
   7  -2  -7   48.60    1.60
   7   2  -7   46.70    1.70
   7   2  -7   48.80    1.50
   7   2  -7   49.70    1.60
  -6  -2   7  127.39    3.70
   6  -2  -7  125.99    3.70
   6   2  -7  126.19    3.60
   6   2  -7  107.89    3.70
   6   2  -7  117.89    3.80
  -6   2   7  124.49    3.70
  -5  -2   7  273.57    8.10
   5   2  -7  267.57    8.20
  -5   2   7  277.27    8.10
  -4  -2   7   33.40    1.10
   4   2  -7   33.30    1.20
  -4   2   7   33.90    1.10
  -3  -2   7   71.99    2.20
  -3   2   7   72.99    2.30
  -2  -2   7    1.20    0.20
  -2   2   7    1.40    0.20
  -1  -2   7   79.79    2.50
  -1   2   7   80.99    2.50
   0  -2   7  236.28    7.20
   0   2   7  248.08    7.20
   1  -2   7  188.08    5.60
  -1  -2  -7  176.48    5.50
   1   2   7  191.88    5.60
   2  -2   7 1989.40   59.39
  -2  -2  -7 2004.00   59.29
   2   2   7 2084.39   59.39
   3  -2   7  134.29    3.90
   3  -2   7  134.99    4.10
  -3  -2  -7  136.59    3.90
   3   2   7  134.89    3.90
  -3   2  -7  129.69    3.90
  -3   2  -7  126.59    3.90
   3   2   7  131.89    3.90
   3   2   7  133.29    4.00
   3   2   7  128.69    4.10
   3   2   7  128.69    3.90
   4  -2   7    6.00    0.40
  -4  -2  -7    5.80    0.30
   4  -2   7    5.70    0.30
  -4  -2  -7    5.80    0.20
   4   2   7    6.10    0.30
   4   2   7    6.40    0.30
   4   2   7    5.50    0.30
  -4   2  -7    5.40    0.30
   4   2   7    5.80    0.40
   4   2   7    6.40    0.30
  -4   2  -7    5.90    0.30
  -5  -2  -7   29.80    0.90
  -5  -2  -7   26.20    0.90
   5  -2   7   26.10    0.90
   5   2   7   26.50    0.90
   5   2   7   27.70    0.90
   5   2   7   26.60    0.90
   5   2   7   26.20    0.90
  -5   2  -7   26.50    0.90
  -5   2  -7   25.60    0.90
   6  -2   7   24.60    0.70
  -6  -2  -7   21.90    0.70
  -6  -2  -7   23.30    0.80
   6   2   7   23.50    0.80
   6   2   7   21.60    0.70
  -6   2  -7   22.30    0.80
  -7  -2  -7   41.40    1.30
  -7  -2  -7   40.30    1.30
  -7   2  -7   40.80    1.30
   7   2   7   41.70    1.30
  -7   2  -7   41.70    1.30
  -8  -2  -7   51.99    1.60
  -8   2  -7   50.59    1.60
  -8   2  -7   48.80    1.50
   8   2   7   47.00    1.50
  -9  -2  -7    1.10    0.10
   9   2   7    1.60    0.10
  -9   2  -7    1.30    0.10
 -10  -2  -7   22.50    0.70
 -10   2  -7   20.30    0.70
  10   2   7   20.10    0.70
 -10   2  -7   21.10    0.70
 -11  -2  -7   11.10    0.40
 -11   2  -7   10.70    0.40
 -11   2  -7   10.30    0.40
 -12  -2  -7    4.70    0.20
 -12   2  -7    4.70    0.20
 -16   3   7   32.30    1.00
 -16   3   7   31.00    1.00
 -16   3   7   30.90    1.00
  16   3  -7   31.90    1.00
 -16   3   7   32.50    1.00
  15  -3  -7    1.40    0.10
  15  -3  -7    1.50    0.10
 -15  -3   7    1.50    0.10
 -15   3   7    1.40    0.10
 -15   3   7    1.80    0.20
 -15   3   7    1.60    0.10
 -15   3   7    1.40    0.20
  15   3  -7    1.40    0.10
 -15   3   7    1.50    0.10
  15   3  -7    1.50    0.10
  14  -3  -7   37.90    1.20
 -14  -3   7   37.70    1.20
  14  -3  -7   36.90    1.20
  14   3  -7   38.60    1.20
 -14   3   7   37.80    1.20
 -14   3   7   37.60    1.20
 -14   3   7   35.90    1.20
 -14   3   7   37.90    1.20
 -14   3   7   38.10    1.20
  14   3  -7   36.90    1.20
 -13  -3   7    6.60    0.30
  13  -3  -7    6.80    0.30
 -13   3   7    7.00    0.30
  13   3  -7    7.00    0.30
 -13   3   7    7.00    0.30
  13   3  -7    7.00    0.30
 -13   3   7    6.80    0.30
 -13   3   7    6.40    0.30
 -13   3   7    7.00    0.30
  12  -3  -7    7.20    0.30
 -12   3   7    7.60    0.40
 -12   3   7    7.10    0.30
 -12   3   7    7.30    0.30
  12   3  -7    7.00    0.30
 -12   3   7    6.80    0.30
 -12   3   7    7.70    0.30
  12   3  -7    7.20    0.30
  11   3  -7   49.80    1.50
 -11   3   7   49.00    1.50
  11   3  -7   46.00    1.50
 -11   3   7   48.80    1.50
 -11   3   7   46.90    1.50
 -11   3   7   50.29    1.50
 -11   3   7   47.00    1.50
  10   3  -7  266.57    7.50
 -10   3   7  249.68    7.50
 -10   3   7  250.47    7.50
 -10   3   7  253.47    7.50
 -10   3   7  250.17    7.50
 -10   3   7  260.37    7.50
  10   3  -7  237.48    7.50
   9   3  -7    1.40    0.20
  -9   3   7    1.90    0.20
  -9   3   7    1.00    0.10
  -9   3   7    1.40    0.10
  -9   3   7    1.40    0.10
  -8  -3   7   64.09    2.00
   8   3  -7   68.39    2.10
  -8   3   7   65.39    2.00
  -8   3   7   66.79    2.00
  -8   3   7   66.59    2.00
  -7  -3   7   20.20    0.70
  -7   3   7   21.10    0.70
  -7   3   7   20.00    0.70
  -7   3   7   20.70    0.70
   7   3  -7   21.00    0.70
  -6  -3   7    1.20    0.10
   6   3  -7    1.30    0.10
  -6   3   7    1.00    0.10
  -6   3   7    1.20    0.10
  -5  -3   7    0.60    0.10
  -5   3   7    0.50    0.10
   5   3  -7    0.50    0.10
  -5   3   7    0.50    0.10
  -4  -3   7   69.69    2.20
  -4  -3   7   74.59    2.20
   4   3  -7   71.79    2.20
  -4   3   7   73.09    2.20
  -4   3   7   74.89    2.20
  -4   3   7   73.99    2.20
  -2  -3   7    0.00    0.10
  -2  -3   7    0.30    0.10
   2   3  -7    0.50    0.10
  -2   3   7    0.10    0.10
  -2   3   7    0.00    0.10
  -2   3   7    0.20    0.10
   2   3  -7    0.30    0.10
  -1  -3   7   87.99    2.70
  -1  -3   7   91.99    2.70
   1   3  -7   87.39    2.70
  -1   3   7   90.49    2.70
   1   3  -7   86.09    2.70
  -1   3   7   90.69    2.70
  -1   3   7   87.69    2.70
   0  -3   7    8.80    0.30
   0  -3   7    8.60    0.40
   0   3   7    9.50    0.30
   0   3  -7    8.60    0.40
   0   3  -7    8.70    0.30
   0   3   7    9.20    0.40
   0   3  -7    8.50    0.30
   0   3   7    8.00    0.30
   1  -3   7  743.33   21.50
   1  -3   7  738.73   21.50
  -1  -3  -7  735.13   21.50
   1   3   7  769.52   21.50
  -1   3  -7  733.23   21.50
  -1   3  -7  707.73   21.50
  -1   3  -7  708.33   21.50
   1   3   7  727.03   21.50
   1   3   7  732.93   21.50
   2  -3   7   10.90    0.40
   2  -3   7   10.10    0.40
  -2  -3  -7   10.80    0.40
  -2   3  -7   10.90    0.40
  -2   3  -7   10.50    0.40
  -2   3  -7   10.90    0.40
   2   3   7   10.70    0.40
   2   3   7   11.10    0.40
   2   3   7   11.40    0.50
  -3  -3  -7   40.40    1.30
  -3  -3  -7   42.00    1.30
   3  -3   7   41.40    1.30
   3   3   7   42.40    1.30
   3   3   7   43.90    1.40
   3   3   7   42.20    1.30
   3   3   7   42.00    1.30
  -3   3  -7   42.50    1.30
  -3   3  -7   46.10    1.30
   4  -3   7    0.60    0.10
  -4  -3  -7    0.50    0.10
  -4  -3  -7    0.80    0.10
   4   3   7    0.60    0.10
   4   3   7    0.50    0.10
  -4   3  -7    0.40    0.10
  -5  -3  -7  166.28    4.80
   5  -3   7  160.18    4.80
  -5  -3  -7  164.18    4.90
  -5   3  -7  165.78    4.90
   5   3   7  156.98    4.80
   5   3   7  163.38    4.90
   5   3   7  165.28    4.90
  -5   3  -7  165.48    4.90
  -6  -3  -7    0.00    0.10
   6  -3   7    0.10    0.10
   6   3   7   -0.10    0.10
  -6   3  -7    0.20    0.10
  -6   3  -7    0.10    0.10
   6   3   7    0.00    0.10
   6   3   7    0.00    0.10
  -7  -3  -7   18.40    0.60
  -7  -3  -7   17.40    0.60
   7  -3   7   18.40    0.70
   7   3   7   18.30    0.60
  -7   3  -7   18.70    0.60
  -7   3  -7   18.60    0.60
  -8  -3  -7    1.20    0.10
   8   3   7    1.30    0.10
  -8   3  -7    1.40    0.10
  -8   3  -7    1.10    0.10
  -9  -3  -7  174.58    5.10
  -9   3  -7  176.18    5.10
   9   3   7  166.78    5.10
  -9   3  -7  172.28    5.10
 -10  -3  -7   21.60    0.70
 -10   3  -7   22.00    0.70
 -10   3  -7   22.10    0.70
  10   3   7   20.00    0.70
 -11   3  -7   45.10    1.40
  14   4  -7    1.10    0.10
 -14   4   7    0.70    0.10
 -14   4   7    0.90    0.10
 -14   4   7    0.90    0.10
 -13   4   7   11.30    0.40
 -13   4   7   11.20    0.40
 -13   4   7   10.90    0.40
  13   4  -7   11.10    0.40
 -13   4   7   11.40    0.40
  13   4  -7   10.30    0.40
  12  -4  -7   60.49    1.80
  12   4  -7   58.09    1.80
 -12   4   7   58.49    1.80
 -12   4   7   60.39    1.80
  12   4  -7   58.29    1.80
 -12   4   7   56.99    1.80
 -11   4   7    9.00    0.40
  11   4  -7    8.80    0.40
  11   4  -7    8.70    0.40
 -11   4   7    9.00    0.40
 -11   4   7    9.00    0.30
 -10   4   7    0.30    0.10
 -10   4   7    0.30    0.10
 -10   4   7    0.30    0.10
  10   4  -7    0.30    0.10
  -9  -4   7  239.28    7.50
  -9   4   7  252.57    7.40
  -9   4   7  256.07    7.40
   9   4  -7  251.07    7.40
  -9   4   7  251.17    7.40
  -8  -4   7   37.20    1.20
   8   4  -7   37.20    1.20
  -8   4   7   36.50    1.20
  -8   4   7   36.90    1.20
  -8   4   7   35.70    1.20
  -7  -4   7   11.20    0.50
  -7   4   7   11.20    0.40
  -7   4   7   11.60    0.40
  -7   4   7   11.40    0.40
   7   4  -7   11.10    0.50
  -6  -4   7   17.70    0.60
  -6   4   7   16.90    0.60
  -6   4   7   16.70    0.60
   6   4  -7   17.40    0.60
  -6   4   7   16.40    0.60
  -5  -4   7   42.80    1.40
  -5  -4   7   45.30    1.40
  -5   4   7   43.60    1.40
  -5   4   7   43.60    1.30
   5   4  -7   45.70    1.40
  -5   4   7   42.40    1.40
  -4  -4   7   15.80    0.50
  -4  -4   7   15.50    0.60
  -4   4   7   16.10    0.50
   4   4  -7   16.00    0.60
  -4   4   7   15.50    0.60
  -4   4   7   15.50    0.60
  -4   4   7   15.30    0.50
  -3  -4   7   41.10    1.30
  -3   4   7   41.10    1.30
  -3   4   7   40.80    1.30
  -3   4   7   43.10    1.30
  -3   4   7   41.40    1.30
   3   4  -7   40.30    1.30
  -2  -4   7   87.29    2.70
  -2  -4   7   90.29    2.70
  -2   4   7   87.99    2.70
   2   4  -7   89.59    2.70
  -2   4   7   86.19    2.70
  -2   4   7   92.29    2.70
  -2   4   7   90.99    2.70
  -1  -4   7   57.09    1.80
   1  -4  -7   52.59    1.70
  -1  -4   7   56.19    1.80
  -1   4   7   58.49    1.80
   1   4  -7   56.79    1.80
  -1   4   7   57.79    1.70
   1   4  -7   59.69    1.80
  -1   4   7   56.99    1.80
  -1   4   7   58.99    1.80
   0  -4   7  317.47    9.50
   0  -4  -7  310.57    9.50
   0  -4   7  315.27    9.50
   0   4   7  339.27    9.50
   0   4  -7  316.47    9.50
   0   4   7  325.37    9.50
   0   4   7  323.07    9.50
   0   4  -7  326.67    9.50
  -1  -4  -7   40.70    1.20
   1  -4   7   38.60    1.30
   1  -4   7   39.70    1.30
  -1   4  -7   39.90    1.30
   1   4   7   40.30    1.30
   1   4   7   41.60    1.30
   1   4   7   39.40    1.30
  -1   4  -7   40.30    1.30
  -2  -4  -7   13.80    0.50
   2  -4   7   13.80    0.50
   2  -4   7   14.20    0.50
  -2   4  -7   14.50    0.50
   2   4   7   13.90    0.50
  -2   4  -7   14.40    0.50
   2   4   7   14.40    0.50
   2   4   7   15.10    0.60
  -3  -4  -7  127.49    3.70
   3  -4   7  128.09    3.70
  -3   4  -7  117.39    3.70
   3   4   7  123.09    3.70
  -3   4  -7  124.09    3.80
   3   4   7  130.29    3.80
  -3   4  -7  125.09    3.70
   3   4   7  123.09    3.70
  -4  -4  -7   43.80    1.30
   4  -4   7   44.90    1.40
  -4   4  -7   42.40    1.40
   4   4   7   43.30    1.40
  -4   4  -7   42.00    1.40
   4   4   7   45.70    1.40
   4   4   7   42.90    1.30
  -4   4  -7   43.60    1.40
  -5  -4  -7    6.60    0.30
   5  -4   7    6.70    0.30
   5   4   7    7.20    0.30
  -5   4  -7    6.70    0.30
   5   4   7    7.30    0.30
  -5   4  -7    7.20    0.30
   5   4   7    7.00    0.30
  -6  -4  -7   30.00    1.00
   6  -4   7   31.00    1.00
   6   4   7   30.00    1.00
   6   4   7   31.10    1.00
  -6   4  -7   32.90    1.00
   6   4   7   31.50    1.00
  -6   4  -7   30.90    1.00
  -7   4  -7   40.40    1.20
   7   4   7   39.50    1.20
  -7   4  -7   40.40    1.20
   8   4   7    1.80    0.10
  -8   4  -7    1.90    0.10
  -8   4  -7    1.80    0.10
  -9   4  -7   12.10    0.40
  -9   4  -7   11.90    0.40
 -11   5   7   20.50    0.60
  11   5  -7   18.70    0.60
 -11   5   7   18.80    0.60
 -11   5   7   18.10    0.60
  10  -5  -7    0.00    0.10
 -10   5   7    0.00    0.10
 -10   5   7    0.10    0.10
  10   5  -7   -0.10    0.10
 -10   5   7    0.20    0.10
  -9  -5   7   19.40    0.70
  -9   5   7   19.00    0.60
  -9   5   7   19.90    0.60
  -9   5   7   20.10    0.60
   9   5  -7   19.40    0.70
  -8  -5   7   71.79    2.20
  -8   5   7   71.89    2.20
   8   5  -7   71.09    2.20
  -8   5   7   71.79    2.20
  -7  -5   7   34.60    1.10
   7   5  -7   32.90    1.10
  -7   5   7   32.50    1.00
  -7   5   7   32.00    1.00
  -6  -5   7   64.59    2.00
   6   5  -7   64.69    2.00
  -6   5   7   62.39    1.90
  -6   5   7   62.99    1.90
  -6   5   7   63.39    1.90
  -5  -5   7    4.30    0.30
  -5  -5   7    4.10    0.20
  -5   5   7    4.30    0.20
  -5   5   7    4.60    0.20
   5   5  -7    4.20    0.20
  -5   5   7    4.30    0.20
  -4  -5   7    3.30    0.20
  -4  -5   7    3.30    0.20
   4  -5  -7    3.10    0.10
  -4   5   7    3.50    0.20
  -4   5   7    3.20    0.20
  -4   5   7    3.20    0.20
  -4   5   7    3.40    0.20
   4   5  -7    3.20    0.20
  -3  -5   7   70.99    2.20
   3  -5  -7   66.19    2.10
  -3  -5   7   69.89    2.10
  -3   5   7   70.69    2.10
  -3   5   7   66.49    2.10
   3   5  -7   72.79    2.10
  -3   5   7   69.89    2.10
  -3   5   7   68.99    2.10
  -2  -5   7    8.20    0.30
  -2  -5   7    7.80    0.40
   2  -5  -7    7.90    0.30
  -2   5   7    7.80    0.40
  -2   5   7    7.60    0.30
   2   5  -7    7.70    0.40
  -2   5   7    8.40    0.30
  -2   5   7    7.90    0.30
  -1  -5   7   32.30    1.00
   1  -5  -7   32.10    1.00
  -1  -5   7   31.60    1.10
  -1   5   7   32.20    1.00
  -1   5   7   30.50    1.00
  -1   5   7   32.50    1.10
   1   5  -7   31.90    1.00
  -1   5   7   31.40    1.00
   0  -5   7    5.90    0.30
   0  -5  -7    6.30    0.20
   0  -5   7    6.40    0.30
   0   5   7    6.10    0.30
   0   5  -7    6.30    0.30
   0   5   7    6.10    0.30
   0   5   7    6.10    0.30
   0   5   7    6.10    0.30
   1  -5   7    1.10    0.10
   1  -5   7    1.20    0.10
  -1  -5  -7    1.10    0.10
   1   5   7    1.10    0.10
   1   5   7    1.20    0.10
   1   5   7    1.00    0.20
  -1   5  -7    1.30    0.10
   2  -5   7   11.30    0.40
   2  -5   7   10.00    0.40
  -2  -5  -7   10.90    0.40
   2   5   7   11.10    0.40
  -2   5  -7   11.80    0.40
   2   5   7   11.50    0.40
   2   5   7   11.50    0.50
   3  -5   7   28.40    0.90
  -3  -5  -7   27.10    0.90
   3   5   7   27.50    0.90
  -3   5  -7   28.30    0.90
  -3   5  -7   26.80    0.90
   3   5   7   28.50    0.90
   3   5   7   29.70    0.90
  -4  -5  -7   15.20    0.50
   4  -5   7   16.30    0.50
  -4   5  -7   15.60    0.50
   4   5   7   16.10    0.50
   4   5   7   16.00    0.50
   4   5   7   16.10    0.60
  -4   5  -7   15.40    0.50
   5  -5   7    8.40    0.30
  -5  -5  -7    7.50    0.30
   5   5   7    8.40    0.30
  -5   5  -7    8.20    0.30
   5   5   7    8.60    0.30
  -5   5  -7    8.50    0.30
   5   5   7    8.60    0.30
  -6   5  -7    2.10    0.10
  -6  -6   7   11.00    0.40
  -5  -6   7    6.10    0.30
   5   6  -7    5.90    0.20
  -4  -6   7    6.10    0.30
   4   6  -7    5.90    0.20
  -4   6   7    5.20    0.30
  -4   6   7    5.70    0.20
  -3  -6   7    3.60    0.20
  -3  -6   7    3.50    0.20
   3   6  -7    3.60    0.20
  -3   6   7    3.70    0.20
  -3   6   7    3.60    0.20
  -3   6   7    3.50    0.20
  -2  -6   7    0.00    0.10
  -2  -6   7    0.00    0.10
   2  -6  -7    0.10    0.10
  -2   6   7    0.10    0.10
  -2   6   7    0.10    0.10
   2   6  -7   -0.10    0.10
  -2   6   7    0.10    0.10
  -1  -6   7    3.30    0.20
   1  -6  -7    3.60    0.20
  -1  -6   7    3.80    0.20
   1   6  -7    3.70    0.20
  -1   6   7    3.50    0.20
   0  -6  -7    4.80    0.20
   0   6  -7    4.90    0.20
   0   6   7    5.10    0.20
   1  -6   7    7.20    0.30
  -1  -6  -7    7.10    0.30
  -1   6  -7    6.90    0.30
   1   6   7    7.50    0.30
   1   6   7    6.90    0.30
 -18   0   8    0.30    0.10
  18   0  -8    0.40    0.10
 -18   0   8    0.40    0.10
 -17   0   8    3.00    0.20
 -17   0   8    2.90    0.20
 -17   0   8    2.80    0.20
  17   0  -8    2.90    0.20
 -17   0   8    2.80    0.20
  17   0  -8    2.80    0.20
  16   0  -8   33.80    1.10
 -16   0   8   33.20    1.10
 -16   0   8   33.50    1.10
 -16   0   8   32.40    1.10
  16   0  -8   34.30    1.00
 -16   0   8   33.30    1.10
 -15   0   8   42.70    1.40
 -15   0   8   42.50    1.40
  15   0  -8   42.60    1.40
 -15   0   8   42.10    1.30
 -15   0   8   42.20    1.30
  15   0  -8   46.30    1.30
 -14   0   8  395.96   11.80
 -14   0   8  409.56   11.80
 -14   0   8  399.26   11.80
 -14   0   8  400.46   11.80
 -14   0   8  401.26   11.80
  14   0  -8  414.96   11.80
  14   0  -8  384.66   11.80
 -13   0   8   57.79    1.70
 -13   0   8   52.89    1.70
 -13   0   8   56.29    1.70
 -13   0   8   55.89    1.70
 -13   0   8   58.09    1.80
  13   0  -8   57.49    1.70
  13   0  -8   49.70    1.70
  12   0  -8  142.19    4.10
  12   0  -8  126.29    4.40
  12   0  -8  130.69    4.10
 -12   0   8  139.09    4.10
 -12   0   8  146.69    4.10
 -12   0   8  140.89    4.10
 -12   0   8  130.09    4.10
 -12   0   8  142.29    4.10
  11   0  -8  172.08    5.40
 -11   0   8  170.48    5.20
 -11   0   8  181.78    5.20
 -11   0   8  173.78    5.10
 -11   0   8  171.78    5.10
 -11   0   8  164.78    5.10
  11   0  -8  174.88    5.10
  10   0  -8  281.57    8.10
 -10   0   8  267.17    7.90
  10   0  -8  253.77    7.90
 -10   0   8  274.27    7.90
 -10   0   8  271.97    7.90
 -10   0   8  256.57    7.90
   9   0  -8  101.49    3.20
   9   0  -8  108.09    3.30
   9   0  -8  115.79    3.40
   8   0  -8    9.50    0.50
   8   0  -8    9.80    0.50
  -8   0   8   10.10    0.50
   7   0  -8  110.89    3.40
  -7   0   8  111.59    3.40
   6   0  -8   47.80    1.50
  -6   0   8   45.10    1.50
   5   0  -8   17.40    0.60
  -5   0   8   17.10    0.70
  -4   0   8  191.88    5.80
  -3   0   8  424.96   12.60
  -2   0   8 1653.13   48.90
  -1   0   8   41.70    1.40
   0   0   8   85.69    2.70
  -1   0  -8   18.30    0.60
   1   0   8   17.40    0.70
   2   0   8   64.19    2.10
  -2   0  -8   64.99    1.90
   3   0   8  217.08    6.60
  -3   0  -8  221.18    6.50
   4   0   8    5.30    0.40
   4   0   8    5.50    0.20
  -4   0  -8    4.70    0.20
   4   0   8    5.70    0.30
  -4   0  -8    5.30    0.20
   5   0   8  446.26   13.10
   5   0   8  456.95   13.10
   5   0   8  445.76   13.30
  -5   0  -8  441.06   13.10
  -5   0  -8  451.65   13.10
  -5   0  -8  437.96   13.10
  -6   0  -8   46.20    1.40
   6   0   8   47.40    1.40
   6   0   8   45.60    1.40
  -6   0  -8   44.20    1.40
  -7   0  -8  124.29    3.70
  -8   0  -8   17.30    0.60
  -9   0  -8    0.30    0.10
 -10   0  -8  190.28    5.60
 -11   0  -8    0.20    0.10
 -18  -1   8    2.90    0.20
 -18   1   8    2.70    0.10
  17  -1  -8    0.40    0.10
  17  -1  -8    0.40    0.10
 -17  -1   8    0.30    0.10
 -17  -1   8    0.40    0.10
  17   1  -8    0.30    0.10
 -17   1   8    0.40    0.10
 -17   1   8    0.60    0.10
 -17   1   8    0.30    0.10
  17   1  -8    0.30    0.10
 -16  -1   8    0.50    0.10
 -16  -1   8    0.50    0.10
  16  -1  -8    0.50    0.10
  16  -1  -8    0.60    0.10
  16   1  -8    0.50    0.10
 -16   1   8    0.50    0.10
 -16   1   8    0.50    0.10
 -16   1   8    0.50    0.10
  16   1  -8    0.50    0.10
 -16   1   8    0.40    0.10
 -16   1   8    0.60    0.10
 -15  -1   8    6.30    0.30
  15  -1  -8    6.20    0.30
 -15  -1   8    6.30    0.30
  15  -1  -8    6.30    0.30
 -15   1   8    5.80    0.30
 -15   1   8    6.30    0.30
 -15   1   8    6.10    0.30
 -15   1   8    6.30    0.30
  15   1  -8    6.40    0.30
  15   1  -8    6.40    0.30
 -15   1   8    6.50    0.30
 -14  -1   8  116.99    3.50
 -14  -1   8  111.79    3.50
 -14  -1   8  110.49    3.50
  14  -1  -8  121.59    3.50
 -14  -1   8  119.69    3.50
  14   1  -8  113.69    3.50
 -14   1   8  118.89    3.50
 -14   1   8  116.49    3.50
 -14   1   8  116.39    3.50
  14   1  -8  120.99    3.50
 -14   1   8  113.99    3.50
 -14   1   8  120.79    3.50
 -13  -1   8   11.60    0.50
  13  -1  -8   11.30    0.40
 -13  -1   8   11.20    0.40
 -13  -1   8   12.00    0.50
 -13  -1   8   11.70    0.40
  13   1  -8   11.80    0.40
 -13   1   8   12.00    0.40
 -13   1   8   11.20    0.40
  13   1  -8   10.80    0.40
 -13   1   8   11.40    0.40
 -13   1   8   11.70    0.50
 -13   1   8   11.60    0.50
 -12  -1   8   29.20    0.90
 -12  -1   8   30.20    1.00
  12  -1  -8   29.40    0.90
 -12  -1   8   28.80    0.90
 -12  -1   8   31.20    1.00
 -12   1   8   27.80    1.00
 -12   1   8   29.20    1.00
 -12   1   8   29.50    1.00
 -12   1   8   29.00    1.00
  12   1  -8   29.90    0.90
 -12   1   8   30.80    1.00
  12   1  -8   27.30    1.00
 -11  -1   8   28.90    0.90
 -11  -1   8   27.50    0.90
  11  -1  -8   27.10    1.10
 -11  -1   8   26.80    0.90
 -11  -1   8   29.70    1.00
 -11   1   8   28.40    0.90
  11   1  -8   28.70    0.90
 -11   1   8   28.90    0.90
 -11   1   8   30.60    0.90
 -11   1   8   28.40    0.90
  11   1  -8   27.90    1.10
 -11   1   8   28.70    0.90
 -10  -1   8    0.30    0.10
 -10  -1   8    0.10    0.10
 -10  -1   8    0.20    0.10
 -10  -1   8    0.10    0.10
  10  -1  -8    0.00    0.20
  10   1  -8    0.00    0.10
 -10   1   8    0.20    0.10
  10   1  -8   -0.10    0.20
 -10   1   8    0.00    0.10
 -10   1   8    0.10    0.10
 -10   1   8    0.10    0.10
 -10   1   8    0.00    0.10
  -9  -1   8   12.00    0.40
  -9  -1   8   12.40    0.40
  -9  -1   8   12.40    0.50
  -9  -1   8   13.10    0.50
   9  -1  -8   12.80    0.60
  -9   1   8   12.00    0.50
   9   1  -8   11.70    0.40
  -9   1   8   12.30    0.40
  -9   1   8   12.30    0.40
   9   1  -8   11.80    0.60
   9   1  -8   13.40    0.60
   8  -1  -8  105.99    3.20
   8  -1  -8  110.09    3.30
  -8  -1   8  109.49    3.30
  -8   1   8  107.69    3.30
   8   1  -8  103.19    3.30
   8   1  -8  104.59    3.30
   8   1  -8  101.19    3.10
   7  -1  -8  679.63   20.60
  -7  -1   8  709.43   20.70
   7  -1  -8  706.93   20.70
   7   1  -8  677.63   20.70
   7   1  -8  734.93   20.70
   7   1  -8  667.53   20.50
  -7   1   8  729.03   20.70
  -6  -1   8  174.28    5.30
   6   1  -8  172.88    5.30
  -6   1   8  176.38    5.30
  -5  -1   8   36.90    1.20
  -5   1   8   36.00    1.20
   5   1  -8   36.40    1.30
  -4  -1   8   77.59    2.40
   4   1  -8   77.59    2.50
  -4   1   8   76.99    2.40
  -3  -1   8  299.87    8.90
  -3   1   8  296.97    8.90
  -2  -1   8 1165.68   34.60
  -2   1   8 1191.48   34.60
  -1  -1   8   49.20    1.60
  -1   1   8   48.90    1.60
   0  -1   8    7.60    0.40
   0   1   8    7.00    0.40
  -1  -1  -8 1322.37   42.50
   1  -1   8 1548.05   42.70
   1   1   8 1519.45   42.70
  -1   1  -8 1424.36   42.60
   2  -1   8  259.17    7.70
  -2  -1  -8  259.57    7.50
  -2   1  -8  243.18    7.50
   2   1   8  264.57    7.70
   3  -1   8  156.98    4.80
  -3  -1  -8  169.08    4.80
   3  -1   8  166.48    4.90
   3   1   8  166.78    5.00
  -3   1  -8  146.29    4.80
   3   1   8  161.18    4.80
  -3   1  -8  156.68    4.80
   3   1   8  169.48    4.80
   3   1   8  155.18    4.80
  -3   1  -8  163.88    4.80
   4  -1   8    8.40    0.50
   4  -1   8    8.60    0.30
  -4  -1  -8    9.00    0.30
   4   1   8    8.50    0.30
   4   1   8    9.00    0.40
   4   1   8    8.60    0.50
   4   1   8    8.60    0.40
  -4   1  -8    8.50    0.30
  -4   1  -8    8.80    0.30
   5  -1   8   14.50    0.50
  -5  -1  -8   14.10    0.50
  -5  -1  -8   14.60    0.50
   5  -1   8   13.30    0.70
   5   1   8   14.70    0.50
   5   1   8   14.30    0.50
  -5   1  -8   13.70    0.50
  -5   1  -8   14.10    0.50
   5   1   8   13.60    0.70
  -6  -1  -8   34.40    1.10
   6  -1   8   35.00    1.10
  -6  -1  -8   33.80    1.10
   6   1   8   35.20    1.10
   6   1   8   33.90    1.10
  -6   1  -8   33.50    1.10
  -6   1  -8   35.10    1.10
  -7  -1  -8    6.60    0.30
  -7   1  -8    6.50    0.30
  -7   1  -8    6.00    0.30
  -8  -1  -8    6.10    0.30
  -8   1  -8    6.00    0.30
  -9  -1  -8    0.00    0.10
  -9   1  -8    0.10    0.10
 -10  -1  -8   30.70    1.00
 -10   1  -8   30.60    1.00
 -11  -1  -8   16.80    0.60
 -11   1  -8   15.50    0.50
 -12  -1  -8    0.80    0.10
 -17  -2   8   10.10    0.40
  17  -2  -8   10.20    0.40
 -17   2   8    9.80    0.30
 -17   2   8    9.70    0.30
 -17   2   8    9.50    0.40
  17   2  -8    8.50    0.40
  17   2  -8   10.30    0.30
  16  -2  -8    2.00    0.20
  16  -2  -8    1.90    0.10
 -16  -2   8    2.00    0.20
 -16   2   8    2.00    0.20
 -16   2   8    2.00    0.20
 -16   2   8    2.00    0.20
  16   2  -8    2.10    0.20
 -16   2   8    2.10    0.20
  16   2  -8    2.00    0.20
 -15  -2   8    6.00    0.30
  15  -2  -8    6.10    0.20
  15   2  -8    6.00    0.30
 -15   2   8    6.10    0.30
 -15   2   8    5.80    0.30
  15   2  -8    5.70    0.30
 -15   2   8    5.70    0.30
 -15   2   8    6.00    0.30
 -14  -2   8   27.60    0.90
  14  -2  -8   28.80    0.90
 -14  -2   8   29.20    0.90
  14   2  -8   29.40    0.90
 -14   2   8   28.20    0.90
 -14   2   8   28.90    0.90
 -14   2   8   25.40    0.90
 -14   2   8   28.00    0.90
 -14   2   8   26.90    0.90
  14   2  -8   27.10    0.90
  13  -2  -8    0.50    0.10
 -13  -2   8    0.30    0.10
 -13  -2   8    0.70    0.10
 -13   2   8    0.60    0.10
 -13   2   8    0.50    0.10
  13   2  -8    0.20    0.10
 -13   2   8    0.30    0.10
 -13   2   8    0.30    0.10
  13   2  -8    0.40    0.10
 -13   2   8    0.30    0.10
 -12  -2   8  174.18    5.10
 -12  -2   8  171.48    5.10
  12   2  -8  169.68    5.10
  12   2  -8  152.78    5.10
 -12   2   8  175.08    5.10
 -12   2   8  166.68    5.10
 -12   2   8  169.88    5.20
  12   2  -8  175.28    5.10
 -12   2   8  175.58    5.10
 -12   2   8  179.28    5.10
 -11  -2   8    0.40    0.10
 -11  -2   8    0.20    0.10
 -11   2   8    0.30    0.10
 -11   2   8    0.30    0.10
  11   2  -8    0.40    0.10
 -11   2   8    0.20    0.10
  11   2  -8    0.40    0.10
 -10  -2   8  269.57    8.20
 -10  -2   8  288.47    8.20
  10  -2  -8  265.87    8.40
 -10   2   8  276.17    8.20
  10   2  -8  277.97    8.20
 -10   2   8  284.37    8.20
 -10   2   8  275.57    8.20
 -10   2   8  286.87    8.20
  10   2  -8  277.47    8.20
  -9  -2   8    0.40    0.10
  -9  -2   8    0.50    0.10
   9  -2  -8    0.20    0.20
  -9  -2   8    0.50    0.10
   9   2  -8    0.50    0.10
  -9   2   8    0.40    0.10
  -9   2   8    0.40    0.10
  -9   2   8    0.30    0.10
  -8  -2   8   30.40    1.00
  -8  -2   8   30.10    1.00
  -8  -2   8   32.10    1.00
   8  -2  -8   29.90    1.10
  -8   2   8   30.50    1.00
  -8   2   8   31.10    1.00
  -8   2   8   31.10    1.00
   8   2  -8   30.90    1.00
   8   2  -8   30.70    1.00
  -7  -2   8    4.70    0.20
   7   2  -8    4.80    0.40
   7   2  -8    4.80    0.20
  -7   2   8    5.20    0.30
   7   2  -8    5.20    0.30
   7   2  -8    4.70    0.30
  -6  -2   8  422.26   12.40
   6  -2  -8  419.16   12.50
   6   2  -8  421.76   12.40
   6   2  -8  416.46   12.30
   6   2  -8  415.76   12.50
  -6   2   8  424.26   12.40
  -5  -2   8   90.89    2.80
   5   2  -8   91.59    2.90
   5   2  -8   91.89    2.70
  -5   2   8   91.19    2.80
  -4  -2   8   53.89    1.70
   4   2  -8   51.89    1.80
  -4   2   8   53.79    1.70
   4   2  -8   51.29    1.60
  -3  -2   8   73.99    2.30
  -3   2   8   75.49    2.30
   3   2  -8   68.89    2.20
  -2  -2   8   77.59    2.40
  -2   2   8   77.99    2.40
   2   2  -8   73.09    2.30
  -1  -2   8    6.50    0.40
   1   2  -8    6.10    0.20
  -1   2   8    6.90    0.40
   0  -2   8  140.59    4.30
   0   2   8  141.59    4.30
   1  -2   8   28.90    0.90
   1  -2   8   30.60    1.00
   1  -2   8   28.90    0.90
  -1  -2  -8   28.40    0.90
   1   2   8   28.60    1.00
   1   2   8   29.10    1.00
   1   2   8   29.80    1.00
  -1   2  -8   27.90    0.90
  -1   2  -8   28.80    0.90
   1   2   8   28.60    0.90
   2  -2   8  284.97    8.80
   2  -2   8  294.37    8.60
   2  -2   8  283.07    8.60
  -2  -2  -8  299.47    8.60
   2   2   8  293.37    8.70
   2   2   8  284.77    8.80
   2   2   8  297.27    8.60
  -2   2  -8  284.67    8.60
  -2   2  -8  292.37    8.60
   2   2   8  310.57    8.60
  -3  -2  -8  175.78    5.10
   3  -2   8  157.18    5.20
   3  -2   8  171.78    5.10
   3   2   8  175.38    5.10
   3   2   8  163.38    5.20
  -3   2  -8  173.38    5.10
  -3   2  -8  172.68    5.10
   3   2   8  173.88    5.10
   3   2   8  176.38    5.10
  -4  -2  -8   90.79    2.70
   4  -2   8   86.49    2.70
  -4  -2  -8   91.19    2.70
   4   2   8   90.29    2.70
   4   2   8   90.09    2.70
   4   2   8   88.79    2.70
  -4   2  -8   84.79    2.70
  -4   2  -8   89.39    2.70
  -5  -2  -8   56.99    1.70
   5  -2   8   53.29    1.70
  -5  -2  -8   55.99    1.70
  -5   2  -8   55.79    1.70
   5   2   8   55.39    1.70
   5   2   8   55.49    1.70
   5   2   8   55.99    1.70
   6  -2   8    9.00    0.30
  -6  -2  -8    8.90    0.40
  -6  -2  -8    8.60    0.30
  -6   2  -8    9.00    0.40
  -6   2  -8    9.00    0.40
   6   2   8    9.20    0.30
  -7  -2  -8    0.30    0.10
  -7  -2  -8    0.00    0.10
  -7   2  -8    0.10    0.10
  -7   2  -8    0.10    0.10
  -8  -2  -8    7.60    0.30
  -8   2  -8    7.40    0.30
  -8   2  -8    7.30    0.30
  -9  -2  -8   15.80    0.60
  -9   2  -8   15.20    0.50
  -9   2  -8   15.10    0.50
 -10  -2  -8    4.40    0.20
 -10   2  -8    4.50    0.20
 -10   2  -8    4.40    0.20
 -11  -2  -8    4.00    0.20
 -11   2  -8    3.90    0.20
  16  -3  -8    3.10    0.20
 -16   3   8    3.20    0.20
 -16   3   8    3.10    0.20
 -16   3   8    3.30    0.20
 -16   3   8    3.10    0.20
  15  -3  -8   33.50    1.00
 -15  -3   8   31.80    1.00
 -15   3   8   32.80    1.00
 -15   3   8   32.30    1.00
  15   3  -8   31.70    1.00
 -15   3   8   31.90    1.00
  15   3  -8   31.70    1.00
 -15   3   8   32.50    1.00
  14  -3  -8   14.70    0.50
 -14  -3   8   15.90    0.50
  14  -3  -8   15.90    0.50
 -14   3   8   15.70    0.50
  14   3  -8   15.50    0.50
 -14   3   8   15.90    0.50
 -14   3   8   15.90    0.50
 -14   3   8   16.10    0.60
  14   3  -8   15.60    0.50
 -14   3   8   14.70    0.50
 -13   3   8   53.49    1.60
  13   3  -8   52.19    1.60
 -13   3   8   53.09    1.60
 -13   3   8   51.89    1.60
  13   3  -8   50.69    1.60
 -13   3   8   51.49    1.60
 -13   3   8   49.70    1.60
 -12   3   8    3.10    0.20
  12   3  -8    4.00    0.20
 -12   3   8    3.40    0.20
 -12   3   8    3.40    0.20
 -12   3   8    3.20    0.20
  12   3  -8    3.00    0.30
 -12   3   8    3.20    0.20
 -11   3   8  103.79    3.00
 -11   3   8  100.69    3.00
 -11   3   8   94.69    3.00
  11   3  -8  103.49    3.00
 -11   3   8   96.99    3.00
 -11   3   8   97.69    3.00
 -10   3   8  279.07    8.20
 -10   3   8  275.97    8.20
 -10   3   8  267.97    8.20
 -10   3   8  270.87    8.20
 -10   3   8  284.67    8.20
  10   3  -8  289.97    8.30
  -9   3   8   90.09    2.70
  -9   3   8   90.59    2.70
  -9   3   8   87.89    2.70
  -9   3   8   89.09    2.70
   9   3  -8   90.79    2.70
  -8  -3   8    5.30    0.30
  -8   3   8    5.20    0.30
   8   3  -8    5.30    0.30
  -8   3   8    5.10    0.30
  -8   3   8    5.20    0.20
  -7  -3   8    0.60    0.10
  -7   3   8    0.90    0.10
  -6  -3   8    5.40    0.30
  -6   3   8    5.30    0.20
   6   3  -8    5.20    0.30
  -5  -3   8   17.70    0.60
  -5  -3   8   16.90    0.60
  -5   3   8   17.50    0.60
  -5   3   8   17.80    0.60
   5   3  -8   17.70    0.60
   5   3  -8   17.30    0.60
  -5   3   8   16.60    0.60
  -4  -3   8   12.30    0.40
  -4  -3   8   12.10    0.40
  -4  -3   8   12.60    0.50
  -4   3   8   12.00    0.50
  -4   3   8   11.90    0.40
   4   3  -8   12.20    0.50
  -4   3   8   12.20    0.40
   4   3  -8   12.50    0.40
  -3  -3   8    6.90    0.30
  -3  -3   8    6.90    0.30
   3   3  -8    7.90    0.30
  -3   3   8    6.90    0.30
   3   3  -8    7.10    0.30
  -3   3   8    6.60    0.30
  -2  -3   8   98.19    2.90
  -2  -3   8   91.59    2.80
   2   3  -8   93.39    2.80
  -2   3   8   90.69    2.80
  -2   3   8   95.69    2.90
   2   3  -8   92.89    2.80
   2   3  -8   91.79    2.80
  -2   3   8   95.89    2.80
  -1  -3   8   35.40    1.10
  -1  -3   8   35.50    1.20
  -1   3   8   35.50    1.10
   1   3  -8   36.50    1.10
   1   3  -8   37.40    1.10
  -1   3   8   35.80    1.10
  -1   3   8   36.30    1.20
   1   3  -8   34.90    1.10
   0  -3   8   24.80    0.80
   0  -3   8   25.90    0.80
   0   3  -8   25.00    0.80
   0   3   8   24.30    0.80
   0   3  -8   24.70    0.80
   0   3   8   26.10    0.90
   0   3   8   24.70    0.80
   0   3  -8   24.60    0.80
  -1  -3  -8  466.95   13.70
   1  -3   8  464.35   13.80
   1  -3   8  472.15   13.80
   1   3   8  440.86   13.80
   1   3   8  467.65   13.80
   1   3   8  485.05   13.80
  -1   3  -8  447.46   13.80
  -1   3  -8  486.85   13.80
  -1   3  -8  483.65   13.80
  -2  -3  -8  137.39    4.40
   2  -3   8  140.39    4.40
   2  -3   8  148.79    4.30
  -2  -3  -8  150.98    4.30
   2   3   8  154.28    4.40
   2   3   8  143.09    4.30
   2   3   8  147.09    4.30
  -2   3  -8  145.49    4.40
  -2   3  -8  151.88    4.40
   2   3   8  142.69    4.40
   3  -3   8  447.66   13.10
  -3  -3  -8  445.06   13.10
   3   3   8  443.46   13.10
   3   3   8  443.26   13.20
   3   3   8  462.75   13.20
  -3   3  -8  435.16   13.20
   3   3   8  455.75   13.20
  -3   3  -8  445.86   13.20
  -4  -3  -8   25.80    0.80
  -4  -3  -8   24.60    0.90
   4  -3   8   25.80    0.80
  -4   3  -8   25.90    0.80
   4   3   8   25.30    0.80
   4   3   8   25.10    0.80
  -4   3  -8   25.10    0.80
   4   3   8   25.40    0.90
  -5  -3  -8    1.70    0.10
  -5  -3  -8    1.70    0.20
   5  -3   8    1.90    0.20
  -5   3  -8    2.00    0.20
   5   3   8    1.70    0.20
   5   3   8    1.70    0.20
   5   3   8    1.80    0.20
  -5   3  -8    2.10    0.20
  -6  -3  -8    1.30    0.10
   6  -3   8    1.80    0.20
  -6  -3  -8    1.30    0.10
   6   3   8    1.50    0.10
   6   3   8    1.40    0.20
  -6   3  -8    1.30    0.10
  -6   3  -8    1.20    0.10
   6   3   8    1.30    0.10
  -7  -3  -8   11.90    0.40
  -7  -3  -8   10.40    0.40
  -7   3  -8   11.60    0.40
  -7   3  -8   11.40    0.40
   7   3   8   11.10    0.40
  -8  -3  -8    7.50    0.30
  -8   3  -8    7.30    0.30
  -8   3  -8    7.20    0.30
   8   3   8    6.70    0.30
  -9  -3  -8    2.30    0.20
  -9   3  -8    2.40    0.20
  -9   3  -8    2.50    0.20
 -10  -3  -8    9.70    0.40
 -10   3  -8    9.50    0.30
 -10   3  -8   10.20    0.30
 -14   4   8   50.69    1.50
 -13   4   8   18.30    0.60
  13   4  -8   19.00    0.60
 -13   4   8   19.90    0.60
 -13   4   8   20.10    0.60
 -12   4   8    0.50    0.10
 -12   4   8    0.60    0.10
  12   4  -8    0.50    0.10
 -12   4   8    0.40    0.10
  11   4  -8    4.80    0.20
 -11   4   8    4.90    0.20
 -11   4   8    4.60    0.20
 -11   4   8    4.80    0.30
  10   4  -8  199.98    5.80
 -10   4   8  188.08    5.70
 -10   4   8  195.78    5.70
 -10   4   8  189.98    5.70
  -9  -4   8   92.99    2.90
   9   4  -8   96.49    2.90
  -9   4   8   97.59    2.90
  -9   4   8   94.49    2.80
  -9   4   8   91.99    2.90
  -8  -4   8    7.50    0.30
  -8   4   8    6.90    0.30
  -8   4   8    7.10    0.30
   8   4  -8    7.50    0.30
  -7  -4   8    0.20    0.10
  -7   4   8    0.10    0.10
  -7   4   8    0.30    0.10
   7   4  -8    0.20    0.10
  -6  -4   8    8.20    0.40
  -6   4   8    7.90    0.30
  -6   4   8    8.10    0.30
   6   4  -8    8.20    0.40
  -6   4   8    7.90    0.30
  -5  -4   8   14.90    0.60
  -5  -4   8   14.10    0.50
  -5   4   8   14.00    0.50
   5   4  -8   14.90    0.50
  -5   4   8   13.50    0.50
  -5   4   8   14.40    0.50
  -5   4   8   14.20    0.50
  -4  -4   8   39.00    1.30
  -4  -4   8   37.30    1.20
   4   4  -8   38.20    1.20
  -4   4   8   37.30    1.30
  -4   4   8   37.30    1.20
  -4   4   8   39.10    1.20
  -4   4   8   38.70    1.20
  -3  -4   8    0.50    0.10
  -3   4   8    0.60    0.10
  -3   4   8    0.50    0.10
  -3   4   8    0.50    0.10
   3   4  -8    0.60    0.10
  -2  -4   8  188.38    5.40
  -2  -4   8  175.08    5.40
  -2   4   8  178.58    5.40
  -2   4   8  180.58    5.40
  -2   4   8  180.68    5.40
   2   4  -8  176.98    5.40
   2   4  -8  185.68    5.40
  -1  -4   8   64.59    2.00
  -1  -4   8   64.79    2.00
   1  -4  -8   62.19    1.90
  -1   4   8   64.39    2.00
  -1   4   8   67.19    2.00
   1   4  -8   67.19    2.00
  -1   4   8   63.79    2.00
   1   4  -8   64.69    2.00
   0  -4  -8    0.10    0.10
   0  -4   8    0.10    0.10
   0  -4   8    0.10    0.10
   0   4  -8    0.10    0.10
   0   4   8    0.00    0.10
   0   4  -8    0.00    0.10
   0   4   8    0.00    0.10
   0   4   8    0.00    0.10
   1  -4   8  351.86   10.00
  -1  -4  -8  342.77   10.00
   1  -4   8  330.87   10.00
   1   4   8  343.87   10.10
  -1   4  -8  340.37   10.00
   1   4   8  335.57   10.00
   1   4   8  339.67   10.00
  -1   4  -8  330.27   10.00
   2  -4   8   80.79    2.40
   2  -4   8   78.89    2.50
  -2  -4  -8   81.59    2.40
   2   4   8   80.69    2.40
   2   4   8   83.59    2.50
   2   4   8   80.59    2.40
  -2   4  -8   82.19    2.50
  -2   4  -8   79.89    2.50
  -2   4  -8   77.99    2.50
  -3  -4  -8    7.50    0.30
   3  -4   8    8.00    0.30
  -3   4  -8    7.70    0.30
   3   4   8    8.10    0.40
  -3   4  -8    7.40    0.30
   3   4   8    7.80    0.30
   3   4   8    7.60    0.30
  -3   4  -8    7.30    0.30
  -4  -4  -8    9.70    0.40
   4  -4   8   10.10    0.40
   4   4   8   10.50    0.40
   4   4   8    9.90    0.40
  -4   4  -8   10.40    0.40
  -4   4  -8   10.00    0.40
   4   4   8   10.10    0.40
   5  -4   8    5.30    0.20
  -5  -4  -8    5.40    0.20
   5   4   8    5.30    0.30
   5   4   8    5.10    0.20
   5   4   8    5.40    0.20
  -5   4  -8    5.80    0.30
  -5   4  -8    5.10    0.30
   6  -4   8   20.60    0.70
  -6  -4  -8   20.40    0.70
   6   4   8   20.60    0.70
   6   4   8   20.20    0.70
  -6   4  -8   21.20    0.70
  -6   4  -8   21.30    0.70
   7   4   8    8.10    0.30
  -7   4  -8    9.10    0.30
  -7   4  -8    8.80    0.30
  -8   4  -8    0.20    0.10
  -8   4  -8    0.30    0.10
  11   5  -8    6.00    0.20
 -11   5   8    5.40    0.30
 -10   5   8    1.20    0.10
  10   5  -8    1.00    0.10
 -10   5   8    1.30    0.10
  -9  -5   8    3.10    0.20
  -9   5   8    2.90    0.20
   9   5  -8    3.00    0.20
  -9   5   8    3.10    0.20
  -8  -5   8  155.58    4.60
  -8   5   8  153.28    4.60
   8   5  -8  158.58    4.60
  -8   5   8  151.98    4.60
  -7  -5   8   36.80    1.20
  -7   5   8   34.60    1.10
  -7   5   8   35.30    1.10
   7   5  -8   36.30    1.10
  -6  -5   8   34.20    1.10
  -6   5   8   32.40    1.00
  -6   5   8   32.90    1.00
   6   5  -8   33.10    1.10
  -6   5   8   32.40    1.00
  -5  -5   8   14.70    0.50
  -5  -5   8   13.40    0.50
   5   5  -8   15.00    0.50
  -5   5   8   13.80    0.50
  -5   5   8   14.10    0.50
  -5   5   8   14.60    0.50
  -4  -5   8   20.30    0.70
  -4  -5   8   18.60    0.60
  -4   5   8   17.90    0.70
  -4   5   8   19.10    0.60
   4   5  -8   19.60    0.70
  -4   5   8   19.60    0.60
  -4   5   8   19.50    0.60
  -3  -5   8   14.70    0.50
  -3  -5   8   14.90    0.50
   3  -5  -8   14.50    0.50
  -3   5   8   13.80    0.50
  -3   5   8   13.90    0.50
  -3   5   8   14.20    0.50
  -3   5   8   14.20    0.50
   3   5  -8   15.10    0.50
   2  -5  -8   13.00    0.40
  -2  -5   8   12.40    0.50
  -2  -5   8   12.90    0.50
  -2   5   8   12.40    0.50
  -2   5   8   12.30    0.50
   2   5  -8   13.30    0.50
  -2   5   8   12.40    0.40
   1  -5  -8   25.40    0.80
  -1  -5   8   26.40    0.80
  -1  -5   8   25.40    0.90
  -1   5   8   26.40    0.80
  -1   5   8   25.40    0.80
   1   5  -8   26.60    0.90
  -1   5   8   26.30    0.90
   0  -5   8    5.40    0.30
   0  -5  -8    6.10    0.20
   0  -5   8    5.80    0.30
   0   5   8    5.80    0.30
   0   5   8    5.80    0.30
   0   5  -8    5.80    0.30
   0   5   8    6.00    0.30
  -1  -5  -8    0.00    0.10
   1  -5   8    0.30    0.10
   1  -5   8    0.00    0.10
   1   5   8    0.10    0.10
  -1   5  -8    0.10    0.10
   1   5   8    0.10    0.10
   1   5   8    0.00    0.10
  -2  -5  -8   13.00    0.40
   2  -5   8   13.10    0.40
   2   5   8   13.60    0.50
   2   5   8   12.90    0.40
  -2   5  -8   12.00    0.40
  -2   5  -8   12.90    0.50
   2   5   8   12.80    0.40
   3  -5   8   38.50    1.10
  -3  -5  -8   36.90    1.10
   3   5   8   38.00    1.10
   3   5   8   36.70    1.10
   3   5   8   39.40    1.20
  -3   5  -8   35.90    1.20
  -3   5  -8   35.60    1.10
  -4  -5  -8    6.80    0.30
   4  -5   8    7.20    0.30
   4   5   8    7.10    0.30
   4   5   8    6.70    0.30
   4   5   8    7.50    0.30
  -4   5  -8    6.90    0.30
   5  -5   8   15.70    0.50
   5   5   8   16.80    0.60
  -4  -6   8    0.10    0.10
   4   6  -8    0.10    0.10
  -3  -6   8    0.30    0.10
   3   6  -8    0.30    0.10
   2   6  -8    2.60    0.10
  18   0  -9    0.00    0.10
 -18   0   9    0.10    0.10
 -18   0   9    0.10    0.10
  17   0  -9    0.00    0.10
  17   0  -9    0.00    0.10
 -17   0   9    0.10    0.10
 -17   0   9    0.10    0.10
 -17   0   9    0.10    0.10
 -17   0   9    0.00    0.10
 -16   0   9    0.00    0.10
 -16   0   9    0.00    0.10
 -16   0   9    0.00    0.10
 -16   0   9    0.00    0.10
  16   0  -9    0.00    0.10
  16   0  -9    0.00    0.10
  15   0  -9    0.10    0.10
 -15   0   9    0.00    0.10
 -15   0   9    0.00    0.10
  15   0  -9    0.00    0.10
 -15   0   9   -0.10    0.10
 -15   0   9    0.10    0.10
  14   0  -9    0.10    0.10
 -14   0   9    0.20    0.10
 -14   0   9    0.00    0.10
 -14   0   9    0.00    0.10
 -14   0   9    0.20    0.10
  14   0  -9    0.20    0.10
 -14   0   9    0.30    0.10
 -13   0   9    0.10    0.10
 -13   0   9    0.10    0.10
 -13   0   9    0.00    0.10
  13   0  -9    0.10    0.10
 -13   0   9    0.00    0.10
 -13   0   9    0.00    0.10
  12   0  -9    0.10    0.10
 -12   0   9    0.10    0.10
 -12   0   9    0.00    0.10
 -12   0   9    0.00    0.10
 -12   0   9    0.00    0.10
  11   0  -9   -0.20    0.20
 -11   0   9    0.10    0.10
 -11   0   9    0.00    0.10
 -11   0   9    0.00    0.10
 -11   0   9    0.20    0.10
  11   0  -9    0.00    0.10
  10   0  -9    0.00    0.10
 -10   0   9   -0.10    0.10
 -10   0   9    0.20    0.10
 -10   0   9    0.20    0.10
  10   0  -9    0.10    0.20
   9   0  -9    0.00    0.10
  -9   0   9    0.00    0.10
  -9   0   9    0.00    0.10
  -9   0   9    0.30    0.20
  -9   0   9    0.30    0.10
  -9   0   9    0.00    0.10
   9   0  -9    0.20    0.20
   8   0  -9    0.10    0.10
  -8   0   9    0.00    0.10
   8   0  -9    0.00    0.10
   7   0  -9    0.00    0.10
  -7   0   9    0.10    0.10
   6   0  -9   -0.10    0.10
  -6   0   9   -0.20    0.10
  -5   0   9    0.00    0.10
  -4   0   9   -1.50    0.10
  -3   0   9    0.20    0.10
  -2   0   9    0.20    0.10
  -1   0   9    0.00    0.10
   1   0  -9    0.00    0.10
   0   0   9    0.10    0.10
   0   0  -9    0.10    0.10
   1   0   9    0.20    0.20
  -1   0  -9    0.10    0.10
  -2   0  -9    0.00    0.10
   2   0   9    0.00    0.10
   2   0   9    0.20    0.10
   2   0   9   -0.10    0.10
   2   0   9    0.00    0.10
   3   0   9    0.20    0.20
   3   0   9    0.40    0.10
   3   0   9    0.00    0.10
   3   0   9    0.00    0.10
  -3   0  -9    0.10    0.10
  -3   0  -9    0.00    0.10
   4   0   9    0.10    0.20
   4   0   9    0.00    0.10
  -4   0  -9    0.10    0.10
   4   0   9    0.00    0.10
  -4   0  -9    0.20    0.10
   5   0   9    0.00    0.10
   5   0   9    0.00    0.10
  -5   0  -9    0.10    0.10
  -5   0  -9    0.00    0.10
  -6   0  -9   -0.10    0.10
  -6   0  -9    0.10    0.10
   6   0   9   -0.10    0.10
   6   0   9    0.50    0.10
  -7   0  -9    0.00    0.10
  -8   0  -9    0.10    0.10
  -9   0  -9    0.20    0.10
 -10   0  -9    0.00    0.10
 -18  -1   9    0.70    0.10
 -18   1   9    0.60    0.10
 -18   1   9    0.60    0.10
 -17  -1   9    4.30    0.20
  17  -1  -9    4.40    0.20
 -17  -1   9    4.10    0.20
  17  -1  -9    4.50    0.20
 -17   1   9    4.40    0.20
 -17   1   9    3.80    0.20
 -17   1   9    4.30    0.20
  17   1  -9    4.30    0.20
  17   1  -9    4.30    0.20
 -17   1   9    4.70    0.20
  16  -1  -9   32.90    1.00
  16  -1  -9   32.70    1.00
 -16  -1   9   32.80    1.00
 -16  -1   9   31.50    1.00
 -16   1   9   30.50    1.00
  16   1  -9   32.70    1.00
  16   1  -9   31.10    1.00
  16   1  -9   31.80    1.00
 -16   1   9   31.20    1.00
 -16   1   9   32.10    1.00
 -16   1   9   30.30    1.00
 -16   1   9   32.10    1.00
 -15  -1   9    8.20    0.30
 -15  -1   9    7.80    0.30
  15  -1  -9    7.40    0.30
  15  -1  -9    8.20    0.30
 -15  -1   9    8.20    0.40
 -15  -1   9    8.30    0.40
  15   1  -9    8.30    0.30
  15   1  -9    7.90    0.30
 -15   1   9    8.00    0.30
 -15   1   9    8.20    0.30
 -15   1   9    8.30    0.40
 -15   1   9    7.80    0.30
 -15   1   9    7.80    0.30
 -14  -1   9   53.09    1.60
 -14  -1   9   50.99    1.60
 -14  -1   9   50.89    1.60
 -14  -1   9   53.69    1.60
  14  -1  -9   52.19    1.60
 -14   1   9   48.70    1.60
 -14   1   9   53.19    1.60
 -14   1   9   53.29    1.60
  14   1  -9   54.29    1.60
 -14   1   9   51.39    1.60
  14   1  -9   49.30    1.60
 -14   1   9   51.29    1.60
  13  -1  -9   32.20    1.00
 -13  -1   9   33.40    1.10
 -13  -1   9   33.00    1.10
 -13  -1   9   32.10    1.00
 -13  -1   9   32.00    1.00
 -13   1   9   32.70    1.10
 -13   1   9   31.30    1.00
  13   1  -9   33.70    1.00
 -13   1   9   32.10    1.10
 -13   1   9   33.00    1.10
 -13   1   9   33.30    1.10
 -12  -1   9   81.19    2.50
 -12  -1   9   82.89    2.50
  12  -1  -9   79.09    2.40
 -12  -1   9   83.19    2.50
 -12   1   9   80.19    2.50
  12   1  -9   83.89    2.50
 -12   1   9   86.69    2.50
 -12   1   9   82.39    2.50
 -12   1   9   79.79    2.50
 -12   1   9   74.49    2.50
 -11  -1   9  218.78    6.20
 -11  -1   9  206.18    6.20
  11  -1  -9  193.28    6.40
 -11  -1   9  215.38    6.20
 -11  -1   9  201.98    6.20
 -11   1   9  208.58    6.20
 -11   1   9  210.98    6.20
 -11   1   9  217.08    6.20
 -11   1   9  208.18    6.20
  11   1  -9  205.48    6.40
  11   1  -9  211.88    6.20
 -10  -1   9   27.00    0.90
 -10  -1   9   26.20    0.80
  10  -1  -9   24.60    1.00
 -10  -1   9   26.40    0.80
 -10  -1   9   25.30    0.90
  10   1  -9   25.90    0.80
 -10   1   9   26.20    0.90
 -10   1   9   27.20    0.90
 -10   1   9   26.20    0.80
 -10   1   9   26.10    0.80
  10   1  -9   25.20    1.00
  -9  -1   9   50.59    1.60
   9  -1  -9   49.80    1.70
  -9  -1   9   49.50    1.50
  -9  -1   9   49.90    1.60
  -9  -1   9   48.40    1.50
  -9   1   9   49.99    1.50
   9   1  -9   49.00    1.70
  -9   1   9   49.90    1.50
  -9   1   9   51.09    1.60
  -9   1   9   49.80    1.50
   9   1  -9   50.59    1.50
   8  -1  -9   36.90    1.20
   8  -1  -9   37.80    1.30
  -8  -1   9   37.40    1.20
  -8  -1   9   37.60    1.20
  -8  -1   9   38.90    1.20
  -8  -1   9   39.00    1.30
  -8  -1   9   37.30    1.20
   8   1  -9   39.60    1.30
  -8   1   9   39.40    1.20
  -8   1   9   37.40    1.30
  -8   1   9   37.20    1.20
   8   1  -9   37.10    1.20
   8   1  -9   36.40    1.30
  -7  -1   9   17.10    0.70
   7   1  -9   17.30    0.60
   7   1  -9   17.20    0.70
  -7   1   9   17.70    0.70
  -6  -1   9  512.35   14.90
  -6   1   9  513.85   14.90
   6   1  -9  476.65   14.80
   6   1  -9  515.85   15.00
  -5  -1   9   65.79    2.10
   5   1  -9   63.09    2.10
   5   1  -9   65.59    1.90
  -5   1   9   64.09    2.10
  -4  -1   9  353.46   10.30
   4   1  -9  336.87   10.20
  -4   1   9  348.97   10.30
  -3  -1   9  265.37    7.70
  -3   1   9  263.37    7.70
   3   1  -9  237.78    7.50
  -2  -1   9  354.46   10.50
   2   1  -9  340.77   10.30
  -2   1   9  360.46   10.50
  -1  -1   9   90.19    2.80
  -1   1   9   90.39    2.80
   1   1  -9   83.49    2.60
   0  -1   9  178.08    5.40
   0  -1  -9  172.38    5.20
   0   1  -9  177.78    5.20
   0   1   9  181.68    5.40
   1  -1   9   51.79    1.60
   1  -1   9   54.09    1.80
   1  -1   9   53.99    1.60
  -1  -1  -9   54.79    1.60
   1   1   9   54.59    1.60
  -1   1  -9   52.49    1.60
   1   1   9   52.09    1.60
   1   1   9   52.49    1.80
   1   1   9   52.39    1.60
  -1   1  -9   49.50    1.60
  -2  -1  -9   81.79    2.40
   2  -1   9   80.39    2.60
   2  -1   9   79.69    2.40
   2  -1   9   78.39    2.40
  -2   1  -9   79.49    2.40
  -2   1  -9   73.29    2.40
   2   1   9   79.19    2.60
   2   1   9   80.59    2.40
   2   1   9   78.29    2.40
   2   1   9   80.49    2.40
  -2   1  -9   75.99    2.40
   3  -1   9    0.70    0.20
   3  -1   9    0.60    0.10
   3  -1   9    0.30    0.10
  -3  -1  -9    0.40    0.10
  -3   1  -9    0.20    0.10
   3   1   9    0.40    0.10
   3   1   9    0.50    0.10
  -3   1  -9    0.40    0.10
   3   1   9    0.40    0.20
   4  -1   9   17.20    0.60
  -4  -1  -9   17.70    0.60
   4  -1   9   16.80    0.80
  -4   1  -9   17.10    0.60
   4   1   9   17.20    0.60
   4   1   9   17.10    0.80
  -4   1  -9   17.10    0.60
   4   1   9   17.70    0.60
   4   1   9   18.20    0.60
  -5  -1  -9   11.10    0.40
   5  -1   9   10.70    0.40
  -5  -1  -9   11.40    0.50
  -5   1  -9   11.30    0.40
   5   1   9   11.10    0.40
   5   1   9   11.40    0.50
  -5   1  -9   11.40    0.40
  -6  -1  -9   32.70    1.00
  -6  -1  -9   29.20    1.00
   6  -1   9   30.90    1.00
  -6   1  -9   30.30    1.00
   6   1   9   33.60    1.10
  -6   1  -9   31.50    1.00
   6   1   9   31.80    1.00
  -7  -1  -9    2.50    0.20
  -7   1  -9    2.80    0.20
  -8  -1  -9    4.50    0.30
  -8   1  -9    4.50    0.20
  -9  -1  -9    3.60    0.20
  -9   1  -9    3.60    0.20
 -10  -1  -9    0.50    0.10
 -10   1  -9    0.50    0.10
 -11  -1  -9    4.60    0.20
  17  -2  -9    7.10    0.30
 -17  -2   9    7.10    0.30
 -17   2   9    7.10    0.30
 -17   2   9    7.20    0.30
  17   2  -9    6.70    0.30
 -16  -2   9   11.50    0.40
  16  -2  -9   11.30    0.40
 -16   2   9   12.00    0.40
 -16   2   9   11.90    0.40
 -16   2   9   11.80    0.40
 -16   2   9   11.10    0.40
  16   2  -9   11.20    0.40
  15  -2  -9    2.60    0.20
 -15  -2   9    2.60    0.20
  15   2  -9    2.70    0.20
 -15   2   9    2.50    0.20
 -15   2   9    2.40    0.20
 -15   2   9    2.30    0.20
 -15   2   9    2.40    0.20
 -14  -2   9   48.20    1.50
 -14  -2   9   48.50    1.50
  14  -2  -9   47.30    1.50
 -14   2   9   46.20    1.50
  14   2  -9   49.60    1.50
 -14   2   9   49.10    1.50
 -14   2   9   50.39    1.50
 -14   2   9   48.80    1.50
 -13  -2   9   10.80    0.40
  13  -2  -9   10.80    0.40
 -13  -2   9   10.90    0.40
 -13   2   9   10.30    0.40
  13   2  -9   10.70    0.40
 -13   2   9   10.80    0.40
 -13   2   9   10.70    0.40
  13   2  -9   11.10    0.50
 -13   2   9   10.90    0.40
 -12  -2   9    0.80    0.10
 -12  -2   9    0.90    0.10
 -12   2   9    0.90    0.10
  12   2  -9    0.80    0.10
  12   2  -9    0.80    0.10
 -12   2   9    0.90    0.10
 -12   2   9    0.90    0.10
 -12   2   9    0.70    0.10
 -11  -2   9   26.40    0.90
 -11  -2   9   28.50    0.90
 -11  -2   9   24.80    0.90
  11   2  -9   25.20    0.80
 -11   2   9   24.80    0.90
 -11   2   9   26.20    0.90
 -11   2   9   25.60    0.90
 -11   2   9   28.00    0.90
  11   2  -9   28.00    0.90
 -10  -2   9   99.69    3.10
 -10  -2   9  102.79    3.10
  10  -2  -9   96.29    3.30
 -10  -2   9  104.89    3.10
  10   2  -9  103.09    3.10
 -10   2   9  101.89    3.10
  10   2  -9  102.99    3.10
 -10   2   9  102.59    3.10
 -10   2   9  103.79    3.10
  -9  -2   9   54.29    1.60
  -9  -2   9   53.59    1.60
  -9  -2   9   52.39    1.60
   9  -2  -9   49.80    1.80
  -9   2   9   53.69    1.60
  -9   2   9   52.19    1.60
  -9   2   9   51.49    1.60
   9   2  -9   52.49    1.60
   9   2  -9   53.79    1.70
  -8  -2   9   38.90    1.20
  -8  -2   9   35.50    1.20
  -8  -2   9   37.90    1.20
  -8  -2   9   37.80    1.20
   8  -2  -9   36.50    1.30
   8   2  -9   38.00    1.20
  -8   2   9   35.10    1.20
  -8   2   9   38.80    1.20
   8   2  -9   38.50    1.20
  -8   2   9   34.80    1.20
  -7  -2   9    0.60    0.10
  -7  -2   9    0.60    0.10
   7  -2  -9    0.60    0.20
  -7  -2   9    0.60    0.10
  -7   2   9    0.50    0.10
  -7   2   9    0.60    0.10
   7   2  -9    0.70    0.10
   7   2  -9    0.60    0.10
  -7   2   9    0.50    0.10
  -7   2   9    0.60    0.10
  -6  -2   9    0.80    0.10
  -6   2   9    0.50    0.10
   6   2  -9    0.90    0.20
   6   2  -9    0.50    0.10
   6   2  -9    0.60    0.10
  -5  -2   9  156.48    4.90
  -5  -2   9  160.18    4.90
  -5  -2   9  169.98    5.10
   5   2  -9  163.28    5.00
  -5   2   9  163.28    5.00
   5   2  -9  168.88    4.80
  -4  -2   9   14.00    0.60
  -4  -2   9   13.30    0.50
  -4  -2   9   13.60    0.50
  -4   2   9   15.00    0.60
   4   2  -9   14.40    0.50
  -3  -2   9   71.19    2.20
  -3  -2   9   66.99    2.10
  -3  -2   9   67.99    2.10
   3   2  -9   68.29    2.10
   3   2  -9   71.09    2.10
  -3   2   9   72.99    2.20
  -2  -2   9   14.30    0.60
  -2  -2   9   14.70    0.50
  -2  -2   9   14.20    0.50
  -2  -2   9   14.60    0.50
  -2  -2   9   15.00    0.50
  -2   2   9   14.80    0.60
   2   2  -9   15.20    0.50
  -2   2   9   15.10    0.50
  -2   2   9   14.60    0.50
   2   2  -9   14.50    0.50
  -1  -2   9   12.30    0.40
  -1  -2   9   10.60    0.40
  -1  -2   9   10.40    0.50
  -1  -2   9   10.50    0.40
   1   2  -9   11.00    0.40
   1   2  -9   12.00    0.40
   1   2  -9   10.30    0.40
  -1   2   9   10.80    0.40
  -1   2   9   11.80    0.40
  -1   2   9   11.80    0.40
  -1   2   9   10.90    0.50
   0  -2   9  109.99    3.30
   0  -2   9  110.29    3.30
   0  -2   9  108.39    3.30
   0  -2   9  106.59    3.40
   0  -2  -9  105.49    3.20
   0   2   9  108.99    3.40
   0   2  -9  109.89    3.30
   0   2  -9  108.39    3.30
   0   2   9  110.19    3.30
   0   2   9  113.29    3.30
   0   2   9  110.99    3.30
   1  -2   9  144.89    4.30
  -1  -2  -9  143.19    4.20
   1  -2   9  141.69    4.50
   1  -2   9  142.79    4.30
   1   2   9  144.79    4.40
   1   2   9  144.59    4.30
  -1   2  -9  137.39    4.30
   1   2   9  145.39    4.30
  -1   2  -9  141.89    4.30
   1   2   9  144.89    4.30
   2  -2   9    5.20    0.20
  -2  -2  -9    5.50    0.20
   2   2   9    5.20    0.20
  -2   2  -9    5.00    0.30
   2   2   9    5.20    0.40
   2   2   9    5.30    0.30
  -2   2  -9    4.90    0.20
   2   2   9    5.30    0.30
   3  -2   9  277.97    8.30
  -3  -2  -9  289.37    8.30
   3  -2   9  260.87    8.30
  -3   2  -9  282.47    8.30
   3   2   9  282.07    8.30
   3   2   9  281.67    8.30
   3   2   9  285.67    8.30
  -3   2  -9  292.67    8.30
  -4  -2  -9   27.80    0.90
   4  -2   9   26.50    0.90
  -4  -2  -9   27.40    0.90
   4   2   9   27.30    0.90
  -4   2  -9   26.60    0.90
   4   2   9   26.80    0.90
   4   2   9   27.20    0.90
  -5  -2  -9    2.90    0.20
   5  -2   9    3.00    0.20
  -5  -2  -9    3.10    0.20
  -5   2  -9    2.80    0.20
   5   2   9    3.00    0.20
  -5   2  -9    2.70    0.20
   5   2   9    2.70    0.30
  -6  -2  -9    4.20    0.20
   6  -2   9    4.30    0.20
  -6  -2  -9    4.70    0.30
   6   2   9    4.40    0.20
  -6   2  -9    4.30    0.30
  -6   2  -9    4.40    0.20
   7  -2   9   13.40    0.50
  -7  -2  -9   13.70    0.50
  -7   2  -9   13.10    0.50
  -7   2  -9   13.00    0.50
  -8  -2  -9    6.00    0.30
  -8   2  -9    6.30    0.30
  -8   2  -9    6.20    0.30
  -9  -2  -9  159.98    4.70
  -9   2  -9  149.88    4.60
  -9   2  -9  160.68    4.70
 -10  -2  -9  107.19    3.20
 -10   2  -9  104.59    3.10
 -16   3   9   30.30    0.90
 -16   3   9   29.60    0.90
  15  -3  -9    6.60    0.20
 -15   3   9    6.20    0.30
 -15   3   9    6.60    0.30
 -15   3   9    6.30    0.30
  15   3  -9    6.20    0.30
 -15   3   9    6.30    0.30
  14  -3  -9   18.10    0.60
  14   3  -9   18.30    0.60
 -14   3   9   18.50    0.60
 -14   3   9   17.90    0.60
 -14   3   9   17.80    0.60
 -14   3   9   18.60    0.60
 -13   3   9    2.80    0.20
  13   3  -9    2.40    0.20
 -13   3   9    2.40    0.20
 -13   3   9    2.50    0.20
 -13   3   9    2.80    0.20
 -12   3   9  148.79    4.50
  12   3  -9  157.28    4.60
 -12   3   9  152.38    4.50
 -12   3   9  152.98    4.50
 -12   3   9  147.09    4.50
  11   3  -9    7.70    0.40
 -11   3   9    7.30    0.30
 -11   3   9    7.30    0.30
 -11   3   9    7.80    0.30
 -11   3   9    7.70    0.30
 -10   3   9  301.27    8.80
 -10   3   9  300.07    8.80
  10   3  -9  303.37    8.80
 -10   3   9  283.57    8.80
  -9   3   9    4.60    0.30
   9   3  -9    5.60    0.30
  -8  -3   9   65.29    2.00
   8   3  -9   64.49    2.00
  -7  -3   9    8.20    0.40
   7   3  -9    8.80    0.40
   7   3  -9    8.10    0.30
  -6  -3   9   40.30    1.30
  -6  -3   9   39.40    1.20
   6   3  -9   39.90    1.30
   6   3  -9   38.80    1.20
  -5  -3   9   91.19    2.70
  -5  -3   9   89.59    2.70
  -5   3   9   88.69    2.70
   5   3  -9   90.19    2.70
  -5   3   9   89.39    2.70
   5   3  -9   88.59    2.70
  -4  -3   9    2.00    0.20
  -4  -3   9    2.10    0.20
  -4   3   9    2.10    0.20
   4   3  -9    2.90    0.20
   4   3  -9    1.90    0.20
  -4   3   9    2.10    0.20
  -3  -3   9   29.20    0.90
  -3  -3   9   30.00    1.00
  -3  -3   9   29.20    1.00
   3   3  -9   29.30    0.90
  -3   3   9   29.00    1.00
   3   3  -9   29.50    0.90
  -3   3   9   29.40    0.90
   3   3  -9   29.50    1.00
  -2  -3   9   22.70    0.80
  -2  -3   9   22.40    0.70
  -2   3   9   22.60    0.70
   2   3  -9   22.50    0.70
  -2   3   9   23.30    0.80
   2   3  -9   22.50    0.80
   2   3  -9   23.40    0.70
  -1  -3   9   12.70    0.50
  -1  -3   9   11.50    0.40
  -1   3   9   12.40    0.50
  -1   3   9   13.10    0.40
   1   3  -9   11.50    0.50
   1   3  -9   12.00    0.40
   1   3  -9   12.10    0.40
   0  -3   9   56.09    1.80
   0  -3   9   57.89    1.80
   0  -3  -9   54.49    1.70
   0   3   9   57.39    1.80
   0   3  -9   58.89    1.80
   0   3  -9   59.09    1.80
   0   3   9   58.89    1.80
  -1  -3  -9   29.50    0.90
   1  -3   9   29.40    1.00
   1   3   9   29.30    1.00
   1   3   9   28.20    0.90
  -1   3  -9   29.30    1.00
   1   3   9   30.30    1.00
  -1   3  -9   29.20    1.00
   2  -3   9  752.02   23.10
  -2  -3  -9  800.72   23.10
   2  -3   9  791.02   23.10
  -2  -3  -9  742.03   23.10
   2   3   9  807.52   23.10
   2   3   9  788.82   23.10
  -2   3  -9  790.22   23.10
  -2   3  -9  807.12   23.10
   2   3   9  799.22   23.10
   3  -3   9   47.70    1.50
  -3  -3  -9   46.40    1.50
  -3  -3  -9   45.70    1.50
   3   3   9   47.90    1.50
   3   3   9   47.20    1.50
  -3   3  -9   47.70    1.50
  -3   3  -9   47.70    1.50
   3   3   9   47.80    1.50
  -4  -3  -9  171.18    5.20
   4  -3   9  175.88    5.10
  -4  -3  -9  171.88    5.10
   4   3   9  170.28    5.10
  -4   3  -9  172.98    5.20
   4   3   9  173.78    5.20
  -4   3  -9  174.88    5.20
  -5  -3  -9    1.70    0.10
  -5  -3  -9    1.70    0.20
   5   3   9    1.70    0.20
  -5   3  -9    1.70    0.20
  -5   3  -9    1.80    0.20
   5   3   9    1.80    0.20
   6  -3   9   31.10    1.00
  -6  -3  -9   31.00    1.00
  -6  -3  -9   29.60    1.00
  -6   3  -9   31.60    1.00
  -6   3  -9   32.70    1.00
   6   3   9   30.80    1.00
  -7  -3  -9   19.00    0.70
  -7   3  -9   19.50    0.70
  -7   3  -9   19.20    0.60
  -8  -3  -9   22.70    0.70
  -8   3  -9   22.00    0.70
  -8   3  -9   23.30    0.70
  -9  -3  -9    2.40    0.10
  -9   3  -9    2.30    0.10
  -9   3  -9    2.70    0.10
 -13   4   9   91.99    2.80
  13   4  -9   94.89    2.80
 -13   4   9   93.39    2.80
 -12   4   9    1.40    0.10
 -12   4   9    1.30    0.10
  12   4  -9    1.30    0.10
 -11   4   9   42.80    1.40
  11   4  -9   46.80    1.40
 -11   4   9   43.90    1.40
 -11   4   9   44.30    1.40
  10   4  -9  259.27    7.40
 -10   4   9  240.08    7.30
 -10   4   9  247.78    7.30
 -10   4   9  246.78    7.30
  -9  -4   9  124.29    3.70
  -9   4   9  118.99    3.70
   9   4  -9  125.79    3.70
  -9   4   9  123.09    3.70
  -8  -4   9   29.50    1.00
  -8   4   9   28.70    0.90
   8   4  -9   29.80    1.00
  -8   4   9   28.10    0.90
  -7  -4   9  196.98    5.80
  -7   4   9  186.98    5.70
   7   4  -9  196.98    5.80
  -6  -4   9   16.90    0.60
   6   4  -9   16.90    0.60
  -6   4   9   15.90    0.60
  -6   4   9   16.00    0.50
  -5  -4   9    6.10    0.30
  -5  -4   9    6.20    0.30
  -5   4   9    6.10    0.30
   5   4  -9    6.60    0.30
  -5   4   9    5.60    0.30
  -5   4   9    6.10    0.30
  -4  -4   9    7.40    0.40
  -4  -4   9    7.60    0.30
  -4   4   9    7.20    0.30
  -4   4   9    7.50    0.30
   4   4  -9    7.70    0.30
  -4   4   9    7.00    0.40
  -3  -4   9   77.59    2.40
  -3  -4   9   82.49    2.40
   3   4  -9   80.99    2.40
   3   4  -9   76.59    2.40
  -3   4   9   76.19    2.40
  -3   4   9   78.19    2.40
  -3   4   9   78.19    2.40
  -2  -4   9   62.19    1.90
  -2  -4   9   60.59    1.90
  -2   4   9   61.19    1.90
   2   4  -9   61.79    1.90
  -2   4   9   58.49    1.80
  -2   4   9   60.99    1.90
   2   4  -9   59.39    1.90
   1  -4  -9  132.49    3.90
  -1  -4   9  134.59    3.90
  -1  -4   9  132.59    4.00
  -1   4   9  124.79    3.90
  -1   4   9  129.79    3.90
   1   4  -9  132.39    3.90
  -1   4   9  136.09    4.00
   1   4  -9  131.29    4.00
   0  -4   9  122.99    3.60
   0  -4  -9  120.89    3.60
   0  -4   9  121.49    3.60
   0   4   9  118.99    3.60
   0   4  -9  120.29    3.60
   0   4   9  114.79    3.60
   0   4  -9  118.39    3.60
   0   4   9  124.29    3.70
   1  -4   9  244.68    7.40
   1  -4   9  253.67    7.30
  -1  -4  -9  250.37    7.30
   1   4   9  242.28    7.30
  -1   4  -9  245.88    7.30
   1   4   9  248.68    7.30
   1   4   9  256.17    7.40
  -1   4  -9  245.58    7.40
   2  -4   9  270.77    7.60
  -2  -4  -9  253.87    7.60
   2  -4   9  249.18    7.70
  -2   4  -9  270.37    7.60
   2   4   9  255.97    7.60
   2   4   9  268.97    7.70
   2   4   9  251.87    7.60
  -2   4  -9  246.68    7.60
  -3  -4  -9    7.40    0.30
   3  -4   9    8.10    0.30
  -3   4  -9    8.00    0.30
   3   4   9    7.80    0.40
   3   4   9    7.50    0.30
  -3   4  -9    7.20    0.30
   4  -4   9   17.70    0.60
  -4  -4  -9   16.90    0.60
  -4   4  -9   17.60    0.60
  -4   4  -9   18.20    0.60
   4   4   9   18.00    0.60
   4   4   9   17.20    0.60
  -5  -4  -9   17.70    0.60
   5  -4   9   19.20    0.60
  -5   4  -9   18.50    0.60
   5   4   9   18.60    0.60
   5   4   9   18.50    0.60
  -5   4  -9   18.50    0.60
   6  -4   9   21.50    0.70
  -6   4  -9   21.70    0.70
  -6   4  -9   20.90    0.70
  -7   4  -9    0.00    0.10
  -7   4  -9   -0.10    0.10
  10   5  -9    0.40    0.10
  -9  -5   9    4.80    0.20
  -9   5   9    4.90    0.20
  -9   5   9    4.70    0.20
   9   5  -9    4.90    0.20
  -8  -5   9    1.50    0.20
   8   5  -9    1.70    0.20
  -8   5   9    1.60    0.10
  -7  -5   9    3.30    0.20
  -7   5   9    3.00    0.20
   7   5  -9    3.00    0.20
  -6  -5   9    5.10    0.30
  -6   5   9    4.50    0.20
  -6   5   9    4.80    0.20
   6   5  -9    5.00    0.20
  -5  -5   9   13.80    0.50
  -5  -5   9   14.10    0.50
   5   5  -9   13.50    0.50
  -5   5   9   13.10    0.50
  -5   5   9   13.40    0.50
  -4  -5   9   18.00    0.60
  -4  -5   9   17.80    0.60
  -4   5   9   16.10    0.60
   4   5  -9   19.20    0.60
  -4   5   9   17.80    0.60
  -4   5   9   18.60    0.60
  -3  -5   9   27.00    0.90
   3  -5  -9   26.90    0.80
  -3  -5   9   26.60    0.80
  -3   5   9   26.40    0.90
  -3   5   9   27.50    0.80
  -3   5   9   25.00    0.90
   3   5  -9   28.60    0.90
   2  -5  -9   33.60    1.00
  -2  -5   9   33.10    1.10
  -2  -5   9   34.10    1.10
  -2   5   9   32.80    1.10
  -2   5   9   35.10    1.10
   2   5  -9   34.20    1.10
  -2   5   9   33.20    1.00
  -1  -5   9   51.79    1.60
  -1  -5   9   53.49    1.60
   1  -5  -9   50.99    1.60
  -1   5   9   53.89    1.60
  -1   5   9   51.69    1.60
  -1   5   9   52.39    1.60
   1   5  -9   53.29    1.60
   0  -5   9   33.30    1.00
   0  -5   9   32.60    1.10
   0  -5  -9   33.00    1.00
   0   5  -9   34.30    1.10
   0   5   9   33.30    1.00
   0   5   9   32.60    1.10
   0   5   9   32.20    1.00
   1  -5   9    9.40    0.30
   1  -5   9    8.50    0.40
  -1  -5  -9    9.00    0.30
  -1   5  -9    9.20    0.40
   1   5   9    9.20    0.30
   1   5   9    9.10    0.40
   1   5   9    9.40    0.30
   2  -5   9    2.70    0.20
  -2   5  -9    3.10    0.20
   2   5   9    3.10    0.20
   2   5   9    2.80    0.20
  -2   5  -9    2.90    0.20
   3  -5   9    5.40    0.20
  -3  -5  -9    5.10    0.20
   3   5   9    5.20    0.20
  -3   5  -9    5.00    0.20
   4  -5   9   22.10    0.70
   4   5   9   20.10    0.70
 -18   0  10   19.10    0.60
  18   0 -10   18.90    0.60
 -18   0  10   17.60    0.60
 -17   0  10    5.80    0.20
  17   0 -10    6.50    0.20
 -17   0  10    6.20    0.30
 -17   0  10    5.80    0.20
 -17   0  10    6.10    0.30
 -16   0  10   14.60    0.50
 -16   0  10   14.70    0.50
  16   0 -10   15.60    0.50
 -16   0  10   14.70    0.50
 -16   0  10   14.40    0.50
  15   0 -10    2.70    0.20
 -15   0  10    2.50    0.20
 -15   0  10    2.70    0.20
 -15   0  10    2.60    0.20
 -15   0  10    2.80    0.20
 -14   0  10    0.50    0.10
 -14   0  10    0.40    0.10
 -14   0  10    0.50    0.10
  14   0 -10    0.30    0.10
  13   0 -10   96.19    2.90
 -13   0  10   98.19    3.00
 -13   0  10   93.79    2.90
 -13   0  10   96.89    2.90
 -13   0  10   97.19    2.90
 -12   0  10   13.40    0.50
 -12   0  10   13.10    0.50
 -12   0  10   13.10    0.50
 -12   0  10   14.00    0.50
  12   0 -10   13.20    0.50
  11   0 -10    4.00    0.20
  11   0 -10    4.10    0.40
 -11   0  10    4.40    0.30
 -11   0  10    4.30    0.20
 -11   0  10    4.50    0.20
 -11   0  10    3.90    0.30
 -10   0  10   32.90    1.10
  10   0 -10   30.90    1.00
  10   0 -10   32.50    1.20
 -10   0  10   33.30    1.10
 -10   0  10   35.20    1.10
 -10   0  10   33.50    1.10
  -9   0  10  250.87    7.40
  -9   0  10  250.07    7.60
   9   0 -10  241.78    7.40
   9   0 -10  249.08    7.60
  -9   0  10  265.27    7.40
  -9   0  10  252.17    7.40
  -9   0  10  250.77    7.40
  -8   0  10  270.27    8.10
  -8   0  10  278.17    8.30
   8   0 -10  279.67    8.30
  -8   0  10  275.07    8.10
  -8   0  10  272.67    8.10
  -7   0  10  445.26   12.90
   7   0 -10  436.16   12.90
  -7   0  10  428.86   13.00
  -7   0  10  444.66   12.90
  -7   0  10  430.36   12.80
  -6   0  10   67.29    2.20
  -5   0  10  176.98    5.40
   4   0 -10  356.76   11.10
  -4   0  10  399.36   11.30
   3   0 -10   21.90    0.70
   2   0 -10    1.30    0.10
  -2   0  10    1.40    0.30
   1   0 -10  115.59    3.40
  -1   0  10  117.49    3.60
   0   0 -10    5.70    0.30
   0   0  10    6.00    0.30
   0   0  10    6.10    0.40
   0   0 -10    6.10    0.20
   0   0  10    6.20    0.30
   0   0  10    6.30    0.30
  -1   0 -10  186.38    5.30
   1   0  10  173.88    5.40
   1   0  10  173.98    5.30
   1   0  10  182.58    5.30
  -1   0 -10  172.18    5.30
   1   0  10  180.08    5.30
   1   0  10  174.98    5.30
   2   0  10   93.29    2.80
   2   0  10   92.89    2.80
   2   0  10   90.59    3.00
  -2   0 -10   89.29    2.80
   2   0  10   92.89    2.80
  -2   0 -10   93.29    2.70
   3   0  10  255.87    7.40
  -3   0 -10  242.38    7.40
   3   0  10  239.88    7.60
  -3   0 -10  258.67    7.40
   3   0  10  249.78    7.40
   3   0  10  251.57    7.40
  -4   0 -10   60.29    1.90
  -4   0 -10   59.89    1.90
   4   0  10   63.79    1.90
   4   0  10   64.09    1.90
   5   0  10   23.60    0.80
   5   0  10   22.40    0.70
  -5   0 -10   22.90    0.80
  -5   0 -10   22.40    0.80
  -6   0 -10  575.44   16.80
   6   0  10  569.84   16.80
  -7   0 -10    9.90    0.40
  -8   0 -10    5.30    0.30
  -9   0 -10    3.50    0.20
 -10   0 -10   10.40    0.40
 -18  -1  10    2.70    0.20
 -18   1  10    1.80    0.20
  17  -1 -10    5.10    0.20
 -17  -1  10    4.80    0.20
 -17  -1  10    4.70    0.20
 -17   1  10    4.50    0.20
 -17   1  10    4.80    0.20
 -17   1  10    4.60    0.20
 -17   1  10    4.90    0.20
 -16  -1  10    0.80    0.10
  16  -1 -10    0.90    0.10
 -16  -1  10    0.90    0.10
 -16  -1  10    0.80    0.10
 -16   1  10    0.90    0.10
  16   1 -10    0.70    0.10
 -16   1  10    0.60    0.10
 -16   1  10    0.80    0.10
  16   1 -10    1.00    0.10
 -16   1  10    0.90    0.10
  15  -1 -10    1.50    0.10
 -15  -1  10    1.30    0.20
 -15  -1  10    1.30    0.10
 -15  -1  10    1.70    0.10
 -15  -1  10    1.20    0.10
 -15   1  10    1.30    0.10
  15   1 -10    1.50    0.20
 -15   1  10    1.30    0.10
 -15   1  10    1.30    0.10
  15   1 -10    1.30    0.10
 -15   1  10    1.60    0.20
 -14  -1  10    0.00    0.10
  14  -1 -10    0.00    0.10
 -14  -1  10    0.00    0.10
 -14  -1  10    0.20    0.10
 -14  -1  10    0.40    0.10
 -14   1  10    0.00    0.10
  14   1 -10    0.00    0.10
 -14   1  10    0.00    0.10
 -14   1  10    0.10    0.10
 -14   1  10    0.10    0.10
 -13  -1  10    0.90    0.10
 -13  -1  10    0.50    0.10
  13  -1 -10    0.50    0.10
 -13  -1  10    0.50    0.10
 -13  -1  10    0.60    0.10
 -13   1  10    0.50    0.10
 -13   1  10    0.70    0.10
 -13   1  10    0.60    0.10
  13   1 -10    0.60    0.10
 -12  -1  10   32.70    1.10
 -12  -1  10   32.20    1.00
 -12  -1  10   32.00    1.10
  12  -1 -10   30.30    1.00
 -12  -1  10   32.20    1.00
 -12   1  10   32.10    1.00
 -12   1  10   31.40    1.00
  12   1 -10   31.50    1.00
 -12   1  10   30.80    1.00
 -12   1  10   33.00    1.10
 -11  -1  10    0.30    0.10
 -11  -1  10    0.30    0.10
 -11  -1  10    0.30    0.10
 -11   1  10    0.20    0.10
 -11   1  10    0.30    0.10
  11   1 -10    0.20    0.10
 -11   1  10    0.20    0.10
 -11   1  10    0.30    0.10
 -10  -1  10 1045.50   29.70
 -10  -1  10 1036.90   29.70
  10  -1 -10  961.30   29.80
 -10  -1  10 1017.00   29.70
 -10  -1  10  984.20   29.70
 -10   1  10 1054.29   29.70
  10   1 -10  992.60   29.90
  10   1 -10 1013.60   29.60
 -10   1  10 1026.10   29.70
 -10   1  10 1034.60   29.70
 -10   1  10  966.90   29.70
   9  -1 -10  415.16   12.40
  -9  -1  10  419.46   12.20
  -9  -1  10  409.36   12.20
  -9  -1  10  426.36   12.20
  -9  -1  10  405.26   12.40
  -9  -1  10  412.06   12.20
  -9   1  10  416.66   12.20
  -9   1  10  415.66   12.40
  -9   1  10  416.86   12.20
  -9   1  10  408.76   12.20
   9   1 -10  413.16   12.40
   9   1 -10  422.56   12.20
  -9   1  10  421.36   12.20
  -8  -1  10   10.10    0.40
  -8  -1  10   10.00    0.40
   8  -1 -10   10.40    0.50
  -8  -1  10   10.20    0.40
  -8  -1  10   10.60    0.40
  -8  -1  10   10.10    0.50
   8   1 -10   10.20    0.40
  -8   1  10   10.10    0.40
  -8   1  10   10.40    0.40
  -8   1  10   10.00    0.50
  -8   1  10   10.70    0.40
   8   1 -10   10.40    0.50
  -7  -1  10   11.50    0.40
  -7  -1  10   11.70    0.40
  -7  -1  10   11.50    0.40
  -7  -1  10   11.90    0.60
  -7   1  10   11.60    0.60
  -7   1  10   11.80    0.40
   7   1 -10   11.70    0.40
  -7   1  10   11.80    0.40
   7   1 -10   11.10    0.40
  -7   1  10   11.40    0.40
  -6  -1  10  739.33   21.90
  -6  -1  10  745.63   22.10
  -6  -1  10  726.93   21.90
   6   1 -10  781.92   21.90
   6   1 -10  747.03   22.10
  -6   1  10  749.13   22.10
  -5  -1  10   11.20    0.50
  -5   1  10   11.50    0.50
   5   1 -10   11.20    0.40
  -4  -1  10   10.30    0.50
  -4   1  10    9.90    0.50
   4   1 -10   10.00    0.30
  -3  -1  10   57.49    1.90
   3   1 -10   55.09    1.70
  -3   1  10   56.69    1.90
  -2  -1  10  404.76   12.20
  -2  -1  10  397.26   12.20
  -2  -1  10  428.16   12.30
  -2   1  10  428.96   12.30
   2   1 -10  407.26   12.10
  -1  -1  10   45.80    1.40
  -1  -1  10   44.20    1.40
   1  -1 -10   43.70    1.40
  -1  -1  10   46.40    1.60
  -1  -1  10   44.50    1.40
  -1  -1  10   44.90    1.40
  -1   1  10   45.10    1.40
  -1   1  10   45.40    1.60
  -1   1  10   45.10    1.40
   1   1 -10   44.60    1.40
  -1   1  10   46.10    1.40
   1   1 -10   44.20    1.40
   0  -1  10  133.49    4.00
   0  -1  10  122.39    4.00
   0  -1  10  141.59    3.90
   0  -1  10  126.69    4.00
   0  -1 -10  134.89    3.90
   0  -1  10  137.59    4.10
   0   1  10  132.79    4.10
   0   1 -10  132.69    4.00
   0   1  10  133.99    4.00
   0   1  10  134.79    3.90
   0   1 -10  130.29    3.90
   0   1  10  135.19    4.00
   0   1 -10  130.29    3.90
   1  -1  10    0.80    0.10
   1  -1  10    0.60    0.10
  -1  -1 -10    0.50    0.10
   1  -1  10    0.90    0.20
   1  -1  10    0.60    0.10
  -1   1 -10    0.60    0.10
   1   1  10    0.50    0.20
   1   1  10    0.60    0.10
   1   1  10    0.70    0.10
  -1   1 -10    0.60    0.10
  -1   1 -10    0.90    0.10
  -2  -1 -10   11.00    0.40
   2  -1  10   10.40    0.40
   2  -1  10   10.40    0.40
   2  -1  10   10.00    0.50
   2  -1  10   11.30    0.60
   2   1  10   10.60    0.40
   2   1  10   10.10    0.40
   2   1  10   10.50    0.40
  -2   1 -10   10.00    0.40
  -2   1 -10   10.90    0.40
  -2   1 -10   10.00    0.40
   3  -1  10   26.50    0.90
   3  -1  10   26.60    0.90
   3  -1  10   26.00    1.10
  -3  -1 -10   27.10    0.90
   3   1  10   27.30    0.90
   3   1  10   28.20    0.90
   3   1  10   27.30    0.90
  -3   1 -10   25.60    0.90
  -3   1 -10   27.00    0.90
   3   1  10   25.80    1.10
  -4  -1 -10    3.60    0.20
   4  -1  10    2.80    0.20
   4   1  10    3.00    0.20
  -4   1 -10    2.80    0.20
   4   1  10    2.90    0.30
  -5  -1 -10  120.29    3.60
   5  -1  10  123.19    3.60
  -5  -1 -10  114.89    3.60
  -5   1 -10  119.09    3.60
   5   1  10  120.39    3.60
  -5   1 -10  116.99    3.60
   5   1  10  124.19    3.60
   6  -1  10   14.60    0.50
  -6  -1 -10   15.90    0.60
   6   1  10   15.10    0.50
  -6   1 -10   15.10    0.50
  -7  -1 -10   30.70    1.00
  -7   1 -10   30.40    1.00
  -8  -1 -10   14.90    0.50
  -8   1 -10   15.60    0.50
  -9  -1 -10    1.70    0.20
  -9   1 -10    1.90    0.10
 -10  -1 -10    0.00    0.10
 -17  -2  10    0.20    0.10
 -17   2  10    0.10    0.10
  17   2 -10    0.10    0.10
 -17   2  10    0.10    0.10
 -17   2  10    0.20    0.10
 -16  -2  10   33.60    1.00
  16  -2 -10   33.90    1.00
 -16   2  10   33.40    1.00
  16   2 -10   32.70    1.10
 -16   2  10   33.30    1.00
 -16   2  10   32.60    1.10
  15  -2 -10    0.20    0.10
 -15  -2  10    0.00    0.10
 -15   2  10    0.20    0.10
 -15   2  10    0.10    0.10
 -15   2  10    0.20    0.10
 -15   2  10    0.10    0.10
  15   2 -10    0.00    0.10
 -14  -2  10   65.29    2.00
  14  -2 -10   59.99    1.90
 -14   2  10   64.69    2.00
 -14   2  10   64.09    2.00
 -14   2  10   66.29    2.00
  14   2 -10   65.99    2.00
 -13  -2  10    8.10    0.40
 -13  -2  10    8.20    0.40
  13   2 -10    8.00    0.40
 -13   2  10    8.10    0.30
  13   2 -10    8.00    0.30
 -13   2  10    7.90    0.40
 -13   2  10    8.20    0.30
 -12  -2  10   85.69    2.70
 -12  -2  10   90.69    2.70
 -12  -2  10   83.79    2.60
 -12   2  10   87.79    2.60
 -12   2  10   88.29    2.70
 -12   2  10   87.09    2.60
  12   2 -10   89.49    2.70
  12   2 -10   83.49    2.60
 -11  -2  10   97.39    3.00
 -11  -2  10  100.49    3.00
 -11  -2  10   98.09    3.00
  11   2 -10   99.29    3.00
 -11   2  10   98.29    3.00
 -11   2  10  101.09    3.00
  11   2 -10   99.69    3.00
 -11   2  10   97.59    3.00
 -10  -2  10  145.99    4.50
 -10  -2  10  152.68    4.50
 -10  -2  10  154.18    4.50
 -10  -2  10  159.18    4.50
 -10   2  10  146.19    4.50
 -10   2  10  149.99    4.50
 -10   2  10  150.68    4.50
  10   2 -10  153.88    4.50
  10   2 -10  149.39    4.50
  -9  -2  10    3.40    0.20
   9  -2 -10    2.60    0.30
  -9  -2  10    2.50    0.20
  -9  -2  10    2.90    0.20
  -9  -2  10    2.60    0.20
   9   2 -10    2.70    0.20
  -9   2  10    2.80    0.20
   9   2 -10    2.70    0.20
  -9   2  10    2.80    0.20
  -9   2  10    2.80    0.20
  -9   2  10    2.70    0.20
   8  -2 -10   30.00    1.10
  -8  -2  10   31.50    1.00
  -8  -2  10   30.30    1.00
  -8  -2  10   31.10    1.00
  -8  -2  10   31.40    1.00
  -8   2  10   30.40    1.00
  -8   2  10   31.60    1.00
   8   2 -10   32.30    1.00
   8   2 -10   31.60    1.00
  -8   2  10   30.80    1.00
  -8   2  10   29.10    1.10
  -7  -2  10   22.10    0.70
   7  -2 -10   21.90    0.90
  -7  -2  10   21.80    0.70
  -7  -2  10   21.60    0.70
   7   2 -10   21.80    0.70
   7   2 -10   21.20    0.70
  -7   2  10   20.70    0.80
  -7   2  10   22.40    0.70
  -7   2  10   22.40    0.70
  -6  -2  10   38.50    1.20
  -6  -2  10   37.00    1.20
  -6  -2  10   37.70    1.20
  -6   2  10   37.90    1.30
   6   2 -10   37.60    1.20
  -6   2  10   35.90    1.20
   6   2 -10   39.60    1.20
  -5  -2  10   86.39    2.50
  -5  -2  10   83.29    2.50
  -5  -2  10   81.49    2.50
  -5   2  10   78.29    2.50
  -5   2  10   80.59    2.60
   5   2 -10   85.39    2.50
  -5   2  10   78.39    2.50
   5   2 -10   82.49    2.50
  -5   2  10   83.39    2.50
  -4  -2  10   11.80    0.50
  -4  -2  10   11.70    0.40
  -4  -2  10   11.30    0.40
  -4  -2  10   11.90    0.40
  -4   2  10   11.80    0.50
  -4   2  10   12.00    0.40
  -4   2  10   12.30    0.60
   4   2 -10   11.80    0.40
   4   2 -10   11.90    0.40
  -4   2  10   11.60    0.40
  -3  -2  10   29.70    1.00
  -3  -2  10   27.80    0.90
  -3  -2  10   29.60    0.90
  -3  -2  10   29.50    0.90
  -3   2  10   28.50    0.90
   3   2 -10   29.50    0.90
  -3   2  10   28.10    1.10
   3   2 -10   28.30    0.90
  -3   2  10   27.70    0.90
  -3   2  10   30.40    1.00
  -2  -2  10  202.68    5.40
  -2  -2  10  178.18    5.50
  -2  -2  10  183.48    5.50
  -2  -2  10  183.48    5.50
   2   2 -10  180.58    5.40
  -2   2  10  180.18    5.60
   2   2 -10  186.08    5.50
  -2   2  10  181.48    5.40
   2   2 -10  184.68    5.50
  -2   2  10  175.48    5.50
  -2   2  10  188.78    5.50
  -1  -2  10   66.19    2.00
  -1  -2  10   62.29    1.90
  -1  -2  10   64.69    1.90
   1   2 -10   64.19    1.90
  -1   2  10   63.99    1.90
   1   2 -10   63.19    1.90
   1   2 -10   61.79    1.90
  -1   2  10   62.59    2.10
  -1   2  10   65.29    2.00
  -1   2  10   63.09    2.00
   0  -2  10    3.40    0.20
   0  -2  10    3.30    0.20
   0  -2 -10    3.10    0.10
   0   2  10    3.70    0.20
   0   2 -10    3.10    0.20
   0   2  10    2.90    0.30
   0   2 -10    2.90    0.20
   0   2  10    3.00    0.20
   1  -2  10    2.90    0.20
  -1  -2 -10    2.50    0.10
   1   2  10    2.10    0.40
  -1   2 -10    2.70    0.20
   1   2  10    2.50    0.20
   1   2  10    2.70    0.20
   1   2  10    3.00    0.20
  -1   2 -10    3.00    0.20
   2  -2  10   43.50    1.40
  -2  -2 -10   44.50    1.30
   2  -2  10   42.50    1.40
   2   2  10   44.40    1.40
  -2   2 -10   44.80    1.40
  -2   2 -10   42.30    1.40
   2   2  10   44.70    1.40
   2   2  10   44.50    1.40
  -3  -2 -10   38.00    1.20
   3  -2  10   36.10    1.20
   3  -2  10   35.10    1.20
   3   2  10   37.50    1.20
   3   2  10   37.80    1.20
  -3   2 -10   36.30    1.20
  -3   2 -10   38.60    1.20
   3   2  10   37.60    1.20
  -4  -2 -10   36.90    1.10
   4  -2  10   35.90    1.10
  -4  -2 -10   35.10    1.20
   4   2  10   35.80    1.20
  -4   2 -10   35.30    1.10
   4   2  10   36.20    1.10
  -4   2 -10   34.30    1.10
   4   2  10   36.30    1.20
   5  -2  10    2.70    0.20
  -5  -2 -10    2.60    0.20
  -5  -2 -10    3.30    0.20
   5   2  10    2.70    0.20
   5   2  10    2.40    0.30
  -5   2 -10    2.60    0.20
  -5   2 -10    2.80    0.20
   5   2  10    2.30    0.20
   6  -2  10    0.90    0.10
  -6  -2 -10    0.80    0.10
  -6  -2 -10    0.90    0.10
  -6   2 -10    0.80    0.10
  -6   2 -10    0.80    0.10
   6   2  10    0.80    0.10
  -7  -2 -10   29.10    0.90
  -7   2 -10   28.20    0.90
  -7   2 -10   29.30    0.90
  -8  -2 -10    0.10    0.10
  -8   2 -10    0.20    0.10
  -8   2 -10    0.10    0.10
  -9  -2 -10    0.20    0.10
  -9   2 -10    0.10    0.10
 -15   3  10    1.40    0.10
 -15   3  10    1.40    0.10
 -15   3  10    1.40    0.10
  15   3 -10    1.40    0.10
 -14   3  10   11.80    0.40
 -14   3  10   11.30    0.40
 -14   3  10   11.70    0.40
  14   3 -10   11.90    0.40
 -13   3  10    7.00    0.30
  13   3 -10    7.10    0.30
 -13   3  10    6.90    0.30
 -13   3  10    6.70    0.30
  12   3 -10    0.10    0.10
 -12   3  10    0.10    0.10
 -12   3  10    0.20    0.10
 -12   3  10    0.60    0.10
 -11   3  10   54.59    1.80
  11   3 -10   58.59    1.80
 -11   3  10   57.19    1.70
  10   3 -10  260.37    7.60
 -10   3  10  250.27    7.60
   9   3 -10  182.68    5.50
  -8  -3  10   37.60    1.20
  -8  -3  10   34.70    1.10
   8   3 -10   37.50    1.20
   8   3 -10   35.60    1.10
  -7  -3  10    9.10    0.40
   7   3 -10    8.50    0.30
   7   3 -10    9.20    0.40
  -6  -3  10   25.40    0.80
  -6  -3  10   25.80    0.90
   6   3 -10   26.20    0.90
   6   3 -10   25.30    0.80
  -5  -3  10   36.80    1.20
  -5  -3  10   35.00    1.10
  -5  -3  10   38.20    1.20
   5   3 -10   35.90    1.10
   5   3 -10   37.50    1.20
  -5   3  10   36.30    1.10
  -5   3  10   35.90    1.20
  -4  -3  10   23.50    0.80
  -4  -3  10   25.40    0.80
  -4  -3  10   25.10    0.80
   4   3 -10   23.70    0.80
   4   3 -10   24.00    0.80
  -4   3  10   23.40    0.80
  -4   3  10   24.30    0.80
   4   3 -10   23.80    0.80
  -3  -3  10   18.10    0.70
  -3  -3  10   17.90    0.60
  -3  -3  10   17.70    0.60
   3   3 -10   17.90    0.60
  -3   3  10   18.50    0.70
   3   3 -10   17.80    0.60
  -3   3  10   17.40    0.60
   3   3 -10   18.00    0.60
  -2  -3  10    0.50    0.10
  -2  -3  10    0.30    0.10
   2   3 -10    0.40    0.10
   2   3 -10    0.40    0.10
  -2   3  10    0.30    0.10
  -2   3  10    0.40    0.10
   2   3 -10    0.50    0.10
  -1  -3  10   32.50    1.10
  -1  -3  10   31.30    1.00
   1   3 -10   32.70    1.00
  -1   3  10   31.90    1.00
   1   3 -10   31.90    1.00
  -1   3  10   33.20    1.10
   0  -3 -10    9.30    0.30
   0  -3  10    9.30    0.40
   0  -3  10    9.10    0.40
   0   3 -10    9.80    0.40
   0   3  10    9.40    0.40
   0   3  10    9.40    0.40
   0   3 -10    9.40    0.40
   0   3  10   10.00    0.40
   1  -3  10  315.57    9.40
  -1  -3 -10  314.27    9.40
   1  -3  10  311.17    9.40
  -1   3 -10  319.47    9.40
   1   3  10  326.27    9.40
   1   3  10  314.67    9.40
   1   3  10  322.87    9.40
  -1   3 -10  322.27    9.40
   2  -3  10   95.69    2.90
  -2  -3 -10   97.09    2.90
   2  -3  10   94.19    2.90
  -2  -3 -10   91.89    2.90
   2   3  10   93.69    2.90
  -2   3 -10   97.09    2.90
   2   3  10   93.99    2.90
  -2   3 -10   95.49    2.90
   2   3  10   97.39    2.90
  -3  -3 -10   89.99    2.70
   3  -3  10   89.99    2.70
  -3  -3 -10   86.29    2.70
   3   3  10   87.59    2.70
   3   3  10   87.29    2.70
  -3   3 -10   90.59    2.70
   3   3  10   88.49    2.70
  -3   3 -10   91.09    2.70
  -4  -3 -10   25.10    0.80
  -4  -3 -10   24.00    0.80
   4  -3  10   24.70    0.80
   4   3  10   24.00    0.80
  -4   3 -10   25.00    0.80
  -4   3 -10   24.50    0.80
   4   3  10   23.90    0.80
   5  -3  10    6.30    0.30
  -5  -3 -10    6.20    0.30
  -5  -3 -10    6.20    0.30
   5   3  10    6.00    0.30
   5   3  10    6.10    0.30
  -5   3 -10    6.40    0.30
  -5   3 -10    6.50    0.30
  -6  -3 -10    2.70    0.10
  -6  -3 -10    2.60    0.20
   6  -3  10    2.80    0.20
  -6   3 -10    2.80    0.20
   6   3  10    2.70    0.20
  -6   3 -10    2.70    0.20
  -7  -3 -10    7.00    0.30
  -7   3 -10    6.80    0.30
  -7   3 -10    6.80    0.30
  -8  -3 -10    0.50    0.10
  -8   3 -10    0.60    0.10
  -8   3 -10    0.50    0.10
 -13   4  10    9.00    0.30
  13   4 -10    9.10    0.30
 -12   4  10    2.60    0.20
  12   4 -10    2.50    0.20
  11   4 -10    7.60    0.30
  10   4 -10   12.20    0.50
  -9  -4  10  198.88    6.00
   9   4 -10  207.98    6.10
  -8  -4  10   87.19    2.70
   8   4 -10   87.19    2.70
  -7  -4  10    6.40    0.30
   7   4 -10    6.00    0.30
  -6  -4  10   57.39    1.80
   6   4 -10   56.19    1.80
  -6   4  10   55.49    1.70
  -5  -4  10    0.20    0.10
  -5  -4  10    0.20    0.10
  -5   4  10    0.10    0.10
   5   4 -10    0.20    0.10
  -5   4  10    0.10    0.10
  -4  -4  10   27.20    0.90
  -4  -4  10   28.70    0.90
  -4   4  10   27.10    0.90
   4   4 -10   28.90    0.90
   4   4 -10   26.70    0.90
  -4   4  10   27.30    0.90
  -3  -4  10   20.70    0.70
  -3  -4  10   21.10    0.70
   3   4 -10   20.00    0.70
  -3   4  10   21.30    0.70
  -3   4  10   19.90    0.70
   3   4 -10   21.30    0.70
  -2  -4  10   10.20    0.40
  -2  -4  10   10.40    0.40
  -2   4  10   10.40    0.40
   2   4 -10   10.00    0.40
  -2   4  10   10.10    0.40
   2   4 -10   10.00    0.40
  -1  -4  10    1.70    0.20
  -1  -4  10    1.80    0.20
   1  -4 -10    1.90    0.10
  -1   4  10    1.80    0.20
   1   4 -10    1.60    0.20
  -1   4  10    1.70    0.20
   1   4 -10    1.50    0.20
   0  -4  10    0.80    0.10
   0  -4 -10    0.70    0.10
   0  -4  10    0.70    0.10
   0   4  10    0.60    0.10
   0   4  10    0.50    0.10
   0   4 -10    0.60    0.10
   0   4 -10    0.80    0.10
   1  -4  10    0.90    0.10
  -1  -4 -10    1.10    0.10
   1  -4  10    1.00    0.10
   1   4  10    0.80    0.10
   1   4  10    1.10    0.10
  -1   4 -10    0.90    0.10
  -1   4 -10    0.90    0.10
   2  -4  10   20.70    0.70
   2  -4  10   22.40    0.70
  -2  -4 -10   21.60    0.70
   2   4  10   22.00    0.70
   2   4  10   22.80    0.80
  -2   4 -10   23.10    0.70
  -2   4 -10   21.20    0.70
   3  -4  10    0.50    0.10
  -3  -4 -10    0.40    0.10
  -3   4 -10    0.50    0.10
   3   4  10    0.50    0.10
  -3   4 -10    0.50    0.10
   3   4  10    0.40    0.10
  -4  -4 -10    0.30    0.10
   4  -4  10    0.30    0.10
  -4   4 -10    0.30    0.10
  -4   4 -10    0.30    0.10
   4   4  10    0.40    0.10
   4   4  10    0.30    0.10
   5  -4  10    2.20    0.10
  -5  -4 -10    2.10    0.10
  -5   4 -10    2.10    0.10
  -5   4 -10    2.00    0.10
   5   4  10    2.20    0.20
  -6   4 -10   48.50    1.50
  10   5 -10   16.80    0.60
  -9  -5  10    7.90    0.30
   9   5 -10    8.80    0.30
  -8  -5  10   68.79    2.10
   8   5 -10   67.89    2.10
  -7  -5  10   12.10    0.40
   7   5 -10   11.50    0.40
  -6  -5  10    0.20    0.10
   6   5 -10    0.20    0.10
  -5  -5  10    1.00    0.10
  -5   5  10    0.90    0.10
   5   5 -10    0.80    0.10
  -4  -5  10    0.30    0.10
  -4  -5  10    0.40    0.10
  -4   5  10    0.30    0.10
  -4   5  10    0.30    0.10
   4   5 -10    0.30    0.10
  -3  -5  10    1.10    0.10
  -3  -5  10    1.00    0.10
   3  -5 -10    1.10    0.10
  -3   5  10    1.00    0.10
  -3   5  10    0.90    0.10
   3   5 -10    1.10    0.10
  -2  -5  10   53.29    1.60
  -2  -5  10   53.69    1.60
   2  -5 -10   51.89    1.60
  -2   5  10   51.59    1.60
   2   5 -10   53.69    1.60
  -2   5  10   52.39    1.60
  -1  -5  10    5.90    0.20
   1  -5 -10    5.70    0.20
  -1  -5  10    5.50    0.30
  -1   5  10    5.50    0.30
   1   5 -10    5.40    0.20
  -1   5  10    5.80    0.20
   0  -5 -10   50.89    1.50
   0  -5  10   47.10    1.60
   0  -5  10   52.69    1.50
   0   5  10   51.79    1.50
   0   5  10   51.59    1.60
   0   5 -10   51.69    1.60
   1  -5  10    8.20    0.40
   1  -5  10   10.20    0.30
  -1   5 -10    9.10    0.30
   1   5  10   10.20    0.30
   1   5  10    9.60    0.40
   2  -5  10    0.90    0.10
   2   5  10    1.00    0.10
   2   5  10    0.80    0.10
 -18   0  11    0.00    0.10
  18   0 -11    0.00    0.10
 -17   0  11    0.00    0.10
 -17   0  11    0.00    0.10
 -17   0  11    0.10    0.10
  17   0 -11    0.00    0.10
 -17   0  11    0.10    0.10
  17   0 -11    0.00    0.10
 -16   0  11    0.00    0.10
 -16   0  11    0.10    0.10
 -16   0  11    0.00    0.10
 -16   0  11    0.00    0.10
  16   0 -11    0.00    0.10
 -15   0  11    0.10    0.10
 -15   0  11    0.00    0.10
 -15   0  11    0.10    0.10
  15   0 -11    0.00    0.10
 -15   0  11    0.00    0.10
 -14   0  11    0.00    0.10
 -14   0  11   -0.10    0.10
  14   0 -11    0.00    0.10
 -14   0  11    0.00    0.10
 -14   0  11    0.10    0.10
 -13   0  11    0.00    0.10
 -13   0  11    0.00    0.10
  13   0 -11    0.00    0.10
 -13   0  11   -0.10    0.10
 -13   0  11    0.30    0.10
 -12   0  11    0.00    0.10
 -12   0  11    0.20    0.10
 -12   0  11    0.00    0.10
 -12   0  11    0.10    0.10
  12   0 -11    0.00    0.10
 -11   0  11    0.00    0.10
 -11   0  11    0.10    0.10
  11   0 -11    0.00    0.10
 -11   0  11    0.00    0.10
 -11   0  11    0.00    0.10
 -10   0  11    0.20    0.10
 -10   0  11    0.00    0.10
 -10   0  11    0.10    0.10
  10   0 -11    0.00    0.10
  10   0 -11    0.50    0.20
 -10   0  11    0.10    0.10
   9   0 -11    0.30    0.10
   9   0 -11    0.10    0.20
  -9   0  11    0.10    0.10
  -9   0  11    0.00    0.10
  -9   0  11   -0.10    0.10
  -9   0  11    0.60    0.10
  -9   0  11    0.10    0.10
  -8   0  11    0.10    0.10
  -8   0  11    0.50    0.10
  -8   0  11    0.10    0.10
  -7   0  11    0.10    0.10
  -7   0  11    0.00    0.10
   7   0 -11    0.00    0.10
  -7   0  11    0.00    0.10
  -7   0  11    0.10    0.20
  -6   0  11    0.10    0.10
   6   0 -11    0.10    0.10
  -6   0  11    0.20    0.10
  -6   0  11    0.00    0.10
  -6   0  11    0.00    0.10
  -6   0  11    0.10    0.10
  -5   0  11    0.00    0.10
   5   0 -11    0.00    0.10
  -5   0  11    0.10    0.10
  -5   0  11    0.10    0.10
  -5   0  11    0.20    0.20
  -5   0  11    0.10    0.10
  -4   0  11    0.00    0.10
  -4   0  11   -0.10    0.10
  -4   0  11    0.10    0.10
  -4   0  11    0.10    0.10
  -4   0  11    0.10    0.20
   4   0 -11    0.10    0.10
   3   0 -11    0.00    0.10
  -3   0  11    0.10    0.10
  -3   0  11    0.00    0.10
  -3   0  11    0.00    0.10
  -3   0  11    0.00    0.10
  -3   0  11    0.00    0.10
  -3   0  11    0.00    0.10
   2   0 -11    0.10    0.10
  -2   0  11    0.00    0.10
  -2   0  11    0.00    0.10
  -2   0  11    0.00    0.10
   2   0 -11    0.10    0.10
  -2   0  11    0.00    0.20
  -2   0  11    0.00    0.10
  -2   0  11    0.20    0.10
   0   0  11    0.00    0.10
   0   0  11    0.00    0.20
   0   0  11   -0.10    0.10
   0   0 -11    0.10    0.10
   0   0  11    0.20    0.10
   0   0 -11    0.00    0.10
   0   0  11   -0.10    0.10
   1   0  11   -0.10    0.10
   1   0  11    0.00    0.10
  -1   0 -11    0.10    0.10
  -1   0 -11    0.10    0.10
   1   0  11    0.10    0.20
   1   0  11    0.20    0.10
  -2   0 -11    0.10    0.10
  -2   0 -11    0.10    0.10
   2   0  11    0.00    0.10
   2   0  11    0.00    0.10
   2   0  11    0.00    0.10
  -3   0 -11    0.10    0.10
  -3   0 -11   -0.10    0.10
   3   0  11    0.20    0.10
   3   0  11    0.00    0.10
   3   0  11    0.10    0.10
  -4   0 -11    0.10    0.10
   4   0  11    0.50    0.10
  -4   0 -11    0.50    0.10
  -4   0 -11    0.20    0.10
   4   0  11    0.00    0.10
  -5   0 -11    0.10    0.10
   5   0  11    0.10    0.10
   6   0  11    0.00    0.10
  -6   0 -11    0.00    0.10
  -7   0 -11    0.00    0.10
  -8   0 -11    0.00    0.10
  -9   0 -11   -0.10    0.10
 -17  -1  11    1.40    0.10
  17  -1 -11    1.70    0.10
 -17  -1  11    1.50    0.10
 -17   1  11    1.40    0.10
 -17   1  11    1.40    0.10
 -17   1  11    1.50    0.10
  17   1 -11    1.50    0.10
 -17   1  11    1.50    0.10
 -16  -1  11    2.20    0.10
  16  -1 -11    2.20    0.10
 -16  -1  11    1.90    0.20
 -16  -1  11    2.10    0.10
 -16  -1  11    1.90    0.20
  16   1 -11    2.30    0.20
 -16   1  11    2.20    0.20
 -16   1  11    2.00    0.20
  16   1 -11    2.30    0.10
 -16   1  11    2.00    0.20
 -16   1  11    2.40    0.20
 -15  -1  11    0.30    0.10
 -15  -1  11    0.60    0.10
 -15  -1  11    0.30    0.10
 -15  -1  11    0.40    0.10
  15  -1 -11    0.30    0.10
  15   1 -11    0.40    0.10
 -15   1  11    0.30    0.10
 -15   1  11    0.30    0.10
  15   1 -11    0.20    0.10
 -15   1  11    0.40    0.10
 -15   1  11    0.40    0.10
 -14  -1  11   76.89    2.40
 -14  -1  11   80.89    2.40
  14  -1 -11   75.09    2.30
 -14  -1  11   76.39    2.30
 -14  -1  11   75.19    2.30
 -14   1  11   76.09    2.30
 -14   1  11   76.69    2.40
 -14   1  11   77.79    2.40
  14   1 -11   78.49    2.40
 -14   1  11   76.29    2.30
  14   1 -11   76.59    2.30
 -13  -1  11  283.17    8.40
  13  -1 -11  268.27    8.40
 -13  -1  11  278.67    8.50
 -13  -1  11  300.57    8.50
 -13  -1  11  278.97    8.40
  13   1 -11  290.87    8.50
 -13   1  11  290.87    8.40
  13   1 -11  282.07    8.40
 -13   1  11  290.97    8.50
 -13   1  11  289.47    8.50
 -13   1  11  286.77    8.40
  12  -1 -11    4.40    0.20
 -12  -1  11    5.00    0.30
 -12  -1  11    4.40    0.20
 -12  -1  11    4.90    0.30
 -12  -1  11    4.70    0.30
 -12   1  11    4.20    0.30
  12   1 -11    4.60    0.20
 -12   1  11    4.90    0.30
 -12   1  11    4.40    0.20
 -12   1  11    4.60    0.30
 -11  -1  11  159.68    4.80
 -11  -1  11  165.28    4.80
 -11  -1  11  165.98    4.90
 -11  -1  11  160.58    4.90
 -11   1  11  160.68    4.90
  11   1 -11  160.28    4.80
 -11   1  11  165.68    4.80
 -11   1  11  158.88    4.90
 -11   1  11  164.98    4.80
 -10  -1  11  794.32   23.00
 -10  -1  11  768.12   23.00
 -10  -1  11  781.22   23.00
 -10  -1  11  779.22   23.00
 -10   1  11  771.12   23.00
 -10   1  11  768.52   23.00
 -10   1  11  767.32   23.00
 -10   1  11  842.52   23.00
  10   1 -11  787.02   23.00
   9  -1 -11  142.79    4.50
  -9  -1  11  148.49    4.40
  -9  -1  11  147.79    4.30
  -9  -1  11  146.99    4.40
  -9  -1  11  149.69    4.30
  -9  -1  11  139.39    4.50
   9   1 -11  144.59    4.50
  -9   1  11  136.19    4.50
  -9   1  11  150.18    4.30
   9   1 -11  143.79    4.40
  -9   1  11  148.29    4.30
   9   1 -11  149.69    4.30
  -9   1  11  145.59    4.40
  -8  -1  11   41.10    1.30
   8  -1 -11   39.80    1.40
  -8  -1  11   39.30    1.30
  -8  -1  11   40.30    1.40
  -8  -1  11   40.10    1.30
  -8  -1  11   40.50    1.30
   8   1 -11   42.00    1.20
   8   1 -11   40.10    1.40
   8   1 -11   39.20    1.30
  -8   1  11   41.10    1.30
  -8   1  11   41.40    1.30
  -8   1  11   38.90    1.40
  -8   1  11   41.50    1.30
  -7  -1  11    1.50    0.20
  -7  -1  11    1.70    0.20
  -7  -1  11    1.60    0.20
  -7  -1  11    1.70    0.30
  -7  -1  11    1.60    0.20
  -7  -1  11    1.60    0.20
   7   1 -11    1.70    0.10
  -7   1  11    1.60    0.20
  -7   1  11    1.50    0.30
   7   1 -11    1.60    0.20
  -7   1  11    1.70    0.20
  -7   1  11    1.90    0.20
  -6  -1  11    2.40    0.20
  -6  -1  11    2.20    0.20
  -6  -1  11    2.40    0.20
  -6  -1  11    2.40    0.20
  -6  -1  11    2.70    0.30
   6   1 -11    2.50    0.10
  -6   1  11    3.00    0.20
  -6   1  11    2.40    0.30
  -6   1  11    2.50    0.20
  -6   1  11    2.30    0.20
  -6   1  11    2.30    0.20
  -5  -1  11    1.40    0.10
  -5  -1  11    1.40    0.20
  -5  -1  11    1.10    0.20
  -5  -1  11    1.40    0.20
  -5  -1  11    1.80    0.20
   5   1 -11    1.40    0.10
  -5   1  11    1.20    0.20
  -5   1  11    1.60    0.10
  -5   1  11    1.10    0.10
  -5   1  11    1.50    0.10
  -5   1  11    1.80    0.20
  -4  -1  11   40.50    1.30
  -4  -1  11   43.10    1.30
  -4  -1  11   41.70    1.30
  -4  -1  11   38.80    1.30
  -4  -1  11   41.00    1.30
  -4  -1  11   42.30    1.40
  -4   1  11   39.40    1.30
   4   1 -11   42.80    1.30
  -4   1  11   39.30    1.30
  -4   1  11   45.00    1.30
  -4   1  11   41.70    1.50
  -4   1  11   41.60    1.30
  -3  -1  11   51.29    1.70
  -3  -1  11   51.19    1.60
  -3  -1  11   54.09    1.60
  -3  -1  11   49.50    1.50
  -3  -1  11   47.90    1.60
  -3  -1  11   49.70    1.50
  -3   1  11   51.99    1.60
   3   1 -11   51.29    1.50
  -3   1  11   50.19    1.70
  -3   1  11   50.19    1.60
  -3   1  11   48.50    1.50
  -3   1  11   48.10    1.50
  -2  -1  11   23.50    0.80
  -2  -1  11   22.30    0.80
   2  -1 -11   24.00    0.70
  -2  -1  11   24.10    0.80
  -2  -1  11   23.80    0.80
  -2  -1  11   24.20    0.90
  -2  -1  11   23.90    0.80
  -2   1  11   23.90    0.90
  -2   1  11   24.00    0.80
  -2   1  11   23.80    0.80
   2   1 -11   23.10    0.80
  -2   1  11   25.00    0.80
   2   1 -11   23.90    0.80
  -1  -1  11    2.20    0.20
  -1  -1  11    2.20    0.20
   1  -1 -11    2.10    0.10
  -1  -1  11    2.40    0.30
  -1  -1  11    2.40    0.20
  -1  -1  11    2.20    0.20
  -1   1  11    2.10    0.20
   1   1 -11    2.40    0.20
  -1   1  11    2.10    0.20
   1   1 -11    2.00    0.20
  -1   1  11    2.70    0.30
  -1   1  11    2.10    0.20
   1   1 -11    2.10    0.10
   0  -1  11   14.20    0.70
   0  -1  11   14.30    0.50
   0  -1  11   15.10    0.60
   0  -1  11   14.40    0.50
   0  -1  11   14.00    0.50
   0  -1 -11   14.70    0.50
   0   1 -11   14.00    0.50
   0   1  11   14.70    0.50
   0   1  11   14.80    0.60
   0   1 -11   13.80    0.50
   0   1  11   14.70    0.70
   0   1  11   15.00    0.60
   0   1 -11   14.30    0.50
  -1  -1 -11    2.30    0.10
   1  -1  11    2.20    0.30
   1  -1  11    2.50    0.20
   1  -1  11    2.40    0.20
   1  -1  11    2.20    0.20
   1   1  11    2.40    0.20
   1   1  11    2.40    0.30
  -1   1 -11    2.20    0.20
   1   1  11    2.30    0.20
  -1   1 -11    2.20    0.10
  -1   1 -11    2.30    0.20
   1   1  11    2.00    0.20
   2  -1  11  114.89    3.50
   2  -1  11  114.49    3.40
  -2  -1 -11  120.89    3.40
   2  -1  11  108.69    3.40
   2   1  11  117.79    3.40
  -2   1 -11  110.89    3.40
  -2   1 -11  115.49    3.40
   2   1  11  112.99    3.50
   2   1  11  118.39    3.50
  -2   1 -11  111.39    3.40
   3  -1  11    1.30    0.10
   3  -1  11    1.50    0.20
  -3   1 -11    1.40    0.10
   3   1  11    1.20    0.10
   3   1  11    1.20    0.20
   3   1  11    1.30    0.20
  -3   1 -11    1.30    0.10
  -4  -1 -11   50.19    1.50
   4  -1  11   46.90    1.50
  -4  -1 -11   47.80    1.50
   4   1  11   45.70    1.50
   4   1  11   45.90    1.50
  -4   1 -11   47.10    1.50
  -4   1 -11   46.50    1.50
   4   1  11   47.80    1.50
  -5  -1 -11   58.09    1.90
  -5  -1 -11   64.39    1.90
   5  -1  11   62.49    1.90
   5   1  11   62.09    1.90
  -5   1 -11   62.49    1.90
   5   1  11   61.49    1.90
  -6  -1 -11    0.90    0.10
   6  -1  11    1.20    0.10
   6   1  11    1.00    0.10
  -6   1 -11    1.20    0.10
  -7  -1 -11  144.29    4.20
  -7   1 -11  137.69    4.20
  -8  -1 -11    7.40    0.30
  -8   1 -11    7.00    0.30
  -9  -1 -11    9.50    0.30
 -17   2  11    0.40    0.10
 -17   2  11    0.40    0.10
 -17   2  11    0.40    0.10
  16  -2 -11   15.00    0.50
 -16  -2  11   14.50    0.50
 -16   2  11   14.70    0.50
  16   2 -11   15.50    0.50
 -16   2  11   14.80    0.50
 -16   2  11   14.70    0.50
 -15  -2  11   19.20    0.60
 -15   2  11   19.10    0.60
 -15   2  11   18.40    0.60
 -15   2  11   19.30    0.60
  15   2 -11   19.10    0.70
 -14  -2  11    2.20    0.20
  14  -2 -11    1.90    0.10
 -14   2  11    2.10    0.20
  14   2 -11    2.00    0.20
 -14   2  11    1.80    0.20
 -14   2  11    1.90    0.20
 -13  -2  11   78.49    2.30
 -13  -2  11   73.39    2.30
 -13   2  11   76.99    2.30
  13   2 -11   72.49    2.30
 -13   2  11   77.39    2.30
  13   2 -11   78.89    2.40
 -13   2  11   77.29    2.30
 -12  -2  11   74.99    2.30
 -12  -2  11   75.19    2.30
  12   2 -11   73.89    2.30
  12   2 -11   75.49    2.30
 -12   2  11   76.49    2.30
 -12   2  11   77.49    2.30
 -12   2  11   75.59    2.30
 -11  -2  11   12.50    0.50
 -11  -2  11   12.80    0.50
 -11  -2  11   11.90    0.50
  11   2 -11   12.90    0.50
 -11   2  11   13.00    0.50
 -11   2  11   12.40    0.50
  11   2 -11   12.20    0.40
 -11   2  11   12.30    0.50
 -11   2  11   13.70    0.50
 -10  -2  11  587.84   17.70
 -10  -2  11  596.54   17.70
 -10  -2  11  607.14   17.70
 -10   2  11  603.24   17.70
 -10   2  11  601.14   17.70
 -10   2  11  623.64   17.70
  10   2 -11  604.24   17.70
  10   2 -11  599.24   17.70
 -10   2  11  599.54   17.80
  -9  -2  11   85.89    2.80
  -9  -2  11   97.69    2.80
  -9   2  11   94.99    2.80
  -9   2  11   95.59    2.80
  -9   2  11   90.29    2.80
   9   2 -11   95.39    2.80
   9   2 -11   93.59    2.80
  -8  -2  11  100.09    3.00
  -8  -2  11   97.29    3.00
  -8  -2  11   99.59    3.00
  -8  -2  11  101.59    3.00
  -8   2  11   99.99    3.00
  -8   2  11   87.09    3.10
   8   2 -11  100.39    3.00
  -8   2  11   98.79    3.00
   8   2 -11  104.49    3.00
  -8   2  11  100.59    3.00
  -7  -2  11    0.10    0.10
   7  -2 -11    0.30    0.20
  -7  -2  11    0.30    0.10
  -7  -2  11    0.40    0.10
  -7   2  11    0.10    0.10
  -7   2  11    0.80    0.10
   7   2 -11    0.20    0.10
   7   2 -11    0.30    0.10
  -6  -2  11  270.27    7.90
  -6  -2  11  269.67    7.90
  -6  -2  11  276.37    7.90
  -6   2  11  264.87    7.90
  -6   2  11  257.67    7.90
   6   2 -11  272.47    7.90
  -6   2  11  254.17    8.00
   6   2 -11  277.67    7.90
  -5  -2  11   40.40    1.30
  -5  -2  11   40.50    1.20
  -5  -2  11   38.70    1.20
  -5   2  11   38.80    1.20
  -5   2  11   37.20    1.20
  -5   2  11   37.10    1.40
  -5   2  11   38.60    1.20
   5   2 -11   40.60    1.20
  -4  -2  11   10.80    0.40
  -4  -2  11   11.50    0.50
  -4  -2  11   11.90    0.50
  -4  -2  11   12.70    0.50
  -4   2  11   12.00    0.50
   4   2 -11   12.70    0.40
  -4   2  11   13.20    0.50
  -4   2  11   11.60    0.40
   4   2 -11   11.70    0.40
  -4   2  11   11.50    0.60
  -3  -2  11    5.60    0.30
  -3  -2  11    6.30    0.30
  -3  -2  11    5.50    0.30
  -3  -2  11    6.20    0.30
  -3   2  11    5.90    0.30
   3   2 -11    5.50    0.20
  -3   2  11    5.40    0.40
   3   2 -11    6.10    0.30
  -3   2  11    6.00    0.30
   3   2 -11    5.90    0.30
  -3   2  11    5.90    0.30
  -2  -2  11    0.60    0.10
  -2  -2  11    0.60    0.10
  -2   2  11    0.70    0.10
  -2   2  11    0.50    0.10
  -2   2  11    0.50    0.20
   2   2 -11    0.60    0.10
  -1  -2  11  240.98    7.30
  -1  -2  11  251.67    7.30
   1  -2 -11  234.28    7.20
  -1  -2  11  249.08    7.30
   1   2 -11  249.78    7.30
  -1   2  11  235.48    7.70
  -1   2  11  252.47    7.30
  -1   2  11  250.37    7.30
  -1   2  11  253.47    7.30
   1   2 -11  244.78    7.30
   0  -2  11    6.30    0.30
   0  -2  11    6.70    0.30
   0  -2 -11    6.40    0.30
   0   2  11    6.40    0.30
   0   2  11    7.70    0.40
   0   2  11    6.50    0.30
   0   2 -11    6.80    0.30
   0   2 -11    6.90    0.30
   1  -2  11   15.70    0.50
  -1  -2 -11   15.10    0.50
   1  -2  11   14.90    0.60
   1   2  11   15.30    0.60
  -1   2 -11   15.10    0.50
   1   2  11   14.90    0.50
  -1   2 -11   14.30    0.50
   1   2  11   15.30    0.60
   2  -2  11 1981.60   56.79
  -2  -2 -11 1959.60   56.89
   2  -2  11 1867.31   56.79
   2   2  11 1924.31   56.79
  -2   2 -11 1906.51   56.79
   2   2  11 1954.40   56.79
  -2   2 -11 2002.80   56.79
   2   2  11 1923.81   56.79
   3  -2  11  252.47    7.70
   3  -2  11  263.97    7.60
  -3  -2 -11  257.27    7.60
  -3  -2 -11  268.47    7.70
  -3   2 -11  261.27    7.70
   3   2  11  259.57    7.70
   3   2  11  259.97    7.70
   3   2  11  254.37    7.60
  -3   2 -11  251.67    7.70
  -5  -2 -11    2.90    0.20
  -5  -2 -11    2.40    0.20
   5  -2  11    2.50    0.20
   5   2  11    2.30    0.20
  -5   2 -11    2.80    0.20
   5   2  11    2.70    0.20
  -5   2 -11    2.70    0.20
  -6  -2 -11    9.80    0.40
   6  -2  11    9.30    0.30
  -6   2 -11    9.20    0.40
   6   2  11    9.10    0.30
  -6   2 -11    9.80    0.40
  -7  -2 -11    1.10    0.10
  -7   2 -11    1.20    0.10
  -7   2 -11    1.00    0.10
  -8  -2 -11    0.60    0.10
  -8   2 -11    0.50    0.10
 -15   3  11    5.50    0.20
 -15   3  11    5.80    0.20
 -15   3  11    5.10    0.20
  15   3 -11    5.60    0.20
  14   3 -11   14.20    0.50
 -14   3  11   13.20    0.50
 -14   3  11   13.50    0.50
 -14   3  11   13.50    0.50
 -13   3  11   95.89    2.90
 -13   3  11   94.59    2.90
 -13   3  11   96.99    2.90
  13   3 -11   98.19    2.90
 -12   3  11    2.10    0.20
 -12   3  11    2.20    0.20
  12   3 -11    2.30    0.20
  11   3 -11    5.70    0.30
  10   3 -11  111.09    3.40
  -9  -3  11    6.40    0.30
  -9  -3  11    6.70    0.30
   9   3 -11    6.70    0.30
   9   3 -11    6.10    0.30
  -8  -3  11   12.70    0.50
  -8  -3  11   12.80    0.50
   8   3 -11   13.80    0.50
   8   3 -11   12.30    0.50
  -7  -3  11   68.69    2.10
  -7  -3  11   68.49    2.10
   7   3 -11   65.99    2.10
   7   3 -11   67.39    2.10
  -6  -3  11    0.80    0.10
  -6  -3  11    0.80    0.10
   6   3 -11    0.90    0.20
   6   3 -11    0.80    0.10
  -6   3  11    1.20    0.10
   6   3 -11    0.80    0.10
  -5  -3  11   32.50    1.00
  -5  -3  11   30.80    1.00
  -5  -3  11   33.90    1.10
  -5   3  11   31.50    1.00
  -5   3  11   30.50    1.00
   5   3 -11   31.20    1.00
   5   3 -11   32.00    1.00
   5   3 -11   32.60    1.00
  -4  -3  11  118.59    3.60
  -4  -3  11  115.89    3.60
  -4  -3  11  121.79    3.60
   4   3 -11  123.79    3.60
  -4   3  11  118.99    3.60
  -4   3  11  119.39    3.60
   4   3 -11  120.19    3.60
   4   3 -11  118.79    3.60
  -3  -3  11    0.80    0.10
  -3  -3  11    0.30    0.10
   3   3 -11    0.30    0.10
  -3   3  11    0.20    0.10
  -3   3  11    0.30    0.10
   3   3 -11    0.20    0.10
  -2  -3  11   20.10    0.70
  -2  -3  11   20.50    0.70
  -2   3  11   20.30    0.70
   2   3 -11   19.70    0.70
  -2   3  11   21.00    0.70
   2   3 -11   20.90    0.70
   1  -3 -11   11.40    0.40
  -1  -3  11   11.30    0.40
  -1  -3  11   11.80    0.50
   1   3 -11   11.50    0.40
   1   3 -11   11.50    0.40
  -1   3  11   11.70    0.50
  -1   3  11   11.50    0.50
  -1   3  11   11.90    0.40
   0  -3  11  145.69    4.40
   0  -3  11  146.79    4.40
   0  -3 -11  143.79    4.40
   0   3  11  148.09    4.40
   0   3 -11  152.38    4.40
   0   3  11  148.09    4.40
   0   3  11  141.69    4.40
   0   3 -11  149.09    4.40
   1  -3  11   31.80    1.00
   1  -3  11   29.80    1.00
  -1  -3 -11   30.80    1.00
  -1  -3 -11   32.40    1.00
  -1   3 -11   32.60    1.00
   1   3  11   30.90    1.00
  -1   3 -11   31.70    1.00
   1   3  11   32.00    1.00
   1   3  11   32.80    1.10
  -2  -3 -11  168.78    5.00
   2  -3  11  169.08    5.00
   2  -3  11  163.48    5.00
  -2  -3 -11  166.18    5.00
   2   3  11  171.58    5.00
  -2   3 -11  167.98    5.00
  -2   3 -11  169.98    5.00
   2   3  11  169.38    5.00
   2   3  11  162.68    5.00
   3  -3  11  116.79    3.50
  -3  -3 -11  115.09    3.50
  -3  -3 -11  111.69    3.50
   3   3  11  118.19    3.50
  -3   3 -11  118.69    3.50
   3   3  11  115.79    3.50
  -3   3 -11  119.99    3.50
  -4  -3 -11    4.40    0.30
   4  -3  11    4.60    0.20
  -4  -3 -11    4.20    0.20
   4   3  11    5.00    0.30
  -4   3 -11    4.80    0.20
   4   3  11    4.60    0.20
  -4   3 -11    4.80    0.20
  -5  -3 -11    9.50    0.40
   5  -3  11    9.70    0.30
  -5  -3 -11    9.20    0.30
   5   3  11    9.50    0.30
  -5   3 -11    9.70    0.40
  -5   3 -11    9.80    0.40
   5   3  11    9.00    0.40
   6  -3  11    0.10    0.10
  -6  -3 -11    0.00    0.10
  -6   3 -11    0.20    0.10
  -6   3 -11    0.10    0.10
  -7   3 -11   14.80    0.50
  -7   3 -11   15.70    0.50
  13   4 -11   10.20    0.40
  12   4 -11    6.30    0.30
  11   4 -11   15.20    0.50
  10   4 -11   58.09    1.80
  -9  -4  11   87.29    2.60
   9   4 -11   87.49    2.70
  -8  -4  11  145.79    4.40
   8   4 -11  146.39    4.40
  -7  -4  11    0.20    0.10
   7   4 -11    0.10    0.10
  -6  -4  11  111.19    3.30
  -6   4  11  106.39    3.20
   6   4 -11  107.89    3.30
  -5  -4  11    3.10    0.20
  -5  -4  11    3.80    0.20
   5   4 -11    3.80    0.20
  -5   4  11    3.70    0.20
   5   4 -11    3.50    0.20
  -5   4  11    3.30    0.20
  -4  -4  11   73.79    2.20
  -4  -4  11   68.19    2.10
   4   4 -11   70.59    2.10
  -4   4  11   71.19    2.10
  -4   4  11   67.49    2.20
   4   4 -11   73.29    2.20
  -3  -4  11    9.20    0.30
  -3  -4  11    9.30    0.40
  -3   4  11    9.30    0.40
   3   4 -11    9.30    0.40
   3   4 -11    9.20    0.40
  -3   4  11    9.20    0.40
   2  -4 -11   28.30    0.90
  -2  -4  11   29.80    0.90
  -2  -4  11   29.90    1.00
  -2   4  11   30.70    0.90
   2   4 -11   30.70    1.00
  -2   4  11   30.00    1.00
   2   4 -11   29.50    1.00
  -1  -4  11   13.20    0.50
  -1  -4  11   12.30    0.50
   1  -4 -11   12.60    0.40
   1   4 -11   12.70    0.50
  -1   4  11   13.10    0.50
  -1   4  11   12.60    0.50
   0  -4  11    1.20    0.10
   0  -4 -11    1.40    0.10
   0  -4  11    1.40    0.20
   0   4  11    1.60    0.10
   0   4 -11    1.50    0.10
   0   4 -11    1.30    0.10
   0   4  11    1.10    0.10
  -1  -4 -11   26.60    0.80
   1  -4  11   25.00    0.90
   1  -4  11   27.00    0.80
   1   4  11   26.70    0.90
  -1   4 -11   26.00    0.80
   1   4  11   26.40    0.80
  -1   4 -11   25.70    0.80
  -2  -4 -11    0.20    0.10
   2  -4  11    0.50    0.10
   2   4  11    0.20    0.10
   2   4  11    0.30    0.10
  -2   4 -11    0.30    0.10
  -2   4 -11    0.40    0.10
   3  -4  11   37.20    1.10
  -3  -4 -11   36.10    1.10
   3   4  11   35.20    1.10
   3   4  11   35.10    1.10
  -3   4 -11   36.40    1.10
  -3   4 -11   35.50    1.10
   4  -4  11  228.38    6.60
   4   4  11  215.48    6.60
  -4   4 -11  216.98    6.60
  -4   4 -11  228.78    6.60
   4   4  11  226.38    6.60
  -5   4 -11   21.60    0.70
   9   5 -11    1.50    0.10
  -8  -5  11   91.69    2.70
   8   5 -11   87.69    2.70
  -7  -5  11   19.70    0.60
   7   5 -11   19.20    0.60
  -6  -5  11   33.30    1.00
   6   5 -11   32.90    1.00
  -5  -5  11    6.20    0.30
   5   5 -11    6.00    0.30
  -5   5  11    6.30    0.20
  -4  -5  11    4.10    0.20
  -4  -5  11    4.00    0.20
  -4   5  11    3.50    0.20
  -4   5  11    4.30    0.20
   4   5 -11    4.30    0.20
  -3  -5  11    7.40    0.30
  -3  -5  11    7.20    0.30
  -3   5  11    7.50    0.30
  -3   5  11    6.70    0.30
   3   5 -11    7.00    0.30
  -2  -5  11   32.40    1.00
  -2  -5  11   33.80    1.00
   2  -5 -11   32.40    1.00
  -2   5  11   31.50    1.00
  -2   5  11   35.20    1.00
   2   5 -11   33.10    1.00
  -1  -5  11   23.10    0.70
  -1  -5  11   22.40    0.70
  -1   5  11   22.20    0.80
  -1   5  11   24.50    0.70
   0  -5  11    0.60    0.10
   0  -5  11    0.80    0.10
   0   5  11    0.60    0.10
   0   5  11    0.80    0.10
   1  -5  11    5.00    0.20
   1   5  11    5.10    0.20
 -17   0  12    9.80    0.40
 -17   0  12    9.80    0.40
 -17   0  12    9.40    0.30
 -17   0  12    9.60    0.30
 -16   0  12   10.80    0.40
  16   0 -12   11.20    0.40
 -16   0  12   10.70    0.40
 -16   0  12   10.60    0.40
 -16   0  12   10.40    0.40
  16   0 -12   11.50    0.40
 -15   0  12    0.10    0.10
 -15   0  12    0.30    0.10
 -15   0  12    0.00    0.10
 -15   0  12    0.00    0.10
  15   0 -12    0.00    0.10
 -14   0  12   11.60    0.40
  14   0 -12   12.00    0.40
 -14   0  12   11.70    0.50
 -14   0  12   12.10    0.50
 -14   0  12   11.90    0.40
 -13   0  12   54.79    1.70
 -13   0  12   52.29    1.70
  13   0 -12   51.59    1.60
 -13   0  12   53.09    1.60
 -13   0  12   53.19    1.70
  12   0 -12   25.90    0.80
 -12   0  12   26.30    0.90
 -12   0  12   26.50    0.90
 -12   0  12   26.00    0.90
 -12   0  12   26.40    0.90
 -11   0  12  139.59    4.10
 -11   0  12  138.79    4.10
 -11   0  12  139.39    4.10
 -11   0  12  135.09    4.10
  11   0 -12  130.39    4.10
  10   0 -12  672.23   20.40
 -10   0  12  703.13   20.40
 -10   0  12  706.63   20.40
 -10   0  12  696.33   20.40
  -9   0  12    0.20    0.10
  -9   0  12    0.50    0.10
  -9   0  12    0.20    0.10
   9   0 -12    0.10    0.10
  -9   0  12    0.20    0.10
  -8   0  12  132.19    3.90
   8   0 -12  121.09    3.80
  -8   0  12  125.49    4.00
  -8   0  12  132.29    3.90
  -8   0  12  134.39    3.90
   7   0 -12    5.30    0.20
  -7   0  12    5.70    0.30
  -7   0  12    5.10    0.30
  -7   0  12    5.50    0.30
  -7   0  12    5.40    0.30
  -7   0  12    5.20    0.40
  -6   0  12  180.98    5.30
  -6   0  12  175.08    5.50
  -6   0  12  179.48    5.30
  -6   0  12  177.68    5.30
  -6   0  12  180.58    5.30
   6   0 -12  180.58    5.30
   5   0 -12    0.20    0.10
  -5   0  12    0.10    0.20
  -5   0  12    0.10    0.10
  -5   0  12    0.10    0.10
  -5   0  12    0.40    0.10
  -5   0  12    0.30    0.10
   4   0 -12    1.80    0.10
  -4   0  12    1.80    0.20
  -4   0  12    1.90    0.30
  -4   0  12    1.80    0.20
  -4   0  12    1.70    0.10
  -4   0  12    1.60    0.20
  -4   0  12    1.90    0.20
  -3   0  12   69.19    2.10
  -3   0  12   72.59    2.10
  -3   0  12   72.69    2.20
  -3   0  12   70.99    2.20
  -3   0  12   69.79    2.30
   3   0 -12   70.79    2.10
  -3   0  12   70.89    2.20
  -2   0  12 1125.29   33.50
   2   0 -12 1153.88   33.20
  -2   0  12 1093.39   33.20
  -2   0  12 1135.19   33.20
  -2   0  12 1148.59   33.30
  -2   0  12 1170.08   33.30
  -2   0  12 1145.89   33.30
   2   0 -12 1110.89   33.20
  -1   0  12  707.53   20.60
  -1   0  12  661.63   20.70
   1   0 -12  666.23   20.50
  -1   0  12  726.03   20.50
   1   0 -12  734.73   20.50
  -1   0  12  712.23   20.60
  -1   0  12  695.23   20.60
   0   0  12    2.20    0.20
   0   0  12    2.20    0.20
   0   0 -12    2.40    0.10
   0   0 -12    2.10    0.20
   0   0  12    2.10    0.20
   0   0  12    2.30    0.30
  -1   0 -12   18.80    0.60
  -1   0 -12   18.90    0.60
   1   0  12   19.20    0.70
   1   0  12   19.00    0.70
   1   0  12   20.00    0.60
  -2   0 -12   46.30    1.50
   2   0  12   48.20    1.50
  -2   0 -12   48.00    1.50
   2   0  12   48.30    1.50
   2   0  12   47.80    1.50
   3   0  12   21.70    0.70
   3   0  12   21.70    0.80
   3   0  12   21.40    0.70
  -3   0 -12   21.00    0.70
  -3   0 -12   21.60    0.70
   4   0  12   49.20    1.60
  -4   0 -12   50.39    1.60
   4   0  12   49.90    1.50
   5   0  12   17.90    0.60
  -5   0 -12   17.70    0.60
  -6   0 -12    0.80    0.10
   6   0  12    0.80    0.10
  -7   0 -12   22.60    0.70
  -8   0 -12    4.20    0.20
 -17  -1  12   26.50    0.90
 -17   1  12   26.60    0.90
  17   1 -12   28.00    0.90
 -17   1  12   27.00    0.80
 -17   1  12   26.80    0.80
 -16  -1  12    7.10    0.30
 -16  -1  12    7.40    0.30
 -16  -1  12    7.40    0.30
 -16  -1  12    7.40    0.30
  16  -1 -12    7.70    0.30
 -16   1  12    7.50    0.30
 -16   1  12    7.10    0.30
 -16   1  12    7.20    0.30
  16   1 -12    7.80    0.30
 -16   1  12    7.40    0.30
  16   1 -12    7.30    0.30
 -15  -1  12   15.20    0.60
  15  -1 -12   15.10    0.50
 -15  -1  12   15.60    0.60
 -15  -1  12   14.70    0.50
 -15  -1  12   15.30    0.50
 -15   1  12   15.50    0.50
 -15   1  12   15.80    0.60
 -15   1  12   16.00    0.50
  15   1 -12   15.50    0.60
  15   1 -12   16.00    0.50
 -15   1  12   15.40    0.50
 -14  -1  12   33.10    1.10
 -14  -1  12   34.70    1.10
 -14  -1  12   34.60    1.10
  14  -1 -12   31.90    1.00
 -14  -1  12   34.80    1.10
 -14   1  12   34.30    1.10
  14   1 -12   34.20    1.10
 -14   1  12   33.90    1.10
 -14   1  12   33.50    1.10
  14   1 -12   34.80    1.10
 -14   1  12   34.30    1.10
 -13  -1  12   16.50    0.60
 -13  -1  12   17.50    0.60
  13  -1 -12   14.40    0.50
 -13  -1  12   16.90    0.60
 -13  -1  12   15.80    0.60
  13   1 -12   16.30    0.60
 -13   1  12   16.50    0.60
  13   1 -12   16.20    0.60
 -13   1  12   16.50    0.60
 -13   1  12   16.10    0.60
 -13   1  12   16.40    0.60
 -12  -1  12   50.49    1.60
 -12  -1  12   50.49    1.50
 -12  -1  12   51.79    1.60
  12  -1 -12   45.10    1.50
 -12  -1  12   48.90    1.50
 -12   1  12   50.19    1.50
 -12   1  12   49.20    1.60
  12   1 -12   49.00    1.50
 -12   1  12   50.69    1.50
  12   1 -12   49.00    1.60
 -12   1  12   49.20    1.60
 -11  -1  12    4.20    0.20
 -11  -1  12    4.60    0.20
 -11  -1  12    4.40    0.30
 -11  -1  12    4.30    0.30
 -11   1  12    4.20    0.20
  11   1 -12    4.50    0.30
 -11   1  12    4.60    0.30
 -11   1  12    4.20    0.20
  11   1 -12    4.30    0.20
 -11   1  12    4.30    0.30
 -10  -1  12    2.70    0.20
 -10  -1  12    3.00    0.20
 -10  -1  12    3.20    0.20
 -10  -1  12    2.90    0.20
  10   1 -12    2.90    0.20
 -10   1  12    2.80    0.20
 -10   1  12    3.00    0.20
 -10   1  12    2.80    0.20
  10   1 -12    2.70    0.20
  -9  -1  12  368.06   10.90
  -9  -1  12  377.46   10.80
  -9  -1  12  354.06   10.80
  -9  -1  12  373.56   10.80
  -9   1  12  366.46   10.80
   9   1 -12  349.07   10.80
  -9   1  12  365.46   10.80
  -9   1  12  367.06   10.90
   9   1 -12  388.16   10.80
  -8  -1  12   90.59    2.60
  -8  -1  12   83.89    2.60
  -8  -1  12   85.99    2.60
  -8  -1  12   89.29    2.60
  -8  -1  12   82.89    2.80
   8  -1 -12   87.59    2.80
  -8   1  12   84.49    2.60
   8   1 -12   92.69    2.60
   8   1 -12   81.69    2.60
  -8   1  12   82.89    2.80
  -8   1  12   89.69    2.60
  -8   1  12   87.49    2.60
   8   1 -12   88.19    2.80
  -7  -1  12   12.10    0.50
  -7  -1  12   11.90    0.50
  -7  -1  12   11.60    0.60
  -7  -1  12   12.80    0.50
  -7  -1  12   12.40    0.50
  -7   1  12   12.30    0.50
  -7   1  12   12.40    0.50
   7   1 -12   12.30    0.40
  -7   1  12   11.40    0.60
  -7   1  12   12.30    0.40
  -6  -1  12   12.20    0.40
  -6  -1  12   10.50    0.60
  -6  -1  12   11.20    0.40
  -6  -1  12   11.00    0.40
  -6  -1  12   11.10    0.40
  -6   1  12   11.20    0.40
  -6   1  12   10.60    0.40
  -6   1  12   11.40    0.60
  -6   1  12   10.50    0.40
  -6   1  12   11.00    0.50
   6   1 -12   11.60    0.40
  -5  -1  12    1.10    0.10
  -5  -1  12    1.00    0.20
  -5  -1  12    1.00    0.10
  -5  -1  12    1.10    0.10
  -5  -1  12    0.90    0.10
  -5   1  12    1.10    0.10
   5   1 -12    0.90    0.10
  -5   1  12    0.80    0.20
  -5   1  12    0.90    0.10
  -5   1  12    0.80    0.10
  -5   1  12    0.70    0.10
  -4  -1  12   73.59    2.20
  -4  -1  12   73.99    2.20
  -4  -1  12   71.39    2.20
  -4  -1  12   75.29    2.20
  -4  -1  12   71.19    2.40
  -4  -1  12   70.69    2.20
  -4   1  12   73.19    2.20
  -4   1  12   72.59    2.20
  -4   1  12   68.39    2.20
  -4   1  12   72.89    2.20
  -4   1  12   71.59    2.40
   3  -1 -12   59.59    1.70
  -3  -1  12   52.79    1.70
  -3  -1  12   56.79    1.70
  -3  -1  12   52.89    1.70
  -3  -1  12   53.79    1.70
  -3  -1  12   54.89    1.70
  -3  -1  12   52.89    1.90
  -3   1  12   54.59    1.90
  -3   1  12   53.79    1.70
  -3   1  12   54.79    1.70
  -3   1  12   54.59    1.70
  -3   1  12   54.69    1.70
   3   1 -12   53.99    1.70
   3   1 -12   56.39    1.70
   2  -1 -12   63.09    1.90
  -2  -1  12   60.49    1.90
  -2  -1  12   60.59    1.90
  -2  -1  12   65.39    2.00
  -2  -1  12   60.59    2.10
  -2  -1  12   61.59    1.90
  -2  -1  12   62.79    1.90
   2   1 -12   63.59    1.90
   2   1 -12   62.69    1.90
  -2   1  12   60.59    1.90
  -2   1  12   65.09    2.00
  -2   1  12   63.19    1.90
  -2   1  12   59.19    2.10
   2   1 -12   65.79    1.90
  -1  -1  12    1.30    0.20
  -1  -1  12    1.90    0.20
  -1  -1  12    2.00    0.20
  -1  -1  12    2.10    0.30
   1  -1 -12    2.10    0.10
  -1  -1  12    2.60    0.20
   1   1 -12    1.90    0.10
  -1   1  12    2.00    0.20
  -1   1  12    1.50    0.30
  -1   1  12    1.80    0.20
   1   1 -12    1.70    0.20
  -1   1  12    2.20    0.20
   1   1 -12    2.00    0.20
   0  -1  12   24.20    0.80
   0  -1  12   24.00    0.80
   0  -1 -12   25.10    0.80
   0  -1  12   24.60    0.80
   0   1 -12   24.40    0.80
   0   1 -12   25.30    0.80
   0   1 -12   23.70    0.80
   0   1  12   25.00    0.80
   0   1  12   25.00    0.90
   1  -1  12   36.00    1.20
  -1  -1 -12   36.00    1.10
   1  -1  12   35.10    1.10
   1  -1  12   37.10    1.10
   1   1  12   36.30    1.10
   1   1  12   36.20    1.20
  -1   1 -12   34.60    1.10
  -1   1 -12   35.30    1.10
   1   1  12   36.80    1.20
  -1   1 -12   33.60    1.10
   2  -1  12    1.50    0.10
  -2  -1 -12    1.80    0.10
   2  -1  12    1.70    0.20
   2  -1  12    1.60    0.20
   2   1  12    1.70    0.20
  -2   1 -12    1.80    0.20
   2   1  12    1.60    0.20
  -2   1 -12    2.10    0.20
   2   1  12    1.50    0.10
   3  -1  12   50.49    1.50
  -3  -1 -12   50.09    1.50
   3  -1  12   48.40    1.60
  -3   1 -12   49.50    1.50
   3   1  12   49.00    1.50
  -3   1 -12   48.00    1.50
   3   1  12   47.20    1.60
   3   1  12   50.29    1.60
   4  -1  12   53.49    1.60
  -4  -1 -12   53.99    1.70
  -4  -1 -12   49.30    1.60
   4   1  12   50.19    1.60
   4   1  12   51.99    1.60
  -4   1 -12   52.89    1.60
   4   1  12   53.89    1.60
   5  -1  12   22.20    0.70
  -5  -1 -12   22.70    0.80
   5   1  12   22.00    0.70
  -5   1 -12   22.20    0.70
  -6  -1 -12   77.49    2.30
   6  -1  12   76.29    2.30
  -6   1 -12   77.79    2.30
   6   1  12   73.29    2.30
  -7  -1 -12    0.10    0.10
  -7   1 -12    0.10    0.10
  -8  -1 -12    3.50    0.20
 -16  -2  12    8.80    0.30
 -16   2  12    8.70    0.30
 -16   2  12    8.40    0.30
  16   2 -12    9.10    0.30
 -16   2  12    8.50    0.30
  15  -2 -12    8.70    0.30
 -15  -2  12    9.00    0.30
 -15   2  12    9.10    0.30
 -15   2  12    8.80    0.30
 -15   2  12    9.20    0.30
  15   2 -12    9.30    0.40
 -14  -2  12   13.00    0.50
 -14  -2  12   11.80    0.40
  14   2 -12   12.80    0.50
 -14   2  12   12.80    0.50
 -14   2  12   13.00    0.50
 -14   2  12   12.70    0.50
 -13  -2  12   74.19    2.30
 -13  -2  12   78.79    2.30
  13   2 -12   76.99    2.30
 -13   2  12   75.79    2.30
 -13   2  12   74.89    2.30
  13   2 -12   72.19    2.30
 -13   2  12   73.39    2.30
 -12  -2  12   46.90    1.40
 -12  -2  12   45.40    1.40
 -12  -2  12   47.80    1.50
 -12   2  12   46.80    1.40
  12   2 -12   45.80    1.50
  12   2 -12   45.70    1.40
 -12   2  12   46.80    1.40
 -12   2  12   45.00    1.40
 -12   2  12   45.20    1.40
 -11  -2  12   46.40    1.40
 -11  -2  12   45.70    1.40
 -11  -2  12   46.30    1.40
  11   2 -12   45.20    1.40
 -11   2  12   45.10    1.40
 -11   2  12   44.30    1.40
  11   2 -12   45.10    1.40
 -11   2  12   45.30    1.40
 -10  -2  12   46.40    1.50
 -10  -2  12   48.30    1.50
 -10  -2  12   48.80    1.50
 -10   2  12   46.00    1.50
 -10   2  12   48.10    1.50
 -10   2  12   47.80    1.50
  10   2 -12   46.80    1.50
  10   2 -12   47.40    1.50
  -9  -2  12  388.56   11.10
  -9  -2  12  375.36   11.10
  -9  -2  12  380.06   11.10
   9   2 -12  385.26   11.10
   9   2 -12  374.86   11.20
  -9   2  12  379.36   11.10
  -9   2  12  370.26   11.10
  -9   2  12  370.16   11.10
  -8  -2  12    0.50    0.10
  -8  -2  12    0.70    0.10
  -8  -2  12    0.50    0.10
  -8  -2  12    0.40    0.10
   8   2 -12    0.50    0.10
   8   2 -12    0.50    0.10
  -8   2  12    0.50    0.10
  -8   2  12    0.50    0.10
  -7  -2  12   13.80    0.50
  -7  -2  12   14.00    0.50
  -7  -2  12   14.30    0.50
  -7   2  12   14.20    0.50
   7   2 -12   14.00    0.50
  -6  -2  12   50.39    1.50
  -6  -2  12   52.79    1.60
  -6  -2  12   48.60    1.50
  -6   2  12   47.80    1.50
   6   2 -12   48.20    1.50
  -6   2  12   48.20    1.60
  -5  -2  12  123.29    3.70
  -5  -2  12  118.09    3.60
  -5  -2  12  126.29    3.70
  -5  -2  12  125.29    3.70
  -5   2  12  117.99    3.60
   5   2 -12  122.29    3.60
  -5   2  12  119.49    3.70
   5   2 -12  124.49    3.70
  -5   2  12  123.49    3.70
  -4  -2  12    0.30    0.10
  -4  -2  12    0.10    0.10
  -4  -2  12    0.20    0.10
  -4  -2  12    0.00    0.10
  -4   2  12    0.20    0.10
  -4   2  12    0.10    0.10
   4   2 -12    0.10    0.10
  -4   2  12    0.10    0.10
  -3  -2  12   30.70    1.00
  -3  -2  12   29.60    1.00
  -3   2  12   31.60    1.00
   3   2 -12   30.70    1.00
  -3   2  12   30.50    1.00
   3   2 -12   31.30    1.00
   3   2 -12   30.60    1.00
  -3   2  12   30.40    1.00
  -2  -2  12    0.50    0.10
   2  -2 -12    0.60    0.10
  -2  -2  12    0.60    0.10
  -2  -2  12    0.40    0.10
  -2   2  12    0.60    0.10
  -2   2  12    0.60    0.10
   2   2 -12    0.40    0.10
  -2   2  12    0.50    0.10
   2   2 -12    0.50    0.10
   2   2 -12    0.40    0.10
  -1  -2  12    1.80    0.20
  -1  -2  12    2.30    0.20
   1  -2 -12    1.80    0.10
  -1   2  12    1.90    0.20
   1   2 -12    2.40    0.20
  -1   2  12    1.40    0.20
  -1   2  12    1.70    0.20
   1   2 -12    1.80    0.20
   0  -2  12    8.80    0.40
   0  -2 -12    9.10    0.30
   0  -2  12    8.60    0.40
   0   2  12    8.50    0.40
   0   2  12    8.70    0.40
   0   2  12    8.70    0.40
   0   2 -12    8.80    0.40
   0   2 -12    9.40    0.40
   1  -2  12  161.08    5.00
  -1  -2 -12  163.78    4.90
   1  -2  12  168.58    4.90
   1   2  12  166.38    5.00
  -1   2 -12  167.18    4.90
   1   2  12  165.68    5.00
  -1   2 -12  166.68    5.00
   1   2  12  167.28    4.90
   2  -2  12    0.20    0.10
   2  -2  12    0.10    0.10
  -2  -2 -12    0.10    0.10
   2   2  12    0.10    0.10
   2   2  12    0.20    0.10
   2   2  12    0.20    0.10
  -2   2 -12    0.50    0.10
  -2   2 -12    0.10    0.10
  -3  -2 -12    4.10    0.20
  -3  -2 -12    4.30    0.30
   3  -2  12    4.00    0.20
   3   2  12    4.00    0.30
  -3   2 -12    3.90    0.20
   3   2  12    4.10    0.20
   3   2  12    4.60    0.30
  -3   2 -12    4.10    0.20
  -4  -2 -12    4.60    0.30
  -4  -2 -12    5.30    0.20
   4  -2  12    4.40    0.20
  -4   2 -12    4.80    0.20
   4   2  12    4.60    0.30
   4   2  12    4.40    0.30
   4   2  12    4.50    0.20
  -4   2 -12    4.30    0.20
  -5  -2 -12    8.10    0.30
  -5  -2 -12    8.90    0.40
   5  -2  12    8.60    0.30
   5   2  12    8.70    0.30
  -5   2 -12    8.60    0.30
  -5   2 -12    8.90    0.30
   6  -2  12    0.90    0.10
  -6  -2 -12    1.00    0.10
  -6   2 -12    0.90    0.10
  -6   2 -12    0.70    0.10
   6   2  12    0.90    0.10
  -7  -2 -12   10.50    0.40
  -7   2 -12   10.40    0.40
  15   3 -12    1.50    0.10
  14   3 -12    5.70    0.20
 -14   3  12    5.60    0.20
 -14   3  12    5.50    0.20
  13   3 -12   17.20    0.60
  12   3 -12   50.29    1.60
  11   3 -12   19.20    0.70
 -10  -3  12   19.70    0.70
  10   3 -12   20.90    0.70
  10   3 -12   19.20    0.70
  -9  -3  12   51.89    1.60
  -9  -3  12   52.99    1.60
   9   3 -12   51.59    1.60
   9   3 -12   52.89    1.60
  -8  -3  12   28.80    0.90
  -8  -3  12   28.60    0.90
   8   3 -12   27.50    0.90
   8   3 -12   28.40    0.90
  -7  -3  12   36.20    1.20
  -7  -3  12   36.80    1.20
   7   3 -12   36.10    1.20
   7   3 -12   36.20    1.20
   7   3 -12   37.10    1.20
  -6  -3  12   41.00    1.30
  -6  -3  12   41.10    1.30
   6   3 -12   40.10    1.30
  -6   3  12   39.30    1.30
   6   3 -12   38.60    1.30
   6   3 -12   41.30    1.30
  -5  -3  12   25.30    0.90
  -5  -3  12   25.00    0.80
  -5  -3  12   23.70    0.80
   5   3 -12   25.20    0.80
   5   3 -12   24.90    0.80
   5   3 -12   24.50    0.80
  -5   3  12   24.20    0.80
  -5   3  12   24.30    0.80
  -4  -3  12    7.30    0.40
  -4  -3  12    7.10    0.30
   4   3 -12    7.20    0.30
  -4   3  12    7.00    0.30
   4   3 -12    7.40    0.30
  -4   3  12    7.00    0.40
  -3  -3  12    1.10    0.20
  -3  -3  12    0.70    0.10
   3   3 -12    0.80    0.10
  -3   3  12    0.60    0.10
   3   3 -12    0.80    0.10
  -3   3  12    1.00    0.20
   2  -3 -12   71.39    2.20
  -2  -3  12   75.89    2.30
  -2  -3  12   72.89    2.30
  -2   3  12   75.79    2.30
   2   3 -12   76.09    2.30
   2   3 -12   74.79    2.30
  -2   3  12   73.89    2.30
  -2   3  12   78.09    2.30
  -1  -3  12    3.60    0.20
  -1  -3  12    3.60    0.30
   1  -3 -12    3.50    0.20
  -1   3  12    3.90    0.20
   1   3 -12    3.70    0.20
  -1   3  12    3.70    0.30
  -1   3  12    3.60    0.30
   1   3 -12    3.80    0.20
   0  -3  12  104.49    3.20
   0  -3  12  106.29    3.20
   0  -3 -12  105.89    3.20
   0   3 -12  108.19    3.20
   0   3  12  107.19    3.20
   0   3 -12  107.19    3.20
   0   3  12  101.39    3.20
   0   3  12  105.09    3.20
   1  -3  12   42.90    1.30
  -1  -3 -12   41.70    1.30
  -1  -3 -12   40.90    1.30
   1  -3  12   40.60    1.40
  -1   3 -12   43.60    1.30
  -1   3 -12   43.10    1.30
   1   3  12   44.30    1.40
   1   3  12   41.80    1.30
   1   3  12   43.50    1.30
   2  -3  12  265.37    8.20
   2  -3  12  288.57    8.20
  -2  -3 -12  279.77    8.20
  -2  -3 -12  267.57    8.20
  -2   3 -12  288.87    8.20
   2   3  12  275.37    8.20
  -2   3 -12  290.27    8.20
   2   3  12  266.27    8.20
   2   3  12  283.47    8.20
  -3  -3 -12  339.37    9.90
  -3  -3 -12  331.27    9.90
   3  -3  12  344.87    9.90
  -3   3 -12  342.97    9.90
   3   3  12  333.87    9.90
  -3   3 -12  335.27    9.90
   3   3  12  328.77    9.90
  -4  -3 -12  135.49    4.10
   4  -3  12  140.79    4.10
  -4  -3 -12  136.99    4.10
  -4   3 -12  144.19    4.10
   4   3  12  136.19    4.10
   4   3  12  131.99    4.10
  -4   3 -12  136.69    4.10
   5  -3  12    3.20    0.20
  -5   3 -12    3.00    0.20
  -5   3 -12    3.10    0.20
   5   3  12    3.10    0.10
  -6   3 -12    6.10    0.20
  -6   3 -12    6.20    0.30
  12   4 -12   47.90    1.50
  11   4 -12   56.69    1.70
  10   4 -12   18.90    0.60
  -9  -4  12    6.80    0.30
   9   4 -12    6.40    0.30
  -8  -4  12   33.00    1.10
   8   4 -12   32.40    1.00
  -7  -4  12    1.70    0.20
   7   4 -12    1.50    0.20
  -6  -4  12    0.50    0.10
   6   4 -12    0.50    0.10
   6   4 -12    0.50    0.10
  -5  -4  12   10.50    0.40
  -5  -4  12    9.70    0.40
  -5   4  12    8.60    0.40
   5   4 -12   10.10    0.40
  -5   4  12   10.20    0.40
   5   4 -12    9.70    0.40
  -4  -4  12    0.30    0.10
  -4  -4  12    0.30    0.10
   4   4 -12    0.50    0.10
  -4   4  12    0.30    0.10
  -4   4  12    0.20    0.10
   4   4 -12    0.30    0.10
  -3  -4  12    5.10    0.30
  -3  -4  12    5.10    0.20
  -3   4  12    5.20    0.20
   3   4 -12    5.20    0.20
  -3   4  12    5.80    0.30
   2  -4 -12   66.99    2.10
  -2  -4  12   71.79    2.20
  -2  -4  12   70.59    2.10
  -2   4  12   73.49    2.10
   2   4 -12   73.29    2.10
  -2   4  12   68.39    2.20
  -1  -4  12   39.90    1.30
  -1  -4  12   41.00    1.20
   1  -4 -12   39.50    1.20
  -1   4  12   41.30    1.20
   1   4 -12   41.00    1.20
  -1   4  12   38.00    1.30
   0  -4  12    2.20    0.20
   0  -4  12    2.20    0.20
   0  -4 -12    2.30    0.10
   0   4  12    2.30    0.20
   0   4 -12    2.40    0.20
   0   4 -12    2.30    0.20
   0   4  12    2.10    0.20
  -1  -4 -12    8.00    0.30
   1  -4  12    8.20    0.30
   1  -4  12    7.90    0.30
  -1   4 -12    7.60    0.30
   1   4  12    8.30    0.30
  -1   4 -12    7.80    0.30
   1   4  12    8.00    0.30
  -2  -4 -12   40.70    1.30
   2  -4  12   41.90    1.30
  -2   4 -12   43.00    1.30
   2   4  12   42.40    1.30
  -2   4 -12   39.40    1.30
   2   4  12   41.60    1.30
   3  -4  12   36.50    1.10
  -3   4 -12   33.20    1.10
   3   4  12   36.10    1.10
   3   4  12   33.10    1.10
  -3   4 -12   35.40    1.10
  -7  -5  12   79.49    2.40
   7   5 -12   82.79    2.40
  -6  -5  12    0.30    0.10
   6   5 -12    0.40    0.10
  -5  -5  12    2.60    0.20
   5   5 -12    2.70    0.10
  -4  -5  12    3.30    0.20
   4   5 -12    3.40    0.20
  -4   5  12    3.10    0.10
  -3  -5  12    0.90    0.10
  -3   5  12    1.20    0.10
  -3   5  12    0.60    0.10
  -2   5  12    4.60    0.20
 -17   0  13    0.10    0.10
 -17   0  13    0.00    0.10
  17   0 -13    0.00    0.10
 -17   0  13    0.10    0.10
 -17   0  13    0.00    0.10
  16   0 -13    0.00    0.10
 -16   0  13    0.00    0.10
 -16   0  13    0.10    0.10
 -16   0  13   -0.10    0.10
 -16   0  13    0.00    0.10
  16   0 -13    0.00    0.10
 -15   0  13    0.10    0.10
 -15   0  13    0.10    0.10
  15   0 -13    0.10    0.10
 -15   0  13    0.00    0.10
 -15   0  13    0.00    0.10
  15   0 -13    0.00    0.10
 -14   0  13    0.10    0.10
 -14   0  13    0.00    0.10
 -14   0  13    0.00    0.10
 -14   0  13    0.00    0.10
  14   0 -13    0.00    0.10
 -13   0  13    0.10    0.10
 -13   0  13    0.00    0.10
  13   0 -13    0.10    0.10
 -13   0  13    0.00    0.10
 -13   0  13    0.00    0.10
 -12   0  13    0.00    0.10
 -12   0  13    0.10    0.10
 -12   0  13    0.10    0.10
  12   0 -13    0.00    0.10
 -12   0  13    0.10    0.10
  11   0 -13    0.00    0.10
 -11   0  13   -0.10    0.10
 -11   0  13    0.10    0.10
 -11   0  13    0.00    0.10
 -11   0  13    0.00    0.10
 -10   0  13    0.00    0.10
 -10   0  13    0.10    0.10
 -10   0  13    0.10    0.10
   9   0 -13    0.00    0.10
  -9   0  13    0.10    0.10
  -9   0  13    0.20    0.10
  -9   0  13    0.30    0.10
  -8   0  13    0.00    0.10
  -8   0  13    0.00    0.10
   7   0 -13    0.10    0.10
  -7   0  13    0.10    0.10
  -7   0  13    0.10    0.10
  -7   0  13    0.10    0.10
  -7   0  13    0.00    0.10
  -6   0  13    0.10    0.10
   6   0 -13    0.00    0.10
  -6   0  13    0.00    0.10
  -6   0  13    0.00    0.10
  -6   0  13   -0.10    0.10
   5   0 -13    0.10    0.10
  -5   0  13    0.00    0.10
  -5   0  13    0.00    0.10
  -5   0  13    0.00    0.10
  -5   0  13    0.00    0.10
  -5   0  13    0.00    0.20
  -5   0  13    0.00    0.10
  -4   0  13    0.00    0.10
   4   0 -13    0.00    0.10
  -4   0  13    0.10    0.10
  -4   0  13    0.00    0.10
  -4   0  13    0.30    0.10
  -4   0  13    0.00    0.10
  -3   0  13   -0.10    0.10
  -3   0  13    0.10    0.10
  -3   0  13    0.30    0.10
  -3   0  13    0.00    0.10
  -3   0  13    0.00    0.10
   3   0 -13    0.00    0.10
   3   0 -13    0.00    0.10
   2   0 -13    0.00    0.10
  -2   0  13    0.00    0.10
  -2   0  13    0.00    0.10
   2   0 -13    0.10    0.10
  -2   0  13    0.00    0.10
  -2   0  13    0.00    0.10
  -1   0  13    0.00    0.10
   1   0 -13    0.10    0.10
  -1   0  13    0.10    0.10
  -1   0  13    0.00    0.10
   1   0 -13   -0.10    0.10
  -1   0  13    0.00    0.10
   0   0  13    0.10    0.10
   0   0 -13    0.00    0.10
   0   0  13    0.00    0.10
   0   0  13    0.40    0.10
   0   0 -13    0.00    0.10
   1   0  13    0.10    0.10
   1   0  13    0.10    0.10
  -1   0 -13    0.00    0.10
  -1   0 -13    0.00    0.10
   2   0  13    0.00    0.10
   2   0  13    0.10    0.10
   2   0  13   -0.10    0.10
  -2   0 -13    0.00    0.10
  -2   0 -13    0.00    0.10
  -3   0 -13    0.10    0.10
   3   0  13    0.00    0.10
   3   0  13    0.00    0.10
   3   0  13    0.00    0.10
  -4   0 -13    0.10    0.10
   4   0  13    0.00    0.10
   4   0  13    0.00    0.10
   5   0  13    0.00    0.10
  -5   0 -13    0.00    0.10
   6   0  13   -0.10    0.10
  -6   0 -13    0.00    0.10
 -17  -1  13   57.49    1.70
  17   1 -13   60.59    1.80
 -17   1  13   56.09    1.70
 -17   1  13   57.29    1.70
 -16  -1  13    6.30    0.20
  16  -1 -13    7.10    0.20
 -16  -1  13    6.80    0.30
 -16  -1  13    6.30    0.30
 -16   1  13    6.70    0.30
 -16   1  13    6.60    0.30
 -16   1  13    6.40    0.30
 -16   1  13    6.80    0.30
  16   1 -13    6.70    0.30
  16   1 -13    6.60    0.30
 -15  -1  13   15.70    0.50
 -15  -1  13   16.40    0.60
 -15  -1  13   15.50    0.50
 -15  -1  13   16.70    0.60
  15  -1 -13   15.50    0.50
  15   1 -13   16.00    0.60
 -15   1  13   15.70    0.60
 -15   1  13   16.10    0.50
 -15   1  13   16.50    0.50
 -15   1  13   15.80    0.60
  15   1 -13   17.00    0.50
  14  -1 -13    1.20    0.10
 -14  -1  13    1.20    0.10
 -14  -1  13    1.40    0.10
 -14  -1  13    1.00    0.10
 -14  -1  13    1.30    0.10
 -14   1  13    1.30    0.20
  14   1 -13    1.10    0.10
 -14   1  13    1.30    0.10
 -14   1  13    1.40    0.10
  14   1 -13    1.20    0.10
 -14   1  13    1.30    0.10
 -13  -1  13   38.10    1.20
 -13  -1  13   37.20    1.20
  13  -1 -13   34.30    1.10
 -13  -1  13   39.20    1.20
 -13  -1  13   36.50    1.20
 -13   1  13   36.00    1.20
 -13   1  13   38.70    1.20
 -13   1  13   37.70    1.20
  13   1 -13   36.60    1.20
  13   1 -13   36.90    1.20
 -13   1  13   37.30    1.20
 -12  -1  13    2.30    0.20
 -12  -1  13    2.40    0.20
 -12  -1  13    2.10    0.20
  12  -1 -13    2.30    0.10
 -12  -1  13    2.10    0.20
 -12   1  13    2.40    0.20
  12   1 -13    2.50    0.20
 -12   1  13    2.60    0.20
 -12   1  13    2.40    0.20
  12   1 -13    2.10    0.20
 -12   1  13    2.30    0.20
 -11  -1  13   21.90    0.80
 -11  -1  13   22.90    0.70
 -11  -1  13   21.90    0.80
 -11  -1  13   22.40    0.70
 -11   1  13   21.20    0.80
 -11   1  13   23.00    0.70
 -11   1  13   21.90    0.70
  11   1 -13   21.30    0.70
  11   1 -13   21.40    0.80
 -10  -1  13  156.98    4.60
 -10  -1  13  148.69    4.60
 -10  -1  13  154.08    4.60
 -10  -1  13  155.88    4.60
  10   1 -13  145.59    4.60
 -10   1  13  149.99    4.50
 -10   1  13  151.48    4.60
 -10   1  13  157.08    4.60
  10   1 -13  154.18    4.50
  -9  -1  13   31.40    1.00
  -9  -1  13   30.10    1.00
  -9  -1  13   31.70    1.00
  -9   1  13   31.50    1.00
  -9   1  13   32.00    1.00
   9   1 -13   29.90    1.10
   9   1 -13   31.30    1.00
  -9   1  13   30.80    1.00
  -8  -1  13    5.10    0.30
  -8  -1  13    4.90    0.30
  -8  -1  13    5.10    0.30
  -8  -1  13    5.20    0.30
  -8   1  13    5.00    0.30
  -8   1  13    5.30    0.30
   8   1 -13    5.30    0.20
  -8   1  13    4.90    0.30
  -7  -1  13    2.30    0.20
  -7  -1  13    2.30    0.20
  -7  -1  13    2.10    0.20
  -7  -1  13    2.50    0.20
  -7   1  13    2.30    0.20
   7   1 -13    2.40    0.20
  -7   1  13    2.30    0.20
  -7   1  13    2.20    0.20
  -7   1  13    2.90    0.20
  -6  -1  13  110.29    3.30
  -6  -1  13  112.69    3.30
  -6  -1  13  108.39    3.30
  -6  -1  13  113.69    3.40
   6   1 -13  112.59    3.30
  -6   1  13  111.39    3.40
  -6   1  13  105.89    3.30
  -6   1  13  111.89    3.30
  -6   1  13  110.69    3.40
  -5  -1  13   14.20    0.50
  -5  -1  13   13.10    0.50
  -5  -1  13   13.90    0.50
  -5  -1  13   14.20    0.50
  -5  -1  13   14.10    0.50
  -5   1  13   14.50    0.50
  -5   1  13   13.60    0.50
   5   1 -13   14.70    0.50
  -5   1  13   14.30    0.50
  -5   1  13   13.40    0.50
  -4  -1  13    0.50    0.10
   4  -1 -13    0.80    0.10
  -4  -1  13    0.80    0.10
  -4  -1  13    0.60    0.10
  -4  -1  13    0.60    0.10
  -4  -1  13    0.40    0.10
   4   1 -13    0.50    0.10
  -4   1  13    0.40    0.10
  -4   1  13    0.50    0.10
  -4   1  13    0.60    0.10
  -4   1  13    0.90    0.10
  -3  -1  13    4.10    0.20
   3  -1 -13    4.10    0.20
  -3  -1  13    3.80    0.30
  -3  -1  13    4.40    0.30
  -3  -1  13    3.90    0.20
  -3  -1  13    4.30    0.30
   3   1 -13    4.30    0.20
  -3   1  13    4.10    0.30
   3   1 -13    4.10    0.20
  -3   1  13    4.50    0.30
  -3   1  13    3.60    0.20
   3   1 -13    4.40    0.20
  -3   1  13    4.10    0.20
  -2  -1  13    5.10    0.30
  -2  -1  13    4.60    0.30
  -2  -1  13    4.80    0.30
   2  -1 -13    5.10    0.20
  -2  -1  13    4.80    0.20
  -2   1  13    5.20    0.20
   2   1 -13    5.60    0.20
  -2   1  13    5.40    0.30
   2   1 -13    5.20    0.30
  -2   1  13    5.10    0.30
   2   1 -13    4.90    0.20
  -1  -1  13  139.49    4.10
  -1  -1  13  131.39    4.20
  -1  -1  13  136.89    4.20
   1  -1 -13  142.09    4.10
  -1  -1  13  138.49    4.20
   1   1 -13  141.49    4.20
  -1   1  13  143.39    4.20
   1   1 -13  140.69    4.10
  -1   1  13  139.69    4.10
   1   1 -13  132.99    4.10
  -1   1  13  141.49    4.20
   0  -1 -13   42.80    1.30
   0  -1  13   38.80    1.30
   0  -1  13   41.20    1.30
   0  -1  13   39.80    1.30
   0   1  13   40.90    1.30
   0   1 -13   40.20    1.30
   0   1  13   42.00    1.30
   0   1 -13   39.50    1.30
   0   1 -13   39.90    1.30
   0   1  13   41.70    1.30
   1  -1  13   27.80    0.90
   1  -1  13   26.80    0.90
  -1  -1 -13   30.00    0.90
   1  -1  13   27.40    0.90
   1   1  13   27.30    0.90
   1   1  13   28.10    0.90
  -1   1 -13   27.10    0.90
  -1   1 -13   27.00    0.90
   1   1  13   28.90    0.90
  -1   1 -13   23.80    0.90
   2  -1  13  165.28    4.80
   2  -1  13  165.08    4.90
  -2  -1 -13  162.38    4.80
   2   1  13  158.88    4.90
   2   1  13  162.18    4.80
   2   1  13  164.48    4.90
  -2   1 -13  163.08    4.80
  -2   1 -13  156.38    4.80
   3  -1  13    1.70    0.20
   3  -1  13    1.90    0.20
  -3  -1 -13    1.70    0.10
  -3  -1 -13    2.00    0.20
   3   1  13    1.80    0.20
  -3   1 -13    1.70    0.20
   3   1  13    1.80    0.20
[truncated: 63,565 more chars]
